# Supplementary material for: Impact of Bead-Beating Intensity on the Genus- and Species-Level Characterization of the Gut Microbiome Using Amplicon and Complete 16S rRNA Gene Sequencing
Source: Front Cell Infect Microbiol. 2021 Oct 1;11:678522. doi: 10.3389/fcimb.2021.678522 (PMC8517478; doi:10.3389/fcimb.2021.678522)
Supplement: Supplementary file 2 [file Table_1.xlsx]

## Sheet: TABLE1
Table 1: Comparison of OTUs abundance between various bead beating conditions in mouse stool
Name	1 vs. 0 - Max group mean	1 vs. 0 - Log₂ fold change	1 vs. 0 - Fold change	1 vs. 0 - P-value	1 vs. 0 - FDR p-value	1 vs. 0 - Bonferroni	4 vs. 0 - Max group mean	4 vs. 0 - Log₂ fold change	4 vs. 0 - Fold change	4 vs. 0 - P-value	4 vs. 0 - FDR p-value	4 vs. 0 - Bonferroni	4 vs. 1 - Max group mean	4 vs. 1 - Log₂ fold change	4 vs. 1 - Fold change	4 vs. 1 - P-value	4 vs. 1 - FDR p-value	4 vs. 1 - Bonferroni	9 vs. 0 - Max group mean	9 vs. 0 - Log₂ fold change	9 vs. 0 - Fold change	9 vs. 0 - P-value	9 vs. 0 - FDR p-value	9 vs. 0 - Bonferroni	9 vs. 1 - Max group mean	9 vs. 1 - Log₂ fold change	9 vs. 1 - Fold change	9 vs. 1 - P-value	9 vs. 1 - FDR p-value	9 vs. 1 - Bonferroni	9 vs. 4 - Max group mean	9 vs. 4 - Log₂ fold change	9 vs. 4 - Fold change	9 vs. 4 - P-value	9 vs. 4 - FDR p-value	9 vs. 4 - Bonferroni
g__Allobaculum, 230759	7756.6	6.29832	78.7015	0	0	0	10246.4	6.8199	112.978	0	0	0	10246.4	0.521577	1.43552	0.34837	0.993871	1	12903.8	7.27582	154.967	0	0	0	12903.8	0.977499	1.96905	0.0788334	0.918974	1	12903.8	0.455923	1.37166	0.412363	0.993629	1
g__Bifidobacterium, 4376828	4970.2	6.0633	66.8707	0	0	0	7285.8	6.73086	106.216	0	0	0	7285.8	0.667561	1.58839	0.242669	0.993871	1	11197.6	7.50809	182.038	0	0	0	11197.6	1.44479	2.72223	0.0114485	0.918974	1	11197.6	0.777229	1.71384	0.173712	0.993629	1
g__Allobaculum, 4426641	541.2	5.39512	42.0815	8.88178e-16	4.08858e-13	1.22657e-12	941	6.31449	79.5886	0	0	0	941	0.919374	1.89129	0.15198	0.993871	1	1316	6.96082	124.571	0	0	0	1316	1.56571	2.96023	0.014683	0.918974	1	1316	0.646334	1.56519	0.313609	0.993629	1
s__pseudolongum, 519290	296	6.22373	74.7361	1.22125e-15	4.21635e-13	1.68654e-12	392.6	6.75249	107.821	0	0	0	392.6	0.528756	1.44268	0.448323	0.993871	1	615.2	7.55902	188.579	0	0	0	615.2	1.33529	2.52326	0.0554227	0.918974	1	615.2	0.806533	1.749	0.247111	0.993629	1
s__reuteri, 338852	206.8	6.38197	83.3997	3.31069e-13	9.14411e-11	4.57206e-10	368.8	7.33258	161.186	1.11022e-16	3.06644e-14	1.53322e-13	368.8	0.950615	1.9327	0.213823	0.993871	1	542.8	8.03241	261.817	0	0	0	542.8	1.65044	3.1393	0.0308525	0.918974	1	542.8	0.699828	1.62431	0.359615	0.993629	1
g__Allobaculum, 272334	166.6	5.40864	42.478	2.62661e-11	6.04558e-09	3.62735e-08	276.4	6.23198	75.1644	1.52101e-14	3.50085e-12	2.10051e-11	276.4	0.823332	1.76949	0.262014	0.993871	1	394.6	6.90714	120.021	0	0	0	394.6	1.4985	2.82548	0.0411144	0.918974	1	394.6	0.675165	1.59678	0.357053	0.993629	1
s__pseudolongum, 681370	129	7.89977	238.818	3.93203e-11	7.75734e-09	5.43014e-08	204	8.69429	414.229	3.48832e-13	6.88196e-11	4.81737e-10	204	0.794515	1.73449	0.29757	0.993871	1	283.4	9.33056	643.84	5.77316e-15	9.96592e-13	7.97273e-12	283.4	1.43079	2.69594	0.0605357	0.918974	1	283.4	0.636273	1.55431	0.403443	0.993629	1
o__Clostridiales, M70574:46:000000000-J6F43:1:2119:9275:16230 1:N:0:ACCTGGAT+CCGATCTT/M70574:46:000000000-J6F43:1:2119:9275:16230 2:N:0:ACCTGGAT+CCGATCTT	55.8	6.22789	74.9517	1.01906e-08	1.75915e-06	1.40732e-05	50.2	6.21426	74.2467	1.11182e-08	1.70603e-06	1.53543e-05	55.8	-0.0136351	-1.0095	0.98554	0.995727	1	59.8	6.45923	87.988	2.8547e-09	3.58395e-07	3.94235e-06	59.8	0.231344	1.17393	0.758316	0.963978	1	59.8	0.24498	1.18508	0.744759	0.993629	1
f__Coriobacteriaceae, 461524	256.4	3.83656	14.2863	6.61207e-08	1.01459e-05	9.13128e-05	412	4.62178	24.6204	7.49133e-11	1.29319e-08	1.03455e-07	412	0.785221	1.72336	0.256384	0.993871	1	726.8	5.62851	49.4711	2.10942e-15	4.16159e-13	2.91311e-12	726.8	1.79196	3.46284	0.00955864	0.918974	1	726.8	1.00673	2.00936	0.145196	0.993629	1
g__Allobaculum, 273997	30	4.00644	16.0716	6.82491e-06	0.00094252	0.0094252	46	4.66646	25.3948	1.49179e-07	1.87287e-05	0.000206016	46	0.660025	1.58011	0.375589	0.993871	1	70.2	5.50583	45.4381	5.18432e-10	7.74179e-08	7.15955e-07	70.2	1.49939	2.82724	0.0434098	0.918974	1	70.2	0.839368	1.78927	0.256458	0.993629	1
g__Lactobacillus, 266445	47.8	4.61819	24.5591	1.26857e-05	0.00159263	0.0175189	110	5.92089	60.5852	2.0475e-08	2.82759e-06	2.82759e-05	110	1.30271	2.46691	0.168412	0.993871	1	152.6	6.54404	93.3151	5.60593e-10	7.74179e-08	7.74179e-07	152.6	1.92585	3.79961	0.0416113	0.918974	1	152.6	0.623146	1.54023	0.508696	0.993629	1
g__Adlercreutzia, 245324	10.8	4.35173	20.4174	0.000139779	0.0160862	0.193035	20	5.31481	39.8032	2.85502e-06	0.000328565	0.00394278	20	0.963085	1.94947	0.159296	0.993871	1	26	5.90119	59.7635	1.88982e-07	2.17487e-05	0.000260984	26	1.54946	2.92708	0.0226448	0.918974	1	26	0.586379	1.50147	0.379747	0.993629	1
g__Allobaculum, 268352	33.4	8.38558	334.434	0.000184348	0.0195834	0.254584	61.6	9.37095	662.12	2.89943e-05	0.00286008	0.0400411	61.6	0.98537	1.97982	0.209105	0.993871	1	108.6	10.3414	1297.37	3.9188e-06	0.000360791	0.00541187	108.6	1.95579	3.87929	0.0124436	0.918974	1	108.6	0.970425	1.95942	0.212908	0.993629	1
o__Clostridiales, 346764	18.6	5.44647	43.6066	0.000213266	0.0210372	0.294521	18.8	5.66359	50.6885	0.000117453	0.0101377	0.162203	18.8	0.217114	1.16241	0.817863	0.993871	1	18.8	5.71003	52.3467	0.000103678	0.0068181	0.14318	18.8	0.263552	1.20043	0.779975	0.963978	1	18.8	0.0464383	1.03271	0.960717	0.997082	1
g__Bifidobacterium, M70574:46:000000000-J6F43:1:1112:7694:3254 1:N:0:TGAATCCG+TAAGATCC/M70574:46:000000000-J6F43:1:1112:7694:3254 2:N:0:TGAATCCG+TAAGATCC	10	4.23511	18.8319	0.00053197	0.0489767	0.734651	12	4.64178	24.9641	0.0001417	0.0115111	0.195688	12	0.406675	1.32563	0.61878	0.993871	1	26.4	5.99713	63.8727	7.42555e-07	7.32478e-05	0.00102547	26.4	1.76202	3.39172	0.0285845	0.918974	1	26.4	1.35534	2.55858	0.0905387	0.993629	1
g__Allobaculum, 277143	8.6	4.75142	26.9351	0.000857863	0.0740443	1	14.6	5.65114	50.253	6.77719e-05	0.00623954	0.093593	14.6	0.89972	1.8657	0.253961	0.993871	1	21.2	6.28935	78.2135	8.83968e-06	0.000762975	0.0122076	21.2	1.53793	2.90377	0.049516	0.918974	1	21.2	0.638208	1.55639	0.407399	0.993629	1
s__gnavus, 309916	11.6	2.62323	6.1613	0.000932882	0.075783	1	20.4	3.59776	12.107	4.25077e-06	0.000451563	0.00587032	20.4	0.974531	1.965	0.11966	0.993871	1	26.2	4.03299	16.3701	2.3049e-07	2.44851e-05	0.000318306	26.2	1.40976	2.65693	0.0236104	0.918974	1	26.2	0.435228	1.35212	0.475435	0.993629	1
g__Allobaculum, 276046	11.4	6.7821	110.057	0.00234983	0.170902	1	15.4	7.38862	167.57	0.00090855	0.0627354	1	15.4	0.606518	1.52258	0.42651	0.993871	1	21.4	7.90194	239.179	0.000384867	0.0241591	0.531501	21.4	1.11984	2.17323	0.139794	0.918974	1	21.4	0.513322	1.42733	0.494744	0.993629	1
g__Lactobacillus, 198641	8.8	3.72411	13.2151	0.00235129	0.170902	1	15.4	4.55098	23.4413	0.000186384	0.0142998	0.257396	15.4	0.826868	1.77383	0.384188	0.993871	1	18	4.95414	30.9989	4.6134e-05	0.00335322	0.0637111	18	1.23003	2.34572	0.194308	0.918974	1	18	0.403165	1.32241	0.667794	0.993629	1
g__Lactobacillus, 171232	6.8	6.27846	77.6255	0.00688709	0.475553	1	10.4	6.95376	123.962	0.00272348	0.144659	1	10.4	0.6753	1.59693	0.500997	0.993871	1	15.8	7.6554	201.607	0.000954671	0.0507825	1	15.8	1.37694	2.59717	0.167413	0.918974	1	15.8	0.701643	1.62636	0.478201	0.993629	1
f__[Mogibacteriaceae], 417981	7.4	6.06599	66.9955	0.00852221	0.556293	1	3.8	5.36841	41.3096	0.020479	0.614814	1	7.4	-0.697586	-1.62179	0.485493	0.993871	1	14.8	7.29745	157.308	0.00150573	0.0717041	1	14.8	1.23146	2.34804	0.199541	0.918974	1	14.8	1.92904	3.80802	0.0502188	0.993629	1
o__Clostridiales, 262541	7.4	3.17949	9.05985	0.00886202	0.556293	1	3.4	2.31041	4.96023	0.0628936	0.76967	1	7.4	-0.869081	-1.8265	0.371419	0.993871	1	9.4	3.76425	13.5879	0.0018563	0.0826953	1	9.4	0.584767	1.4998	0.529563	0.963978	1	9.4	1.45385	2.73938	0.132192	0.993629	1
M70574:46:000000000-J6F43:1:2105:25621:14063 1:N:0:GTGCCATA+CCGATCTT/M70574:46:000000000-J6F43:1:2105:25621:14063 2:N:0:GTGCCATA+CCGATCTT	7	6.06397	66.9018	0.00972776	0.584088	1	4.2	5.35128	40.8221	0.0231387	0.678107	1	7	-0.712694	-1.63886	0.512142	0.993871	1	5.2	6.12549	69.816	0.00907118	0.266538	1	7	0.0615143	1.04356	0.954079	0.987956	1	5.2	0.774208	1.71025	0.478155	0.993629	1
f__Ruminococcaceae, M70574:46:000000000-J6F43:1:2104:22761:19984 1:N:0:GTGCCATA+CCGATCTT/M70574:46:000000000-J6F43:1:2104:22761:19984 2:N:0:GTGCCATA+CCGATCTT	5.6	5.73914	53.4136	0.0109019	0.627313	1	3.8	5.37375	41.4631	0.0175008	0.562061	1	5.6	-0.365382	-1.28822	0.677433	0.993871	1	7.6	6.43995	86.8199	0.00420608	0.156989	1	7.6	0.700819	1.62543	0.40841	0.918974	1	7.6	1.0662	2.09391	0.21882	0.993629	1
o__Clostridiales, M70574:46:000000000-J6F43:1:2118:5714:8608 1:N:0:ACCTGGAT+CACTAATG/M70574:46:000000000-J6F43:1:2118:5714:8608 2:N:0:ACCTGGAT+CACTAATG	6.8	5.88094	58.9306	0.0122915	0.678984	1	12.6	7.03948	131.551	0.00264384	0.144659	1	12.6	1.15854	2.23231	0.273962	0.993871	1	16.2	7.23884	151.045	0.00198767	0.0857806	1	16.2	1.35789	2.56311	0.199367	0.918974	1	16.2	0.199354	1.14818	0.848205	0.993629	1
s__gnavus, 383971	22.2	2.66889	6.35938	0.0137494	0.690577	1	29.4	3.39436	10.5149	0.00166832	0.104725	1	29.4	0.725474	1.65344	0.471459	0.993871	1	34.6	3.48329	11.1834	0.00125696	0.0642914	1	34.6	0.814406	1.75857	0.418941	0.918974	1	34.6	0.0889324	1.06358	0.929404	0.993629	1
o__Clostridiales, 260828	38.6	1.99288	3.98032	0.0140016	0.690577	1	46.8	2.45571	5.48582	0.00242001	0.139251	1	46.8	0.462825	1.37824	0.553723	0.993871	1	78.2	3.20687	9.23343	7.14695e-05	0.00493497	0.0986994	78.2	1.21398	2.31977	0.11931	0.918974	1	78.2	0.751158	1.68314	0.334224	0.993629	1
g__Allobaculum, M70574:46:000000000-J6F43:1:2118:7064:10798 1:N:0:ACCTGGAT+CACTAATG/M70574:46:000000000-J6F43:1:2118:7064:10798 2:N:0:ACCTGGAT+CACTAATG	4.6	5.5383	46.4723	0.0133949	0.690577	1	11.6	6.95975	124.478	0.00178561	0.107214	1	11.6	1.42145	2.67854	0.0748189	0.993871	1	13.6	7.3546	163.665	0.000956079	0.0507825	1	13.6	1.8163	3.52178	0.0221264	0.918974	1	13.6	0.394856	1.31481	0.603845	0.993629	1
g__Ruminococcus, 261519	28	-1.54985	-2.92786	0.0153843	0.709896	1	28	-1.6224	-3.07887	0.0118975	0.432379	1	10.2	-0.0725572	-1.05158	0.912897	0.993871	1	28	-2.24399	-4.73706	0.000789422	0.0454247	1	10.2	-0.694148	-1.61793	0.311738	0.918974	1	8.8	-0.62159	-1.53857	0.368562	0.993629	1
s__gnavus, 181237	7.8	2.50874	5.69122	0.0154214	0.709896	1	18.8	3.78551	13.7897	0.000216963	0.0157698	0.299626	18.8	1.27678	2.42297	0.151687	0.993871	1	23.8	4.25673	19.1163	3.0725e-05	0.00235729	0.0424312	23.8	1.74799	3.35891	0.0490147	0.918974	1	23.8	0.471215	1.38628	0.589716	0.993629	1
f__Lachnospiraceae, 339229	9.6	2.9197	7.56687	0.016732	0.745382	1	13.2	3.53658	11.6043	0.00359239	0.183744	1	13.2	0.616888	1.53356	0.55302	0.993871	1	13.4	3.54971	11.7103	0.00350026	0.134274	1	13.4	0.630015	1.54758	0.545112	0.963978	1	13.4	0.0131267	1.00914	0.989875	0.998551	1
o__RF39, 1108356	0.8	-2.94688	-7.7108	0.1535	0.786005	1	0.8	-2.81245	-7.02476	0.17671	0.76967	1	0	0.134432	1.09766	0.959578	0.993871	1	0.8	-2.54989	-5.85592	0.199126	0.739844	1	0	0.396985	1.31675	0.877607	0.963978	1	0	0.262553	1.1996	0.919302	0.993629	1
o__Clostridiales, 1108078	2.2	1.56999	2.96903	0.202707	0.786005	1	0.6	-2.42854	-5.38348	0.257012	0.76967	1	2.2	-3.99853	-15.9837	0.0496783	0.993871	1	0.6	-2.17037	-4.50139	0.290121	0.749455	1	2.2	-3.74036	-13.3648	0.0540301	0.918974	1	0	0.258169	1.19596	0.92137	0.993629	1
o__Clostridiales, 1106614	3901.4	-0.879147	-1.83929	0.0716498	0.786005	1	3901.4	-1.32067	-2.49782	0.00682033	0.313963	1	2571	-0.441522	-1.35804	0.365793	0.993871	1	3901.4	-1.56838	-2.96571	0.00131618	0.0649161	1	2571	-0.68923	-1.61242	0.158085	0.918974	1	1696	-0.247708	-1.18732	0.612007	0.993629	1
g__Oscillospira, 1105687	0.4	-2.08233	-4.23491	0.298858	0.786005	1	0.4	-1.94675	-3.85506	0.335611	0.76967	1	0	0.135578	1.09853	0.957326	0.993871	1	0.4	-1.68923	-3.22484	0.379911	0.794631	1	0	0.393102	1.31321	0.872847	0.963978	1	0	0.257525	1.19543	0.916978	0.993629	1
f__Rikenellaceae, 953855	3.8	4.94939	30.8969	0.0481009	0.786005	1	1.8	4.03591	16.4033	0.111054	0.76967	1	3.8	-0.91348	-1.88358	0.528304	0.993871	1	3.8	5.34355	40.604	0.0326993	0.5472	1	3.8	0.394158	1.31418	0.777366	0.963978	1	3.8	1.30764	2.47536	0.365426	0.993629	1
f__Ruminococcaceae, 837859	2.6	-1.48453	-2.79827	0.272245	0.786005	1	2.6	-0.189656	-1.14049	0.880626	0.946826	1	2.2	1.29488	2.45356	0.339916	0.993871	1	2.6	-0.167775	-1.12332	0.894692	0.942464	1	2	1.31676	2.49106	0.333336	0.918974	1	2.2	0.0218812	1.01528	0.986281	0.998551	1
o__Clostridiales, 831922	18.8	0.914657	1.88512	0.316576	0.786005	1	18.8	1.00086	2.00119	0.273488	0.76967	1	18.8	0.0862019	1.06157	0.923334	0.993871	1	12.2	0.708926	1.63459	0.440372	0.804533	1	18.8	-0.205731	-1.15327	0.819322	0.963978	1	18.8	-0.291933	-1.22428	0.746037	0.993629	1
o__Clostridiales, 830014	2.8	-2.72615	-6.61688	0.0505808	0.786005	1	2.8	-1.2025	-2.30138	0.316566	0.76967	1	1.2	1.52366	2.87519	0.295207	0.993871	1	2.8	-1.71023	-3.27214	0.177415	0.739844	1	0.8	1.01592	2.02219	0.501538	0.963978	1	1.2	-0.507737	-1.42182	0.703692	0.993629	1
f__Lachnospiraceae, 759751	3	-2.57849	-5.97314	0.0741441	0.786005	1	3	-2.48756	-5.6083	0.0879022	0.76967	1	0.4	0.0909252	1.06505	0.956284	0.993871	1	3	-1.88687	-3.69832	0.168985	0.739844	1	0.6	0.691618	1.61509	0.662338	0.963978	1	0.6	0.600693	1.51644	0.706688	0.993629	1
f__S24-7, 741001	0.6	-2.63025	-6.19134	0.201109	0.786005	1	0.6	-2.49546	-5.63906	0.229019	0.76967	1	0	0.134796	1.09794	0.959052	0.993871	1	0.6	-2.23452	-4.70605	0.258768	0.739844	1	0	0.395734	1.31561	0.876686	0.963978	1	0	0.260938	1.19826	0.918943	0.993629	1
g__Anaerofustis, 727945	0.4	-2.0721	-4.20497	0.32866	0.786005	1	0.4	-1.9368	-3.82855	0.364905	0.771807	1	0	0.135297	1.09832	0.958883	0.993871	1	0.6	0.645059	1.5638	0.639632	0.90078	1	0.6	2.71716	6.57575	0.185718	0.918974	1	0.6	2.58186	5.9871	0.21232	0.993629	1
o__Clostridiales, 661055	4.2	3.11036	8.636	0.0794358	0.786005	1	3	2.78524	6.89352	0.118997	0.76967	1	4.2	-0.325122	-1.25277	0.824467	0.993871	1	1.6	2.23212	4.69825	0.218305	0.739844	1	4.2	-0.878241	-1.83813	0.557731	0.963978	1	3	-0.553119	-1.46725	0.714823	0.993629	1
f__Lachnospiraceae, 584137	0.4	-2.08226	-4.2347	0.31207	0.786005	1	0.4	-1.94668	-3.85487	0.348547	0.76967	1	0	0.135578	1.09853	0.95804	0.993871	1	0.4	0.215692	1.16126	0.873437	0.936882	1	0.4	2.29795	4.91759	0.259958	0.918974	1	0.4	2.16237	4.47651	0.293132	0.993629	1
s__distasonis, 577294	0.4	2.31936	4.9911	0.308111	0.786005	1	0	0.437342	1.35411	0.874267	0.946826	1	0.4	-1.88201	-3.68589	0.348504	0.993871	1	0	0.694867	1.61874	0.796381	0.90078	1	0.4	-1.62449	-3.08333	0.394729	0.918974	1	0	0.257525	1.19543	0.916978	0.993629	1
g__Oscillospira, 443620	1.2	-3.42171	-10.7161	0.0922642	0.786005	1	1.2	-1.22817	-2.3427	0.350858	0.76967	1	0.4	2.19354	4.57426	0.304796	0.993871	1	1.2	-3.02727	-8.15263	0.121211	0.739844	1	0	0.394446	1.31444	0.878447	0.963978	1	0.4	-1.79909	-3.48001	0.383072	0.993629	1
g__Sutterella, 437137	1590.8	-0.761607	-1.69538	0.309676	0.786005	1	1590.8	-1.18974	-2.28111	0.112578	0.76967	1	988.8	-0.428131	-1.34549	0.568048	0.993871	1	1590.8	-1.46096	-2.75291	0.0514014	0.663414	1	988.8	-0.699349	-1.62377	0.351099	0.918974	1	674.6	-0.271219	-1.20683	0.717681	0.993629	1
f__S24-7, 430194	3.4	-1.94003	-3.83713	0.15437	0.786005	1	3.8	0.298129	1.22955	0.80838	0.946826	1	3.8	2.23816	4.71794	0.0971906	0.993871	1	3.4	0.0117607	1.00819	0.992451	0.995334	1	2.6	1.95179	3.86854	0.151826	0.918974	1	3.8	-0.286368	-1.21957	0.815768	0.993629	1
f__F16, 401717	571	-0.968868	-1.9573	0.150913	0.786005	1	571	-1.20571	-2.30651	0.0739852	0.76967	1	414.4	-0.236842	-1.17841	0.725739	0.993871	1	571	-1.4946	-2.81786	0.0268579	0.526115	1	414.4	-0.525731	-1.43966	0.436417	0.918974	1	319.6	-0.288889	-1.2217	0.669029	0.993629	1
g__Dorea, 400739	2	4.26116	19.1751	0.0740306	0.786005	1	2	4.36448	20.5987	0.0674873	0.76967	1	2	0.103322	1.07424	0.932149	0.993871	1	2.8	4.94136	30.7253	0.037411	0.577206	1	2.8	0.680198	1.60236	0.56699	0.963978	1	2.8	0.576876	1.49162	0.628303	0.993629	1
f__Ruminococcaceae, 375106	30.2	-0.953237	-1.93621	0.154019	0.786005	1	30.2	-1.36752	-2.58026	0.0436066	0.76967	1	17.6	-0.414279	-1.33263	0.545065	0.993871	1	30.2	-1.7926	-3.46438	0.00935335	0.269104	1	17.6	-0.839359	-1.78926	0.22816	0.918974	1	11.8	-0.42508	-1.34265	0.546621	0.993629	1
g__Oscillospira, 373923	0.4	2.31936	4.9911	0.308111	0.786005	1	0	0.437342	1.35411	0.874267	0.946826	1	0.4	-1.88201	-3.68589	0.348504	0.993871	1	0	0.694867	1.61874	0.796381	0.90078	1	0.4	-1.62449	-3.08333	0.394729	0.918974	1	0	0.257525	1.19543	0.916978	0.993629	1
o__Clostridiales, 356404	0.6	-2.55691	-5.88446	0.209069	0.786005	1	0.6	-2.42162	-5.35771	0.238095	0.76967	1	0	0.135294	1.09832	0.958545	0.993871	1	0.6	-2.16286	-4.47801	0.268944	0.739844	1	0	0.394051	1.31408	0.876117	0.963978	1	0	0.258757	1.19645	0.918904	0.993629	1
o__Clostridiales, 356353	0.4	-2.08256	-4.23557	0.298798	0.786005	1	0.4	-1.94698	-3.85566	0.335547	0.76967	1	0	0.135578	1.09853	0.957326	0.993871	1	0.4	-1.68945	-3.22534	0.379839	0.794631	1	0	0.393102	1.31321	0.872847	0.963978	1	0	0.257525	1.19543	0.916978	0.993629	1
f__Lachnospiraceae, 355771	0.4	2.3196	4.99192	0.308055	0.786005	1	0	0.437342	1.35411	0.874267	0.946826	1	0.4	-1.88225	-3.6865	0.348435	0.993871	1	0	0.694867	1.61874	0.796381	0.90078	1	0.4	-1.62473	-3.08384	0.394652	0.918974	1	0	0.257525	1.19543	0.916978	0.993629	1
f__S24-7, 355746	12	1.05627	2.07955	0.243392	0.786005	1	12.6	1.34601	2.54207	0.136331	0.76967	1	12.6	0.289738	1.22242	0.739749	0.993871	1	10	1.14314	2.20861	0.208175	0.739844	1	12	0.0868716	1.06206	0.921098	0.973994	1	12.6	-0.202867	-1.15098	0.816682	0.993629	1
o__Clostridiales, 355187	0.8	-3.46161	-11.0167	0.0984878	0.786005	1	0.8	-3.32814	-10.0431	0.115125	0.76967	1	0	0.133478	1.09694	0.960603	0.993871	1	0.8	-3.06129	-8.34718	0.128952	0.739844	1	0	0.400326	1.31981	0.878917	0.963978	1	0	0.266848	1.20318	0.919535	0.993629	1
o__Clostridiales, 355097	0.4	2.3196	4.99192	0.308055	0.786005	1	0	0.437342	1.35411	0.874267	0.946826	1	0.4	-1.88225	-3.6865	0.348435	0.993871	1	0	0.694867	1.61874	0.796381	0.90078	1	0.4	-1.62473	-3.08384	0.394652	0.918974	1	0	0.257525	1.19543	0.916978	0.993629	1
g__Lactobacillus, 354905	117	1.82579	3.545	0.0307744	0.786005	1	211.6	2.75643	6.75721	0.00109764	0.0721831	1	211.6	0.930643	1.90613	0.266579	0.993871	1	320	3.56295	11.8183	2.4261e-05	0.00197085	0.0335045	320	1.73716	3.33378	0.0379962	0.918974	1	320	0.806517	1.74898	0.334896	0.993629	1
g__Oscillospira, 353131	0.4	2.3193	4.99089	0.308125	0.786005	1	0	0.437342	1.35411	0.874267	0.946826	1	0.4	-1.88196	-3.68574	0.348521	0.993871	1	0	0.694867	1.61874	0.796381	0.90078	1	0.4	-1.62443	-3.0832	0.394749	0.918974	1	0	0.257525	1.19543	0.916978	0.993629	1
o__Clostridiales, 351593	4.8	2.49996	5.65668	0.108528	0.786005	1	1.8	1.13221	2.19195	0.483099	0.905237	1	4.8	-1.36774	-2.58066	0.342462	0.993871	1	1.6	1.31728	2.49196	0.413205	0.79601	1	4.8	-1.18268	-2.26997	0.410066	0.918974	1	1.8	0.185066	1.13687	0.901608	0.993629	1
o__Clostridiales, 350381	1	3.40984	10.6283	0.130958	0.786005	1	0	0.437342	1.35411	0.876919	0.946826	1	1	-2.9725	-7.84895	0.134279	0.993871	1	0	0.694867	1.61874	0.800876	0.90078	1	1	-2.71497	-6.56582	0.149997	0.918974	1	0	0.257525	1.19543	0.919132	0.993629	1
o__Clostridiales, 350188	0.8	-2.93692	-7.65777	0.131833	0.786005	1	0.8	-2.80135	-6.97091	0.154351	0.76967	1	0	0.135578	1.09853	0.957828	0.993871	1	0.8	-2.54382	-5.83132	0.172875	0.739844	1	0	0.393102	1.31321	0.874441	0.963978	1	0	0.257525	1.19543	0.918009	0.993629	1
o__Clostridiales, 350127	209.6	-0.863967	-1.82004	0.323841	0.786005	1	209.6	-1.13005	-2.18867	0.197144	0.76967	1	196.8	-0.266084	-1.20254	0.761493	0.993871	1	209.6	-1.07755	-2.11045	0.218814	0.739844	1	196.8	-0.213585	-1.15957	0.807532	0.963978	1	149.4	0.052499	1.03706	0.952278	0.997082	1
f__Ruminococcaceae, 349862	0.4	2.31951	4.99162	0.308075	0.786005	1	0	0.437342	1.35411	0.874267	0.946826	1	0.4	-1.88217	-3.68628	0.34846	0.993871	1	0	0.694867	1.61874	0.796381	0.90078	1	0.4	-1.62464	-3.08366	0.39468	0.918974	1	0	0.257525	1.19543	0.916978	0.993629	1
f__S24-7, 348821	0.4	-2.08245	-4.23525	0.298827	0.786005	1	0.4	-1.94687	-3.85537	0.335578	0.76967	1	0	0.135578	1.09853	0.957326	0.993871	1	0.4	-1.68934	-3.2251	0.379874	0.794631	1	0	0.393102	1.31321	0.872847	0.963978	1	0	0.257525	1.19543	0.916978	0.993629	1
o__Clostridiales, 348659	0.6	-2.55427	-5.87372	0.229493	0.786005	1	0.8	0.40388	1.32306	0.763186	0.946826	1	0.8	2.95815	7.77129	0.156325	0.993871	1	0.8	0.555383	1.46956	0.677003	0.90078	1	0.8	3.10966	8.63177	0.135322	0.918974	1	0.8	0.151503	1.11073	0.905081	0.993629	1
f__Lachnospiraceae, 347908	0.4	-2.08245	-4.23525	0.298827	0.786005	1	0.4	-1.94687	-3.85537	0.335578	0.76967	1	0	0.135578	1.09853	0.957326	0.993871	1	0.4	-1.68934	-3.2251	0.379874	0.794631	1	0	0.393102	1.31321	0.872847	0.963978	1	0	0.257525	1.19543	0.916978	0.993629	1
f__Ruminococcaceae, 346804	2.4	-4.22572	-18.7098	0.0469401	0.786005	1	2.4	-0.28586	-1.21914	0.819516	0.946826	1	1.6	3.93986	15.3468	0.064865	0.993871	1	2.4	-1.14719	-2.21482	0.391439	0.794631	1	0.8	3.07853	8.44754	0.158947	0.918974	1	1.6	-0.861331	-1.81671	0.523459	0.993629	1
o__Clostridiales, 345860	0.6	2.75865	6.76763	0.242532	0.786005	1	1	3.54325	11.658	0.126187	0.76967	1	1	0.784596	1.72261	0.526962	0.993871	1	0	0.69579	1.61977	0.80395	0.90078	1	0.6	-2.06286	-4.17814	0.303925	0.918974	1	1	-2.84746	-7.19731	0.145275	0.993629	1
f__Lachnospiraceae, 345709	2.8	4.76314	27.1549	0.0461091	0.786005	1	1.2	3.942	15.3695	0.103083	0.76967	1	2.8	-0.821146	-1.76681	0.510984	0.993871	1	1.8	4.35557	20.4718	0.0703123	0.739844	1	2.8	-0.407573	-1.32645	0.739634	0.963978	1	1.8	0.413574	1.33198	0.747348	0.993629	1
g__Oscillospira, 345582	0.4	-2.08703	-4.24872	0.319897	0.786005	1	0.4	-1.95152	-3.86783	0.356085	0.76967	1	0	0.135502	1.09847	0.958558	0.993871	1	0.4	0.210966	1.15746	0.881218	0.937057	1	0.4	2.29799	4.91773	0.268971	0.918974	1	0.4	2.16249	4.47687	0.302069	0.993629	1
f__Ruminococcaceae, 344906	1.2	-3.3911	-10.4912	0.109624	0.786005	1	1.2	-0.0364163	-1.02556	0.977447	0.986238	1	1	3.35469	10.2297	0.113253	0.993871	1	1.2	-1.09876	-2.14171	0.447009	0.80907	1	0.4	2.29234	4.8985	0.301157	0.918974	1	1	-1.06235	-2.08833	0.461582	0.993629	1
f__Ruminococcaceae, 344527	10.2	-1.69206	-3.23118	0.0651164	0.786005	1	10.2	-1.14908	-2.21773	0.202461	0.76967	1	4.8	0.54298	1.45698	0.56494	0.993871	1	10.2	-1.39057	-2.62182	0.128826	0.739844	1	3.8	0.301494	1.23242	0.752707	0.963978	1	4.8	-0.241487	-1.18221	0.797621	0.993629	1
f__Ruminococcaceae, 344329	16.6	-1.64087	-3.11853	0.116931	0.786005	1	16.6	-1.9128	-3.76538	0.070654	0.76967	1	6.4	-0.27193	-1.20742	0.800891	0.993871	1	16.6	-1.48958	-2.80808	0.155774	0.739844	1	6.4	0.151283	1.11056	0.887534	0.967391	1	6	0.423212	1.34091	0.695423	0.993629	1
o__Clostridiales, 344256	2.6	1.62879	3.09253	0.197245	0.786005	1	2.4	1.53898	2.9059	0.227104	0.76967	1	2.6	-0.0898057	-1.06423	0.935883	0.993871	1	3	1.9438	3.84718	0.123236	0.739844	1	3	0.315013	1.24402	0.774883	0.963978	1	3	0.404819	1.32392	0.716321	0.993629	1
o__Clostridiales, 344117	0.6	2.79838	6.95658	0.226406	0.786005	1	0	0.437111	1.35389	0.877431	0.946826	1	0.6	-2.36127	-5.13822	0.248942	0.993871	1	0	0.697128	1.62127	0.800943	0.90078	1	0.6	-2.10125	-4.29081	0.281507	0.918974	1	0	0.260017	1.19749	0.918693	0.993629	1
f__Lachnospiraceae, 342429	1	3.3809	10.4172	0.156879	0.786005	1	0.4	2.43869	5.42151	0.325043	0.76967	1	1	-0.942202	-1.92146	0.51546	0.993871	1	0.8	3.38475	10.4451	0.159022	0.739844	1	1	0.00385458	1.00268	0.997665	0.998388	1	0.8	0.946056	1.9266	0.520832	0.993629	1
o__Clostridiales, 342105	1.8	-1.19225	-2.28509	0.319501	0.786005	1	2	0.167851	1.12338	0.877081	0.946826	1	2	1.3601	2.56703	0.250203	0.993871	1	4	1.20336	2.30275	0.247434	0.739844	1	4	2.39561	5.26199	0.0359111	0.918974	1	4	1.03551	2.04983	0.311587	0.993629	1
o__Clostridiales, 340650	0.4	2.3193	4.99089	0.308125	0.786005	1	0	0.437342	1.35411	0.874267	0.946826	1	0.4	-1.88196	-3.68574	0.348521	0.993871	1	0	0.694867	1.61874	0.796381	0.90078	1	0.4	-1.62443	-3.0832	0.394749	0.918974	1	0	0.257525	1.19543	0.916978	0.993629	1
o__Clostridiales, 340162	0.4	2.31936	4.9911	0.308111	0.786005	1	0	0.437342	1.35411	0.874267	0.946826	1	0.4	-1.88201	-3.68589	0.348504	0.993871	1	0	0.694867	1.61874	0.796381	0.90078	1	0.4	-1.62449	-3.08333	0.394729	0.918974	1	0	0.257525	1.19543	0.916978	0.993629	1
o__Clostridiales, 339886	3.4	1.79521	3.47065	0.169721	0.786005	1	1.4	0.877785	1.83755	0.51888	0.94162	1	3.4	-0.917422	-1.88874	0.448674	0.993871	1	1	0.481252	1.39595	0.73112	0.90078	1	3.4	-1.31395	-2.48622	0.295258	0.918974	1	1.4	-0.396533	-1.31634	0.762269	0.993629	1
f__S24-7, 339156	10.8	1.15028	2.21956	0.232818	0.786005	1	7.6	0.618423	1.5352	0.526638	0.945836	1	10.8	-0.531852	-1.44578	0.572493	0.993871	1	7.8	0.866112	1.82274	0.373756	0.794631	1	10.8	-0.284163	-1.2177	0.76224	0.963978	1	7.8	0.247689	1.1873	0.794779	0.993629	1
g__Ruminococcus, 339031	0.4	-2.08226	-4.2347	0.298878	0.786005	1	0.4	-1.94668	-3.85487	0.335631	0.76967	1	0	0.135578	1.09853	0.957326	0.993871	1	0.4	-1.68916	-3.22468	0.379934	0.794631	1	0	0.393102	1.31321	0.872847	0.963978	1	0	0.257525	1.19543	0.916978	0.993629	1
g__Dorea, 338926	9.6	2.00506	4.01405	0.114068	0.786005	1	13	2.57814	5.97171	0.0413377	0.76967	1	13	0.573085	1.4877	0.628579	0.993871	1	17.2	3.16112	8.94521	0.0120753	0.319242	1	17.2	1.15606	2.22848	0.327296	0.918974	1	17.2	0.582972	1.49793	0.619673	0.993629	1
g__Ruminococcus, 338640	0.8	-2.86651	-7.29297	0.172301	0.786005	1	0.8	-0.64674	-1.56563	0.647506	0.946826	1	0.4	2.21977	4.65818	0.304594	0.993871	1	0.8	-2.46935	-5.53793	0.222194	0.739844	1	0	0.39716	1.31691	0.878648	0.963978	1	0.4	-1.82261	-3.5372	0.382517	0.993629	1
g__Adlercreutzia, 338553	0.6	2.70952	6.54105	0.274	0.786005	1	0.6	2.82512	7.08672	0.25482	0.76967	1	0.6	0.115595	1.08342	0.939668	0.993871	1	1.4	4.07393	16.8413	0.0910054	0.739844	1	1.4	1.36441	2.57471	0.333157	0.918974	1	1.4	1.24881	2.37646	0.37811	0.993629	1
f__[Mogibacteriaceae], 337784	1	3.28072	9.71841	0.178424	0.786005	1	2.2	4.502	22.6589	0.0599984	0.76967	1	2.2	1.22128	2.33154	0.349957	0.993871	1	3.6	5.19536	36.6403	0.029023	0.526115	1	3.6	1.91464	3.7702	0.134991	0.918974	1	3.6	0.693356	1.61704	0.561528	0.993629	1
o__Clostridiales, 336817	0.4	2.3196	4.99192	0.308055	0.786005	1	0	0.437342	1.35411	0.874267	0.946826	1	0.4	-1.88225	-3.6865	0.348435	0.993871	1	0	0.694867	1.61874	0.796381	0.90078	1	0.4	-1.62473	-3.08384	0.394652	0.918974	1	0	0.257525	1.19543	0.916978	0.993629	1
g__Oscillospira, 336810	6.8	-1.36968	-2.58413	0.244511	0.786005	1	6.8	-1.42297	-2.68137	0.230832	0.76967	1	2.6	-0.0532881	-1.03763	0.965247	0.993871	1	6.8	-2.72979	-6.63357	0.0369288	0.577206	1	2.6	-1.36011	-2.56704	0.310305	0.918974	1	2.4	-1.30682	-2.47395	0.333009	0.993629	1
o__Clostridiales, 336145	0.8	3.03696	8.20758	0.206757	0.786005	1	0.8	3.14289	8.83295	0.192093	0.76967	1	0.8	0.105937	1.07619	0.938221	0.993871	1	0	0.701677	1.62639	0.806004	0.90078	1	0.8	-2.33528	-5.04649	0.255976	0.918974	1	0.8	-2.44122	-5.431	0.236097	0.993629	1
f__Lachnospiraceae, 335965	0.6	2.84077	7.16404	0.22319	0.786005	1	0	0.437042	1.35383	0.878231	0.946826	1	0.6	-2.40373	-5.2917	0.245273	0.993871	1	0	0.697818	1.62205	0.802058	0.90078	1	0.6	-2.14296	-4.41666	0.277349	0.918974	1	0	0.260776	1.19812	0.919085	0.993629	1
o__Clostridiales, 335401	0.4	-2.08233	-4.23491	0.298858	0.786005	1	0.4	-1.94675	-3.85506	0.335611	0.76967	1	0	0.135578	1.09853	0.957326	0.993871	1	0.4	-1.68923	-3.22484	0.379911	0.794631	1	0	0.393102	1.31321	0.872847	0.963978	1	0	0.257525	1.19543	0.916978	0.993629	1
o__Clostridiales, 335267	0.8	-2.93692	-7.65777	0.157148	0.786005	1	1.8	1.10786	2.15526	0.338968	0.76967	1	1.8	4.04479	16.5045	0.0443087	0.993871	1	0.8	-0.638792	-1.55703	0.643003	0.90078	1	0.4	2.29813	4.91821	0.284037	0.918974	1	1.8	-1.74665	-3.3558	0.171886	0.993629	1
o__Clostridiales, 333351	0.4	-2.08245	-4.23525	0.298827	0.786005	1	0.4	-1.94687	-3.85537	0.335578	0.76967	1	0	0.135578	1.09853	0.957326	0.993871	1	0.4	-1.68934	-3.2251	0.379874	0.794631	1	0	0.393102	1.31321	0.872847	0.963978	1	0	0.257525	1.19543	0.916978	0.993629	1
g__Lactobacillus, 333178	7.8	2.6744	6.38373	0.0276081	0.786005	1	12.4	3.28165	9.72467	0.00658887	0.313963	1	12.4	0.607249	1.52335	0.563363	0.993871	1	11	3.31534	9.95444	0.00609524	0.191307	1	11	0.64094	1.55934	0.542351	0.963978	1	12.4	0.0336907	1.02363	0.974276	0.997082	1
f__Lachnospiraceae, 333053	0.8	3.2507	9.51829	0.165741	0.786005	1	0	0.436779	1.35358	0.879749	0.946826	1	0.8	-2.81392	-7.03195	0.176693	0.993871	1	0	0.700541	1.62511	0.803696	0.90078	1	0.8	-2.55016	-5.857	0.19922	0.918974	1	0	0.263762	1.20061	0.919317	0.993629	1
g__Oscillospira, 332608	0.4	2.31951	4.99162	0.308075	0.786005	1	0	0.437342	1.35411	0.874267	0.946826	1	0.4	-1.88217	-3.68628	0.34846	0.993871	1	0	0.694867	1.61874	0.796381	0.90078	1	0.4	-1.62464	-3.08366	0.39468	0.918974	1	0	0.257525	1.19543	0.916978	0.993629	1
o__Clostridiales, 332475	0.6	-2.63025	-6.19134	0.200947	0.786005	1	0.6	-2.49546	-5.63906	0.228854	0.76967	1	0	0.134796	1.09794	0.959043	0.993871	1	0.6	-2.23452	-4.70605	0.258582	0.739844	1	0	0.395734	1.31561	0.876657	0.963978	1	0	0.260938	1.19826	0.918924	0.993629	1
f__Ruminococcaceae, 331737	28.4	-1.20493	-2.30526	0.194531	0.786005	1	28.4	-1.13948	-2.20302	0.22051	0.76967	1	13	0.0654466	1.04641	0.944445	0.993871	1	28.4	-1.51505	-2.85809	0.106392	0.739844	1	13	-0.310121	-1.23981	0.743406	0.963978	1	11.2	-0.375568	-1.29735	0.692168	0.993629	1
o__Clostridiales, 331491	1	3.4236	10.7301	0.140699	0.786005	1	0	0.437114	1.35389	0.879282	0.946826	1	1	-2.98648	-7.92539	0.146851	0.993871	1	0.4	2.60094	6.06682	0.280345	0.745965	1	1	-0.822655	-1.76866	0.535119	0.963978	1	0.4	2.16383	4.48102	0.315217	0.993629	1
g__Lactobacillus, 331248	0.4	2.31344	4.97066	0.325208	0.786005	1	0.4	2.49048	5.61964	0.289282	0.76967	1	0.4	0.17704	1.13056	0.898071	0.993871	1	0	0.695462	1.6194	0.800852	0.90078	1	0.4	-1.61797	-3.06944	0.417841	0.918974	1	0.4	-1.79501	-3.47019	0.368373	0.993629	1
o__Clostridiales, 330064	0.4	2.31936	4.9911	0.308111	0.786005	1	0	0.437342	1.35411	0.874267	0.946826	1	0.4	-1.88201	-3.68589	0.348504	0.993871	1	0	0.694867	1.61874	0.796381	0.90078	1	0.4	-1.62449	-3.08333	0.394729	0.918974	1	0	0.257525	1.19543	0.916978	0.993629	1
g__Oscillospira, 327808	123.8	-1.12742	-2.18468	0.179212	0.786005	1	123.8	-1.56204	-2.95271	0.0634433	0.76967	1	61.2	-0.434619	-1.35155	0.60638	0.993871	1	123.8	-1.94022	-3.83765	0.0215571	0.472545	1	61.2	-0.812803	-1.75662	0.336789	0.918974	1	40	-0.378184	-1.29971	0.655772	0.993629	1
f__S24-7, 326095	2.6	1.34953	2.54828	0.30892	0.786005	1	1	-2.98337	-7.90833	0.176558	0.76967	1	2.6	-4.3329	-20.1527	0.0429868	0.993871	1	1	0.225023	1.1688	0.87344	0.936882	1	2.6	-1.1245	-2.18026	0.389252	0.918974	1	1	3.2084	9.24323	0.143913	0.993629	1
o__RF32, 325850	0.8	3.04878	8.27512	0.200375	0.786005	1	0.6	2.83375	7.12926	0.239814	0.76967	1	0.8	-0.215027	-1.16073	0.875168	0.993871	1	0	0.700458	1.62502	0.805015	0.90078	1	0.8	-2.34832	-5.09232	0.246883	0.918974	1	0.6	-2.1333	-4.38718	0.301083	0.993629	1
g__Lactobacillus, 324926	1.2	3.78523	13.7869	0.109324	0.786005	1	2.2	4.69718	25.9414	0.0446065	0.76967	1	2.2	0.911958	1.8816	0.430014	0.993871	1	7.2	6.49756	90.3568	0.00496668	0.175871	1	7.2	2.71234	6.55382	0.0138708	0.918974	1	7.2	1.80038	3.48312	0.0856279	0.993629	1
o__Clostridiales, 324015	0.4	-2.08233	-4.23491	0.298858	0.786005	1	0.4	-1.94675	-3.85506	0.335611	0.76967	1	0	0.135578	1.09853	0.957326	0.993871	1	0.4	-1.68923	-3.22484	0.379911	0.794631	1	0	0.393102	1.31321	0.872847	0.963978	1	0	0.257525	1.19543	0.916978	0.993629	1
o__Clostridiales, 323595	2.6	2.37746	5.1962	0.100804	0.786005	1	0.4	0.128098	1.09285	0.93858	0.97244	1	2.6	-2.24936	-4.75472	0.111968	0.993871	1	0.6	0.629092	1.54659	0.69431	0.90078	1	2.6	-1.74836	-3.35977	0.192698	0.918974	1	0.6	0.500994	1.41519	0.7497	0.993629	1
g__Oscillospira, 323403	1.2	3.64452	12.5058	0.112071	0.786005	1	0.4	2.47868	5.57388	0.300771	0.76967	1	1.2	-1.16584	-2.24364	0.36279	0.993871	1	0	0.694867	1.61874	0.803688	0.90078	1	1.2	-2.94965	-7.72564	0.126056	0.918974	1	0.4	-1.78381	-3.44335	0.383757	0.993629	1
g__Lactobacillus, 322723	2.8	4.9147	30.1628	0.0358924	0.786005	1	5.8	6.13425	70.2412	0.0083966	0.374055	1	5.8	1.21955	2.32873	0.249898	0.993871	1	10.6	6.9963	127.672	0.00258334	0.108109	1	10.6	2.0816	4.23277	0.0468915	0.918974	1	10.6	0.862057	1.81763	0.394965	0.993629	1
s__gnavus, 322112	0.4	2.31951	4.99162	0.308075	0.786005	1	0	0.437342	1.35411	0.874267	0.946826	1	0.4	-1.88217	-3.68628	0.34846	0.993871	1	0	0.694867	1.61874	0.796381	0.90078	1	0.4	-1.62464	-3.08366	0.39468	0.918974	1	0	0.257525	1.19543	0.916978	0.993629	1
o__Clostridiales, 321821	35.6	-1.01669	-2.02327	0.284997	0.786005	1	35.6	-1.39847	-2.63622	0.143548	0.76967	1	21.4	-0.381785	-1.30295	0.691044	0.993871	1	35.6	-1.93747	-3.83033	0.0447795	0.618405	1	21.4	-0.920781	-1.89314	0.342475	0.918974	1	13.4	-0.538997	-1.45296	0.580403	0.993629	1
o__Clostridiales, 320490	0.8	-2.8542	-7.23103	0.162051	0.786005	1	0.8	-2.7194	-6.58597	0.186491	0.76967	1	0	0.134807	1.09795	0.959099	0.993871	1	0.8	-2.4585	-5.49646	0.210168	0.739844	1	0	0.3957	1.31558	0.876859	0.963978	1	0	0.260893	1.19822	0.919062	0.993629	1
o__Clostridiales, 319909	0.4	-2.1198	-4.34634	0.317078	0.786005	1	0.4	0.0406665	1.02859	0.977668	0.986238	1	0.4	2.16047	4.4706	0.306076	0.993871	1	0.4	-1.72592	-3.3079	0.398272	0.794631	1	0	0.393886	1.31393	0.877407	0.963978	1	0.4	-1.76658	-3.40247	0.385342	0.993629	1
f__Lachnospiraceae, 319378	0.4	-2.08245	-4.23525	0.298827	0.786005	1	0.4	-1.94687	-3.85537	0.335578	0.76967	1	0	0.135578	1.09853	0.957326	0.993871	1	0.4	-1.68934	-3.2251	0.379874	0.794631	1	0	0.393102	1.31321	0.872847	0.963978	1	0	0.257525	1.19543	0.916978	0.993629	1
f__Ruminococcaceae, 318370	1.4	-1.59656	-3.02421	0.261823	0.786005	1	1.4	-1.41503	-2.66665	0.318814	0.76967	1	0.4	0.181533	1.13409	0.908459	0.993871	1	1.4	-3.24051	-9.45125	0.109967	0.739844	1	0.4	-1.64395	-3.1252	0.442797	0.918974	1	0.4	-1.82548	-3.54425	0.393588	0.993629	1
g__Oscillospira, 316925	0.4	-2.08226	-4.2347	0.314441	0.786005	1	0.4	-1.94668	-3.85487	0.350863	0.76967	1	0	0.135578	1.09853	0.958169	0.993871	1	0.4	0.215886	1.16142	0.87473	0.936882	1	0.4	2.29814	4.91825	0.262262	0.918974	1	0.4	2.16257	4.47711	0.295418	0.993629	1
o__Clostridiales, 315896	0.4	-2.08226	-4.2347	0.311926	0.786005	1	0.4	-1.94668	-3.85487	0.348405	0.76967	1	0	0.135578	1.09853	0.958032	0.993871	1	0.4	0.215692	1.16126	0.87335	0.936882	1	0.4	2.29795	4.91759	0.259815	0.918974	1	0.4	2.16237	4.47651	0.29299	0.993629	1
o__Clostridiales, 314963	3.2	-2.19982	-4.59422	0.0682496	0.786005	1	3.2	-0.909168	-1.87796	0.41107	0.816927	1	2	1.29065	2.44639	0.298388	0.993871	1	3.2	-1.58788	-3.00607	0.17376	0.739844	1	1.2	0.611941	1.52831	0.636826	0.963978	1	2	-0.678711	-1.60071	0.572682	0.993629	1
o__Clostridiales, 314359	3.2	4.80306	27.9168	0.0450288	0.786005	1	7.6	6.09116	68.1747	0.0104781	0.432379	1	7.6	1.2881	2.44207	0.271744	0.993871	1	6.8	6.07792	67.5518	0.010689	0.295231	1	6.8	1.27486	2.41976	0.277763	0.918974	1	7.6	-0.0132417	-1.00922	0.990736	0.99869	1
g__Oscillospira, 313274	0.6	-2.53694	-5.80355	0.221532	0.786005	1	0.6	-0.37224	-1.29436	0.788521	0.946826	1	0.4	2.1647	4.48372	0.306295	0.993871	1	0.6	-2.14258	-4.4155	0.283524	0.747743	1	0	0.394359	1.31436	0.877474	0.963978	1	0.4	-1.77034	-3.41133	0.385523	0.993629	1
f__S24-7, 313130	1.4	-3.85421	-14.4622	0.0816192	0.786005	1	1.4	-1.00937	-2.01303	0.497579	0.924841	1	0.6	2.84485	7.18429	0.209426	0.993871	1	1.4	-1.70315	-3.25611	0.288634	0.749455	1	0.4	2.15107	4.44156	0.358986	0.918974	1	0.6	-0.693779	-1.61752	0.679214	0.993629	1
g__Oscillospira, 312719	0.4	2.31965	4.99213	0.308446	0.786005	1	0	0.437342	1.35411	0.874338	0.946826	1	0.4	-1.88231	-3.68665	0.348924	0.993871	1	0	0.694867	1.61874	0.796501	0.90078	1	0.4	-1.62479	-3.08397	0.395187	0.918974	1	0	0.257525	1.19543	0.917035	0.993629	1
g__Oscillospira, 312515	1	3.57957	11.9553	0.136058	0.786005	1	0.8	3.38587	10.4532	0.161885	0.76967	1	1	-0.193705	-1.1437	0.884129	0.993871	1	0	0.702291	1.62709	0.807369	0.90078	1	1	-2.87728	-7.34764	0.160509	0.918974	1	0.8	-2.68358	-6.42447	0.195433	0.993629	1
o__Clostridiales, 311466	1.2	3.75693	13.5191	0.108877	0.786005	1	0	0.436832	1.35363	0.880551	0.946826	1	1.2	-3.32009	-9.9873	0.110413	0.993871	1	0.4	2.67158	6.37128	0.272853	0.741232	1	1.2	-1.08534	-2.12188	0.419995	0.918974	1	0.4	2.23475	4.70682	0.30624	0.993629	1
o__Clostridiales, 310642	0.4	-2.08226	-4.2347	0.298878	0.786005	1	0.4	-1.94668	-3.85487	0.335631	0.76967	1	0	0.135578	1.09853	0.957326	0.993871	1	0.4	-1.68916	-3.22468	0.379934	0.794631	1	0	0.393102	1.31321	0.872847	0.963978	1	0	0.257525	1.19543	0.916978	0.993629	1
o__Clostridiales, 310499	1	3.43623	10.8245	0.152562	0.786005	1	1.2	3.78252	13.761	0.113923	0.76967	1	1.2	0.346291	1.27129	0.78852	0.993871	1	0.8	3.24903	9.50728	0.181068	0.739844	1	1	-0.187195	-1.13855	0.890311	0.969653	1	1.2	-0.533486	-1.44742	0.690736	0.993629	1
f__Lachnospiraceae, 309480	0.8	3.12819	8.7434	0.188392	0.786005	1	0.4	2.45562	5.48549	0.31651	0.76967	1	0.8	-0.672574	-1.59391	0.637984	0.993871	1	0.6	3.04972	8.28054	0.204306	0.739844	1	0.8	-0.0784701	-1.0559	0.953428	0.987956	1	0.6	0.594104	1.50953	0.686004	0.993629	1
f__Ruminococcaceae, 309361	6	-1.76054	-3.38825	0.0998534	0.786005	1	6	-1.42259	-2.68066	0.178519	0.76967	1	2	0.337956	1.26396	0.763896	0.993871	1	6	-2.26514	-4.80702	0.0470843	0.632697	1	1.8	-0.504602	-1.41873	0.675101	0.963978	1	2	-0.842557	-1.79323	0.47996	0.993629	1
g__Oscillospira, 309302	7.4	-1.21783	-2.32597	0.293695	0.786005	1	7.4	-1.52784	-2.88354	0.195851	0.76967	1	3.2	-0.310008	-1.23971	0.79741	0.993871	1	7.4	-2.45354	-5.4776	0.0510237	0.663414	1	3.2	-1.23571	-2.35497	0.33521	0.918974	1	2.2	-0.925702	-1.89961	0.47699	0.993629	1
o__Clostridiales, 309054	2.4	2.15973	4.4683	0.119566	0.786005	1	2	2.09677	4.27751	0.133643	0.76967	1	2.4	-0.0629565	-1.0446	0.954986	0.993871	1	2.2	2.28275	4.86604	0.101465	0.739844	1	2.4	0.123021	1.08901	0.91176	0.971539	1	2.2	0.185977	1.13759	0.868487	0.993629	1
o__Clostridiales, 308308	3	-1.28048	-2.42919	0.32446	0.786005	1	3	-0.611131	-1.52746	0.629291	0.946826	1	2	0.669345	1.59035	0.612811	0.993871	1	3	-0.986827	-1.98182	0.446765	0.80907	1	1.4	0.29365	1.22574	0.828106	0.963978	1	2	-0.375696	-1.29747	0.775972	0.993629	1
s__gnavus, 306914	7.8	2.61502	6.1263	0.0386287	0.786005	1	9.8	3.17464	9.02949	0.0116243	0.432379	1	9.8	0.559628	1.47389	0.607912	0.993871	1	13.6	3.7513	13.4665	0.00274836	0.111632	1	13.6	1.13628	2.19814	0.29477	0.918974	1	13.6	0.576655	1.49139	0.592404	0.993629	1
g__Lactobacillus, 306306	1.4	1.57574	2.98088	0.272916	0.786005	1	2.2	2.29563	4.90968	0.102776	0.76967	1	2.2	0.719892	1.64706	0.534895	0.993871	1	8.4	4.29176	19.5861	0.00158642	0.0730283	1	8.4	2.71602	6.57058	0.0136421	0.918974	1	8.4	1.99613	3.98928	0.0600249	0.993629	1
f__S24-7, 306275	0.4	-2.08256	-4.23557	0.298798	0.786005	1	0.4	-1.94698	-3.85566	0.335547	0.76967	1	0	0.135578	1.09853	0.957326	0.993871	1	0.4	-1.68945	-3.22534	0.379839	0.794631	1	0	0.393102	1.31321	0.872847	0.963978	1	0	0.257525	1.19543	0.916978	0.993629	1
f__Lachnospiraceae, 305177	0.6	2.74309	6.69504	0.243441	0.786005	1	0.4	2.50804	5.68846	0.294239	0.76967	1	0.6	-0.235055	-1.17695	0.864501	0.993871	1	0	0.697692	1.62191	0.802769	0.90078	1	0.6	-2.0454	-4.12788	0.305395	0.918974	1	0.4	-1.81035	-3.50727	0.375324	0.993629	1
o__Clostridiales, 304080	1.2	-3.46635	-11.0529	0.0837297	0.786005	1	1.2	-3.33109	-10.0637	0.0994019	0.76967	1	0	0.135254	1.09829	0.959033	0.993871	1	1.2	-3.07216	-8.41032	0.110347	0.739844	1	0	0.394186	1.3142	0.87758	0.963978	1	0	0.258933	1.19659	0.919827	0.993629	1
g__Streptococcus, 303652	0.6	-2.5021	-5.66509	0.234578	0.786005	1	0.6	-2.36735	-5.15992	0.264504	0.76967	1	0	0.134751	1.0979	0.959483	0.993871	1	0.6	-0.112738	-1.08128	0.93609	0.966174	1	0.4	2.38936	5.23926	0.260589	0.918974	1	0.4	2.25461	4.77206	0.292172	0.993629	1
o__Clostridiales, 303414	0.4	2.31936	4.9911	0.319703	0.786005	1	0.4	2.47877	5.57423	0.287731	0.76967	1	0.4	0.159415	1.11683	0.905986	0.993871	1	0	0.694867	1.61874	0.799815	0.90078	1	0.4	-1.62449	-3.08333	0.410376	0.918974	1	0.4	-1.78391	-3.44357	0.366206	0.993629	1
o__Clostridiales, 303184	1.8	-1.91896	-3.78151	0.18798	0.786005	1	1.8	-1.06296	-2.08922	0.431791	0.839864	1	0.8	0.855999	1.81001	0.577662	0.993871	1	1.8	-3.56699	-11.8515	0.0821492	0.739844	1	0.4	-1.64803	-3.13406	0.449338	0.928945	1	0.8	-2.50403	-5.67268	0.235191	0.993629	1
o__Clostridiales, 301012	0.4	-2.08278	-4.23623	0.309811	0.786005	1	0.4	-1.9472	-3.85626	0.346327	0.76967	1	0	0.135578	1.09853	0.957925	0.993871	1	0.4	-1.68968	-3.22585	0.391636	0.794631	1	0	0.393102	1.31321	0.874748	0.963978	1	0	0.257525	1.19543	0.918208	0.993629	1
o__Clostridiales, 298723	2	1.73761	3.33482	0.210969	0.786005	1	0.6	-2.39663	-5.26573	0.284781	0.76967	1	2	-4.13424	-17.5603	0.0524019	0.993871	1	0.6	-0.346556	-1.27152	0.83002	0.915541	1	2	-2.08417	-4.2403	0.153085	0.918974	1	0.4	2.05008	4.14129	0.369503	0.993629	1
f__S24-7, 295564	0.8	-3.06528	-8.37031	0.154452	0.786005	1	0.8	-0.824095	-1.77042	0.579474	0.946826	1	0.4	2.24118	4.72785	0.313663	0.993871	1	0.8	-0.669974	-1.59104	0.649854	0.90078	1	0.4	2.39531	5.26089	0.279913	0.918974	1	0.4	0.154122	1.11274	0.922226	0.993629	1
c__Alphaproteobacteria, 294146	0.4	-2.08256	-4.23557	0.298798	0.786005	1	0.4	-1.94698	-3.85566	0.335547	0.76967	1	0	0.135578	1.09853	0.957326	0.993871	1	0.4	-1.68945	-3.22534	0.379839	0.794631	1	0	0.393102	1.31321	0.872847	0.963978	1	0	0.257525	1.19543	0.916978	0.993629	1
f__Lachnospiraceae, 293665	0.4	2.3193	4.99089	0.308125	0.786005	1	0	0.437342	1.35411	0.874267	0.946826	1	0.4	-1.88196	-3.68574	0.348521	0.993871	1	0	0.694867	1.61874	0.796381	0.90078	1	0.4	-1.62443	-3.0832	0.394749	0.918974	1	0	0.257525	1.19543	0.916978	0.993629	1
g__Oscillospira, 289306	1.4	-3.60614	-12.1774	0.0736717	0.786005	1	1.4	-3.47113	-11.0896	0.0878089	0.76967	1	0	0.135005	1.0981	0.959334	0.993871	1	1.4	-3.21111	-9.26065	0.0972202	0.739844	1	0	0.395025	1.31497	0.878022	0.963978	1	0	0.26002	1.1975	0.919951	0.993629	1
g__Ruminococcus, 279492	0.8	3.1498	8.87535	0.188637	0.786005	1	0.4	2.4212	5.35618	0.327772	0.76967	1	0.8	-0.728601	-1.65703	0.618867	0.993871	1	1.6	4.14046	17.6361	0.0791641	0.739844	1	1.6	0.990655	1.98709	0.431553	0.918974	1	1.6	1.71926	3.29267	0.220248	0.993629	1
s__gnavus, 279026	30.8	1.63796	3.11226	0.0700788	0.786005	1	44.6	2.27336	4.83449	0.01172	0.432379	1	44.6	0.6354	1.55337	0.47003	0.993871	1	56.2	2.68348	6.42404	0.00289488	0.114224	1	56.2	1.04552	2.06411	0.233966	0.918974	1	56.2	0.410119	1.3288	0.639692	0.993629	1
g__Oscillospira, 277388	0.4	-2.08233	-4.23491	0.298858	0.786005	1	0.4	-1.94675	-3.85506	0.335611	0.76967	1	0	0.135578	1.09853	0.957326	0.993871	1	0.4	-1.68923	-3.22484	0.379911	0.794631	1	0	0.393102	1.31321	0.872847	0.963978	1	0	0.257525	1.19543	0.916978	0.993629	1
o__Clostridiales, 277329	3.2	1.17589	2.25931	0.304187	0.786005	1	1.6	0.443073	1.3595	0.710375	0.946826	1	3.2	-0.732812	-1.66188	0.504935	0.993871	1	1.2	0.14203	1.10346	0.907719	0.949666	1	3.2	-1.03385	-2.04749	0.361895	0.918974	1	1.6	-0.301043	-1.23203	0.799139	0.993629	1
g__Oscillospira, 276985	7.6	-1.50343	-2.83515	0.157098	0.786005	1	7.6	-1.67172	-3.18595	0.121899	0.76967	1	3	-0.168299	-1.12373	0.880652	0.993871	1	7.6	-0.876429	-1.83583	0.402279	0.794631	1	3.8	0.626996	1.54435	0.56438	0.963978	1	3.8	0.795295	1.73543	0.471944	0.993629	1
f__Ruminococcaceae, 276561	49.8	-1.09102	-2.13025	0.173409	0.786005	1	49.8	-0.880904	-1.84153	0.271511	0.76967	1	33.2	0.21012	1.15678	0.794014	0.993871	1	49.8	-1.00488	-2.00678	0.21056	0.739844	1	30.2	0.0861442	1.06153	0.914908	0.971539	1	33.2	-0.123976	-1.08973	0.87774	0.993629	1
o__Clostridiales, 276466	0.6	2.72924	6.63105	0.255808	0.786005	1	0.4	2.51735	5.72531	0.301862	0.76967	1	0.6	-0.211885	-1.1582	0.884407	0.993871	1	0.4	2.60031	6.06416	0.286269	0.749455	1	0.6	-0.128929	-1.09348	0.929531	0.978207	1	0.4	0.0829561	1.05919	0.956397	0.997082	1
g__Oscillospira, 276404	3	-1.55523	-2.93881	0.284934	0.786005	1	3	-0.815171	-1.75951	0.56348	0.946826	1	1.4	0.740062	1.67025	0.618867	0.993871	1	3	-4.27131	-19.3105	0.0465468	0.632697	1	0.8	-2.71608	-6.57086	0.216374	0.918974	1	1.4	-3.45614	-10.975	0.111003	0.993629	1
o__Clostridiales, 276402	0.4	-2.08245	-4.23525	0.298827	0.786005	1	0.4	-1.94687	-3.85537	0.335578	0.76967	1	0	0.135578	1.09853	0.957326	0.993871	1	0.4	-1.68934	-3.2251	0.379874	0.794631	1	0	0.393102	1.31321	0.872847	0.963978	1	0	0.257525	1.19543	0.916978	0.993629	1
s__gnavus, 276260	2.2	1.27823	2.42541	0.317933	0.786005	1	1.6	1.11868	2.17148	0.388791	0.797157	1	2.2	-0.159551	-1.11694	0.890634	0.993871	1	3.8	2.3109	4.96194	0.064245	0.739353	1	3.8	1.03267	2.04581	0.350022	0.918974	1	3.8	1.19223	2.28505	0.289687	0.993629	1
f__Lachnospiraceae, 276158	1.2	-3.29659	-9.82588	0.111718	0.786005	1	1.2	-3.1625	-8.9538	0.130206	0.76967	1	0	0.134086	1.0974	0.960059	0.993871	1	1.2	-2.8984	-7.45599	0.146019	0.739844	1	0	0.398185	1.31785	0.878427	0.963978	1	0	0.2641	1.20089	0.919611	0.993629	1
g__Parabacteroides, 276149	1.6	-3.88535	-14.7777	0.0619087	0.786005	1	1.6	-1.32813	-2.51078	0.316434	0.76967	1	0.6	2.55721	5.8857	0.237556	0.993871	1	1.6	-1.13916	-2.20252	0.384674	0.794631	1	0.6	2.74619	6.70944	0.202698	0.918974	1	0.6	0.188979	1.13996	0.895591	0.993629	1
g__Adlercreutzia, 275974	0.8	3.14991	8.87601	0.187464	0.786005	1	0.8	3.34271	10.1451	0.161528	0.76967	1	0.8	0.192798	1.14298	0.883276	0.993871	1	0.8	3.39053	10.487	0.156107	0.739844	1	0.8	0.240617	1.1815	0.855179	0.963978	1	0.8	0.0478189	1.0337	0.970987	0.997082	1
o__Clostridiales, 275796	0.4	2.3193	4.99089	0.308125	0.786005	1	0	0.437342	1.35411	0.874267	0.946826	1	0.4	-1.88196	-3.68574	0.348521	0.993871	1	0	0.694867	1.61874	0.796381	0.90078	1	0.4	-1.62443	-3.0832	0.394749	0.918974	1	0	0.257525	1.19543	0.916978	0.993629	1
g__Oscillospira, 275423	2.4	-1.42443	-2.68408	0.265414	0.786005	1	2.4	-4.2941	-19.6179	0.0427508	0.76967	1	1	-2.86967	-7.30897	0.186414	0.993871	1	2.4	-0.97425	-1.96462	0.439116	0.804533	1	1	0.450178	1.36621	0.738001	0.963978	1	1	3.31985	9.98558	0.124357	0.993629	1
o__Clostridiales, 275305	0.8	3.12922	8.74962	0.175536	0.786005	1	0.6	2.94209	7.68524	0.208004	0.76967	1	0.8	-0.18713	-1.1385	0.878605	0.993871	1	0.2	1.94124	3.84035	0.431833	0.799412	1	0.8	-1.18798	-2.27834	0.416705	0.918974	1	0.6	-1.00085	-2.00118	0.505914	0.993629	1
f__Ruminococcaceae, 275218	17.2	-1.91696	-3.77625	0.0269578	0.786005	1	17.2	-1.71824	-3.29036	0.0470265	0.76967	1	5	0.198712	1.14767	0.82506	0.993871	1	17.2	-1.8096	-3.50546	0.0380346	0.577206	1	5	0.107354	1.07725	0.905665	0.971539	1	5	-0.0913582	-1.06537	0.919549	0.993629	1
f__Ruminococcaceae, 275159	4.4	2.4251	5.37065	0.0930662	0.786005	1	2.4	1.58726	3.00479	0.28277	0.76967	1	4.4	-0.837834	-1.78737	0.516808	0.993871	1	3.8	2.44604	5.4492	0.0917047	0.739844	1	4.4	0.0209472	1.01463	0.986747	0.996853	1	3.8	0.858782	1.81351	0.508723	0.993629	1
o__Clostridiales, 275123	0.8	-2.93704	-7.65838	0.147486	0.786005	1	0.8	-0.759852	-1.69332	0.562671	0.946826	1	0.4	2.17719	4.52271	0.300719	0.993871	1	0.8	-2.54394	-5.83178	0.191787	0.739844	1	0	0.393102	1.31321	0.877473	0.963978	1	0.4	-1.78409	-3.444	0.378998	0.993629	1
g__Oscillospira, 274297	0.4	2.31936	4.9911	0.308111	0.786005	1	0	0.437342	1.35411	0.874267	0.946826	1	0.4	-1.88201	-3.68589	0.348504	0.993871	1	0	0.694867	1.61874	0.796381	0.90078	1	0.4	-1.62449	-3.08333	0.394729	0.918974	1	0	0.257525	1.19543	0.916978	0.993629	1
f__Lachnospiraceae, 274136	11	-1.17754	-2.26191	0.278456	0.786005	1	11	-1.2048	-2.30506	0.269918	0.76967	1	5	-0.0272615	-1.01908	0.980421	0.995377	1	11	-0.787297	-1.72584	0.467315	0.827388	1	6	0.390245	1.31062	0.723266	0.963978	1	6	0.417507	1.33562	0.706201	0.993629	1
o__Clostridiales, 274106	0.6	2.84077	7.16404	0.22335	0.786005	1	0	0.437042	1.35383	0.878259	0.946826	1	0.6	-2.40373	-5.2917	0.245476	0.993871	1	0	0.697818	1.62205	0.802106	0.90078	1	0.6	-2.14296	-4.41666	0.277579	0.918974	1	0	0.260776	1.19812	0.919108	0.993629	1
f__Lachnospiraceae, 273967	0.4	2.31965	4.99213	0.308479	0.786005	1	0	0.437342	1.35411	0.874344	0.946826	1	0.4	-1.88231	-3.68665	0.348964	0.993871	1	0	0.694867	1.61874	0.79651	0.90078	1	0.4	-1.62479	-3.08397	0.395231	0.918974	1	0	0.257525	1.19543	0.91704	0.993629	1
o__Clostridiales, 273586	3.2	-2.62014	-6.14809	0.0906534	0.786005	1	3.2	-4.39139	-20.9865	0.0449758	0.76967	1	0.4	-1.77125	-3.41351	0.449756	0.993871	1	3.2	-0.992663	-1.98985	0.468155	0.827812	1	1.4	1.62748	3.08972	0.309679	0.918974	1	1.4	3.39873	10.5468	0.12722	0.993629	1
o__Clostridiales, 273504	1.8	-4.20338	-18.4223	0.0505781	0.786005	1	1.8	-4.07051	-16.8015	0.060315	0.76967	1	0	0.13287	1.09647	0.961741	0.993871	1	1.8	-3.80087	-13.9372	0.066705	0.739844	1	0	0.402516	1.32181	0.881358	0.963978	1	0	0.269646	1.20551	0.920754	0.993629	1
f__Lachnospiraceae, 273376	0.4	-2.08226	-4.2347	0.298878	0.786005	1	0.4	-1.94668	-3.85487	0.335631	0.76967	1	0	0.135578	1.09853	0.957326	0.993871	1	0.4	-1.68916	-3.22468	0.379934	0.794631	1	0	0.393102	1.31321	0.872847	0.963978	1	0	0.257525	1.19543	0.916978	0.993629	1
o__Clostridiales, 272111	0.4	2.31936	4.9911	0.308111	0.786005	1	0	0.437342	1.35411	0.874267	0.946826	1	0.4	-1.88201	-3.68589	0.348504	0.993871	1	0	0.694867	1.61874	0.796381	0.90078	1	0.4	-1.62449	-3.08333	0.394729	0.918974	1	0	0.257525	1.19543	0.916978	0.993629	1
g__Coprococcus, 271449	0.8	-3.07336	-8.4173	0.13576	0.786005	1	0.8	-2.93847	-7.66599	0.157165	0.76967	1	0	0.134886	1.09801	0.959504	0.993871	1	0.8	-0.777813	-1.71453	0.566157	0.90078	1	0.4	2.29555	4.90939	0.283457	0.918974	1	0.4	2.16066	4.47119	0.316378	0.993629	1
o__Clostridiales, 271439	0.4	2.3908	5.24449	0.32845	0.786005	1	0	0.436802	1.3536	0.880793	0.946826	1	0.4	-1.954	-3.87448	0.373414	0.993871	1	1	3.5061	11.3616	0.140113	0.739844	1	1	1.1153	2.1664	0.428315	0.918974	1	1	3.0693	8.39365	0.147087	0.993629	1
g__Ruminococcus, 271430	0.4	-2.13815	-4.40197	0.314318	0.786005	1	0.4	-2.00292	-4.00811	0.349589	0.76967	1	0	0.135227	1.09827	0.959062	0.993871	1	0.4	0.159006	1.11652	0.912781	0.952077	1	0.4	2.29715	4.91487	0.276841	0.918974	1	0.4	2.16193	4.47512	0.309848	0.993629	1
o__Clostridiales, 271378	0.6	-2.54734	-5.84556	0.217273	0.786005	1	0.6	-2.41202	-5.32219	0.246514	0.76967	1	0	0.135322	1.09834	0.958881	0.993871	1	0.6	-0.268793	-1.2048	0.843936	0.923514	1	0.4	2.27855	4.85189	0.278505	0.918974	1	0.4	2.14323	4.41749	0.311823	0.993629	1
g__Allobaculum, 271277	1.2	3.70144	13.009	0.115734	0.786005	1	2.8	4.9069	30.0002	0.0343678	0.76967	1	2.8	1.20546	2.30611	0.283371	0.993871	1	4	5.7607	54.2178	0.0124891	0.319242	1	4	2.05926	4.16772	0.0603319	0.918974	1	4	0.853797	1.80725	0.403199	0.993629	1
g__Adlercreutzia, 271068	0.4	2.31936	4.9911	0.308111	0.786005	1	0	0.437342	1.35411	0.874267	0.946826	1	0.4	-1.88201	-3.68589	0.348504	0.993871	1	0	0.694867	1.61874	0.796381	0.90078	1	0.4	-1.62449	-3.08333	0.394729	0.918974	1	0	0.257525	1.19543	0.916978	0.993629	1
g__Oscillospira, 270519	55.2	-0.869853	-1.82748	0.212624	0.786005	1	55.2	-1.33291	-2.51911	0.0579843	0.76967	1	32.8	-0.463059	-1.37846	0.512065	0.993871	1	55.2	-1.4459	-2.72432	0.0404416	0.594147	1	32.8	-0.576042	-1.49075	0.416377	0.918974	1	21	-0.112983	-1.08146	0.874247	0.993629	1
g__Oscillospira, 270385	31	-0.81574	-1.7602	0.309742	0.786005	1	31	-0.799748	-1.7408	0.320266	0.76967	1	19	0.0159919	1.01115	0.984236	0.995727	1	31	-1.62673	-3.08812	0.0472727	0.632697	1	19	-0.810991	-1.75442	0.325388	0.918974	1	16.6	-0.826983	-1.77397	0.316833	0.993629	1
g__Oscillospira, 270303	17.6	1.16866	2.24803	0.11537	0.786005	1	21.8	1.62223	3.07851	0.0281379	0.76967	1	21.8	0.453571	1.36943	0.522252	0.993871	1	25.2	1.90502	3.74514	0.00977671	0.275544	1	25.2	0.736357	1.66596	0.297754	0.918974	1	25.2	0.282786	1.21654	0.687795	0.993629	1
o__Clostridiales, 270219	0.8	2.99647	7.98047	0.221974	0.786005	1	2.6	4.7325	26.5843	0.0472005	0.76967	1	2.6	1.73603	3.33117	0.190122	0.993871	1	1.4	3.9359	15.3046	0.103153	0.739844	1	1.4	0.939422	1.91776	0.495647	0.963978	1	2.6	-0.796608	-1.73701	0.52469	0.993629	1
o__Clostridiales, 269996	0.8	-2.93704	-7.65838	0.13528	0.786005	1	0.8	-2.80146	-6.97146	0.157948	0.76967	1	0	0.135578	1.09853	0.958042	0.993871	1	0.8	-2.54394	-5.83178	0.177074	0.739844	1	0	0.393102	1.31321	0.875119	0.963978	1	0	0.257525	1.19543	0.918448	0.993629	1
o__Clostridiales, 269815	0.6	-2.55691	-5.88446	0.209214	0.786005	1	0.6	-2.42162	-5.35771	0.238242	0.76967	1	0	0.135294	1.09832	0.958553	0.993871	1	0.6	-2.16286	-4.47801	0.269111	0.739844	1	0	0.394051	1.31408	0.876142	0.963978	1	0	0.258757	1.19645	0.918921	0.993629	1
f__S24-7, 269726	2.2	2.08321	4.23748	0.173483	0.786005	1	1.4	1.47609	2.78195	0.348116	0.76967	1	2.2	-0.607112	-1.52321	0.64639	0.993871	1	1	1.31329	2.48508	0.4098	0.794631	1	2.2	-0.769915	-1.70517	0.567643	0.963978	1	1.4	-0.162803	-1.11946	0.907124	0.993629	1
f__Ruminococcaceae, 269681	0.4	2.31951	4.99162	0.308075	0.786005	1	0	0.437342	1.35411	0.874267	0.946826	1	0.4	-1.88217	-3.68628	0.34846	0.993871	1	0	0.694867	1.61874	0.796381	0.90078	1	0.4	-1.62464	-3.08366	0.39468	0.918974	1	0	0.257525	1.19543	0.916978	0.993629	1
f__Ruminococcaceae, 269532	0.8	3.02623	8.14677	0.21561	0.786005	1	0.4	2.37329	5.18121	0.345955	0.76967	1	0.8	-0.65294	-1.57237	0.673573	0.993871	1	0.8	3.37811	10.3971	0.165774	0.739844	1	0.8	0.351883	1.27622	0.803624	0.963978	1	0.8	1.00482	2.0067	0.514052	0.993629	1
f__Ruminococcaceae, 269418	18.8	-0.725748	-1.65376	0.323916	0.786005	1	18.8	-0.467443	-1.38266	0.524241	0.945139	1	12.4	0.258306	1.19607	0.727289	0.993871	1	18.8	-1.35815	-2.56356	0.0726982	0.739844	1	11.4	-0.632398	-1.55014	0.407334	0.918974	1	12.4	-0.890703	-1.85408	0.242183	0.993629	1
f__Lachnospiraceae, 269362	0.6	-2.63025	-6.19134	0.20083	0.786005	1	0.6	-2.49546	-5.63906	0.228736	0.76967	1	0	0.134796	1.09794	0.959036	0.993871	1	0.6	-2.23452	-4.70605	0.258447	0.739844	1	0	0.395734	1.31561	0.876636	0.963978	1	0	0.260938	1.19826	0.91891	0.993629	1
g__Oscillospira, 269172	0.4	-2.08226	-4.2347	0.319577	0.786005	1	0.8	0.90795	1.87638	0.479504	0.899722	1	0.8	2.99021	7.94589	0.133654	0.993871	1	0.4	-1.68916	-3.22468	0.402005	0.794631	1	0	0.393102	1.31321	0.876406	0.963978	1	0.8	-2.59711	-6.05072	0.174657	0.993629	1
s__gnavus, 269107	2	4.12084	17.3979	0.102039	0.786005	1	2.6	4.56231	23.6261	0.0693463	0.76967	1	2.6	0.441466	1.35798	0.760312	0.993871	1	2	4.50942	22.7757	0.0731462	0.739844	1	2	0.388578	1.3091	0.789396	0.963978	1	2.6	-0.0528882	-1.03734	0.970712	0.997082	1
o__Clostridiales, 268910	0.8	3.12907	8.7487	0.169238	0.786005	1	0.4	2.47896	5.57494	0.291464	0.76967	1	0.8	-0.650112	-1.56929	0.603622	0.993871	1	0	0.694867	1.61874	0.800939	0.90078	1	0.8	-2.4342	-5.40465	0.202074	0.918974	1	0.4	-1.78409	-3.44401	0.371284	0.993629	1
f__Lachnospiraceae, 268880	0.8	3.12922	8.74962	0.160395	0.786005	1	0	0.437342	1.35411	0.875294	0.946826	1	0.8	-2.69188	-6.46154	0.168291	0.993871	1	0	0.694867	1.61874	0.798123	0.90078	1	0.8	-2.43435	-5.40522	0.188844	0.918974	1	0	0.257525	1.19543	0.917815	0.993629	1
f__Lachnospiraceae, 268841	0.6	2.7266	6.61892	0.253644	0.786005	1	0.4	2.50459	5.67487	0.301968	0.76967	1	0.6	-0.222009	-1.16636	0.877315	0.993871	1	0.4	2.55477	5.87572	0.293155	0.752776	1	0.6	-0.171831	-1.12649	0.90532	0.971539	1	0.4	0.0501776	1.03539	0.973429	0.997082	1
g__Oscillospira, 268725	0.4	-2.08233	-4.23491	0.298858	0.786005	1	0.4	-1.94675	-3.85506	0.335611	0.76967	1	0	0.135578	1.09853	0.957326	0.993871	1	0.4	-1.68923	-3.22484	0.379911	0.794631	1	0	0.393102	1.31321	0.872847	0.963978	1	0	0.257525	1.19543	0.916978	0.993629	1
f__Lachnospiraceae, 268620	0.4	2.31951	4.99162	0.308075	0.786005	1	0	0.437342	1.35411	0.874267	0.946826	1	0.4	-1.88217	-3.68628	0.34846	0.993871	1	0	0.694867	1.61874	0.796381	0.90078	1	0.4	-1.62464	-3.08366	0.39468	0.918974	1	0	0.257525	1.19543	0.916978	0.993629	1
f__Lachnospiraceae, 268538	0.4	-2.08233	-4.23491	0.310682	0.786005	1	0.4	0.0945859	1.06776	0.944297	0.97244	1	0.4	2.17692	4.52186	0.285877	0.993871	1	0.4	-1.68923	-3.22484	0.392578	0.794631	1	0	0.393102	1.31321	0.874877	0.963978	1	0.4	-1.78381	-3.44335	0.363027	0.993629	1
f__Ruminococcaceae, 268425	0.6	2.71275	6.55571	0.251568	0.786005	1	0.6	2.86786	7.29983	0.225626	0.76967	1	0.6	0.15511	1.11351	0.90777	0.993871	1	0	0.698251	1.62254	0.803286	0.90078	1	0.6	-2.0145	-4.04041	0.316724	0.918974	1	0.6	-2.16961	-4.49902	0.281119	0.993629	1
f__S24-7, 268099	0.4	-2.08245	-4.23525	0.298827	0.786005	1	0.4	-1.94687	-3.85537	0.335578	0.76967	1	0	0.135578	1.09853	0.957326	0.993871	1	0.4	-1.68934	-3.2251	0.379874	0.794631	1	0	0.393102	1.31321	0.872847	0.963978	1	0	0.257525	1.19543	0.916978	0.993629	1
s__gnavus, 267996	2.2	2.05095	4.1438	0.176056	0.786005	1	1.4	1.67612	3.19566	0.277951	0.76967	1	2.2	-0.374839	-1.29669	0.770454	0.993871	1	3.2	2.71798	6.57949	0.0699458	0.739844	1	3.2	0.667021	1.58779	0.587621	0.963978	1	3.2	1.04186	2.05888	0.4104	0.993629	1
g__Coprococcus, 267514	10.6	0.962984	1.94934	0.327327	0.786005	1	5.8	-0.45949	-1.37506	0.653285	0.946826	1	10.6	-1.42247	-2.68045	0.153391	0.993871	1	5.8	0.30317	1.23385	0.76208	0.90078	1	10.6	-0.659814	-1.57988	0.498254	0.963978	1	5.4	0.76266	1.69662	0.452147	0.993629	1
f__Lachnospiraceae, 267406	2.8	1.79901	3.4798	0.167282	0.786005	1	1	0.603659	1.51957	0.664507	0.946826	1	2.8	-1.19535	-2.29	0.325186	0.993871	1	0.8	0.448997	1.36509	0.751517	0.90078	1	2.8	-1.35001	-2.54914	0.278134	0.918974	1	1	-0.154662	-1.11316	0.907966	0.993629	1
g__Ruminococcus, 267042	1.4	-1.7375	-3.33456	0.246849	0.786005	1	3.2	1.06219	2.0881	0.393688	0.79836	1	3.2	2.79969	6.9629	0.0527335	0.993871	1	1.4	-0.0319016	-1.02236	0.980623	0.989942	1	1.4	1.70559	3.26163	0.256912	0.918974	1	3.2	-1.09409	-2.13479	0.381495	0.993629	1
s__gnavus, 266896	0.6	2.8906	7.41576	0.213944	0.786005	1	0	0.436957	1.35375	0.878172	0.946826	1	0.6	-2.45364	-5.47796	0.234045	0.993871	1	0	0.698682	1.62302	0.801656	0.90078	1	0.6	-2.19191	-4.56911	0.264646	0.918974	1	0	0.261725	1.19891	0.918716	0.993629	1
f__Ruminococcaceae, 266715	0.4	-2.08226	-4.2347	0.298878	0.786005	1	0.4	-1.94668	-3.85487	0.335631	0.76967	1	0	0.135578	1.09853	0.957326	0.993871	1	0.4	-1.68916	-3.22468	0.379934	0.794631	1	0	0.393102	1.31321	0.872847	0.963978	1	0	0.257525	1.19543	0.916978	0.993629	1
f__Lachnospiraceae, 266413	0.4	-2.08226	-4.2347	0.298878	0.786005	1	0.4	-1.94668	-3.85487	0.335631	0.76967	1	0	0.135578	1.09853	0.957326	0.993871	1	0.4	-1.68916	-3.22468	0.379934	0.794631	1	0	0.393102	1.31321	0.872847	0.963978	1	0	0.257525	1.19543	0.916978	0.993629	1
o__Clostridiales, 266061	2.8	2.17725	4.52292	0.138024	0.786005	1	0.6	0.630477	1.54808	0.691074	0.946826	1	2.8	-1.54678	-2.92163	0.255308	0.993871	1	0.4	-1.76562	-3.4002	0.423352	0.79601	1	2.8	-3.94287	-15.3788	0.0542292	0.918974	1	0.6	-2.3961	-5.26377	0.261697	0.993629	1
g__Ruminococcus, 265940	11.4	-1.50725	-2.84268	0.0849494	0.786005	1	11.4	-1.86051	-3.63137	0.0387449	0.76967	1	4	-0.353262	-1.27745	0.705072	0.993871	1	11.4	-1.83328	-3.56347	0.0426692	0.608286	1	4	-0.326034	-1.25356	0.728019	0.963978	1	2.8	0.0272287	1.01905	0.977398	0.997625	1
s__gnavus, 265503	0.8	3.01405	8.07832	0.20709	0.786005	1	0.6	2.88929	7.40906	0.230872	0.76967	1	0.8	-0.124765	-1.09033	0.927639	0.993871	1	0	0.700057	1.62457	0.805462	0.90078	1	0.8	-2.314	-4.97259	0.256093	0.918974	1	0.6	-2.18923	-4.56063	0.288803	0.993629	1
g__Oscillospira, 265483	12	-1.16865	-2.24801	0.193722	0.786005	1	12	-1.55955	-2.94761	0.089491	0.76967	1	5.8	-0.390897	-1.31121	0.676649	0.993871	1	12	-1.46446	-2.75961	0.110976	0.739844	1	5.8	-0.295814	-1.22758	0.752414	0.963978	1	3.8	0.0950829	1.06813	0.920787	0.993629	1
g__Adlercreutzia, 265106	1.8	1.83214	3.56064	0.21289	0.786005	1	2	1.9574	3.88362	0.183784	0.76967	1	2	0.125267	1.09071	0.918207	0.993871	1	4.2	3.13016	8.75531	0.0287389	0.526115	1	4.2	1.29802	2.45891	0.267052	0.918974	1	4.2	1.17275	2.25442	0.316912	0.993629	1
f__Ruminococcaceae, 265036	1	-3.23083	-9.38808	0.105806	0.786005	1	1	-3.09538	-8.54679	0.12448	0.76967	1	0	0.135449	1.09843	0.958723	0.993871	1	1	-2.8373	-7.1468	0.138927	0.739844	1	0	0.393533	1.31361	0.877003	0.963978	1	0	0.258084	1.19589	0.919582	0.993629	1
f__S24-7, 264787	0.4	-2.08233	-4.23491	0.298858	0.786005	1	0.4	-1.94675	-3.85506	0.335611	0.76967	1	0	0.135578	1.09853	0.957326	0.993871	1	0.4	-1.68923	-3.22484	0.379911	0.794631	1	0	0.393102	1.31321	0.872847	0.963978	1	0	0.257525	1.19543	0.916978	0.993629	1
f__Rikenellaceae, 264325	0.4	2.32691	5.01731	0.32179	0.786005	1	0.4	2.47279	5.55117	0.292858	0.76967	1	0.4	0.145877	1.1064	0.915846	0.993871	1	0	0.69519	1.6191	0.800852	0.90078	1	0.4	-1.63172	-3.09883	0.413115	0.918974	1	0.4	-1.7776	-3.42856	0.373258	0.993629	1
o__Clostridiales, 264225	0.6	-2.52331	-5.74898	0.24065	0.786005	1	0.8	0.387237	1.30789	0.779885	0.946826	1	0.8	2.91054	7.51902	0.168239	0.993871	1	0.8	0.452383	1.3683	0.744604	0.90078	1	0.8	2.97569	7.86632	0.159314	0.918974	1	0.8	0.0651455	1.04619	0.960899	0.997082	1
o__Clostridiales, 264137	0.6	2.80301	6.97895	0.234451	0.786005	1	0.4	2.45491	5.48278	0.307958	0.76967	1	0.6	-0.348103	-1.27289	0.803258	0.993871	1	0	0.697929	1.62217	0.803337	0.90078	1	0.6	-2.10508	-4.30222	0.293081	0.918974	1	0.4	-1.75698	-3.37989	0.394013	0.993629	1
f__Lachnospiraceae, 263992	0.8	-2.8542	-7.23103	0.162415	0.786005	1	0.8	-2.7194	-6.58597	0.186866	0.76967	1	0	0.134807	1.09795	0.959121	0.993871	1	0.8	-2.4585	-5.49646	0.210599	0.739844	1	0	0.3957	1.31558	0.876927	0.963978	1	0	0.260893	1.19822	0.919106	0.993629	1
o__Clostridiales, 263953	1	-3.23986	-9.44704	0.105615	0.786005	1	1	-3.10454	-8.6012	0.124207	0.76967	1	0	0.135325	1.09834	0.958821	0.993871	1	1	-2.84591	-7.18961	0.138656	0.739844	1	0	0.393948	1.31398	0.877055	0.963978	1	0	0.258624	1.19634	0.919533	0.993629	1
s__gnavus, 263946	0.4	2.3193	4.99089	0.317009	0.786005	1	0	0.437342	1.35411	0.875818	0.946826	1	0.4	-1.88196	-3.68574	0.359555	0.993871	1	0.4	2.59972	6.06167	0.261161	0.739844	1	0.4	0.280418	1.21455	0.831649	0.963978	1	0.4	2.16237	4.47651	0.291344	0.993629	1
f__Lachnospiraceae, 263908	1.8	1.71947	3.29316	0.249519	0.786005	1	0.4	0.191537	1.14198	0.908228	0.959651	1	1.8	-1.52794	-2.88373	0.291644	0.993871	1	1.2	1.37811	2.59927	0.369005	0.794631	1	1.8	-0.341368	-1.26696	0.792978	0.963978	1	1.2	1.18657	2.27611	0.426133	0.993629	1
f__S24-7, 263873	3	-1.57151	-2.97215	0.181927	0.786005	1	3	-0.31378	-1.24296	0.773853	0.946826	1	2.4	1.25773	2.39119	0.289621	0.993871	1	3	-1.64378	-3.12483	0.176293	0.739844	1	1	-0.0722686	-1.05137	0.955743	0.987956	1	2.4	-1.33	-2.51402	0.277868	0.993629	1
g__Oscillospira, 263546	5.2	-1.33885	-2.52949	0.213049	0.786005	1	5.2	-5.20695	-36.9358	0.011164	0.432379	1	2	-3.8681	-14.6021	0.06268	0.993871	1	5.2	-0.208468	-1.15546	0.839844	0.921959	1	3.8	1.13038	2.18916	0.296323	0.918974	1	3.8	4.99848	31.9663	0.0150383	0.993629	1
o__Clostridiales, 263535	0.4	-2.08226	-4.2347	0.328973	0.786005	1	0.4	0.0949291	1.06801	0.94851	0.97244	1	0.4	2.17719	4.52271	0.303919	0.993871	1	0.4	0.215692	1.16126	0.882789	0.937057	1	0.4	2.29795	4.91759	0.276776	0.918974	1	0.4	0.120763	1.08731	0.933191	0.993629	1
f__Lachnospiraceae, 263500	1.2	-1.42913	-2.69284	0.293586	0.786005	1	1.2	-1.2583	-2.39213	0.354627	0.76967	1	0.4	0.170832	1.12571	0.910421	0.993871	1	1.2	-3.02796	-8.15655	0.125997	0.739844	1	0.4	-1.59883	-3.02897	0.444581	0.92049	1	0.4	-1.76966	-3.40974	0.397265	0.993629	1
f__S24-7, 263420	0.6	2.74905	6.72273	0.241672	0.786005	1	0	0.437106	1.35389	0.878499	0.946826	1	0.6	-2.31194	-4.96551	0.267796	0.993871	1	0.4	2.59822	6.05539	0.276419	0.745217	1	0.6	-0.150828	-1.11021	0.912311	0.971539	1	0.4	2.16111	4.4726	0.310372	0.993629	1
o__Clostridiales, 263390	4	-1.51048	-2.84904	0.225364	0.786005	1	4	-3.06906	-8.39228	0.0352701	0.76967	1	1.4	-1.55859	-2.94565	0.301124	0.993871	1	4	-2.74194	-6.68968	0.0526166	0.666776	1	1.4	-1.23146	-2.34805	0.400811	0.918974	1	0.4	0.327125	1.25451	0.842812	0.993629	1
g__Oscillospira, 263337	44.8	-1.07787	-2.11092	0.200078	0.786005	1	44.8	-1.44166	-2.71633	0.0885405	0.76967	1	22	-0.363786	-1.2868	0.669235	0.993871	1	44.8	-1.91955	-3.78306	0.0247889	0.518689	1	22	-0.841681	-1.79214	0.327842	0.918974	1	15.6	-0.477895	-1.39271	0.580767	0.993629	1
s__gnavus, 263179	0.4	2.3193	4.99089	0.308125	0.786005	1	0	0.437342	1.35411	0.874267	0.946826	1	0.4	-1.88196	-3.68574	0.348521	0.993871	1	0	0.694867	1.61874	0.796381	0.90078	1	0.4	-1.62443	-3.0832	0.394749	0.918974	1	0	0.257525	1.19543	0.916978	0.993629	1
o__Clostridiales, 263155	0.6	2.74651	6.71092	0.240118	0.786005	1	0.4	2.46651	5.52706	0.300613	0.76967	1	0.6	-0.28	-1.21419	0.837194	0.993871	1	0	0.696369	1.62042	0.802387	0.90078	1	0.6	-2.05014	-4.14147	0.300553	0.918974	1	0.4	-1.77014	-3.41088	0.383913	0.993629	1
f__Ruminococcaceae, 262944	41.4	-1.05432	-2.07674	0.212831	0.786005	1	41.4	-1.05316	-2.07507	0.213952	0.76967	1	27	0.00116294	1.00081	0.99891	0.999529	1	41.4	-1.36859	-2.58218	0.107923	0.739844	1	27	-0.314264	-1.24338	0.71335	0.963978	1	25.8	-0.315427	-1.24438	0.712698	0.993629	1
f__S24-7, 262399	0.4	-2.08256	-4.23557	0.298798	0.786005	1	0.4	-1.94698	-3.85566	0.335547	0.76967	1	0	0.135578	1.09853	0.957326	0.993871	1	0.4	-1.68945	-3.22534	0.379839	0.794631	1	0	0.393102	1.31321	0.872847	0.963978	1	0	0.257525	1.19543	0.916978	0.993629	1
o__Clostridiales, 262394	0.6	2.76623	6.80328	0.227005	0.786005	1	0	0.437282	1.35405	0.876455	0.946826	1	0.6	-2.32895	-5.02439	0.249369	0.993871	1	0	0.695451	1.61939	0.799881	0.90078	1	0.6	-2.07078	-4.20114	0.281855	0.918974	1	0	0.258169	1.19596	0.918535	0.993629	1
g__Allobaculum, 262329	1.4	3.83932	14.3136	0.0974044	0.786005	1	0	0.436927	1.35372	0.87974	0.946826	1	1.4	-3.40239	-10.5736	0.0969395	0.993871	1	0	0.698988	1.62337	0.804216	0.90078	1	1.4	-3.14033	-8.81724	0.107775	0.918974	1	0	0.26206	1.19919	0.919877	0.993629	1
f__Ruminococcaceae, 262258	0.4	-2.08256	-4.23557	0.298798	0.786005	1	0.4	-1.94698	-3.85566	0.335547	0.76967	1	0	0.135578	1.09853	0.957326	0.993871	1	0.4	-1.68945	-3.22534	0.379839	0.794631	1	0	0.393102	1.31321	0.872847	0.963978	1	0	0.257525	1.19543	0.916978	0.993629	1
f__S24-7, 262166	6.6	0.996335	1.99493	0.286334	0.786005	1	4.4	0.383479	1.30448	0.688324	0.946826	1	6.6	-0.612856	-1.52928	0.502622	0.993871	1	6.6	1.07197	2.10231	0.253533	0.739844	1	6.6	0.0756384	1.05383	0.932743	0.978207	1	6.6	0.688494	1.6116	0.453585	0.993629	1
f__Lachnospiraceae, 262104	2.2	4.61598	24.5216	0.0612394	0.786005	1	3.8	5.55165	46.9043	0.0235693	0.678107	1	3.8	0.935669	1.91278	0.477591	0.993871	1	4.2	5.6934	51.7469	0.0202185	0.457733	1	4.2	1.07742	2.11026	0.413221	0.918974	1	4.2	0.141754	1.10325	0.912515	0.993629	1
f__S24-7, 262102	2	1.57848	2.98656	0.276735	0.786005	1	1.2	0.888144	1.85079	0.554012	0.946826	1	2	-0.69034	-1.61366	0.607464	0.993871	1	1.8	1.45246	2.73675	0.323314	0.790259	1	2	-0.126019	-1.09128	0.923363	0.975062	1	1.8	0.56432	1.47869	0.679243	0.993629	1
o__Clostridiales, 261664	0.6	2.76623	6.80328	0.227106	0.786005	1	0	0.437282	1.35405	0.876472	0.946826	1	0.6	-2.32895	-5.02439	0.249498	0.993871	1	0	0.695451	1.61939	0.799912	0.90078	1	0.6	-2.07078	-4.20114	0.282002	0.918974	1	0	0.258169	1.19596	0.918549	0.993629	1
o__Clostridiales, 261161	0.4	-2.08278	-4.23623	0.31028	0.786005	1	0.4	-1.9472	-3.85626	0.346785	0.76967	1	0	0.135578	1.09853	0.95795	0.993871	1	0.4	-1.68968	-3.22585	0.392136	0.794631	1	0	0.393102	1.31321	0.874829	0.963978	1	0	0.257525	1.19543	0.91826	0.993629	1
f__Ruminococcaceae, 261132	0.8	-2.79974	-6.96317	0.199372	0.786005	1	1.4	0.89834	1.86392	0.509049	0.934835	1	1.4	3.69808	12.9788	0.0813113	0.993871	1	0.8	-0.50972	-1.42377	0.73985	0.90078	1	0.4	2.29002	4.89064	0.306083	0.918974	1	1.4	-1.40806	-2.6538	0.330977	0.993629	1
f__S24-7, 260875	0.4	2.31951	4.99162	0.308075	0.786005	1	0	0.437342	1.35411	0.874267	0.946826	1	0.4	-1.88217	-3.68628	0.34846	0.993871	1	0	0.694867	1.61874	0.796381	0.90078	1	0.4	-1.62464	-3.08366	0.39468	0.918974	1	0	0.257525	1.19543	0.916978	0.993629	1
f__Ruminococcaceae, 260547	0.6	-2.63025	-6.19134	0.200924	0.786005	1	0.6	-2.49546	-5.63906	0.228832	0.76967	1	0	0.134796	1.09794	0.959042	0.993871	1	0.6	-2.23452	-4.70605	0.258556	0.739844	1	0	0.395734	1.31561	0.876653	0.963978	1	0	0.260938	1.19826	0.918921	0.993629	1
f__Lachnospiraceae, 260346	2	4.17684	18.0865	0.0862215	0.786005	1	0.8	3.20297	9.20854	0.198003	0.76967	1	2	-0.973868	-1.9641	0.48835	0.993871	1	1.6	4.07141	16.8119	0.0962364	0.739844	1	2	-0.105433	-1.07582	0.936927	0.979482	1	1.6	0.868435	1.82568	0.543115	0.993629	1
o__Clostridiales, 260200	0.4	-2.08226	-4.2347	0.298878	0.786005	1	0.4	-1.94668	-3.85487	0.335631	0.76967	1	0	0.135578	1.09853	0.957326	0.993871	1	0.4	-1.68916	-3.22468	0.379934	0.794631	1	0	0.393102	1.31321	0.872847	0.963978	1	0	0.257525	1.19543	0.916978	0.993629	1
o__Clostridiales, 259916	0.4	-2.08226	-4.2347	0.316504	0.786005	1	0.4	0.0947493	1.06788	0.945685	0.97244	1	0.4	2.17701	4.52215	0.291591	0.993871	1	0.4	-1.68916	-3.22468	0.398759	0.794631	1	0	0.393102	1.31321	0.875877	0.963978	1	0.4	-1.78391	-3.44357	0.369206	0.993629	1
f__Lachnospiraceae, 259912	0.8	3.12907	8.7487	0.178932	0.786005	1	0.4	2.47877	5.57423	0.301743	0.76967	1	0.8	-0.650296	-1.56949	0.627834	0.993871	1	1	3.66964	12.7254	0.112228	0.739844	1	1	0.540576	1.45455	0.644969	0.963978	1	1	1.19087	2.28291	0.363551	0.993629	1
f__Lachnospiraceae, 259382	0.6	-2.55283	-5.86784	0.224444	0.786005	1	0.6	-2.41762	-5.34288	0.253653	0.76967	1	0	0.135213	1.09826	0.959366	0.993871	1	1	0.777249	1.71386	0.540703	0.90078	1	1	3.33008	10.0567	0.103023	0.918974	1	1	3.19487	9.15694	0.120823	0.993629	1
f__Ruminococcaceae, 259173	0.4	-2.08233	-4.23491	0.298858	0.786005	1	0.4	-1.94675	-3.85506	0.335611	0.76967	1	0	0.135578	1.09853	0.957326	0.993871	1	0.4	-1.68923	-3.22484	0.379911	0.794631	1	0	0.393102	1.31321	0.872847	0.963978	1	0	0.257525	1.19543	0.916978	0.993629	1
f__Ruminococcaceae, 259120	55.8	-1.10925	-2.15733	0.145135	0.786005	1	55.8	-1.46112	-2.75323	0.0563721	0.76967	1	29	-0.351877	-1.27622	0.647775	0.993871	1	55.8	-1.68903	-3.22439	0.0281945	0.526115	1	29	-0.579779	-1.49462	0.453876	0.932743	1	19.4	-0.227902	-1.17113	0.769689	0.993629	1
f__S24-7, 258485	1	3.40993	10.629	0.13162	0.786005	1	0	0.437342	1.35411	0.877056	0.946826	1	1	-2.97259	-7.84943	0.135125	0.993871	1	0	0.694867	1.61874	0.801109	0.90078	1	1	-2.71506	-6.56622	0.150987	0.918974	1	0	0.257525	1.19543	0.919242	0.993629	1
o__Clostridiales, 258202	1.4	3.79631	13.8932	0.123247	0.786005	1	1.6	3.9274	15.2147	0.11099	0.76967	1	1.6	0.131084	1.09512	0.924699	0.993871	1	0.6	3.03571	8.20047	0.228696	0.739844	1	1.4	-0.760605	-1.6942	0.608997	0.963978	1	1.6	-0.891689	-1.85535	0.549245	0.993629	1
f__S24-7, 242029	4.2	1.24643	2.37254	0.297577	0.786005	1	2.4	0.643279	1.56187	0.598411	0.946826	1	4.2	-0.603153	-1.51903	0.601939	0.993871	1	2.6	0.927728	1.90228	0.44493	0.807677	1	4.2	-0.318704	-1.24721	0.781498	0.963978	1	2.6	0.28445	1.21795	0.808683	0.993629	1
g__Clostridium, 234912	4.6	1.41154	2.66021	0.195847	0.786005	1	4	1.15814	2.23169	0.293922	0.76967	1	4.6	-0.253404	-1.19202	0.804409	0.993871	1	6.8	1.93559	3.82533	0.074482	0.739844	1	6.8	0.524045	1.43798	0.60153	0.963978	1	6.8	0.777449	1.7141	0.444488	0.993629	1
o__Clostridiales, 234054	0.8	2.9923	7.95741	0.239222	0.786005	1	2	4.1887	18.2357	0.0926886	0.76967	1	2	1.1964	2.29167	0.426896	0.993871	1	0.8	3.36587	10.3093	0.184241	0.739844	1	0.8	0.373575	1.29556	0.812748	0.963978	1	2	-0.822824	-1.76886	0.581562	0.993629	1
f__Lachnospiraceae, 233991	11.6	2.26634	4.81101	0.0525095	0.786005	1	14.6	2.92614	7.60072	0.0118804	0.432379	1	14.6	0.659798	1.57986	0.537584	0.993871	1	19	3.14459	8.84334	0.00681656	0.209193	1	19	0.878253	1.83815	0.411438	0.918974	1	19	0.218456	1.16349	0.837179	0.993629	1
f__Ruminococcaceae, 232257	0.8	3.05025	8.28355	0.184957	0.786005	1	0	0.437029	1.35381	0.877704	0.946826	1	0.8	-2.61322	-6.11868	0.198867	0.993871	1	0	0.697956	1.6222	0.801114	0.90078	1	0.8	-2.35229	-5.10636	0.224345	0.918974	1	0	0.260927	1.19825	0.918605	0.993629	1
f__Lachnospiraceae, 231169	0.4	-2.0847	-4.24187	0.328117	0.786005	1	0.4	0.0781251	1.05565	0.957646	0.975301	1	0.4	2.16283	4.47791	0.307334	0.993871	1	0.4	0.212974	1.15908	0.884131	0.937057	1	0.4	2.29767	4.91665	0.276629	0.918974	1	0.4	0.134849	1.09798	0.925505	0.993629	1
o__Clostridiales, 229459	1.4	-3.64944	-12.5485	0.0722934	0.786005	1	1.4	-3.51476	-11.43	0.0860993	0.76967	1	0	0.134685	1.09785	0.959623	0.993871	1	1.4	-3.25333	-9.53564	0.0953752	0.739844	1	0	0.396115	1.31596	0.878277	0.963978	1	0	0.261429	1.19867	0.919907	0.993629	1
o__Clostridiales, 229452	1.4	3.65521	12.5987	0.123075	0.786005	1	0	0.436652	1.35346	0.881342	0.946826	1	1.4	-3.21855	-9.30853	0.127158	0.993871	1	0	0.701896	1.62664	0.805952	0.90078	1	1.4	-2.95331	-7.74524	0.142665	0.918974	1	0	0.265244	1.20184	0.920127	0.993629	1
o__Clostridiales, 229449	0.4	2.31936	4.9911	0.308111	0.786005	1	0	0.437342	1.35411	0.874267	0.946826	1	0.4	-1.88201	-3.68589	0.348504	0.993871	1	0	0.694867	1.61874	0.796381	0.90078	1	0.4	-1.62449	-3.08333	0.394729	0.918974	1	0	0.257525	1.19543	0.916978	0.993629	1
o__Clostridiales, 228798	1.6	1.63971	3.11603	0.203126	0.786005	1	0.4	-1.94675	-3.85506	0.367584	0.772654	1	1.6	-3.58646	-12.0125	0.0748074	0.993871	1	0.4	-1.68923	-3.22484	0.414588	0.79601	1	1.6	-3.32894	-10.0487	0.0823033	0.918974	1	0	0.257525	1.19543	0.920627	0.993629	1
f__Ruminococcaceae, 228391	1	-3.23986	-9.44704	0.105617	0.786005	1	1	-3.10454	-8.6012	0.12421	0.76967	1	0	0.135325	1.09834	0.958821	0.993871	1	1	-2.84591	-7.18961	0.13866	0.739844	1	0	0.393948	1.31398	0.877055	0.963978	1	0	0.258624	1.19634	0.919534	0.993629	1
o__Clostridiales, 227886	0.4	-2.08226	-4.2347	0.298878	0.786005	1	0.4	-1.94668	-3.85487	0.335631	0.76967	1	0	0.135578	1.09853	0.957326	0.993871	1	0.4	-1.68916	-3.22468	0.379934	0.794631	1	0	0.393102	1.31321	0.872847	0.963978	1	0	0.257525	1.19543	0.916978	0.993629	1
f__Coriobacteriaceae, 227819	1.8	4.19398	18.3027	0.0715624	0.786005	1	2	4.55415	23.4929	0.0497873	0.76967	1	2	0.360173	1.28358	0.740691	0.993871	1	4.4	5.73014	53.0818	0.0127142	0.319242	1	4.4	1.53616	2.90022	0.140116	0.918974	1	4.4	1.17599	2.25948	0.2524	0.993629	1
f__S24-7, 216958	0.4	2.31951	4.99162	0.308075	0.786005	1	0	0.437342	1.35411	0.874267	0.946826	1	0.4	-1.88217	-3.68628	0.34846	0.993871	1	0	0.694867	1.61874	0.796381	0.90078	1	0.4	-1.62464	-3.08366	0.39468	0.918974	1	0	0.257525	1.19543	0.916978	0.993629	1
f__S24-7, 216524	0.4	2.31936	4.9911	0.308111	0.786005	1	0	0.437342	1.35411	0.874267	0.946826	1	0.4	-1.88201	-3.68589	0.348504	0.993871	1	0	0.694867	1.61874	0.796381	0.90078	1	0.4	-1.62449	-3.08333	0.394729	0.918974	1	0	0.257525	1.19543	0.916978	0.993629	1
f__S24-7, 216184	0.4	2.3196	4.99192	0.308055	0.786005	1	0	0.437342	1.35411	0.874267	0.946826	1	0.4	-1.88225	-3.6865	0.348435	0.993871	1	0	0.694867	1.61874	0.796381	0.90078	1	0.4	-1.62473	-3.08384	0.394652	0.918974	1	0	0.257525	1.19543	0.916978	0.993629	1
o__Clostridiales, 215751	2.2	-2.35425	-5.11327	0.091185	0.786005	1	2.2	-2.17394	-4.51255	0.117911	0.76967	1	0.4	0.180306	1.13312	0.910334	0.993871	1	2.2	-1.28816	-2.44217	0.307177	0.767109	1	0.8	1.06608	2.09374	0.474455	0.950459	1	0.8	0.885777	1.84776	0.551481	0.993629	1
o__Clostridiales, 215507	0.4	-2.08226	-4.2347	0.298878	0.786005	1	0.4	-1.94668	-3.85487	0.335631	0.76967	1	0	0.135578	1.09853	0.957326	0.993871	1	0.4	-1.68916	-3.22468	0.379934	0.794631	1	0	0.393102	1.31321	0.872847	0.963978	1	0	0.257525	1.19543	0.916978	0.993629	1
f__S24-7, 214603	1.6	4.05107	16.5765	0.0852902	0.786005	1	0.4	2.57388	5.95407	0.295285	0.76967	1	1.6	-1.47719	-2.78407	0.279458	0.993871	1	0	0.700664	1.62525	0.806314	0.90078	1	1.6	-3.35041	-10.1994	0.0932352	0.918974	1	0.4	-1.87321	-3.66348	0.37667	0.993629	1
f__S24-7, 214392	0.8	3.02176	8.12158	0.214302	0.786005	1	1.2	3.63157	12.394	0.131251	0.76967	1	1.2	0.609809	1.52606	0.654183	0.993871	1	0.4	2.59869	6.05738	0.297067	0.752776	1	0.8	-0.423067	-1.34078	0.779042	0.963978	1	1.2	-1.03288	-2.0461	0.480458	0.993629	1
o__Clostridiales, 210895	1.8	4.2506	19.0352	0.064101	0.786005	1	0.4	2.44108	5.43047	0.313998	0.76967	1	1.8	-1.80952	-3.50526	0.161434	0.993871	1	0	0.697146	1.62129	0.804467	0.90078	1	1.8	-3.55345	-11.7407	0.0654825	0.918974	1	0.4	-1.74393	-3.34947	0.401928	0.993629	1
o__Clostridiales, 210218	6.8	-1.78181	-3.43858	0.182807	0.786005	1	6.8	-1.12896	-2.187	0.391277	0.79835	1	2.6	0.652859	1.57228	0.631836	0.993871	1	6.8	-2.63129	-6.19582	0.0631439	0.738998	1	1.8	-0.84948	-1.80185	0.560312	0.963978	1	2.6	-1.50234	-2.83302	0.296718	0.993629	1
f__S24-7, 207284	10.2	1.23143	2.34799	0.261946	0.786005	1	5	0.310726	1.24033	0.781541	0.946826	1	10.2	-0.920701	-1.89303	0.395373	0.993871	1	6	0.891618	1.85526	0.421218	0.79601	1	10.2	-0.339809	-1.26559	0.751013	0.963978	1	6	0.580892	1.49577	0.595521	0.993629	1
g__Coprococcus, 205613	0.4	2.31936	4.9911	0.308111	0.786005	1	0	0.437342	1.35411	0.874267	0.946826	1	0.4	-1.88201	-3.68589	0.348504	0.993871	1	0	0.694867	1.61874	0.796381	0.90078	1	0.4	-1.62449	-3.08333	0.394729	0.918974	1	0	0.257525	1.19543	0.916978	0.993629	1
f__S24-7, 205160	0.4	2.31936	4.9911	0.322748	0.786005	1	0	0.437342	1.35411	0.876825	0.946826	1	0.4	-1.88201	-3.68589	0.36661	0.993871	1	0.4	2.59991	6.06248	0.266853	0.739844	1	0.4	0.280552	1.21466	0.837298	0.963978	1	0.4	2.16257	4.47711	0.298486	0.993629	1
f__S24-7, 204111	0.4	2.31936	4.9911	0.308111	0.786005	1	0	0.437342	1.35411	0.874267	0.946826	1	0.4	-1.88201	-3.68589	0.348504	0.993871	1	0	0.694867	1.61874	0.796381	0.90078	1	0.4	-1.62449	-3.08333	0.394729	0.918974	1	0	0.257525	1.19543	0.916978	0.993629	1
f__S24-7, 204088	3.4	4.96096	31.1456	0.0457935	0.786005	1	2.2	4.62824	24.7309	0.0635343	0.76967	1	3.4	-0.332715	-1.25938	0.809452	0.993871	1	1.2	3.85956	14.5159	0.126306	0.739844	1	3.4	-1.10139	-2.14562	0.44229	0.918974	1	2.2	-0.768678	-1.70371	0.59647	0.993629	1
f__S24-7, 199414	0.6	2.76623	6.80328	0.227094	0.786005	1	0	0.437282	1.35405	0.87647	0.946826	1	0.6	-2.32895	-5.02439	0.249483	0.993871	1	0	0.695451	1.61939	0.799908	0.90078	1	0.6	-2.07078	-4.20114	0.281984	0.918974	1	0	0.258169	1.19596	0.918547	0.993629	1
o__Clostridiales, 199391	0.6	2.84363	7.17823	0.236184	0.786005	1	0.8	3.31962	9.98402	0.162728	0.76967	1	0.8	0.475992	1.39087	0.721751	0.993871	1	0.8	3.34358	10.1512	0.160495	0.739844	1	0.8	0.499947	1.41416	0.710005	0.963978	1	0.8	0.0239556	1.01674	0.985342	0.998354	1
f__Ruminococcaceae, 199307	40	-1.26582	-2.40464	0.233482	0.786005	1	40	-1.06674	-2.09469	0.315172	0.76967	1	16.8	0.199085	1.14797	0.8522	0.993871	1	40	-1.58794	-3.00619	0.13748	0.739844	1	16.8	-0.322115	-1.25016	0.764583	0.963978	1	15.4	-0.5212	-1.43515	0.627866	0.993629	1
o__Clostridiales, 199067	1.6	-1.84895	-3.60238	0.17746	0.786005	1	1.6	-3.72227	-13.1982	0.0738875	0.76967	1	0.4	-1.87332	-3.66374	0.396222	0.993871	1	1.6	-1.5589	-2.94629	0.252767	0.739844	1	0.4	0.290051	1.22268	0.851373	0.963978	1	0.4	2.16337	4.4796	0.326136	0.993629	1
f__S24-7, 198865	12.2	1.05215	2.07361	0.230107	0.786005	1	10.8	1.17161	2.25263	0.181685	0.76967	1	12.2	0.119467	1.08633	0.887974	0.993871	1	7.2	0.571516	1.48608	0.52071	0.885571	1	12.2	-0.48063	-1.39535	0.576754	0.963978	1	10.8	-0.600096	-1.51582	0.486146	0.993629	1
f__Lachnospiraceae, 198808	0.6	2.84077	7.16404	0.223376	0.786005	1	0	0.437042	1.35383	0.878264	0.946826	1	0.6	-2.40373	-5.2917	0.245508	0.993871	1	0	0.697818	1.62205	0.802114	0.90078	1	0.6	-2.14296	-4.41666	0.277615	0.918974	1	0	0.260776	1.19812	0.919111	0.993629	1
f__Ruminococcaceae, 198753	0.4	-2.08256	-4.23557	0.298798	0.786005	1	0.4	-1.94698	-3.85566	0.335547	0.76967	1	0	0.135578	1.09853	0.957326	0.993871	1	0.4	-1.68945	-3.22534	0.379839	0.794631	1	0	0.393102	1.31321	0.872847	0.963978	1	0	0.257525	1.19543	0.916978	0.993629	1
f__S24-7, 197891	1.2	3.6512	12.5638	0.118126	0.786005	1	0	0.436938	1.35373	0.880139	0.946826	1	1.2	-3.21426	-9.28086	0.12089	0.993871	1	0.4	2.6588	6.31506	0.273199	0.741232	1	1.2	-0.992402	-1.98949	0.457786	0.93716	1	0.4	2.22186	4.66494	0.306622	0.993629	1
f__S24-7, 197801	17.6	-0.791461	-1.73083	0.31561	0.786005	1	17.6	-0.133322	-1.09682	0.864545	0.946826	1	14.8	0.658139	1.57805	0.404098	0.993871	1	17.6	0.263782	1.20062	0.734716	0.90078	1	17.2	1.05524	2.07807	0.179291	0.918974	1	17.2	0.397104	1.31686	0.610029	0.993629	1
g__Dorea, 197765	6	1.84675	3.59688	0.0977773	0.786005	1	9.4	2.61052	6.10722	0.0181107	0.568428	1	9.4	0.763768	1.69792	0.445	0.993871	1	13.6	3.06667	8.37838	0.0053135	0.177098	1	13.6	1.21992	2.32935	0.220243	0.918974	1	13.6	0.456157	1.37188	0.642627	0.993629	1
o__Clostridiales, 197568	1.4	3.86856	14.6067	0.114326	0.786005	1	0.6	3.03248	8.18213	0.226028	0.76967	1	1.4	-0.836084	-1.7852	0.565045	0.993871	1	0.6	3.34455	10.1581	0.179157	0.739844	1	1.4	-0.524006	-1.43794	0.713448	0.963978	1	0.6	0.312079	1.2415	0.837244	0.993629	1
o__Clostridiales, 197453	8.8	1.04327	2.06089	0.240936	0.786005	1	5.8	0.716674	1.64339	0.426306	0.835076	1	8.8	-0.326593	-1.25405	0.704093	0.993871	1	5.6	0.608746	1.52493	0.502177	0.864471	1	8.8	-0.434522	-1.35146	0.616023	0.963978	1	5.8	-0.107928	-1.07768	0.902162	0.993629	1
o__Clostridiales, 197331	0.4	-2.08233	-4.23491	0.298858	0.786005	1	0.4	-1.94675	-3.85506	0.335611	0.76967	1	0	0.135578	1.09853	0.957326	0.993871	1	0.4	-1.68923	-3.22484	0.379911	0.794631	1	0	0.393102	1.31321	0.872847	0.963978	1	0	0.257525	1.19543	0.916978	0.993629	1
f__S24-7, 197074	1.4	1.59315	3.01708	0.287937	0.786005	1	1.8	1.75586	3.37727	0.24146	0.76967	1	1.8	0.162705	1.11938	0.898592	0.993871	1	1.2	1.42604	2.68708	0.350631	0.794631	1	1.4	-0.167116	-1.12281	0.898524	0.971539	1	1.8	-0.329821	-1.25686	0.801249	0.993629	1
f__S24-7, 197038	1.2	3.80632	13.9899	0.131394	0.786005	1	2.6	4.9151	30.1711	0.0488624	0.76967	1	2.6	1.10878	2.15663	0.440518	0.993871	1	2.2	4.9452	30.8073	0.047647	0.632697	1	2.2	1.13888	2.2021	0.429156	0.918974	1	2.6	0.0301032	1.02109	0.982737	0.99803	1
f__Ruminococcaceae, 196918	0.6	2.8059	6.99292	0.233947	0.786005	1	0	0.436975	1.35376	0.879025	0.946826	1	0.6	-2.36892	-5.16555	0.258542	0.993871	1	0.4	2.60057	6.06525	0.278756	0.745217	1	0.6	-0.205329	-1.15295	0.882151	0.963978	1	0.4	2.16359	4.48029	0.313266	0.993629	1
o__Clostridiales, 196697	1.2	-3.51683	-11.4465	0.0871896	0.786005	1	1.2	-3.38225	-10.427	0.102802	0.76967	1	0	0.134582	1.09777	0.95987	0.993871	1	1.2	-1.22311	-2.33449	0.36497	0.794631	1	0.4	2.29372	4.90319	0.288949	0.918974	1	0.4	2.15914	4.46648	0.321794	0.993629	1
f__S24-7, 196240	5	1.69865	3.24596	0.131932	0.786005	1	2.4	0.78778	1.72642	0.499894	0.927894	1	5	-0.910866	-1.88017	0.391749	0.993871	1	3.2	1.33876	2.52934	0.243348	0.739844	1	5	-0.359884	-1.28332	0.729652	0.963978	1	3.2	0.550982	1.46508	0.611486	0.993629	1
g__Oscillospira, 196194	0.4	-2.08226	-4.2347	0.298878	0.786005	1	0.4	-1.94668	-3.85487	0.335631	0.76967	1	0	0.135578	1.09853	0.957326	0.993871	1	0.4	-1.68916	-3.22468	0.379934	0.794631	1	0	0.393102	1.31321	0.872847	0.963978	1	0	0.257525	1.19543	0.916978	0.993629	1
g__Oscillospira, 196191	0.4	2.3196	4.99192	0.308055	0.786005	1	0	0.437342	1.35411	0.874267	0.946826	1	0.4	-1.88225	-3.6865	0.348435	0.993871	1	0	0.694867	1.61874	0.796381	0.90078	1	0.4	-1.62473	-3.08384	0.394652	0.918974	1	0	0.257525	1.19543	0.916978	0.993629	1
o__Clostridiales, 195998	0.4	-2.08233	-4.23491	0.298858	0.786005	1	0.4	-1.94675	-3.85506	0.335611	0.76967	1	0	0.135578	1.09853	0.957326	0.993871	1	0.4	-1.68923	-3.22484	0.379911	0.794631	1	0	0.393102	1.31321	0.872847	0.963978	1	0	0.257525	1.19543	0.916978	0.993629	1
o__Clostridiales, 195934	0.4	2.31936	4.9911	0.308111	0.786005	1	0	0.437342	1.35411	0.874267	0.946826	1	0.4	-1.88201	-3.68589	0.348504	0.993871	1	0	0.694867	1.61874	0.796381	0.90078	1	0.4	-1.62449	-3.08333	0.394729	0.918974	1	0	0.257525	1.19543	0.916978	0.993629	1
f__Lachnospiraceae, 195885	0.4	2.31936	4.9911	0.308111	0.786005	1	0	0.437342	1.35411	0.874267	0.946826	1	0.4	-1.88201	-3.68589	0.348504	0.993871	1	0	0.694867	1.61874	0.796381	0.90078	1	0.4	-1.62449	-3.08333	0.394729	0.918974	1	0	0.257525	1.19543	0.916978	0.993629	1
f__Lachnospiraceae, 195694	0.6	-2.55691	-5.88446	0.20936	0.786005	1	0.6	-2.42162	-5.35771	0.238389	0.76967	1	0	0.135294	1.09832	0.958561	0.993871	1	0.6	-2.16286	-4.47801	0.269277	0.739844	1	0	0.394051	1.31408	0.876168	0.963978	1	0	0.258757	1.19645	0.918937	0.993629	1
f__Lachnospiraceae, 195691	3.6	2.60731	6.09368	0.0745455	0.786005	1	0.4	0.102613	1.07372	0.951416	0.972543	1	3.6	-2.5047	-5.67532	0.0806231	0.993871	1	4.8	3.33662	10.1024	0.0213462	0.472545	1	4.8	0.729309	1.65784	0.525613	0.963978	1	4.8	3.23401	9.40879	0.0228397	0.993629	1
s__gnavus, 194858	3.8	2.56188	5.90478	0.0644792	0.786005	1	2.8	2.31533	4.97717	0.0980351	0.76967	1	3.8	-0.246558	-1.18637	0.827766	0.993871	1	7.6	3.79731	13.9029	0.00538605	0.177098	1	7.6	1.23543	2.35452	0.256932	0.918974	1	7.6	1.48199	2.79333	0.180748	0.993629	1
f__Lachnospiraceae, 194822	1.4	3.8847	14.771	0.0986377	0.786005	1	0.4	2.44948	5.46219	0.320364	0.76967	1	1.4	-1.43522	-2.70424	0.300622	0.993871	1	1.2	3.98135	15.7945	0.0914608	0.739844	1	1.4	0.0966476	1.06929	0.935157	0.978373	1	1.2	1.53187	2.8916	0.273173	0.993629	1
g__Oscillospira, 194665	55	-0.93488	-1.91173	0.266886	0.786005	1	55	-0.809888	-1.75307	0.336251	0.76967	1	29.4	0.124992	1.0905	0.882486	0.993871	1	55	-1.20998	-2.31335	0.152786	0.739844	1	29.4	-0.275103	-1.21008	0.746091	0.963978	1	26.2	-0.400095	-1.3196	0.637779	0.993629	1
f__S24-7, 194225	21.6	-0.742899	-1.67354	0.30128	0.786005	1	21.6	-1.02347	-2.0328	0.158733	0.76967	1	13.2	-0.280569	-1.21467	0.701514	0.993871	1	21.6	-0.498852	-1.41309	0.487827	0.848475	1	13.2	0.244047	1.18431	0.73638	0.963978	1	12.2	0.524616	1.43855	0.473795	0.993629	1
g__Dorea, 193509	3.2	2.48292	5.59029	0.0887197	0.786005	1	3.2	2.52297	5.74765	0.0845441	0.76967	1	3.2	0.040049	1.02815	0.973053	0.994744	1	2	1.99969	3.99915	0.179609	0.739844	1	3.2	-0.483231	-1.39787	0.691872	0.963978	1	3.2	-0.52328	-1.43722	0.669028	0.993629	1
f__Ruminococcaceae, 193139	15.4	0.86719	1.82411	0.312238	0.786005	1	12	0.685415	1.60816	0.426928	0.83511	1	15.4	-0.181775	-1.13428	0.829062	0.993871	1	14.4	0.895333	1.86004	0.298574	0.755186	1	15.4	0.0281434	1.0197	0.973287	0.991963	1	14.4	0.209918	1.15662	0.803841	0.993629	1
g__Coprococcus, 192878	0.4	2.3193	4.99089	0.308125	0.786005	1	0	0.437342	1.35411	0.874267	0.946826	1	0.4	-1.88196	-3.68574	0.348521	0.993871	1	0	0.694867	1.61874	0.796381	0.90078	1	0.4	-1.62443	-3.0832	0.394749	0.918974	1	0	0.257525	1.19543	0.916978	0.993629	1
g__Oscillospira, 192557	1	-3.12253	-8.70913	0.149633	0.786005	1	1	0.12703	1.09204	0.926375	0.97244	1	1	3.24956	9.51075	0.131599	0.993871	1	1	-0.833632	-1.78217	0.582086	0.90078	1	0.4	2.2889	4.88682	0.308384	0.918974	1	1	-0.960663	-1.9462	0.521183	0.993629	1
o__Clostridiales, 192504	0.4	2.31936	4.9911	0.308111	0.786005	1	0	0.437342	1.35411	0.874267	0.946826	1	0.4	-1.88201	-3.68589	0.348504	0.993871	1	0	0.694867	1.61874	0.796381	0.90078	1	0.4	-1.62449	-3.08333	0.394729	0.918974	1	0	0.257525	1.19543	0.916978	0.993629	1
f__S24-7, 192206	0.6	2.74074	6.68411	0.244775	0.786005	1	0	0.437034	1.35382	0.878783	0.946826	1	0.6	-2.3037	-4.93723	0.271634	0.993871	1	0.4	2.64631	6.26065	0.26809	0.739844	1	0.6	-0.0944228	-1.06764	0.94524	0.984446	1	0.4	2.20928	4.62444	0.300274	0.993629	1
g__Oscillospira, 191816	1.2	-1.39727	-2.63403	0.288392	0.786005	1	1.2	-3.28854	-9.77122	0.108483	0.76967	1	0.4	-1.89127	-3.70961	0.379845	0.993871	1	1.2	-3.02935	-8.16444	0.12085	0.739844	1	0.4	-1.63208	-3.0996	0.428766	0.918974	1	0	0.259184	1.1968	0.920356	0.993629	1
g__Oscillospira, 191445	1.2	-3.40889	-10.6213	0.100854	0.786005	1	1.2	-0.415069	-1.33336	0.741529	0.946826	1	0.8	2.99382	7.96578	0.154299	0.993871	1	1.2	-0.0463688	-1.03266	0.96985	0.984826	1	1	3.36252	10.2853	0.106446	0.918974	1	1	0.368701	1.29119	0.771048	0.993629	1
o__Clostridiales, 191325	0.8	-2.90496	-7.48996	0.172953	0.786005	1	0.8	-0.743478	-1.67421	0.613055	0.946826	1	0.4	2.16148	4.47373	0.326438	0.993871	1	1.4	0.860265	1.81537	0.50176	0.864471	1	1.4	3.76522	13.5971	0.070395	0.918974	1	1.4	1.60374	3.03931	0.250516	0.993629	1
g__Oscillospira, 190676	0.4	-2.08233	-4.23491	0.298858	0.786005	1	0.4	-1.94675	-3.85506	0.335611	0.76967	1	0	0.135578	1.09853	0.957326	0.993871	1	0.4	-1.68923	-3.22484	0.379911	0.794631	1	0	0.393102	1.31321	0.872847	0.963978	1	0	0.257525	1.19543	0.916978	0.993629	1
g__Oscillospira, 190658	11.6	-1.33165	-2.51691	0.168483	0.786005	1	11.6	-0.689195	-1.61238	0.470106	0.888072	1	6.8	0.642457	1.56098	0.510971	0.993871	1	11.6	-0.934438	-1.91115	0.331944	0.794631	1	5.6	0.397214	1.31696	0.687099	0.963978	1	6.8	-0.245243	-1.18529	0.801114	0.993629	1
o__Clostridiales, 190425	0.4	-2.08226	-4.2347	0.298878	0.786005	1	0.4	-1.94668	-3.85487	0.335631	0.76967	1	0	0.135578	1.09853	0.957326	0.993871	1	0.4	-1.68916	-3.22468	0.379934	0.794631	1	0	0.393102	1.31321	0.872847	0.963978	1	0	0.257525	1.19543	0.916978	0.993629	1
o__Clostridiales, 189703	3.6	-1.90145	-3.73587	0.156788	0.786005	1	3.6	-1.67679	-3.19716	0.209651	0.76967	1	1	0.224657	1.1685	0.875281	0.993871	1	3.6	-4.57626	-23.8556	0.0270531	0.526115	1	0.8	-2.67481	-6.38555	0.209713	0.918974	1	1	-2.89947	-7.46152	0.173125	0.993629	1
f__S24-7, 189397	0.4	2.3193	4.99089	0.308125	0.786005	1	0	0.437342	1.35411	0.874267	0.946826	1	0.4	-1.88196	-3.68574	0.348521	0.993871	1	0	0.694867	1.61874	0.796381	0.90078	1	0.4	-1.62443	-3.0832	0.394749	0.918974	1	0	0.257525	1.19543	0.916978	0.993629	1
f__Lachnospiraceae, 189288	1.4	3.84659	14.386	0.0854762	0.786005	1	0	0.437342	1.35411	0.876938	0.946826	1	1.4	-3.40925	-10.624	0.0821431	0.993871	1	0	0.694867	1.61874	0.800909	0.90078	1	1.4	-3.15173	-8.88719	0.0903191	0.918974	1	0	0.257525	1.19543	0.919147	0.993629	1
f__Clostridiaceae, 189279	1.6	4.0294	16.3294	0.0916065	0.786005	1	1.6	4.07493	16.853	0.0885614	0.76967	1	1.6	0.0455345	1.03207	0.97072	0.994744	1	2	4.54523	23.3481	0.0561845	0.705371	1	2	0.515833	1.42982	0.671454	0.963978	1	2	0.470298	1.3854	0.700906	0.993629	1
g__Coprococcus, 188973	1.4	-3.59563	-12.089	0.0782092	0.786005	1	1.4	-3.46056	-11.0086	0.0927522	0.76967	1	0	0.135062	1.09814	0.959609	0.993871	1	1.4	-1.33474	-2.52229	0.317044	0.78046	1	0.4	2.26089	4.79287	0.294635	0.918974	1	0.4	2.12583	4.36454	0.328014	0.993629	1
g__Oscillospira, 188862	0.4	-2.08226	-4.2347	0.298878	0.786005	1	0.4	-1.94668	-3.85487	0.335631	0.76967	1	0	0.135578	1.09853	0.957326	0.993871	1	0.4	-1.68916	-3.22468	0.379934	0.794631	1	0	0.393102	1.31321	0.872847	0.963978	1	0	0.257525	1.19543	0.916978	0.993629	1
f__Lachnospiraceae, 188138	0.4	2.31936	4.9911	0.328276	0.786005	1	0	0.437342	1.35411	0.877792	0.946826	1	0.4	-1.88201	-3.68589	0.373351	0.993871	1	0.8	3.39324	10.5067	0.139993	0.739844	1	0.8	1.07388	2.10509	0.405505	0.918974	1	0.8	2.9559	7.75916	0.145664	0.993629	1
o__Clostridiales, 188116	0.4	-2.08226	-4.2347	0.313861	0.786005	1	0.4	-1.94668	-3.85487	0.350296	0.76967	1	0	0.135578	1.09853	0.958138	0.993871	1	0.4	0.215886	1.16142	0.874388	0.936882	1	0.4	2.29814	4.91825	0.261687	0.918974	1	0.4	2.16257	4.47711	0.294846	0.993629	1
f__Ruminococcaceae, 187882	0.4	2.3193	4.99089	0.308125	0.786005	1	0	0.437342	1.35411	0.874267	0.946826	1	0.4	-1.88196	-3.68574	0.348521	0.993871	1	0	0.694867	1.61874	0.796381	0.90078	1	0.4	-1.62443	-3.0832	0.394749	0.918974	1	0	0.257525	1.19543	0.916978	0.993629	1
g__Oscillospira, 187807	0.4	-2.08233	-4.23491	0.323667	0.786005	1	0.4	0.0948565	1.06796	0.947349	0.97244	1	0.4	2.17719	4.52271	0.298666	0.993871	1	0.4	-1.68923	-3.22484	0.406308	0.794631	1	0	0.393102	1.31321	0.877116	0.963978	1	0.4	-1.78409	-3.444	0.376803	0.993629	1
o__Clostridiales, 186162	0.8	3.06984	8.39679	0.184415	0.786005	1	0	0.436966	1.35375	0.878182	0.946826	1	0.8	-2.63287	-6.2026	0.198406	0.993871	1	0	0.698595	1.62292	0.801703	0.90078	1	0.8	-2.37124	-5.17387	0.223883	0.918974	1	0	0.261629	1.19883	0.918756	0.993629	1
f__Lachnospiraceae, 186122	0.6	-2.55691	-5.88446	0.209509	0.786005	1	0.6	-2.42162	-5.35771	0.238541	0.76967	1	0	0.135294	1.09832	0.958569	0.993871	1	0.6	-2.16286	-4.47801	0.269449	0.739844	1	0	0.394051	1.31408	0.876194	0.963978	1	0	0.258757	1.19645	0.918954	0.993629	1
o__Clostridiales, 185917	0.6	2.76623	6.80328	0.227082	0.786005	1	0	0.437282	1.35405	0.876468	0.946826	1	0.6	-2.32895	-5.02439	0.249467	0.993871	1	0	0.695451	1.61939	0.799904	0.90078	1	0.6	-2.07078	-4.20114	0.281967	0.918974	1	0	0.258169	1.19596	0.918546	0.993629	1
f__Lachnospiraceae, 185587	0.4	2.31951	4.99162	0.308075	0.786005	1	0	0.437342	1.35411	0.874267	0.946826	1	0.4	-1.88217	-3.68628	0.34846	0.993871	1	0	0.694867	1.61874	0.796381	0.90078	1	0.4	-1.62464	-3.08366	0.39468	0.918974	1	0	0.257525	1.19543	0.916978	0.993629	1
o__Clostridiales, 185483	0.4	-2.08245	-4.23525	0.298827	0.786005	1	0.4	-1.94687	-3.85537	0.335578	0.76967	1	0	0.135578	1.09853	0.957326	0.993871	1	0.4	-1.68934	-3.2251	0.379874	0.794631	1	0	0.393102	1.31321	0.872847	0.963978	1	0	0.257525	1.19543	0.916978	0.993629	1
s__gnavus, 185441	0.6	2.76623	6.80328	0.22707	0.786005	1	0	0.437282	1.35405	0.876466	0.946826	1	0.6	-2.32895	-5.02439	0.249452	0.993871	1	0	0.695451	1.61939	0.799901	0.90078	1	0.6	-2.07078	-4.20114	0.281949	0.918974	1	0	0.258169	1.19596	0.918544	0.993629	1
f__Lachnospiraceae, 184484	0.4	-2.08233	-4.23491	0.298858	0.786005	1	0.4	-1.94675	-3.85506	0.335611	0.76967	1	0	0.135578	1.09853	0.957326	0.993871	1	0.4	-1.68923	-3.22484	0.379911	0.794631	1	0	0.393102	1.31321	0.872847	0.963978	1	0	0.257525	1.19543	0.916978	0.993629	1
f__S24-7, 184329	0.6	-2.58107	-5.98382	0.235441	0.786005	1	0.6	-2.447	-5.45282	0.264216	0.76967	1	0	0.134063	1.09738	0.960609	0.993871	1	1.2	1.11875	2.17158	0.410164	0.794631	1	1.2	3.69981	12.9944	0.0780907	0.918974	1	1.2	3.56575	11.8413	0.0920827	0.993629	1
o__Clostridiales, 183832	0.8	-2.93737	-7.66016	0.142329	0.786005	1	0.8	-2.8018	-6.97308	0.165283	0.76967	1	0	0.135578	1.09853	0.958477	0.993871	1	0.8	-2.54427	-5.83314	0.185597	0.739844	1	0	0.393102	1.31321	0.876495	0.963978	1	0	0.257525	1.19543	0.919339	0.993629	1
f__Ruminococcaceae, 183829	9.2	-0.896633	-1.86172	0.253828	0.786005	1	9.2	-0.512867	-1.42688	0.510645	0.935866	1	7	0.383766	1.30474	0.629077	0.993871	1	9.2	-0.409872	-1.32857	0.599142	0.90078	1	7.6	0.486761	1.4013	0.54017	0.963978	1	7.6	0.102995	1.074	0.896085	0.993629	1
f__S24-7, 183773	0.6	-2.58045	-5.98125	0.234026	0.786005	1	0.6	-2.44659	-5.45125	0.262788	0.76967	1	0	0.133861	1.09723	0.960585	0.993871	1	0.8	0.497838	1.4121	0.723094	0.90078	1	0.8	3.07828	8.4461	0.148435	0.918974	1	0.8	2.94442	7.69768	0.170229	0.993629	1
s__gnavus, 183174	0.4	2.31951	4.99162	0.308075	0.786005	1	0	0.437342	1.35411	0.874267	0.946826	1	0.4	-1.88217	-3.68628	0.34846	0.993871	1	0	0.694867	1.61874	0.796381	0.90078	1	0.4	-1.62464	-3.08366	0.39468	0.918974	1	0	0.257525	1.19543	0.916978	0.993629	1
o__Clostridiales, 183100	0.4	-2.08278	-4.23623	0.310709	0.786005	1	0.4	-1.9472	-3.85626	0.347205	0.76967	1	0	0.135578	1.09853	0.957974	0.993871	1	0.4	-1.68968	-3.22585	0.392592	0.794631	1	0	0.393102	1.31321	0.874902	0.963978	1	0	0.257525	1.19543	0.918308	0.993629	1
o__Clostridiales, 183053	0.4	2.34541	5.08204	0.323015	0.786005	1	0.4	2.51079	5.69932	0.290063	0.76967	1	0.4	0.165385	1.12147	0.906884	0.993871	1	0	0.696576	1.62065	0.802046	0.90078	1	0.4	-1.64883	-3.13579	0.414752	0.918974	1	0.4	-1.81421	-3.51668	0.369516	0.993629	1
f__Ruminococcaceae, 182984	0.4	2.31936	4.9911	0.308111	0.786005	1	0	0.437342	1.35411	0.874267	0.946826	1	0.4	-1.88201	-3.68589	0.348504	0.993871	1	0	0.694867	1.61874	0.796381	0.90078	1	0.4	-1.62449	-3.08333	0.394729	0.918974	1	0	0.257525	1.19543	0.916978	0.993629	1
f__S24-7, 182242	1.6	-1.83183	-3.55988	0.189961	0.786005	1	1.6	-0.0831099	-1.0593	0.944265	0.97244	1	1.4	1.74872	3.3606	0.211188	0.993871	1	1.6	-3.42329	-10.7279	0.0874877	0.739844	1	0.4	-1.59146	-3.01355	0.455921	0.935553	1	1.4	-3.34018	-10.1273	0.0955706	0.993629	1
f__Ruminococcaceae, 182061	1	-3.21644	-9.29494	0.12183	0.786005	1	1	0.05466	1.03861	0.964509	0.980684	1	1	3.2711	9.65385	0.114464	0.993871	1	1	0.139795	1.10175	0.909452	0.95076	1	1	3.35624	10.2407	0.105413	0.918974	1	1	0.0851353	1.06079	0.944275	0.997082	1
g__Bacteroides, 181719	0.8	3.12931	8.75014	0.170886	0.786005	1	0.4	2.47868	5.57388	0.293312	0.76967	1	0.8	-0.650625	-1.56985	0.607864	0.993871	1	0	0.694867	1.61874	0.801472	0.90078	1	0.8	-2.43444	-5.40554	0.204518	0.918974	1	0.4	-1.78381	-3.44335	0.373784	0.993629	1
f__S24-7, 181605	0.4	2.31965	4.99213	0.308514	0.786005	1	0	0.437342	1.35411	0.87435	0.946826	1	0.4	-1.88231	-3.68665	0.349009	0.993871	1	0	0.694867	1.61874	0.796521	0.90078	1	0.4	-1.62479	-3.08397	0.39528	0.918974	1	0	0.257525	1.19543	0.917045	0.993629	1
o__Clostridiales, 181419	0.8	3.15718	8.92084	0.171358	0.786005	1	0	0.437237	1.35401	0.878158	0.946826	1	0.8	-2.71994	-6.58847	0.182742	0.993871	1	0.4	2.5994	6.06035	0.274414	0.743069	1	0.8	-0.557778	-1.472	0.66784	0.963978	1	0.4	2.16216	4.47586	0.307893	0.993629	1
g__Coprococcus, 181348	3.8	1.93456	3.82262	0.113504	0.786005	1	3.8	2.1416	4.41252	0.0793875	0.76967	1	3.8	0.20704	1.15432	0.844228	0.993871	1	5.2	2.50766	5.68695	0.0387817	0.581969	1	5.2	0.573095	1.48771	0.583482	0.963978	1	5.2	0.366054	1.28882	0.725714	0.993629	1
g__Oscillospira, 180879	0.4	2.31951	4.99162	0.308075	0.786005	1	0	0.437342	1.35411	0.874267	0.946826	1	0.4	-1.88217	-3.68628	0.34846	0.993871	1	0	0.694867	1.61874	0.796381	0.90078	1	0.4	-1.62464	-3.08366	0.39468	0.918974	1	0	0.257525	1.19543	0.916978	0.993629	1
o__Clostridiales, 180584	2.8	1.49148	2.81176	0.291585	0.786005	1	0.8	0.09142	1.06542	0.952247	0.972673	1	2.8	-1.40006	-2.63912	0.315621	0.993871	1	2.4	1.58241	2.99469	0.265748	0.739844	1	2.8	0.0909299	1.06506	0.943355	0.983225	1	2.4	1.49099	2.81081	0.287898	0.993629	1
g__Coprococcus, 180555	0.4	2.3193	4.99089	0.308125	0.786005	1	0	0.437342	1.35411	0.874267	0.946826	1	0.4	-1.88196	-3.68574	0.348521	0.993871	1	0	0.694867	1.61874	0.796381	0.90078	1	0.4	-1.62443	-3.0832	0.394749	0.918974	1	0	0.257525	1.19543	0.916978	0.993629	1
f__S24-7, 180397	1.6	3.97546	15.7302	0.090147	0.786005	1	1.2	3.7841	13.7761	0.108963	0.76967	1	1.6	-0.191364	-1.14184	0.871611	0.993871	1	2.8	5.03512	32.7886	0.0301779	0.526115	1	2.8	1.05966	2.08444	0.338105	0.918974	1	2.8	1.25102	2.3801	0.271405	0.993629	1
s__gnavus, 180221	0.6	-3.09926	-8.5698	0.165923	0.786005	1	1.4	0.595713	1.51122	0.680722	0.946826	1	1.4	3.69497	12.9508	0.093094	0.993871	1	1	0.222847	1.16703	0.880692	0.937057	1	1	3.32211	10.0012	0.135385	0.918974	1	1.4	-0.372866	-1.29492	0.794117	0.993629	1
f__S24-7, 180092	0.8	-2.94688	-7.7108	0.153284	0.786005	1	0.8	-2.81245	-7.02476	0.176487	0.76967	1	0	0.134432	1.09766	0.959566	0.993871	1	0.8	-2.54989	-5.85592	0.198869	0.739844	1	0	0.396985	1.31675	0.877566	0.963978	1	0	0.262553	1.1996	0.919275	0.993629	1
o__Clostridiales, 179949	0.6	2.64967	6.27526	0.288863	0.786005	1	0.4	2.54414	5.83262	0.313432	0.76967	1	0.6	-0.105532	-1.07589	0.947535	0.993871	1	1.4	3.85421	14.4622	0.113694	0.739844	1	1.4	1.20454	2.30463	0.410206	0.918974	1	1.4	1.31007	2.47953	0.384343	0.993629	1
f__S24-7, 179838	0.4	2.31936	4.9911	0.308111	0.786005	1	0	0.437342	1.35411	0.874267	0.946826	1	0.4	-1.88201	-3.68589	0.348504	0.993871	1	0	0.694867	1.61874	0.796381	0.90078	1	0.4	-1.62449	-3.08333	0.394729	0.918974	1	0	0.257525	1.19543	0.916978	0.993629	1
s__muciniphila, 179814	2.4	2.84992	7.20959	0.0845037	0.786005	1	0.4	0.73438	1.66368	0.690766	0.946826	1	2.4	-2.11554	-4.33352	0.148363	0.993871	1	0.6	1.39491	2.62972	0.430489	0.799202	1	2.4	-1.45501	-2.74158	0.28672	0.918974	1	0.6	0.660528	1.58066	0.678785	0.993629	1
f__S24-7, 179457	0.6	2.85276	7.22381	0.226093	0.786005	1	0.4	2.42162	5.35771	0.315982	0.76967	1	0.6	-0.431142	-1.3483	0.758554	0.993871	1	0	0.698554	1.62288	0.803337	0.90078	1	0.6	-2.15421	-4.45124	0.281661	0.918974	1	0.4	-1.72306	-3.30137	0.405015	0.993629	1
f__S24-7, 179192	0.4	-2.08233	-4.23491	0.311587	0.786005	1	0.4	0.0945859	1.06776	0.944534	0.97244	1	0.4	2.17692	4.52186	0.28677	0.993871	1	0.4	-1.68923	-3.22484	0.393541	0.794631	1	0	0.393102	1.31321	0.875033	0.963978	1	0.4	-1.78381	-3.44335	0.363996	0.993629	1
g__Adlercreutzia, 178735	5.6	1.60721	3.04662	0.147715	0.786005	1	6.8	2.08413	4.24018	0.0588329	0.76967	1	6.8	0.476915	1.39176	0.635879	0.993871	1	9.4	2.67873	6.40293	0.0144105	0.355374	1	9.4	1.07152	2.10165	0.283071	0.918974	1	9.4	0.594606	1.51006	0.548185	0.993629	1
g__Bacteroides, 178478	0.4	-2.08245	-4.23525	0.298827	0.786005	1	0.4	-1.94687	-3.85537	0.335578	0.76967	1	0	0.135578	1.09853	0.957326	0.993871	1	0.4	-1.68934	-3.2251	0.379874	0.794631	1	0	0.393102	1.31321	0.872847	0.963978	1	0	0.257525	1.19543	0.916978	0.993629	1
f__S24-7, 178274	3.2	1.6683	3.17841	0.259689	0.786005	1	1.2	-0.429019	-1.34632	0.789676	0.946826	1	3.2	-2.09732	-4.27915	0.166528	0.993871	1	1.2	0.266051	1.20251	0.864182	0.936028	1	3.2	-1.40225	-2.64314	0.336699	0.918974	1	1.2	0.69507	1.61896	0.661912	0.993629	1
o__Clostridiales, 178173	0.4	-2.08278	-4.23623	0.311112	0.786005	1	0.4	-1.9472	-3.85626	0.347599	0.76967	1	0	0.135578	1.09853	0.957996	0.993871	1	0.4	-1.68968	-3.22585	0.393021	0.794631	1	0	0.393102	1.31321	0.874972	0.963978	1	0	0.257525	1.19543	0.918353	0.993629	1
o__Clostridiales, 177927	0.6	2.80934	7.00965	0.23637	0.786005	1	0.4	2.55427	5.87371	0.289621	0.76967	1	0.6	-0.255069	-1.19339	0.855752	0.993871	1	0	0.699271	1.62368	0.803838	0.90078	1	0.6	-2.11007	-4.31712	0.295987	0.918974	1	0.4	-1.855	-3.61752	0.369108	0.993629	1
g__Coprococcus, 177765	0.4	2.3193	4.99089	0.308125	0.786005	1	0	0.437342	1.35411	0.874267	0.946826	1	0.4	-1.88196	-3.68574	0.348521	0.993871	1	0	0.694867	1.61874	0.796381	0.90078	1	0.4	-1.62443	-3.0832	0.394749	0.918974	1	0	0.257525	1.19543	0.916978	0.993629	1
o__Clostridiales, 177068	1.6	1.67587	3.19512	0.262143	0.786005	1	0.4	0.0734165	1.05221	0.964824	0.980684	1	1.6	-1.60245	-3.03659	0.276845	0.993871	1	0.4	-1.76903	-3.40825	0.422996	0.79601	1	1.6	-3.4449	-10.8898	0.0956852	0.918974	1	0.4	-1.84245	-3.58618	0.400993	0.993629	1
o__Clostridiales, 177022	0.4	2.37052	5.17127	0.317269	0.786005	1	0.4	2.52261	5.74621	0.287509	0.76967	1	0.4	0.152092	1.11118	0.91392	0.993871	1	0	0.697263	1.62143	0.801828	0.90078	1	0.4	-1.67326	-3.18934	0.407019	0.918974	1	0.4	-1.82535	-3.54392	0.366124	0.993629	1
o__Clostridiales, 176957	3.6	-2.28757	-4.88234	0.102458	0.786005	1	3.6	-1.64324	-3.12367	0.225242	0.76967	1	1.2	0.644332	1.56302	0.661888	0.993871	1	3.6	-4.76037	-27.1028	0.0230428	0.497221	1	0.8	-2.4728	-5.55119	0.255141	0.918974	1	1.2	-3.11713	-8.67659	0.145942	0.993629	1
o__Clostridiales, 176955	0.4	-2.08278	-4.23623	0.311342	0.786005	1	0.4	-1.9472	-3.85626	0.347824	0.76967	1	0	0.135578	1.09853	0.958008	0.993871	1	0.4	-1.68968	-3.22585	0.393266	0.794631	1	0	0.393102	1.31321	0.875011	0.963978	1	0	0.257525	1.19543	0.918378	0.993629	1
g__Oscillospira, 176836	7.6	-1.1738	-2.25605	0.304097	0.786005	1	7.6	-3.85749	-14.495	0.00661787	0.313963	1	3.8	-2.68369	-6.42495	0.0623087	0.993871	1	7.6	-1.15995	-2.2345	0.313942	0.779773	1	3.8	0.0138457	1.00964	0.990602	0.997549	1	3.2	2.69753	6.48691	0.0623638	0.993629	1
f__S24-7, 176444	0.4	2.32392	5.00691	0.326615	0.786005	1	0	0.43727	1.35404	0.877705	0.946826	1	0.4	-1.88665	-3.69776	0.371327	0.993871	1	0.4	2.61189	6.11304	0.269295	0.739844	1	0.4	0.287969	1.22092	0.837398	0.963978	1	0.4	2.17462	4.51467	0.301598	0.993629	1
o__Clostridiales, 175906	0.4	-2.08278	-4.23623	0.311567	0.786005	1	0.4	-1.9472	-3.85626	0.348044	0.76967	1	0	0.135578	1.09853	0.95802	0.993871	1	0.4	-1.68968	-3.22585	0.393505	0.794631	1	0	0.393102	1.31321	0.87505	0.963978	1	0	0.257525	1.19543	0.918403	0.993629	1
f__S24-7, 175646	2.6	2.50586	5.67989	0.104344	0.786005	1	1.4	1.46592	2.7624	0.360034	0.76967	1	2.6	-1.03994	-2.05614	0.436449	0.993871	1	1.8	2.19214	4.56983	0.161428	0.739844	1	2.6	-0.313722	-1.24291	0.808272	0.963978	1	1.8	0.726217	1.6543	0.594	0.993629	1
o__Clostridiales, 174847	0.4	2.31965	4.99213	0.308555	0.786005	1	0	0.437342	1.35411	0.874357	0.946826	1	0.4	-1.88231	-3.68665	0.34906	0.993871	1	0	0.694867	1.61874	0.796533	0.90078	1	0.4	-1.62479	-3.08397	0.395336	0.918974	1	0	0.257525	1.19543	0.917051	0.993629	1
f__S24-7, 174805	12.8	0.905171	1.87277	0.278737	0.786005	1	6.6	0.125528	1.09091	0.883064	0.946826	1	12.8	-0.779642	-1.71671	0.347169	0.993871	1	6.4	0.137688	1.10014	0.872206	0.936882	1	12.8	-0.767482	-1.7023	0.356248	0.918974	1	6.6	0.0121598	1.00846	0.988583	0.998551	1
f__S24-7, 174791	8.4	1.33389	2.52081	0.178388	0.786005	1	4.6	0.72657	1.6547	0.471366	0.888072	1	8.4	-0.60732	-1.52343	0.526226	0.993871	1	3.4	0.286043	1.21929	0.780814	0.90078	1	8.4	-1.04785	-2.06744	0.284209	0.918974	1	4.6	-0.440527	-1.3571	0.658356	0.993629	1
f__S24-7, 174757	5.6	1.38493	2.61159	0.201419	0.786005	1	2	0.227818	1.17106	0.841138	0.946826	1	5.6	-1.15711	-2.23011	0.276469	0.993871	1	2.4	0.526375	1.44031	0.640078	0.90078	1	5.6	-0.858555	-1.81322	0.414257	0.918974	1	2.4	0.298556	1.22991	0.787142	0.993629	1
f__S24-7, 174590	4	2.04656	4.13119	0.129033	0.786005	1	2.2	1.30395	2.46904	0.345119	0.76967	1	4	-0.742608	-1.6732	0.54655	0.993871	1	3.4	2.22699	4.68156	0.0991797	0.739844	1	4	0.180432	1.13322	0.880215	0.963978	1	3.4	0.92304	1.89611	0.454548	0.993629	1
o__Clostridiales, 174374	2.2	-4.30065	-19.7072	0.0427315	0.786005	1	3	0.288605	1.22146	0.811591	0.946826	1	3	4.58925	24.0715	0.0297601	0.993871	1	2.2	-0.2172	-1.16247	0.861304	0.935811	1	1.8	4.08345	16.9528	0.0552754	0.918974	1	3	-0.505804	-1.41991	0.67963	0.993629	1
f__S24-7, 174056	0.4	-2.08226	-4.2347	0.298878	0.786005	1	0.4	-1.94668	-3.85487	0.335631	0.76967	1	0	0.135578	1.09853	0.957326	0.993871	1	0.4	-1.68916	-3.22468	0.379934	0.794631	1	0	0.393102	1.31321	0.872847	0.963978	1	0	0.257525	1.19543	0.916978	0.993629	1
o__Clostridiales, 172464	0.4	-2.08233	-4.23491	0.298858	0.786005	1	0.4	-1.94675	-3.85506	0.335611	0.76967	1	0	0.135578	1.09853	0.957326	0.993871	1	0.4	-1.68923	-3.22484	0.379911	0.794631	1	0	0.393102	1.31321	0.872847	0.963978	1	0	0.257525	1.19543	0.916978	0.993629	1
f__Ruminococcaceae, 171396	6.6	-2.26848	-4.81814	0.0440812	0.786005	1	6.6	-2.8379	-7.14979	0.0168233	0.553167	1	2	-0.569424	-1.48393	0.649524	0.993871	1	6.6	-3.12242	-8.70846	0.0111738	0.302568	1	2	-0.853942	-1.80743	0.509423	0.963978	1	1.2	-0.284518	-1.218	0.832747	0.993629	1
o__Clostridiales, 171322	2.6	-1.36216	-2.57071	0.293688	0.786005	1	2.6	-1.632	-3.09943	0.223775	0.76967	1	1	-0.269838	-1.20567	0.847964	0.993871	1	2.6	-1.62904	-3.09307	0.228439	0.739844	1	1	-0.266875	-1.2032	0.850722	0.963978	1	0.8	0.00296351	1.00206	0.998379	0.999433	1
g__Ruminococcus, 171079	0.8	3.17115	9.00765	0.190169	0.786005	1	0.4	2.4325	5.39827	0.330168	0.76967	1	0.8	-0.738654	-1.66862	0.622852	0.993871	1	0.6	2.91948	7.56572	0.234987	0.739844	1	0.8	-0.251674	-1.19059	0.860765	0.963978	1	0.6	0.48698	1.40151	0.755207	0.993629	1
f__F16, 169901	5	1.12546	2.18172	0.227586	0.786005	1	2	-1.53667	-2.90124	0.188892	0.76967	1	5	-2.66214	-6.3297	0.0168257	0.993871	1	2.2	0.218725	1.1637	0.824502	0.911639	1	5	-0.90674	-1.8748	0.323959	0.918974	1	2.2	1.7554	3.37619	0.129835	0.993629	1
o__Clostridiales, 169845	9	1.40841	2.65445	0.133677	0.786005	1	12.4	2.00771	4.02144	0.0313121	0.76967	1	12.4	0.5993	1.51498	0.494811	0.993871	1	12.4	2.0346	4.0971	0.0293124	0.526115	1	12.4	0.626191	1.54348	0.476262	0.950459	1	12.4	0.0268907	1.01881	0.975399	0.997082	1
f__Ruminococcaceae, 168145	0.4	-2.08233	-4.23491	0.298858	0.786005	1	0.4	-1.94675	-3.85506	0.335611	0.76967	1	0	0.135578	1.09853	0.957326	0.993871	1	0.4	-1.68923	-3.22484	0.379911	0.794631	1	0	0.393102	1.31321	0.872847	0.963978	1	0	0.257525	1.19543	0.916978	0.993629	1
g__Lactobacillus, 167719	0.4	2.35284	5.1083	0.322388	0.786005	1	0	0.437113	1.35389	0.878168	0.946826	1	0.4	-1.91573	-3.77305	0.366161	0.993871	1	0.4	2.66437	6.33951	0.261052	0.739844	1	0.4	0.311527	1.24102	0.824909	0.963978	1	0.4	2.22726	4.68243	0.291624	0.993629	1
g__Oscillospira, 167509	2.4	-1.56399	-2.9567	0.248388	0.786005	1	2.4	-2.28433	-4.87139	0.125626	0.76967	1	0.8	-0.720344	-1.64757	0.648867	0.993871	1	2.4	-1.02201	-2.03075	0.440199	0.804533	1	1	0.541979	1.45597	0.703751	0.963978	1	1	1.26232	2.39882	0.417111	0.993629	1
f__Ruminococcaceae, 163430	0.4	-2.08233	-4.23491	0.298858	0.786005	1	0.4	-1.94675	-3.85506	0.335611	0.76967	1	0	0.135578	1.09853	0.957326	0.993871	1	0.4	-1.68923	-3.22484	0.379911	0.794631	1	0	0.393102	1.31321	0.872847	0.963978	1	0	0.257525	1.19543	0.916978	0.993629	1
o__Clostridiales, 130076	0.8	-2.8542	-7.23103	0.162677	0.786005	1	0.8	-2.7194	-6.58597	0.187135	0.76967	1	0	0.134807	1.09795	0.959136	0.993871	1	0.8	-2.4585	-5.49646	0.210909	0.739844	1	0	0.3957	1.31558	0.876976	0.963978	1	0	0.260893	1.19822	0.919138	0.993629	1
o__Clostridiales, 129394	2.2	-1.81714	-3.52382	0.136142	0.786005	1	2.2	-4.16041	-17.8816	0.0414826	0.76967	1	0.6	-2.34326	-5.0745	0.271938	0.993871	1	2.2	-1.20431	-2.30428	0.301721	0.758131	1	0.8	0.612828	1.52925	0.64267	0.963978	1	0.8	2.95609	7.7602	0.159824	0.993629	1
f__Ruminococcaceae, 110060	0.4	2.3193	4.99089	0.308125	0.786005	1	0	0.437342	1.35411	0.874267	0.946826	1	0.4	-1.88196	-3.68574	0.348521	0.993871	1	0	0.694867	1.61874	0.796381	0.90078	1	0.4	-1.62443	-3.0832	0.394749	0.918974	1	0	0.257525	1.19543	0.916978	0.993629	1
o__Clostridiales, 101248	0.4	2.31936	4.9911	0.308111	0.786005	1	0	0.437342	1.35411	0.874267	0.946826	1	0.4	-1.88201	-3.68589	0.348504	0.993871	1	0	0.694867	1.61874	0.796381	0.90078	1	0.4	-1.62449	-3.08333	0.394729	0.918974	1	0	0.257525	1.19543	0.916978	0.993629	1
f__Ruminococcaceae, 95424	0.6	-2.55814	-5.88947	0.205329	0.786005	1	0.6	-2.4227	-5.36173	0.234305	0.76967	1	0	0.135438	1.09843	0.958309	0.993871	1	0.6	-2.16457	-4.48332	0.26458	0.739844	1	0	0.393568	1.31364	0.875672	0.963978	1	0	0.25813	1.19593	0.918712	0.993629	1
o__Clostridiales, 36892	0.4	2.31965	4.99213	0.308602	0.786005	1	0	0.437342	1.35411	0.874365	0.946826	1	0.4	-1.88231	-3.68665	0.349119	0.993871	1	0	0.694867	1.61874	0.796547	0.90078	1	0.4	-1.62479	-3.08397	0.3954	0.918974	1	0	0.257525	1.19543	0.917058	0.993629	1
s__mastitidis, 13485	0.4	2.31965	4.99213	0.308645	0.786005	1	0	0.437342	1.35411	0.874373	0.946826	1	0.4	-1.88231	-3.68665	0.349172	0.993871	1	0	0.694867	1.61874	0.796559	0.90078	1	0.4	-1.62479	-3.08397	0.395458	0.918974	1	0	0.257525	1.19543	0.917064	0.993629	1
o__Clostridiales, 1571092	34.8	-0.934145	-1.91076	0.234269	0.786005	1	34.8	-2.01265	-4.03523	0.01225	0.433777	1	18.8	-1.07851	-2.11185	0.182112	0.993871	1	34.8	-1.7584	-3.38323	0.028058	0.526115	1	18.8	-0.824255	-1.77062	0.306102	0.918974	1	9	0.254252	1.19272	0.757393	0.993629	1
g__Oscillospira, 1844553	2.2	-1.40263	-2.64383	0.305289	0.786005	1	2.2	-0.509336	-1.42339	0.693707	0.946826	1	1.2	0.893294	1.85741	0.522313	0.993871	1	2.2	-3.6938	-12.9403	0.0728219	0.739844	1	0.8	-2.29117	-4.89454	0.280994	0.918974	1	1.2	-3.18447	-9.09118	0.125366	0.993629	1
o__Clostridiales, 1844565	22	-1.42547	-2.68602	0.147845	0.786005	1	22	-1.27845	-2.42578	0.194388	0.76967	1	8.8	0.147024	1.10728	0.883049	0.993871	1	22	-2.21398	-4.63954	0.0288069	0.526115	1	8.8	-0.78851	-1.72729	0.442464	0.918974	1	7.8	-0.935534	-1.9126	0.362239	0.993629	1
f__Lachnospiraceae, 1991255	1	3.2575	9.56325	0.172514	0.786005	1	0.6	2.87956	7.35926	0.235424	0.76967	1	1	-0.377939	-1.29948	0.783088	0.993871	1	0	0.70132	1.62599	0.805924	0.90078	1	1	-2.55618	-5.88148	0.209172	0.918974	1	0.6	-2.17824	-4.52601	0.295244	0.993629	1
g__Lactobacillus, 1995182	3	4.92751	30.4319	0.0385818	0.786005	1	4.2	5.56039	47.1892	0.0191777	0.588541	1	4.2	0.632873	1.55065	0.583941	0.993871	1	7.4	6.58537	96.0268	0.00535328	0.177098	1	7.4	1.65785	3.15546	0.144436	0.918974	1	7.4	1.02498	2.03493	0.359806	0.993629	1
f__Enterobacteriaceae, 668514	0.4	2.3196	4.99192	0.308055	0.786005	1	0	0.437342	1.35411	0.874267	0.946826	1	0.4	-1.88225	-3.6865	0.348435	0.993871	1	0	0.694867	1.61874	0.796381	0.90078	1	0.4	-1.62473	-3.08384	0.394652	0.918974	1	0	0.257525	1.19543	0.916978	0.993629	1
o__Clostridiales, 665703	0.4	-2.08233	-4.23491	0.298858	0.786005	1	0.4	-1.94675	-3.85506	0.335611	0.76967	1	0	0.135578	1.09853	0.957326	0.993871	1	0.4	-1.68923	-3.22484	0.379911	0.794631	1	0	0.393102	1.31321	0.872847	0.963978	1	0	0.257525	1.19543	0.916978	0.993629	1
g__Bacteroides, 2198356	0.8	3.25256	9.53055	0.168887	0.786005	1	0	0.436766	1.35357	0.880391	0.946826	1	0.8	-2.81579	-7.04107	0.18069	0.993871	1	0.4	2.51163	5.70265	0.305061	0.763205	1	0.8	-0.740927	-1.67125	0.600004	0.963978	1	0.4	2.07487	4.21305	0.345235	0.993629	1
o__RF39, 2286580	2	-2.33078	-5.03076	0.128602	0.786005	1	2	-1.43779	-2.70906	0.321379	0.76967	1	1.2	0.892981	1.85701	0.578445	0.993871	1	2	-1.35934	-2.56568	0.349171	0.794631	1	1	0.971433	1.96079	0.54599	0.963978	1	1.2	0.0784525	1.05588	0.959084	0.997082	1
o__Clostridiales, 839215	15.8	-1.20798	-2.31014	0.282337	0.786005	1	15.8	-1.03015	-2.04223	0.359059	0.76967	1	6.2	0.177837	1.13119	0.87565	0.993871	1	15.8	-1.65293	-3.14472	0.147553	0.739844	1	6.2	-0.44495	-1.36127	0.69991	0.963978	1	5.8	-0.622786	-1.53985	0.589412	0.993629	1
o__RF39, 1113282	1.8	1.79732	3.47574	0.177319	0.786005	1	0.8	0.908043	1.8765	0.521838	0.944901	1	1.8	-0.889278	-1.85225	0.446514	0.993871	1	0.4	-1.68923	-3.22484	0.42226	0.79601	1	1.8	-3.48655	-11.2087	0.0731408	0.918974	1	0.8	-2.59727	-6.05141	0.195208	0.993629	1
f__Ruminococcaceae, 1105016	0.4	-2.08245	-4.23525	0.298827	0.786005	1	0.4	-1.94687	-3.85537	0.335578	0.76967	1	0	0.135578	1.09853	0.957326	0.993871	1	0.4	-1.68934	-3.2251	0.379874	0.794631	1	0	0.393102	1.31321	0.872847	0.963978	1	0	0.257525	1.19543	0.916978	0.993629	1
s__gnavus, 2797559	0.8	-2.93745	-7.66053	0.160673	0.786005	1	2.4	1.49845	2.8254	0.199435	0.76967	1	2.4	4.4359	21.6441	0.0278227	0.993871	1	0.8	-0.639494	-1.55778	0.649014	0.90078	1	0.4	2.29795	4.91759	0.287971	0.918974	1	2.4	-2.13795	-4.40136	0.0966267	0.993629	1
s__schaedleri, 2937207	19.6	-1.05171	-2.07299	0.232776	0.786005	1	19.6	-1.19098	-2.28309	0.179007	0.76967	1	10.8	-0.139273	-1.10135	0.876351	0.993871	1	19.6	-0.685787	-1.60858	0.435799	0.803144	1	11.6	0.365924	1.28871	0.680583	0.963978	1	11.6	0.505198	1.41932	0.571886	0.993629	1
g__Prevotella, 741701	0.4	2.3196	4.99192	0.308055	0.786005	1	0	0.437342	1.35411	0.874267	0.946826	1	0.4	-1.88225	-3.6865	0.348435	0.993871	1	0	0.694867	1.61874	0.796381	0.90078	1	0.4	-1.62473	-3.08384	0.394652	0.918974	1	0	0.257525	1.19543	0.916978	0.993629	1
o__Clostridiales, 637934	2	-1.3569	-2.56135	0.264415	0.786005	1	2	-1.16479	-2.24201	0.336501	0.76967	1	0.8	0.192113	1.14244	0.88359	0.993871	1	2	-3.75065	-13.4604	0.0570448	0.705541	1	0.8	-2.39374	-5.25519	0.239261	0.918974	1	0.8	-2.58585	-6.00371	0.203108	0.993629	1
g__Dorea, 3392840	1.2	3.72159	13.192	0.119564	0.786005	1	1.2	3.79075	13.8398	0.113467	0.76967	1	1.2	0.0691615	1.04911	0.956512	0.993871	1	2.8	5.05288	33.1946	0.0320747	0.546853	1	2.8	1.33129	2.51627	0.265543	0.918974	1	2.8	1.26213	2.39849	0.29449	0.993629	1
f__Ruminococcaceae, 3412718	1.4	-2.30018	-4.9252	0.156029	0.786005	1	1.4	-0.971408	-1.96075	0.50861	0.934835	1	1.2	1.32878	2.51189	0.427335	0.993871	1	1.6	-0.305744	-1.23606	0.830382	0.915541	1	1.6	1.99444	3.98461	0.223097	0.918974	1	1.6	0.665663	1.5863	0.654339	0.993629	1
o__RF39, 3584772	0.4	2.3193	4.99089	0.308125	0.786005	1	0	0.437342	1.35411	0.874267	0.946826	1	0.4	-1.88196	-3.68574	0.348521	0.993871	1	0	0.694867	1.61874	0.796381	0.90078	1	0.4	-1.62443	-3.0832	0.394749	0.918974	1	0	0.257525	1.19543	0.916978	0.993629	1
f__Lachnospiraceae, 3694603	18	1.06568	2.09315	0.150584	0.786005	1	13.6	0.850283	1.80285	0.254309	0.76967	1	18	-0.215395	-1.16102	0.765599	0.993871	1	14	0.920901	1.8933	0.217331	0.739844	1	18	-0.144778	-1.10556	0.841305	0.963978	1	14	0.0706176	1.05017	0.922696	0.993629	1
o__Clostridiales, 1107303	0.6	2.67454	6.38434	0.274426	0.786005	1	0.4	2.3928	5.25176	0.337018	0.76967	1	0.6	-0.281735	-1.21566	0.855962	0.993871	1	0.8	3.37333	10.3627	0.162187	0.739844	1	0.8	0.698791	1.62314	0.62312	0.963978	1	0.8	0.980526	1.97319	0.512852	0.993629	1
g__Sutterella, 1105376	828.6	-0.750621	-1.68252	0.275783	0.786005	1	828.6	-1.15961	-2.23397	0.0923726	0.76967	1	518.8	-0.408991	-1.32776	0.552872	0.993871	1	828.6	-1.44995	-2.73199	0.0354153	0.568703	1	518.8	-0.699332	-1.62375	0.31041	0.918974	1	356.2	-0.290341	-1.22293	0.673778	0.993629	1
f__Erysipelotrichaceae, 828435	0.8	-2.85955	-7.25787	0.194086	0.786005	1	1.4	0.730244	1.65892	0.602141	0.946826	1	1.4	3.58979	12.0402	0.0953291	0.993871	1	0.8	-0.464766	-1.38009	0.763811	0.90078	1	0.4	2.39478	5.25897	0.287169	0.918974	1	1.4	-1.19501	-2.28946	0.417829	0.993629	1
o__Clostridiales, 3998912	65.2	-1.08999	-2.12873	0.322079	0.786005	1	65.2	-1.20657	-2.30788	0.273348	0.76967	1	65.2	-0.116576	-1.08416	0.915826	0.993871	1	65.2	-1.21083	-2.31471	0.271816	0.741232	1	65.2	-0.120843	-1.08737	0.912786	0.971539	1	58	-0.00426726	-1.00296	0.996916	0.999433	1
s__ovatus, 4256470	0.4	2.3193	4.99089	0.308125	0.786005	1	0	0.437342	1.35411	0.874267	0.946826	1	0.4	-1.88196	-3.68574	0.348521	0.993871	1	0	0.694867	1.61874	0.796381	0.90078	1	0.4	-1.62443	-3.0832	0.394749	0.918974	1	0	0.257525	1.19543	0.916978	0.993629	1
g__Oscillospira, 4296701	0.4	2.31936	4.9911	0.308111	0.786005	1	0	0.437342	1.35411	0.874267	0.946826	1	0.4	-1.88201	-3.68589	0.348504	0.993871	1	0	0.694867	1.61874	0.796381	0.90078	1	0.4	-1.62449	-3.08333	0.394729	0.918974	1	0	0.257525	1.19543	0.916978	0.993629	1
s__indistinctus, 4331760	1	3.34545	10.1644	0.183289	0.786005	1	2.2	4.31953	19.9668	0.081543	0.76967	1	2.2	0.97408	1.96439	0.50172	0.993871	1	0.8	3.36886	10.3307	0.182628	0.739844	1	1	0.0234114	1.01636	0.987796	0.997182	1	2.2	-0.950669	-1.93277	0.51888	0.993629	1
f__Ruminococcaceae, 4363614	1.4	3.77017	13.6437	0.100681	0.786005	1	0	0.437089	1.35387	0.878942	0.946826	1	1.4	-3.33308	-10.0776	0.10029	0.993871	1	0	0.697346	1.62152	0.80343	0.90078	1	1.4	-3.07282	-8.41416	0.111445	0.918974	1	0	0.260257	1.19769	0.919835	0.993629	1
f__Coriobacteriaceae, 4374046	0.6	2.69713	6.48513	0.270126	0.786005	1	0	0.436585	1.3534	0.881818	0.946826	1	0.6	-2.26055	-4.79174	0.302851	0.993871	1	1	3.65055	12.5581	0.127849	0.739844	1	1	0.953413	1.93645	0.493358	0.963978	1	1	3.21396	9.27896	0.133144	0.993629	1
o__Clostridiales, 4383135	0.4	-2.08256	-4.23557	0.298798	0.786005	1	0.4	-1.94698	-3.85566	0.335547	0.76967	1	0	0.135578	1.09853	0.957326	0.993871	1	0.4	-1.68945	-3.22534	0.379839	0.794631	1	0	0.393102	1.31321	0.872847	0.963978	1	0	0.257525	1.19543	0.916978	0.993629	1
o__Clostridiales, 730939	4.4	-1.49224	-2.81325	0.168104	0.786005	1	4.4	-1.25278	-2.383	0.244581	0.76967	1	1.8	0.239455	1.18055	0.833607	0.993871	1	4.4	-1.62773	-3.09027	0.145031	0.739844	1	1.6	-0.135496	-1.09847	0.908427	0.971539	1	1.8	-0.37495	-1.2968	0.749122	0.993629	1
o__Clostridiales, 4416396	0.4	2.31951	4.99162	0.320611	0.786005	1	0.4	2.47868	5.57388	0.288688	0.76967	1	0.4	0.159173	1.11665	0.906652	0.993871	1	0	0.694867	1.61874	0.800094	0.90078	1	0.4	-1.62464	-3.08366	0.41158	0.918974	1	0.4	-1.78381	-3.44335	0.367513	0.993629	1
o__Clostridiales, 4416434	2.6	2.36664	5.1574	0.114943	0.786005	1	0.4	0.230405	1.17316	0.891776	0.9488	1	2.6	-2.13624	-4.39614	0.140312	0.993871	1	1	1.19459	2.2888	0.451809	0.813479	1	2.6	-1.17205	-2.25332	0.375855	0.918974	1	1	0.964185	1.95096	0.530715	0.993629	1
s__seeligeri, 4416988	0.4	-2.08226	-4.2347	0.298878	0.786005	1	0.4	-1.94668	-3.85487	0.335631	0.76967	1	0	0.135578	1.09853	0.957326	0.993871	1	0.4	-1.68916	-3.22468	0.379934	0.794631	1	0	0.393102	1.31321	0.872847	0.963978	1	0	0.257525	1.19543	0.916978	0.993629	1
o__Clostridiales, 4430503	4	-3.05845	-8.33076	0.0284974	0.786005	1	4	-1.06679	-2.09477	0.372	0.776342	1	1.8	1.99165	3.97693	0.164261	0.993871	1	4	-1.40317	-2.64483	0.252064	0.739844	1	1.4	1.65528	3.14983	0.255978	0.918974	1	1.8	-0.336379	-1.26258	0.790396	0.993629	1
o__RF39, 4432841	23	-1.4399	-2.71302	0.0994118	0.786005	1	23	-1.71321	-3.2789	0.0523708	0.76967	1	9.2	-0.273313	-1.20858	0.760735	0.993871	1	23	-1.9564	-3.88093	0.0284255	0.526115	1	9.2	-0.516502	-1.43048	0.569081	0.963978	1	6.6	-0.243189	-1.18361	0.79062	0.993629	1
f__Lachnospiraceae, 4440624	5.4	1.44091	2.71492	0.214503	0.786005	1	2	-0.426663	-1.34412	0.732635	0.946826	1	5.4	-1.86757	-3.64919	0.115382	0.993871	1	3	0.90724	1.87545	0.443066	0.807677	1	5.4	-0.533672	-1.44761	0.632608	0.963978	1	3	1.3339	2.52084	0.26937	0.993629	1
g__Prevotella, 4449524	0.4	2.31965	4.99213	0.308679	0.786005	1	0	0.437342	1.35411	0.874379	0.946826	1	0.4	-1.88231	-3.68665	0.349215	0.993871	1	0	0.694867	1.61874	0.79657	0.90078	1	0.4	-1.62479	-3.08397	0.395506	0.918974	1	0	0.257525	1.19543	0.917069	0.993629	1
o__Clostridiales, 4459184	0.4	2.31936	4.9911	0.322519	0.786005	1	0	0.437342	1.35411	0.876784	0.946826	1	0.4	-1.88201	-3.68589	0.36633	0.993871	1	0.4	2.59991	6.06248	0.266624	0.739844	1	0.4	0.280552	1.21466	0.837078	0.963978	1	0.4	2.16257	4.47711	0.2982	0.993629	1
o__Clostridiales, 4460604	0.4	-2.08233	-4.23491	0.317407	0.786005	1	0.4	-1.94675	-3.85506	0.353759	0.76967	1	0	0.135578	1.09853	0.958332	0.993871	1	0.4	0.215801	1.16135	0.876503	0.936882	1	0.4	2.29813	4.91821	0.265228	0.918974	1	0.4	2.16255	4.47707	0.298362	0.993629	1
f__Lachnospiraceae, 4471351	0.6	2.69577	6.47899	0.279117	0.786005	1	1.4	3.89306	14.8569	0.108671	0.76967	1	1.4	1.19729	2.29308	0.405548	0.993871	1	0.8	3.37836	10.3989	0.16951	0.739844	1	0.8	0.68259	1.60502	0.647621	0.963978	1	1.4	-0.514699	-1.4287	0.709989	0.993629	1
o__Clostridiales, 4483585	0.4	-2.08226	-4.2347	0.327904	0.786005	1	0.4	0.0947493	1.06788	0.948371	0.97244	1	0.4	2.17701	4.52215	0.302901	0.993871	1	0.4	0.215874	1.16141	0.88214	0.937057	1	0.4	2.29813	4.91821	0.275665	0.918974	1	0.4	0.121124	1.08758	0.932673	0.993629	1
o__Clostridiales, M70574:46:000000000-J6F43:1:2106:24424:20405 1:N:0:ACCTGGAT+TTCTAGAC/M70574:46:000000000-J6F43:1:2106:24424:20405 2:N:0:ACCTGGAT+TTCTAGAC	446.4	-1.36501	-2.57578	0.156554	0.786005	1	446.4	-1.5682	-2.96534	0.103687	0.76967	1	298.6	-0.203188	-1.15124	0.833092	0.993871	1	446.4	-1.95379	-3.87392	0.0427271	0.608286	1	298.6	-0.588782	-1.50398	0.54162	0.963978	1	232.8	-0.385594	-1.3064	0.689431	0.993629	1
f__Coriobacteriaceae, M70574:46:000000000-J6F43:1:1116:11294:24015 1:N:0:GTGCCATA+TAACTCTG/M70574:46:000000000-J6F43:1:1116:11294:24015 2:N:0:GTGCCATA+TAACTCTG	18.4	2.41663	5.33921	0.0231545	0.786005	1	21	2.75644	6.75725	0.00951127	0.410471	1	21	0.339809	1.26559	0.736192	0.993871	1	34.2	3.66056	12.6456	0.000548927	0.0329595	0.758068	34.2	1.24393	2.36844	0.215692	0.918974	1	34.2	0.904125	1.87141	0.36759	0.993629	1
o__YS2, M70574:46:000000000-J6F43:1:1115:15368:11494 1:N:0:ACCTGGAT+CACTAATG/M70574:46:000000000-J6F43:1:1115:15368:11494 2:N:0:ACCTGGAT+CACTAATG	9.8	1.22903	2.34409	0.300897	0.786005	1	4	-0.141185	-1.10281	0.908154	0.959651	1	9.8	-1.37021	-2.58509	0.249318	0.993871	1	3.6	0.241011	1.18182	0.842697	0.923	1	9.8	-0.988018	-1.98346	0.402368	0.918974	1	4	0.382195	1.30332	0.753261	0.993629	1
g__Oscillospira, M70574:46:000000000-J6F43:1:2107:8686:17572 1:N:0:ACCTGGAT+TAACTCTG/M70574:46:000000000-J6F43:1:2107:8686:17572 2:N:0:ACCTGGAT+TAACTCTG	4.6	5.22147	37.3094	0.0355166	0.786005	1	4.2	5.26815	38.5364	0.0340284	0.76967	1	4.6	0.0466818	1.03289	0.972536	0.994744	1	3.8	5.44633	43.6021	0.0283529	0.526115	1	4.6	0.224857	1.16866	0.868099	0.963978	1	4.2	0.178175	1.13145	0.895548	0.993629	1
g__Oscillospira, M70574:46:000000000-J6F43:1:1101:25914:22060 1:N:0:ACCTGGAT+TAAGATCC/M70574:46:000000000-J6F43:1:1101:25914:22060 2:N:0:ACCTGGAT+TAAGATCC	3	4.96956	31.3318	0.0331986	0.786005	1	4.6	5.68312	51.3795	0.0144941	0.500408	1	4.6	0.713562	1.63985	0.497258	0.993871	1	1.6	4.43678	21.6573	0.0594109	0.719706	1	3	-0.532776	-1.44671	0.632399	0.963978	1	4.6	-1.24634	-2.37239	0.255045	0.993629	1
o__Clostridiales, M70574:46:000000000-J6F43:1:1102:12538:8790 1:N:0:ACCTGGAT+TAAGATCC/M70574:46:000000000-J6F43:1:1102:12538:8790 2:N:0:ACCTGGAT+TAAGATCC	1.4	3.81774	14.1012	0.113429	0.786005	1	2.8	4.84082	28.6571	0.0423845	0.76967	1	2.8	1.02308	2.03225	0.409761	0.993871	1	3.2	5.18373	36.3461	0.0294021	0.526115	1	3.2	1.36598	2.57752	0.267352	0.918974	1	3.2	0.342909	1.26831	0.771012	0.993629	1
f__S24-7, M70574:46:000000000-J6F43:1:1103:10400:14755 1:N:0:ACCTGGAT+CCGATCTT/M70574:46:000000000-J6F43:1:1103:10400:14755 2:N:0:ACCTGGAT+CCGATCTT	0.8	3.05025	8.28355	0.184987	0.786005	1	0	0.437029	1.35381	0.877709	0.946826	1	0.8	-2.61322	-6.11868	0.198905	0.993871	1	0	0.697956	1.6222	0.801123	0.90078	1	0.8	-2.35229	-5.10636	0.224389	0.918974	1	0	0.260927	1.19825	0.918609	0.993629	1
o__Clostridiales, M70574:46:000000000-J6F43:1:1103:22693:12471 1:N:0:ACCTGGAT+TAACTCTG/M70574:46:000000000-J6F43:1:1103:22693:12471 2:N:0:ACCTGGAT+TAACTCTG	1.6	3.84721	14.3922	0.119869	0.786005	1	0.4	2.40565	5.29873	0.352026	0.76967	1	1.6	-1.44156	-2.71615	0.36395	0.993871	1	1.4	3.81638	14.0878	0.124767	0.739844	1	1.6	-0.0308349	-1.0216	0.982694	0.996175	1	1.4	1.41073	2.65872	0.380122	0.993629	1
f__S24-7, M70574:46:000000000-J6F43:1:1104:23394:18828 1:N:0:ACCTGGAT+TTCTAGAC/M70574:46:000000000-J6F43:1:1104:23394:18828 2:N:0:ACCTGGAT+TTCTAGAC	0.8	-2.8542	-7.23103	0.162532	0.786005	1	0.8	-2.7194	-6.58597	0.186987	0.76967	1	0	0.134807	1.09795	0.959127	0.993871	1	0.8	-2.4585	-5.49646	0.210738	0.739844	1	0	0.3957	1.31558	0.876949	0.963978	1	0	0.260893	1.19822	0.919121	0.993629	1
s__gnavus, M70574:46:000000000-J6F43:1:1107:14578:21647 1:N:0:ACCTGGAT+TAACTCTG/M70574:46:000000000-J6F43:1:1107:14578:21647 2:N:0:ACCTGGAT+TAACTCTG	2.4	2.19589	4.58171	0.0897428	0.786005	1	2.2	2.23655	4.71267	0.085291	0.76967	1	2.4	0.0406595	1.02858	0.967447	0.9941	1	3.6	2.98726	7.92964	0.0190473	0.438406	1	3.6	0.79137	1.73072	0.411017	0.918974	1	3.6	0.750711	1.68262	0.43901	0.993629	1
f__F16, M70574:46:000000000-J6F43:1:1107:17426:19639 1:N:0:ACCTGGAT+CACTAATG/M70574:46:000000000-J6F43:1:1107:17426:19639 2:N:0:ACCTGGAT+CACTAATG	1	3.29337	9.80398	0.17225	0.786005	1	0.8	3.12863	8.74603	0.198639	0.76967	1	1	-0.164739	-1.12096	0.904998	0.993871	1	0	0.702787	1.62765	0.807006	0.90078	1	1	-2.59058	-6.02341	0.209302	0.918974	1	0.8	-2.42584	-5.37342	0.245351	0.993629	1
f__Clostridiaceae, M70574:46:000000000-J6F43:1:1119:17549:16019 1:N:0:TGAATCCG+CCGATCTT/M70574:46:000000000-J6F43:1:1119:17549:16019 2:N:0:TGAATCCG+CCGATCTT	0.8	3.2507	9.51829	0.165782	0.786005	1	0	0.436779	1.35358	0.879756	0.946826	1	0.8	-2.81392	-7.03195	0.176745	0.993871	1	0	0.700541	1.62511	0.803709	0.90078	1	0.8	-2.55016	-5.857	0.19928	0.918974	1	0	0.263762	1.20061	0.919324	0.993629	1
o__YS2, M70574:46:000000000-J6F43:1:1119:5073:8733 1:N:0:ACCTGGAT+TAACTCTG/M70574:46:000000000-J6F43:1:1119:5073:8733 2:N:0:ACCTGGAT+TAACTCTG	3.8	-2.28415	-4.87079	0.115501	0.786005	1	3.8	-2.51791	-5.7275	0.0941624	0.76967	1	0.8	-0.233751	-1.17589	0.885642	0.993871	1	3.8	-4.57325	-23.8059	0.0304774	0.526115	1	0.8	-2.28909	-4.88748	0.298391	0.918974	1	0.6	-2.05534	-4.15641	0.358118	0.993629	1
g__Ruminococcus, M70574:46:000000000-J6F43:1:2101:15230:9450 1:N:0:ACCTGGAT+CCGATCTT/M70574:46:000000000-J6F43:1:2101:15230:9450 2:N:0:ACCTGGAT+CCGATCTT	1.2	3.61329	12.238	0.119715	0.786005	1	0.8	3.29498	9.81493	0.160809	0.76967	1	1.2	-0.318315	-1.24687	0.789927	0.993871	1	0	0.696243	1.62028	0.804817	0.90078	1	1.2	-2.91705	-7.553	0.136854	0.918974	1	0.8	-2.59874	-6.05755	0.192315	0.993629	1
o__Clostridiales, M70574:46:000000000-J6F43:1:2105:13177:10169 1:N:0:ACCTGGAT+CCGATCTT/M70574:46:000000000-J6F43:1:2105:13177:10169 2:N:0:ACCTGGAT+CCGATCTT	0.8	3.0369	8.20728	0.2036	0.786005	1	0.4	2.54518	5.83683	0.298053	0.76967	1	0.8	-0.49172	-1.40612	0.730949	0.993871	1	0.8	3.33184	10.069	0.162562	0.739844	1	0.8	0.29494	1.22683	0.823818	0.963978	1	0.8	0.78666	1.72508	0.580974	0.993629	1
s__pseudolongum, M70574:46:000000000-J6F43:1:2106:15143:12063 1:N:0:ACCTGGAT+CCACAGGT/M70574:46:000000000-J6F43:1:2106:15143:12063 2:N:0:ACCTGGAT+CCACAGGT	1.4	3.89394	14.8659	0.105372	0.786005	1	3.2	5.12239	34.8331	0.0310172	0.76967	1	3.2	1.22845	2.34315	0.312227	0.993871	1	8	6.71133	104.788	0.0044124	0.160356	1	8	2.81739	7.04888	0.0170269	0.918974	1	8	1.58894	3.00829	0.155628	0.993629	1
o__RF39, M70574:46:000000000-J6F43:1:2106:8590:14641 1:N:0:ACCTGGAT+TAAGATCC/M70574:46:000000000-J6F43:1:2106:8590:14641 2:N:0:ACCTGGAT+TAAGATCC	1	3.44918	10.9221	0.150645	0.786005	1	1.2	3.70845	13.0724	0.121494	0.76967	1	1.2	0.25927	1.19687	0.841096	0.993871	1	1	3.71296	13.1133	0.121765	0.739844	1	1	0.263785	1.20062	0.839421	0.963978	1	1.2	0.00451524	1.00313	0.997213	0.999433	1
f__Mycoplasmataceae, M70574:46:000000000-J6F43:1:2107:8614:12464 1:N:0:GTGCCATA+CACTAATG/M70574:46:000000000-J6F43:1:2107:8614:12464 2:N:0:GTGCCATA+CACTAATG	1.4	-1.5007	-2.82981	0.279655	0.786005	1	1.4	-0.11514	-1.08308	0.926805	0.97244	1	1.4	1.38556	2.61274	0.319121	0.993871	1	1.4	-3.47487	-11.1183	0.0888902	0.739844	1	0.6	-1.97416	-3.929	0.353917	0.918974	1	1.4	-3.35973	-10.2655	0.100285	0.993629	1
f__Ruminococcaceae, M70574:46:000000000-J6F43:1:2110:24276:2719 1:N:0:ACCTGGAT+TAACTCTG/M70574:46:000000000-J6F43:1:2110:24276:2719 2:N:0:ACCTGGAT+TAACTCTG	1.8	4.15818	17.854	0.0742192	0.786005	1	1	3.65612	12.6067	0.120856	0.76967	1	1.8	-0.502059	-1.41623	0.666371	0.993871	1	0	0.697385	1.62156	0.806109	0.90078	1	1.8	-3.46079	-11.0104	0.0786776	0.918974	1	1	-2.95873	-7.77441	0.139232	0.993629	1
f__S24-7, M70574:46:000000000-J6F43:1:2111:11125:20336 1:N:0:GTGCCATA+TAACTCTG/M70574:46:000000000-J6F43:1:2111:11125:20336 2:N:0:GTGCCATA+TAACTCTG	0.8	3.33393	10.0835	0.154135	0.786005	1	0	0.436694	1.3535	0.879738	0.946826	1	0.8	-2.89724	-7.44998	0.162909	0.993871	1	0	0.701448	1.62614	0.803366	0.90078	1	0.8	-2.63248	-6.20092	0.183486	0.918974	1	0	0.264755	1.20143	0.918978	0.993629	1
f__Ruminococcaceae, M70574:46:000000000-J6F43:1:2111:16676:21047 1:N:0:GTGCCATA+AGGTCATT/M70574:46:000000000-J6F43:1:2111:16676:21047 2:N:0:GTGCCATA+AGGTCATT	0.4	-2.14797	-4.43204	0.322773	0.786005	1	0.4	-2.01376	-4.03832	0.357535	0.76967	1	0	0.134215	1.0975	0.959956	0.993871	1	0.8	0.925177	1.89892	0.512321	0.876723	1	0.8	3.07315	8.41608	0.140585	0.918974	1	0.8	2.93893	7.66844	0.162157	0.993629	1
g__Ruminococcus, M70574:46:000000000-J6F43:1:2111:24600:12951 1:N:0:GTGCCATA+CCGATCTT/M70574:46:000000000-J6F43:1:2111:24600:12951 2:N:0:GTGCCATA+CCGATCTT	0.8	3.16575	8.97397	0.173842	0.786005	1	0	0.436855	1.35365	0.878948	0.946826	1	0.8	-2.72889	-6.62946	0.186036	0.993871	1	0	0.699742	1.62421	0.802608	0.90078	1	0.8	-2.466	-5.52512	0.209831	0.918974	1	0	0.262887	1.19988	0.918957	0.993629	1
o__YS2, M70574:46:000000000-J6F43:1:2113:7712:8126 1:N:0:TGAATCCG+CCGATCTT/M70574:46:000000000-J6F43:1:2113:7712:8126 2:N:0:TGAATCCG+CCGATCTT	0.8	3.25697	9.55973	0.167395	0.786005	1	0.4	2.39247	5.25057	0.328443	0.76967	1	0.8	-0.864496	-1.8207	0.540283	0.993871	1	0	0.701017	1.62565	0.804364	0.90078	1	0.8	-2.55595	-5.88056	0.201746	0.918974	1	0.4	-1.69146	-3.22983	0.421974	0.993629	1
s__pseudolongum, M70574:46:000000000-J6F43:1:2114:9361:9969 1:N:0:ACCTGGAT+TAACTCTG/M70574:46:000000000-J6F43:1:2114:9361:9969 2:N:0:ACCTGGAT+TAACTCTG	0.8	3.06984	8.39679	0.184466	0.786005	1	0	0.436966	1.35375	0.878191	0.946826	1	0.8	-2.63287	-6.2026	0.198471	0.993871	1	0	0.698595	1.62292	0.801719	0.90078	1	0.8	-2.37124	-5.17387	0.223958	0.918974	1	0	0.261629	1.19883	0.918764	0.993629	1
o__Clostridiales, M70574:46:000000000-J6F43:1:2115:17766:18889 1:N:0:ACCTGGAT+TTCTAGAC/M70574:46:000000000-J6F43:1:2115:17766:18889 2:N:0:ACCTGGAT+TTCTAGAC	1.6	-1.7799	-3.43403	0.221606	0.786005	1	1.6	-1.22073	-2.33064	0.378825	0.784345	1	0.6	0.559175	1.47343	0.721699	0.993871	1	1.6	-1.53952	-2.90699	0.291117	0.75006	1	0.4	0.24038	1.1813	0.882985	0.963978	1	0.6	-0.318795	-1.24729	0.839278	0.993629	1
g__Allobaculum, M70574:46:000000000-J6F43:1:2115:6953:19808 1:N:0:GTGCCATA+AGGTCATT/M70574:46:000000000-J6F43:1:2115:6953:19808 2:N:0:GTGCCATA+AGGTCATT	1.6	4.02066	16.2307	0.0937004	0.786005	1	2.2	4.43922	21.6939	0.0632708	0.76967	1	2.2	0.41856	1.33659	0.734797	0.993871	1	1.2	3.88095	14.7327	0.108046	0.739844	1	1.6	-0.139707	-1.10168	0.913284	0.971539	1	2.2	-0.558267	-1.4725	0.659469	0.993629	1
g__Bacteroides, M70574:46:000000000-J6F43:1:2116:16068:10680 1:N:0:ACCTGGAT+TAACTCTG/M70574:46:000000000-J6F43:1:2116:16068:10680 2:N:0:ACCTGGAT+TAACTCTG	0.8	3.06984	8.39679	0.184339	0.786005	1	0	0.436966	1.35375	0.878168	0.946826	1	0.8	-2.63287	-6.2026	0.198309	0.993871	1	0	0.698595	1.62292	0.801679	0.90078	1	0.8	-2.37124	-5.17387	0.223772	0.918974	1	0	0.261629	1.19883	0.918745	0.993629	1
o__Clostridiales, M70574:46:000000000-J6F43:1:1101:15353:23495 1:N:0:ACCTGGAT+CCGATCTT/M70574:46:000000000-J6F43:1:1101:15353:23495 2:N:0:ACCTGGAT+CCGATCTT	1	3.34193	10.1396	0.16658	0.786005	1	0.4	2.5291	5.7721	0.310314	0.76967	1	1	-0.812836	-1.75666	0.581856	0.993871	1	2	4.3723	20.7106	0.0664275	0.739844	1	2	1.03037	2.04254	0.420903	0.918974	1	2	1.8432	3.58805	0.194238	0.993629	1
f__Ruminococcaceae, M70574:46:000000000-J6F43:1:1101:27451:7698 1:N:0:GTGCCATA+TAAGATCC/M70574:46:000000000-J6F43:1:1101:27451:7698 2:N:0:GTGCCATA+TAAGATCC	0.8	3.00571	8.03175	0.219395	0.786005	1	2.4	4.80762	28.0052	0.0431436	0.76967	1	2.4	1.80191	3.48681	0.169115	0.993871	1	0.8	3.31032	9.91985	0.175586	0.739844	1	0.8	0.304605	1.23508	0.831073	0.963978	1	2.4	-1.4973	-2.82315	0.25091	0.993629	1
f__Lachnospiraceae, M70574:46:000000000-J6F43:1:1101:7778:9063 1:N:0:GTGCCATA+CCACAGGT/M70574:46:000000000-J6F43:1:1101:7778:9063 2:N:0:GTGCCATA+CCACAGGT	0.4	2.44203	5.43405	0.314535	0.786005	1	0	0.436703	1.35351	0.880368	0.946826	1	0.4	-2.00533	-4.01479	0.356575	0.993871	1	0.6	3.27777	9.69858	0.168078	0.739844	1	0.6	0.835745	1.78478	0.551208	0.963978	1	0.6	2.84107	7.16551	0.180017	0.993629	1
f__Ruminococcaceae, M70574:46:000000000-J6F43:1:1102:12368:7776 1:N:0:ACCTGGAT+TAAGATCC/M70574:46:000000000-J6F43:1:1102:12368:7776 2:N:0:ACCTGGAT+TAAGATCC	1.8	1.79638	3.47346	0.242444	0.786005	1	1	1.15174	2.22182	0.469332	0.888072	1	1.8	-0.644636	-1.56334	0.635614	0.993871	1	1	1.1471	2.21469	0.473659	0.833278	1	1.8	-0.649271	-1.56838	0.635837	0.963978	1	1	-0.00463551	-1.00322	0.997418	0.999433	1
f__S24-7, M70574:46:000000000-J6F43:1:1102:17853:21728 1:N:0:TGAATCCG+TTCTAGAC/M70574:46:000000000-J6F43:1:1102:17853:21728 2:N:0:TGAATCCG+TTCTAGAC	0.6	-2.57889	-5.97479	0.208269	0.786005	1	0.6	-2.44381	-5.44077	0.23697	0.76967	1	0	0.135076	1.09815	0.958809	0.993871	1	0.6	-2.1841	-4.54444	0.267731	0.739844	1	0	0.394786	1.31475	0.876496	0.963978	1	0	0.25971	1.19724	0.919005	0.993629	1
g__Coprococcus, M70574:46:000000000-J6F43:1:1102:28392:12607 1:N:0:GTGCCATA+CCGATCTT/M70574:46:000000000-J6F43:1:1102:28392:12607 2:N:0:GTGCCATA+CCGATCTT	1	3.45628	10.976	0.141781	0.786005	1	0	0.436692	1.3535	0.880407	0.946826	1	1	-3.01959	-8.10937	0.148614	0.993871	1	0	0.701469	1.62616	0.804502	0.90078	1	1	-2.75481	-6.74965	0.167147	0.918974	1	0	0.264777	1.20145	0.919518	0.993629	1
f__S24-7, M70574:46:000000000-J6F43:1:1102:6414:9397 1:N:0:ACCTGGAT+TAACTCTG/M70574:46:000000000-J6F43:1:1102:6414:9397 2:N:0:ACCTGGAT+TAACTCTG	1	3.31349	9.9417	0.161322	0.786005	1	0.4	2.39572	5.26238	0.329622	0.76967	1	1	-0.917777	-1.8892	0.518508	0.993871	1	0	0.70072	1.62532	0.805029	0.90078	1	1	-2.61277	-6.11678	0.193623	0.918974	1	0.4	-1.695	-3.23776	0.423364	0.993629	1
o__Clostridiales, M70574:46:000000000-J6F43:1:1102:9530:15390 1:N:0:ACCTGGAT+TTCTAGAC/M70574:46:000000000-J6F43:1:1102:9530:15390 2:N:0:ACCTGGAT+TTCTAGAC	0.6	-2.55814	-5.88947	0.205544	0.786005	1	0.6	-2.4227	-5.36173	0.234523	0.76967	1	0	0.135438	1.09843	0.958321	0.993871	1	0.6	-2.16457	-4.48332	0.264827	0.739844	1	0	0.393568	1.31364	0.875709	0.963978	1	0	0.25813	1.19593	0.918737	0.993629	1
o__Clostridiales, M70574:46:000000000-J6F43:1:1104:15406:13325 1:N:0:TGAATCCG+CCGATCTT/M70574:46:000000000-J6F43:1:1104:15406:13325 2:N:0:TGAATCCG+CCGATCTT	0.6	2.84077	7.16404	0.223401	0.786005	1	0	0.437042	1.35383	0.878268	0.946826	1	0.6	-2.40373	-5.2917	0.245541	0.993871	1	0	0.697818	1.62205	0.802121	0.90078	1	0.6	-2.14296	-4.41666	0.277652	0.918974	1	0	0.260776	1.19812	0.919115	0.993629	1
o__Clostridiales, M70574:46:000000000-J6F43:1:1104:16459:15990 1:N:0:TGAATCCG+TTCTAGAC/M70574:46:000000000-J6F43:1:1104:16459:15990 2:N:0:TGAATCCG+TTCTAGAC	1	-3.24985	-9.51268	0.104736	0.786005	1	1	-3.1146	-8.66142	0.123203	0.76967	1	0	0.135248	1.09828	0.958865	0.993871	1	1	-2.85565	-7.23828	0.137525	0.739844	1	0	0.394204	1.31422	0.877035	0.963978	1	0	0.258956	1.19661	0.91947	0.993629	1
f__Ruminococcaceae, M70574:46:000000000-J6F43:1:1104:5392:19203 1:N:0:ACCTGGAT+CCGATCTT/M70574:46:000000000-J6F43:1:1104:5392:19203 2:N:0:ACCTGGAT+CCGATCTT	0.6	2.76623	6.80328	0.227028	0.786005	1	0	0.437282	1.35405	0.876459	0.946826	1	0.6	-2.32895	-5.02439	0.249398	0.993871	1	0	0.695451	1.61939	0.799888	0.90078	1	0.6	-2.07078	-4.20114	0.281888	0.918974	1	0	0.258169	1.19596	0.918538	0.993629	1
g__Lactobacillus, M70574:46:000000000-J6F43:1:1105:17362:10332 1:N:0:ACCTGGAT+TAACTCTG/M70574:46:000000000-J6F43:1:1105:17362:10332 2:N:0:ACCTGGAT+TAACTCTG	0.6	2.76257	6.78606	0.22945	0.786005	1	0	0.437214	1.35399	0.876781	0.946826	1	0.6	-2.32536	-5.01191	0.252452	0.993871	1	0	0.69611	1.62013	0.8002	0.90078	1	0.6	-2.06646	-4.18859	0.285431	0.918974	1	0	0.258896	1.19656	0.918549	0.993629	1
f__S24-7, M70574:46:000000000-J6F43:1:1105:19919:21693 1:N:0:ACCTGGAT+CCGATCTT/M70574:46:000000000-J6F43:1:1105:19919:21693 2:N:0:ACCTGGAT+CCGATCTT	0.6	2.76623	6.80328	0.226986	0.786005	1	0	0.437282	1.35405	0.876451	0.946826	1	0.6	-2.32895	-5.02439	0.249345	0.993871	1	0	0.695451	1.61939	0.799876	0.90078	1	0.6	-2.07078	-4.20114	0.281828	0.918974	1	0	0.258169	1.19596	0.918532	0.993629	1
o__Clostridiales, M70574:46:000000000-J6F43:1:1106:21044:11231 1:N:0:ACCTGGAT+CCACAGGT/M70574:46:000000000-J6F43:1:1106:21044:11231 2:N:0:ACCTGGAT+CCACAGGT	0.6	2.65895	6.31574	0.305013	0.786005	1	2	4.32672	20.0665	0.0849656	0.76967	1	2	1.66777	3.17723	0.291206	0.993871	1	2.4	4.75929	27.0826	0.0572199	0.705541	1	2.4	2.10034	4.28811	0.179771	0.918974	1	2.4	0.432573	1.34964	0.762043	0.993629	1
o__Clostridiales, M70574:46:000000000-J6F43:1:1106:25979:5233 1:N:0:ACCTGGAT+CACTAATG/M70574:46:000000000-J6F43:1:1106:25979:5233 2:N:0:ACCTGGAT+CACTAATG	0.4	-2.1199	-4.34663	0.321849	0.786005	1	0.6	0.456845	1.37254	0.746703	0.946826	1	0.6	2.57674	5.96591	0.216322	0.993871	1	0.4	-1.72444	-3.30452	0.403559	0.794631	1	0	0.395455	1.31536	0.877712	0.963978	1	0.6	-2.18129	-4.53558	0.277026	0.993629	1
o__YS2, M70574:46:000000000-J6F43:1:1106:8092:7714 1:N:0:ACCTGGAT+TAACTCTG/M70574:46:000000000-J6F43:1:1106:8092:7714 2:N:0:ACCTGGAT+TAACTCTG	2	4.11424	17.3185	0.106433	0.786005	1	1.2	3.53758	11.6123	0.170083	0.76967	1	2	-0.576661	-1.49139	0.711436	0.993871	1	1.4	4.0516	16.5826	0.113495	0.739844	1	2	-0.0626431	-1.04438	0.967297	0.99127	1	1.4	0.514018	1.42802	0.744568	0.993629	1
g__Allobaculum, M70574:46:000000000-J6F43:1:1107:19686:11900 1:N:0:ACCTGGAT+CCACAGGT/M70574:46:000000000-J6F43:1:1107:19686:11900 2:N:0:ACCTGGAT+CCACAGGT	1.6	4.16913	17.99	0.0770975	0.786005	1	2	4.54588	23.3586	0.0532399	0.76967	1	2	0.376754	1.29842	0.743489	0.993871	1	1.6	4.31918	19.9619	0.0674723	0.739844	1	1.6	0.150048	1.10961	0.898157	0.971539	1	2	-0.226707	-1.17016	0.844911	0.993629	1
g__Sutterella, M70574:46:000000000-J6F43:1:1107:7176:11122 1:N:0:ACCTGGAT+TAACTCTG/M70574:46:000000000-J6F43:1:1107:7176:11122 2:N:0:ACCTGGAT+TAACTCTG	0.6	2.76257	6.78606	0.229346	0.786005	1	0	0.437214	1.35399	0.876763	0.946826	1	0.6	-2.32536	-5.01191	0.25232	0.993871	1	0	0.69611	1.62013	0.800169	0.90078	1	0.6	-2.06646	-4.18859	0.285282	0.918974	1	0	0.258896	1.19656	0.918534	0.993629	1
f__Lachnospiraceae, M70574:46:000000000-J6F43:1:1108:24328:16833 1:N:0:GTGCCATA+CCGATCTT/M70574:46:000000000-J6F43:1:1108:24328:16833 2:N:0:GTGCCATA+CCGATCTT	1.4	1.49824	2.82498	0.297316	0.786005	1	1.2	1.43174	2.69772	0.324732	0.76967	1	1.4	-0.0665019	-1.04717	0.956728	0.993871	1	1.8	2.04292	4.12078	0.150302	0.739844	1	1.8	0.544678	1.45869	0.645911	0.963978	1	1.8	0.611179	1.52751	0.612076	0.993629	1
o__Nitrosomonadales, M70574:46:000000000-J6F43:1:1108:4300:12811 1:N:0:GTGCCATA+GTGTGTCA/M70574:46:000000000-J6F43:1:1108:4300:12811 2:N:0:GTGCCATA+GTGTGTCA	1	-3.3675	-10.3209	0.106703	0.786005	1	1	-3.23378	-9.40728	0.124421	0.76967	1	0	0.133722	1.09712	0.960384	0.993871	1	1	-2.96804	-7.82471	0.139518	0.739844	1	0	0.399462	1.31902	0.878718	0.963978	1	0	0.26574	1.20225	0.919564	0.993629	1
f__Ruminococcaceae, M70574:46:000000000-J6F43:1:1109:24046:15618 1:N:0:ACCTGGAT+CACTAATG/M70574:46:000000000-J6F43:1:1109:24046:15618 2:N:0:ACCTGGAT+CACTAATG	0.8	3.13724	8.79838	0.179613	0.786005	1	0.6	2.90211	7.4752	0.220392	0.76967	1	0.8	-0.235125	-1.17701	0.85448	0.993871	1	0	0.696484	1.62055	0.804082	0.90078	1	0.8	-2.44075	-5.42925	0.217564	0.918974	1	0.6	-2.20563	-4.61276	0.273732	0.993629	1
g__Ruminococcus, M70574:46:000000000-J6F43:1:1109:27192:13923 1:N:0:ACCTGGAT+CCACAGGT/M70574:46:000000000-J6F43:1:1109:27192:13923 2:N:0:ACCTGGAT+CCACAGGT	0.6	-2.46687	-5.52845	0.28119	0.786005	1	0.6	0.00806838	1.00561	0.996084	0.998007	1	0.6	2.47494	5.55945	0.278371	0.993871	1	1.4	1.29444	2.45282	0.397243	0.794631	1	1.4	3.76131	13.5603	0.0876173	0.918974	1	1.4	1.28637	2.43914	0.397437	0.993629	1
f__[Mogibacteriaceae], M70574:46:000000000-J6F43:1:1110:12523:22510 1:N:0:GTGCCATA+TTCTAGAC/M70574:46:000000000-J6F43:1:1110:12523:22510 2:N:0:GTGCCATA+TTCTAGAC	0.6	-2.55691	-5.88446	0.210174	0.786005	1	0.6	-2.42162	-5.35771	0.239213	0.76967	1	0	0.135294	1.09832	0.958606	0.993871	1	0.6	-2.16286	-4.47801	0.27021	0.739844	1	0	0.394051	1.31408	0.87631	0.963978	1	0	0.258757	1.19645	0.91903	0.993629	1
f__Ruminococcaceae, M70574:46:000000000-J6F43:1:1110:14789:14528 1:N:0:ACCTGGAT+CCGATCTT/M70574:46:000000000-J6F43:1:1110:14789:14528 2:N:0:ACCTGGAT+CCGATCTT	1.4	3.73547	13.3195	0.117679	0.786005	1	0	0.436746	1.35355	0.882001	0.946826	1	1.4	-3.29873	-9.84047	0.121186	0.993871	1	1	3.49569	11.28	0.147427	0.739844	1	1.4	-0.239781	-1.18081	0.853897	0.963978	1	1	3.05895	8.33363	0.156155	0.993629	1
f__S24-7, M70574:46:000000000-J6F43:1:1110:20583:16232 1:N:0:ACCTGGAT+TAACTCTG/M70574:46:000000000-J6F43:1:1110:20583:16232 2:N:0:ACCTGGAT+TAACTCTG	1	3.30911	9.91155	0.163057	0.786005	1	0	0.436723	1.35353	0.88079	0.946826	1	1	-2.87239	-7.32276	0.173912	0.993871	1	0.4	2.59858	6.05689	0.28893	0.749455	1	1	-0.710535	-1.63641	0.614171	0.963978	1	0.4	2.16185	4.47489	0.325716	0.993629	1
f__S24-7, M70574:46:000000000-J6F43:1:1110:27024:14918 1:N:0:ACCTGGAT+CCGATCTT/M70574:46:000000000-J6F43:1:1110:27024:14918 2:N:0:ACCTGGAT+CCGATCTT	0.6	2.76623	6.80328	0.227108	0.786005	1	0	0.437282	1.35405	0.876473	0.946826	1	0.6	-2.32895	-5.02439	0.249501	0.993871	1	0	0.695451	1.61939	0.799912	0.90078	1	0.6	-2.07078	-4.20114	0.282005	0.918974	1	0	0.258169	1.19596	0.918549	0.993629	1
f__S24-7, M70574:46:000000000-J6F43:1:1110:7190:5939 1:N:0:ACCTGGAT+AGGTCATT/M70574:46:000000000-J6F43:1:1110:7190:5939 2:N:0:ACCTGGAT+AGGTCATT	0.4	-2.11189	-4.32257	0.321125	0.786005	1	0.4	-1.97685	-3.93632	0.356728	0.76967	1	0	0.135043	1.09813	0.959118	0.993871	1	0.6	0.581135	1.49603	0.676471	0.90078	1	0.6	2.69303	6.46668	0.192956	0.918974	1	0.6	2.55798	5.88884	0.219969	0.993629	1
f__Ruminococcaceae, M70574:46:000000000-J6F43:1:1110:9027:17368 1:N:0:ACCTGGAT+CCACAGGT/M70574:46:000000000-J6F43:1:1110:9027:17368 2:N:0:ACCTGGAT+CCACAGGT	1.4	-4.50622	-22.7251	0.0435615	0.786005	1	1.4	-2.48261	-5.58908	0.12967	0.76967	1	0.4	2.02361	4.06599	0.396796	0.993871	1	1.4	-1.78039	-3.43519	0.24855	0.739844	1	0.6	2.72583	6.61539	0.240794	0.918974	1	0.6	0.702221	1.62701	0.689967	0.993629	1
f__S24-7, M70574:46:000000000-J6F43:1:1111:11006:15089 1:N:0:ACCTGGAT+CCGATCTT/M70574:46:000000000-J6F43:1:1111:11006:15089 2:N:0:ACCTGGAT+CCGATCTT	0.6	2.76623	6.80328	0.227231	0.786005	1	0	0.437282	1.35405	0.876494	0.946826	1	0.6	-2.32895	-5.02439	0.249658	0.993871	1	0	0.695451	1.61939	0.799949	0.90078	1	0.6	-2.07078	-4.20114	0.282182	0.918974	1	0	0.258169	1.19596	0.918567	0.993629	1
f__Coriobacteriaceae, M70574:46:000000000-J6F43:1:1111:14714:14154 1:N:0:ACCTGGAT+TAACTCTG/M70574:46:000000000-J6F43:1:1111:14714:14154 2:N:0:ACCTGGAT+TAACTCTG	0.6	2.74905	6.72273	0.241844	0.786005	1	0	0.437106	1.35389	0.878529	0.946826	1	0.6	-2.31194	-4.96551	0.268013	0.993871	1	0.4	2.59822	6.05539	0.27659	0.745217	1	0.6	-0.150828	-1.11021	0.912402	0.971539	1	0.4	2.16111	4.4726	0.310584	0.993629	1
g__Ruminococcus, M70574:46:000000000-J6F43:1:1111:16224:6911 1:N:0:GTGCCATA+TTCTAGAC/M70574:46:000000000-J6F43:1:1111:16224:6911 2:N:0:GTGCCATA+TTCTAGAC	0.6	-2.5389	-5.81146	0.223673	0.786005	1	0.6	-2.40398	-5.2926	0.253046	0.76967	1	0	0.134923	1.09803	0.959255	0.993871	1	0.6	-0.240151	-1.18112	0.863301	0.936028	1	0.4	2.29875	4.92031	0.278338	0.918974	1	0.4	2.16383	4.48102	0.311268	0.993629	1
o__Clostridiales, M70574:46:000000000-J6F43:1:1111:20609:23426 1:N:0:ACCTGGAT+CACTAATG/M70574:46:000000000-J6F43:1:1111:20609:23426 2:N:0:ACCTGGAT+CACTAATG	0.6	2.71275	6.55571	0.251447	0.786005	1	0.6	2.86786	7.29983	0.225508	0.76967	1	0.6	0.15511	1.11351	0.9077	0.993871	1	0	0.698251	1.62254	0.80325	0.90078	1	0.6	-2.0145	-4.04041	0.316556	0.918974	1	0.6	-2.16961	-4.49902	0.280953	0.993629	1
f__Coriobacteriaceae, M70574:46:000000000-J6F43:1:1112:12382:7748 1:N:0:ACCTGGAT+TAACTCTG/M70574:46:000000000-J6F43:1:1112:12382:7748 2:N:0:ACCTGGAT+TAACTCTG	0.6	2.76257	6.78606	0.229243	0.786005	1	0	0.437214	1.35399	0.876745	0.946826	1	0.6	-2.32536	-5.01191	0.252188	0.993871	1	0	0.69611	1.62013	0.800138	0.90078	1	0.6	-2.06646	-4.18859	0.285133	0.918974	1	0	0.258896	1.19656	0.91852	0.993629	1
g__Oscillospira, M70574:46:000000000-J6F43:1:1112:27450:11161 1:N:0:GTGCCATA+TTCTAGAC/M70574:46:000000000-J6F43:1:1112:27450:11161 2:N:0:GTGCCATA+TTCTAGAC	0.6	-2.55691	-5.88446	0.210459	0.786005	1	0.6	-2.42162	-5.35771	0.2395	0.76967	1	0	0.135294	1.09832	0.958622	0.993871	1	0.6	-2.16286	-4.47801	0.270535	0.739844	1	0	0.394051	1.31408	0.876359	0.963978	1	0	0.258757	1.19645	0.919062	0.993629	1
g__Dehalobacterium, M70574:46:000000000-J6F43:1:1113:23353:6506 1:N:0:ACCTGGAT+TAACTCTG/M70574:46:000000000-J6F43:1:1113:23353:6506 2:N:0:ACCTGGAT+TAACTCTG	1.4	3.77074	13.6492	0.118835	0.786005	1	0.8	3.14401	8.8398	0.201431	0.76967	1	1.4	-0.626727	-1.54406	0.650847	0.993871	1	0.4	2.59811	6.05492	0.301935	0.758131	1	1.4	-1.17263	-2.25422	0.428663	0.918974	1	0.8	-0.545904	-1.45994	0.724942	0.993629	1
f__Ruminococcaceae, M70574:46:000000000-J6F43:1:1114:22499:18012 1:N:0:GTGCCATA+CACTAATG/M70574:46:000000000-J6F43:1:1114:22499:18012 2:N:0:GTGCCATA+CACTAATG	1	3.36137	10.2771	0.163158	0.786005	1	0.8	3.36305	10.2891	0.164584	0.76967	1	1	0.00167898	1.00116	0.999005	0.999529	1	2.6	4.78307	27.5326	0.0431658	0.608286	1	2.6	1.4217	2.67901	0.253975	0.918974	1	2.6	1.42002	2.6759	0.261374	0.993629	1
o__Clostridiales, M70574:46:000000000-J6F43:1:1115:21078:7693 1:N:0:TGAATCCG+CCGATCTT/M70574:46:000000000-J6F43:1:1115:21078:7693 2:N:0:TGAATCCG+CCGATCTT	0.6	2.84077	7.16404	0.223233	0.786005	1	0	0.437042	1.35383	0.878239	0.946826	1	0.6	-2.40373	-5.2917	0.245327	0.993871	1	0	0.697818	1.62205	0.802071	0.90078	1	0.6	-2.14296	-4.41666	0.277411	0.918974	1	0	0.260776	1.19812	0.919091	0.993629	1
o__Clostridiales, M70574:46:000000000-J6F43:1:1115:23307:11523 1:N:0:GTGCCATA+TAACTCTG/M70574:46:000000000-J6F43:1:1115:23307:11523 2:N:0:GTGCCATA+TAACTCTG	1	3.5371	11.6084	0.124449	0.786005	1	0	0.437008	1.35379	0.878774	0.946826	1	1	-3.10009	-8.57473	0.127593	0.993871	1	0	0.698164	1.62244	0.802861	0.90078	1	1	-2.83894	-7.15492	0.142718	0.918974	1	0	0.261155	1.19844	0.919397	0.993629	1
o__Clostridiales, M70574:46:000000000-J6F43:1:1116:13853:19834 1:N:0:ACCTGGAT+TTCTAGAC/M70574:46:000000000-J6F43:1:1116:13853:19834 2:N:0:ACCTGGAT+TTCTAGAC	0.6	-2.55814	-5.88947	0.205761	0.786005	1	0.6	-2.4227	-5.36173	0.234742	0.76967	1	0	0.135438	1.09843	0.958333	0.993871	1	0.6	-2.16457	-4.48332	0.265076	0.739844	1	0	0.393568	1.31364	0.875747	0.963978	1	0	0.25813	1.19593	0.918761	0.993629	1
o__Clostridiales, M70574:46:000000000-J6F43:1:1116:8249:9410 1:N:0:TGAATCCG+CCGATCTT/M70574:46:000000000-J6F43:1:1116:8249:9410 2:N:0:TGAATCCG+CCGATCTT	1.2	3.64388	12.5002	0.11052	0.786005	1	0	0.437198	1.35397	0.878263	0.946826	1	1.2	-3.20668	-9.23223	0.111224	0.993871	1	0	0.696268	1.62031	0.802656	0.90078	1	1.2	-2.94761	-7.71469	0.123824	0.918974	1	0	0.25907	1.19671	0.919688	0.993629	1
g__Adlercreutzia, M70574:46:000000000-J6F43:1:1119:17620:24277 1:N:0:ACCTGGAT+TAACTCTG/M70574:46:000000000-J6F43:1:1119:17620:24277 2:N:0:ACCTGGAT+TAACTCTG	1.2	3.67251	12.7507	0.132602	0.786005	1	1	3.63477	12.4215	0.13814	0.76967	1	1.2	-0.0377335	-1.0265	0.978095	0.995377	1	1.4	4.36504	20.6067	0.0718919	0.739844	1	1.4	0.692537	1.61612	0.601803	0.963978	1	1.4	0.730271	1.65895	0.587002	0.993629	1
f__Ruminococcaceae, M70574:46:000000000-J6F43:1:2101:21273:15561 1:N:0:GTGCCATA+GTGTGTCA/M70574:46:000000000-J6F43:1:2101:21273:15561 2:N:0:GTGCCATA+GTGTGTCA	0.6	-2.63025	-6.19134	0.201019	0.786005	1	0.6	-2.49546	-5.63906	0.228927	0.76967	1	0	0.134796	1.09794	0.959047	0.993871	1	0.6	-2.23452	-4.70605	0.258665	0.739844	1	0	0.395734	1.31561	0.87667	0.963978	1	0	0.260938	1.19826	0.918932	0.993629	1
o__Clostridiales, M70574:46:000000000-J6F43:1:2102:11087:22834 1:N:0:ACCTGGAT+TTCTAGAC/M70574:46:000000000-J6F43:1:2102:11087:22834 2:N:0:ACCTGGAT+TTCTAGAC	1	-3.09425	-8.54008	0.13284	0.786005	1	1	-2.95986	-7.78048	0.153923	0.76967	1	0	0.134391	1.09763	0.95965	0.993871	1	1	-2.69712	-6.48508	0.173051	0.739844	1	0	0.397125	1.31688	0.877752	0.963978	1	0	0.262734	1.19975	0.91937	0.993629	1
f__S24-7, M70574:46:000000000-J6F43:1:2104:8461:15416 1:N:0:ACCTGGAT+CCGATCTT/M70574:46:000000000-J6F43:1:2104:8461:15416 2:N:0:ACCTGGAT+CCGATCTT	0.6	2.76623	6.80328	0.227354	0.786005	1	0	0.437282	1.35405	0.876516	0.946826	1	0.6	-2.32895	-5.02439	0.249814	0.993871	1	0	0.695451	1.61939	0.799985	0.90078	1	0.6	-2.07078	-4.20114	0.28236	0.918974	1	0	0.258169	1.19596	0.918584	0.993629	1
f__Ruminococcaceae, M70574:46:000000000-J6F43:1:2105:10390:21205 1:N:0:ACCTGGAT+TTCTAGAC/M70574:46:000000000-J6F43:1:2105:10390:21205 2:N:0:ACCTGGAT+TTCTAGAC	0.6	-2.55814	-5.88947	0.205978	0.786005	1	0.6	-2.4227	-5.36173	0.234962	0.76967	1	0	0.135438	1.09843	0.958345	0.993871	1	0.6	-2.16457	-4.48332	0.265325	0.739844	1	0	0.393568	1.31364	0.875785	0.963978	1	0	0.25813	1.19593	0.918786	0.993629	1
M70574:46:000000000-J6F43:1:2106:23378:14240 1:N:0:GTGCCATA+TTCTAGAC/M70574:46:000000000-J6F43:1:2106:23378:14240 2:N:0:GTGCCATA+TTCTAGAC	0.6	-2.55691	-5.88446	0.210466	0.786005	1	0.6	-2.42162	-5.35771	0.239508	0.76967	1	0	0.135294	1.09832	0.958622	0.993871	1	0.6	-2.16286	-4.47801	0.270544	0.739844	1	0	0.394051	1.31408	0.876361	0.963978	1	0	0.258757	1.19645	0.919063	0.993629	1
o__Clostridiales, M70574:46:000000000-J6F43:1:2108:15422:19638 1:N:0:ACCTGGAT+CCGATCTT/M70574:46:000000000-J6F43:1:2108:15422:19638 2:N:0:ACCTGGAT+CCGATCTT	0.6	2.76623	6.80328	0.227566	0.786005	1	0	0.437282	1.35405	0.876553	0.946826	1	0.6	-2.32895	-5.02439	0.250084	0.993871	1	0	0.695451	1.61939	0.800048	0.90078	1	0.6	-2.07078	-4.20114	0.282666	0.918974	1	0	0.258169	1.19596	0.918614	0.993629	1
o__Clostridiales, M70574:46:000000000-J6F43:1:2108:5587:6418 1:N:0:TGAATCCG+TTCTAGAC/M70574:46:000000000-J6F43:1:2108:5587:6418 2:N:0:TGAATCCG+TTCTAGAC	0.6	-2.57889	-5.97479	0.208329	0.786005	1	0.6	-2.44381	-5.44077	0.237031	0.76967	1	0	0.135076	1.09815	0.958812	0.993871	1	0.6	-2.1841	-4.54444	0.267801	0.739844	1	0	0.394786	1.31475	0.876507	0.963978	1	0	0.25971	1.19724	0.919012	0.993629	1
g__Bifidobacterium, M70574:46:000000000-J6F43:1:2110:19044:15136 1:N:0:ACCTGGAT+TAACTCTG/M70574:46:000000000-J6F43:1:2110:19044:15136 2:N:0:ACCTGGAT+TAACTCTG	0.6	2.76257	6.78606	0.229139	0.786005	1	0	0.437214	1.35399	0.876726	0.946826	1	0.6	-2.32536	-5.01191	0.252056	0.993871	1	0	0.69611	1.62013	0.800107	0.90078	1	0.6	-2.06646	-4.18859	0.284984	0.918974	1	0	0.258896	1.19656	0.918505	0.993629	1
f__Erysipelotrichaceae, M70574:46:000000000-J6F43:1:2110:4447:15904 1:N:0:ACCTGGAT+TAACTCTG/M70574:46:000000000-J6F43:1:2110:4447:15904 2:N:0:ACCTGGAT+TAACTCTG	0.6	2.76257	6.78606	0.229036	0.786005	1	0	0.437214	1.35399	0.876708	0.946826	1	0.6	-2.32536	-5.01191	0.251925	0.993871	1	0	0.69611	1.62013	0.800076	0.90078	1	0.6	-2.06646	-4.18859	0.284835	0.918974	1	0	0.258896	1.19656	0.91849	0.993629	1
o__Clostridiales, M70574:46:000000000-J6F43:1:2111:24079:6305 1:N:0:GTGCCATA+GTGTGTCA/M70574:46:000000000-J6F43:1:2111:24079:6305 2:N:0:GTGCCATA+GTGTGTCA	0.6	-2.63025	-6.19134	0.201113	0.786005	1	0.6	-2.49546	-5.63906	0.229023	0.76967	1	0	0.134796	1.09794	0.959052	0.993871	1	0.6	-2.23452	-4.70605	0.258773	0.739844	1	0	0.395734	1.31561	0.876686	0.963978	1	0	0.260938	1.19826	0.918943	0.993629	1
f__Lachnospiraceae, M70574:46:000000000-J6F43:1:2112:16064:9195 1:N:0:ACCTGGAT+CCGATCTT/M70574:46:000000000-J6F43:1:2112:16064:9195 2:N:0:ACCTGGAT+CCGATCTT	0.6	2.74651	6.71092	0.240336	0.786005	1	0.4	2.46651	5.52706	0.300829	0.76967	1	0.6	-0.28	-1.21419	0.837406	0.993871	1	0	0.696369	1.62042	0.802452	0.90078	1	0.6	-2.05014	-4.14147	0.300861	0.918974	1	0.4	-1.77014	-3.41088	0.3842	0.993629	1
g__Clostridium, M70574:46:000000000-J6F43:1:2112:9087:23751 1:N:0:GTGCCATA+TAACTCTG/M70574:46:000000000-J6F43:1:2112:9087:23751 2:N:0:GTGCCATA+TAACTCTG	0.6	2.8906	7.41576	0.214148	0.786005	1	0	0.436957	1.35375	0.878208	0.946826	1	0.6	-2.45364	-5.47796	0.234304	0.993871	1	0	0.698682	1.62302	0.801717	0.90078	1	0.6	-2.19191	-4.56911	0.264939	0.918974	1	0	0.261725	1.19891	0.918745	0.993629	1
g__Lactobacillus, M70574:46:000000000-J6F43:1:2113:11309:9362 1:N:0:TGAATCCG+CCGATCTT/M70574:46:000000000-J6F43:1:2113:11309:9362 2:N:0:TGAATCCG+CCGATCTT	0.6	2.84077	7.16404	0.222874	0.786005	1	0	0.437042	1.35383	0.878175	0.946826	1	0.6	-2.40373	-5.2917	0.244873	0.993871	1	0	0.697818	1.62205	0.801964	0.90078	1	0.6	-2.14296	-4.41666	0.276898	0.918974	1	0	0.260776	1.19812	0.91904	0.993629	1
f__Clostridiaceae, M70574:46:000000000-J6F43:1:2113:7700:19770 1:N:0:ACCTGGAT+TTCTAGAC/M70574:46:000000000-J6F43:1:2113:7700:19770 2:N:0:ACCTGGAT+TTCTAGAC	0.6	-2.55814	-5.88947	0.206196	0.786005	1	0.6	-2.4227	-5.36173	0.235183	0.76967	1	0	0.135438	1.09843	0.958357	0.993871	1	0.6	-2.16457	-4.48332	0.265576	0.739844	1	0	0.393568	1.31364	0.875823	0.963978	1	0	0.25813	1.19593	0.91881	0.993629	1
f__S24-7, M70574:46:000000000-J6F43:1:2116:10530:7691 1:N:0:TGAATCCG+CCGATCTT/M70574:46:000000000-J6F43:1:2116:10530:7691 2:N:0:TGAATCCG+CCGATCTT	0.6	2.84077	7.16404	0.22251	0.786005	1	0	0.437042	1.35383	0.878112	0.946826	1	0.6	-2.40373	-5.2917	0.244413	0.993871	1	0	0.697818	1.62205	0.801855	0.90078	1	0.6	-2.14296	-4.41666	0.276378	0.918974	1	0	0.260776	1.19812	0.918988	0.993629	1
o__Clostridiales, M70574:46:000000000-J6F43:1:2119:13773:10773 1:N:0:ACCTGGAT+CCGATCTT/M70574:46:000000000-J6F43:1:2119:13773:10773 2:N:0:ACCTGGAT+CCGATCTT	1	3.40766	10.6122	0.145848	0.786005	1	0	0.437077	1.35386	0.87991	0.946826	1	1	-2.97058	-7.83852	0.153191	0.993871	1	0.4	2.67395	6.38173	0.269044	0.739844	1	1	-0.733711	-1.66291	0.5854	0.963978	1	0.4	2.23687	4.71373	0.301562	0.993629	1
o__Clostridiales, M70574:46:000000000-J6F43:1:1101:22736:14336 1:N:0:ACCTGGAT+TTCTAGAC/M70574:46:000000000-J6F43:1:1101:22736:14336 2:N:0:ACCTGGAT+TTCTAGAC	0.4	-2.08226	-4.2347	0.298878	0.786005	1	0.4	-1.94668	-3.85487	0.335631	0.76967	1	0	0.135578	1.09853	0.957326	0.993871	1	0.4	-1.68916	-3.22468	0.379934	0.794631	1	0	0.393102	1.31321	0.872847	0.963978	1	0	0.257525	1.19543	0.916978	0.993629	1
s__gnavus, M70574:46:000000000-J6F43:1:1101:5420:12709 1:N:0:ACCTGGAT+CACTAATG/M70574:46:000000000-J6F43:1:1101:5420:12709 2:N:0:ACCTGGAT+CACTAATG	1.6	3.99566	15.9519	0.0866483	0.786005	1	0.4	2.41612	5.33735	0.324756	0.76967	1	1.6	-1.57953	-2.98873	0.245471	0.993871	1	0	0.698984	1.62336	0.805466	0.90078	1	1.6	-3.29667	-9.82648	0.0944031	0.918974	1	0.4	-1.71714	-3.28784	0.416492	0.993629	1
g__Ruminococcus, M70574:46:000000000-J6F43:1:1102:24728:9133 1:N:0:GTGCCATA+TTCTAGAC/M70574:46:000000000-J6F43:1:1102:24728:9133 2:N:0:GTGCCATA+TTCTAGAC	0.4	-2.08233	-4.23491	0.298858	0.786005	1	0.4	-1.94675	-3.85506	0.335611	0.76967	1	0	0.135578	1.09853	0.957326	0.993871	1	0.4	-1.68923	-3.22484	0.379911	0.794631	1	0	0.393102	1.31321	0.872847	0.963978	1	0	0.257525	1.19543	0.916978	0.993629	1
g__Megasphaera, M70574:46:000000000-J6F43:1:1102:27650:20460 1:N:0:ACCTGGAT+TAACTCTG/M70574:46:000000000-J6F43:1:1102:27650:20460 2:N:0:ACCTGGAT+TAACTCTG	0.4	2.31936	4.9911	0.308111	0.786005	1	0	0.437342	1.35411	0.874267	0.946826	1	0.4	-1.88201	-3.68589	0.348504	0.993871	1	0	0.694867	1.61874	0.796381	0.90078	1	0.4	-1.62449	-3.08333	0.394729	0.918974	1	0	0.257525	1.19543	0.916978	0.993629	1
o__Clostridiales, M70574:46:000000000-J6F43:1:1103:18081:16156 1:N:0:GTGCCATA+CCGATCTT/M70574:46:000000000-J6F43:1:1103:18081:16156 2:N:0:GTGCCATA+CCGATCTT	0.4	2.31951	4.99162	0.308075	0.786005	1	0	0.437342	1.35411	0.874267	0.946826	1	0.4	-1.88217	-3.68628	0.34846	0.993871	1	0	0.694867	1.61874	0.796381	0.90078	1	0.4	-1.62464	-3.08366	0.39468	0.918974	1	0	0.257525	1.19543	0.916978	0.993629	1
f__Ruminococcaceae, M70574:46:000000000-J6F43:1:1104:16836:18245 1:N:0:TGAATCCG+TTCTAGAC/M70574:46:000000000-J6F43:1:1104:16836:18245 2:N:0:TGAATCCG+TTCTAGAC	0.4	-2.08245	-4.23525	0.298827	0.786005	1	0.4	-1.94687	-3.85537	0.335578	0.76967	1	0	0.135578	1.09853	0.957326	0.993871	1	0.4	-1.68934	-3.2251	0.379874	0.794631	1	0	0.393102	1.31321	0.872847	0.963978	1	0	0.257525	1.19543	0.916978	0.993629	1
f__Ruminococcaceae, M70574:46:000000000-J6F43:1:1104:7413:20315 1:N:0:GTGCCATA+TTCTAGAC/M70574:46:000000000-J6F43:1:1104:7413:20315 2:N:0:GTGCCATA+TTCTAGAC	0.4	-2.08233	-4.23491	0.312099	0.786005	1	0.4	0.0945859	1.06776	0.944667	0.97244	1	0.4	2.17692	4.52186	0.287276	0.993871	1	0.4	-1.68923	-3.22484	0.394085	0.794631	1	0	0.393102	1.31321	0.875121	0.963978	1	0.4	-1.78381	-3.44335	0.364545	0.993629	1
o__RF39, M70574:46:000000000-J6F43:1:1105:25729:15005 1:N:0:ACCTGGAT+CCACAGGT/M70574:46:000000000-J6F43:1:1105:25729:15005 2:N:0:ACCTGGAT+CCACAGGT	0.4	-2.16229	-4.47626	0.307846	0.786005	1	0.4	-2.02722	-4.07619	0.342772	0.76967	1	0	0.135073	1.09815	0.95909	0.993871	1	0.4	0.136579	1.09929	0.924692	0.958343	1	0.4	2.29887	4.92073	0.276122	0.918974	1	0.4	2.1638	4.48094	0.30909	0.993629	1
o__Clostridiales, M70574:46:000000000-J6F43:1:1105:28430:12331 1:N:0:ACCTGGAT+GTGTGTCA/M70574:46:000000000-J6F43:1:1105:28430:12331 2:N:0:ACCTGGAT+GTGTGTCA	0.4	-2.08278	-4.23623	0.311787	0.786005	1	0.4	-1.9472	-3.85626	0.348259	0.76967	1	0	0.135578	1.09853	0.958032	0.993871	1	0.4	-1.68968	-3.22585	0.393739	0.794631	1	0	0.393102	1.31321	0.875088	0.963978	1	0	0.257525	1.19543	0.918428	0.993629	1
g__Coprococcus, M70574:46:000000000-J6F43:1:1105:8715:10962 1:N:0:GTGCCATA+CCGATCTT/M70574:46:000000000-J6F43:1:1105:8715:10962 2:N:0:GTGCCATA+CCGATCTT	0.4	2.31951	4.99162	0.308075	0.786005	1	0	0.437342	1.35411	0.874267	0.946826	1	0.4	-1.88217	-3.68628	0.34846	0.993871	1	0	0.694867	1.61874	0.796381	0.90078	1	0.4	-1.62464	-3.08366	0.39468	0.918974	1	0	0.257525	1.19543	0.916978	0.993629	1
o__Clostridiales, M70574:46:000000000-J6F43:1:1106:16670:12636 1:N:0:GTGCCATA+GTGTGTCA/M70574:46:000000000-J6F43:1:1106:16670:12636 2:N:0:GTGCCATA+GTGTGTCA	0.4	-2.08256	-4.23557	0.298798	0.786005	1	0.4	-1.94698	-3.85566	0.335547	0.76967	1	0	0.135578	1.09853	0.957326	0.993871	1	0.4	-1.68945	-3.22534	0.379839	0.794631	1	0	0.393102	1.31321	0.872847	0.963978	1	0	0.257525	1.19543	0.916978	0.993629	1
M70574:46:000000000-J6F43:1:1106:18988:7345 1:N:0:ACCTGGAT+TTCTAGAC/M70574:46:000000000-J6F43:1:1106:18988:7345 2:N:0:ACCTGGAT+TTCTAGAC	0.4	-2.08226	-4.2347	0.298878	0.786005	1	0.4	-1.94668	-3.85487	0.335631	0.76967	1	0	0.135578	1.09853	0.957326	0.993871	1	0.4	-1.68916	-3.22468	0.379934	0.794631	1	0	0.393102	1.31321	0.872847	0.963978	1	0	0.257525	1.19543	0.916978	0.993629	1
o__Clostridiales, M70574:46:000000000-J6F43:1:1106:7201:6145 1:N:0:ACCTGGAT+TTCTAGAC/M70574:46:000000000-J6F43:1:1106:7201:6145 2:N:0:ACCTGGAT+TTCTAGAC	0.4	-2.08226	-4.2347	0.298878	0.786005	1	0.4	-1.94668	-3.85487	0.335631	0.76967	1	0	0.135578	1.09853	0.957326	0.993871	1	0.4	-1.68916	-3.22468	0.379934	0.794631	1	0	0.393102	1.31321	0.872847	0.963978	1	0	0.257525	1.19543	0.916978	0.993629	1
o__Clostridiales, M70574:46:000000000-J6F43:1:1107:10219:13864 1:N:0:GTGCCATA+CCGATCTT/M70574:46:000000000-J6F43:1:1107:10219:13864 2:N:0:GTGCCATA+CCGATCTT	0.4	2.31951	4.99162	0.308075	0.786005	1	0	0.437342	1.35411	0.874267	0.946826	1	0.4	-1.88217	-3.68628	0.34846	0.993871	1	0	0.694867	1.61874	0.796381	0.90078	1	0.4	-1.62464	-3.08366	0.39468	0.918974	1	0	0.257525	1.19543	0.916978	0.993629	1
f__S24-7, M70574:46:000000000-J6F43:1:1107:10660:7332 1:N:0:GTGCCATA+CCGATCTT/M70574:46:000000000-J6F43:1:1107:10660:7332 2:N:0:GTGCCATA+CCGATCTT	0.4	2.31951	4.99162	0.308075	0.786005	1	0	0.437342	1.35411	0.874267	0.946826	1	0.4	-1.88217	-3.68628	0.34846	0.993871	1	0	0.694867	1.61874	0.796381	0.90078	1	0.4	-1.62464	-3.08366	0.39468	0.918974	1	0	0.257525	1.19543	0.916978	0.993629	1
f__S24-7, M70574:46:000000000-J6F43:1:1107:6626:20988 1:N:0:ACCTGGAT+TAACTCTG/M70574:46:000000000-J6F43:1:1107:6626:20988 2:N:0:ACCTGGAT+TAACTCTG	0.4	2.31936	4.9911	0.308111	0.786005	1	0	0.437342	1.35411	0.874267	0.946826	1	0.4	-1.88201	-3.68589	0.348504	0.993871	1	0	0.694867	1.61874	0.796381	0.90078	1	0.4	-1.62449	-3.08333	0.394729	0.918974	1	0	0.257525	1.19543	0.916978	0.993629	1
f__Ruminococcaceae, M70574:46:000000000-J6F43:1:1108:28118:12888 1:N:0:GTGCCATA+GTGTGTCA/M70574:46:000000000-J6F43:1:1108:28118:12888 2:N:0:GTGCCATA+GTGTGTCA	0.4	-2.08256	-4.23557	0.298798	0.786005	1	0.4	-1.94698	-3.85566	0.335547	0.76967	1	0	0.135578	1.09853	0.957326	0.993871	1	0.4	-1.68945	-3.22534	0.379839	0.794631	1	0	0.393102	1.31321	0.872847	0.963978	1	0	0.257525	1.19543	0.916978	0.993629	1
f__S24-7, M70574:46:000000000-J6F43:1:1108:3575:17538 1:N:0:GTGCCATA+AGGTCATT/M70574:46:000000000-J6F43:1:1108:3575:17538 2:N:0:GTGCCATA+AGGTCATT	0.4	2.31951	4.99162	0.323956	0.786005	1	0	0.437342	1.35411	0.877042	0.946826	1	0.4	-1.88217	-3.68628	0.368088	0.993871	1	0.4	2.5999	6.06243	0.268095	0.739844	1	0.4	0.280388	1.21452	0.838567	0.963978	1	0.4	2.16255	4.47707	0.300038	0.993629	1
f__Christensenellaceae, M70574:46:000000000-J6F43:1:1108:5101:18029 1:N:0:GTGCCATA+TTCTAGAC/M70574:46:000000000-J6F43:1:1108:5101:18029 2:N:0:GTGCCATA+TTCTAGAC	0.4	-2.08233	-4.23491	0.298858	0.786005	1	0.4	-1.94675	-3.85506	0.335611	0.76967	1	0	0.135578	1.09853	0.957326	0.993871	1	0.4	-1.68923	-3.22484	0.379911	0.794631	1	0	0.393102	1.31321	0.872847	0.963978	1	0	0.257525	1.19543	0.916978	0.993629	1
f__S24-7, M70574:46:000000000-J6F43:1:1109:21833:9922 1:N:0:GTGCCATA+CCGATCTT/M70574:46:000000000-J6F43:1:1109:21833:9922 2:N:0:GTGCCATA+CCGATCTT	0.4	2.31951	4.99162	0.308075	0.786005	1	0	0.437342	1.35411	0.874267	0.946826	1	0.4	-1.88217	-3.68628	0.34846	0.993871	1	0	0.694867	1.61874	0.796381	0.90078	1	0.4	-1.62464	-3.08366	0.39468	0.918974	1	0	0.257525	1.19543	0.916978	0.993629	1
o__Clostridiales, M70574:46:000000000-J6F43:1:1109:22202:6153 1:N:0:GTGCCATA+CCGATCTT/M70574:46:000000000-J6F43:1:1109:22202:6153 2:N:0:GTGCCATA+CCGATCTT	0.4	2.31951	4.99162	0.308075	0.786005	1	0	0.437342	1.35411	0.874267	0.946826	1	0.4	-1.88217	-3.68628	0.34846	0.993871	1	0	0.694867	1.61874	0.796381	0.90078	1	0.4	-1.62464	-3.08366	0.39468	0.918974	1	0	0.257525	1.19543	0.916978	0.993629	1
M70574:46:000000000-J6F43:1:1109:8456:16762 1:N:0:GTGCCATA+TTCTAGAC/M70574:46:000000000-J6F43:1:1109:8456:16762 2:N:0:GTGCCATA+TTCTAGAC	0.4	-2.08233	-4.23491	0.298858	0.786005	1	0.4	-1.94675	-3.85506	0.335611	0.76967	1	0	0.135578	1.09853	0.957326	0.993871	1	0.4	-1.68923	-3.22484	0.379911	0.794631	1	0	0.393102	1.31321	0.872847	0.963978	1	0	0.257525	1.19543	0.916978	0.993629	1
o__Clostridiales, M70574:46:000000000-J6F43:1:1110:24065:6814 1:N:0:GTGCCATA+CCGATCTT/M70574:46:000000000-J6F43:1:1110:24065:6814 2:N:0:GTGCCATA+CCGATCTT	0.4	2.31951	4.99162	0.308075	0.786005	1	0	0.437342	1.35411	0.874267	0.946826	1	0.4	-1.88217	-3.68628	0.34846	0.993871	1	0	0.694867	1.61874	0.796381	0.90078	1	0.4	-1.62464	-3.08366	0.39468	0.918974	1	0	0.257525	1.19543	0.916978	0.993629	1
f__Ruminococcaceae, M70574:46:000000000-J6F43:1:1110:9957:15672 1:N:0:GTGCCATA+TAACTCTG/M70574:46:000000000-J6F43:1:1110:9957:15672 2:N:0:GTGCCATA+TAACTCTG	0.4	2.31965	4.99213	0.308711	0.786005	1	0	0.437342	1.35411	0.874384	0.946826	1	0.4	-1.88231	-3.68665	0.349255	0.993871	1	0	0.694867	1.61874	0.796579	0.90078	1	0.4	-1.62479	-3.08397	0.39555	0.918974	1	0	0.257525	1.19543	0.917073	0.993629	1
g__Oscillospira, M70574:46:000000000-J6F43:1:1111:20350:17804 1:N:0:ACCTGGAT+CCGATCTT/M70574:46:000000000-J6F43:1:1111:20350:17804 2:N:0:ACCTGGAT+CCGATCTT	0.4	2.3193	4.99089	0.308125	0.786005	1	0	0.437342	1.35411	0.874267	0.946826	1	0.4	-1.88196	-3.68574	0.348521	0.993871	1	0	0.694867	1.61874	0.796381	0.90078	1	0.4	-1.62443	-3.0832	0.394749	0.918974	1	0	0.257525	1.19543	0.916978	0.993629	1
g__Allobaculum, M70574:46:000000000-J6F43:1:1111:23659:14224 1:N:0:ACCTGGAT+CCGATCTT/M70574:46:000000000-J6F43:1:1111:23659:14224 2:N:0:ACCTGGAT+CCGATCTT	0.4	2.3193	4.99089	0.308125	0.786005	1	0	0.437342	1.35411	0.874267	0.946826	1	0.4	-1.88196	-3.68574	0.348521	0.993871	1	0	0.694867	1.61874	0.796381	0.90078	1	0.4	-1.62443	-3.0832	0.394749	0.918974	1	0	0.257525	1.19543	0.916978	0.993629	1
o__Clostridiales, M70574:46:000000000-J6F43:1:1111:27358:19358 1:N:0:ACCTGGAT+TTCTAGAC/M70574:46:000000000-J6F43:1:1111:27358:19358 2:N:0:ACCTGGAT+TTCTAGAC	0.4	-2.08226	-4.2347	0.298878	0.786005	1	0.4	-1.94668	-3.85487	0.335631	0.76967	1	0	0.135578	1.09853	0.957326	0.993871	1	0.4	-1.68916	-3.22468	0.379934	0.794631	1	0	0.393102	1.31321	0.872847	0.963978	1	0	0.257525	1.19543	0.916978	0.993629	1
f__S24-7, M70574:46:000000000-J6F43:1:1112:5323:19174 1:N:0:ACCTGGAT+CCGATCTT/M70574:46:000000000-J6F43:1:1112:5323:19174 2:N:0:ACCTGGAT+CCGATCTT	0.4	2.3193	4.99089	0.308125	0.786005	1	0	0.437342	1.35411	0.874267	0.946826	1	0.4	-1.88196	-3.68574	0.348521	0.993871	1	0	0.694867	1.61874	0.796381	0.90078	1	0.4	-1.62443	-3.0832	0.394749	0.918974	1	0	0.257525	1.19543	0.916978	0.993629	1
f__Coriobacteriaceae, M70574:46:000000000-J6F43:1:1112:5940:3872 1:N:0:GTGCCATA+TAACTCTG/M70574:46:000000000-J6F43:1:1112:5940:3872 2:N:0:GTGCCATA+TAACTCTG	0.8	3.12937	8.7505	0.163981	0.786005	1	0	0.437342	1.35411	0.875976	0.946826	1	0.8	-2.69202	-6.46219	0.172923	0.993871	1	0	0.694867	1.61874	0.79928	0.90078	1	0.8	-2.4345	-5.40576	0.194241	0.918974	1	0	0.257525	1.19543	0.91837	0.993629	1
o__Clostridiales, M70574:46:000000000-J6F43:1:1112:6345:18765 1:N:0:GTGCCATA+CCGATCTT/M70574:46:000000000-J6F43:1:1112:6345:18765 2:N:0:GTGCCATA+CCGATCTT	0.4	2.31951	4.99162	0.308075	0.786005	1	0	0.437342	1.35411	0.874267	0.946826	1	0.4	-1.88217	-3.68628	0.34846	0.993871	1	0	0.694867	1.61874	0.796381	0.90078	1	0.4	-1.62464	-3.08366	0.39468	0.918974	1	0	0.257525	1.19543	0.916978	0.993629	1
g__Adlercreutzia, M70574:46:000000000-J6F43:1:1115:26747:12102 1:N:0:ACCTGGAT+TAACTCTG/M70574:46:000000000-J6F43:1:1115:26747:12102 2:N:0:ACCTGGAT+TAACTCTG	0.4	2.31936	4.9911	0.308111	0.786005	1	0	0.437342	1.35411	0.874267	0.946826	1	0.4	-1.88201	-3.68589	0.348504	0.993871	1	0	0.694867	1.61874	0.796381	0.90078	1	0.4	-1.62449	-3.08333	0.394729	0.918974	1	0	0.257525	1.19543	0.916978	0.993629	1
o__Clostridiales, M70574:46:000000000-J6F43:1:1115:7886:8945 1:N:0:TGAATCCG+TAAGATCC/M70574:46:000000000-J6F43:1:1115:7886:8945 2:N:0:TGAATCCG+TAAGATCC	0.4	2.31936	4.9911	0.323247	0.786005	1	0.4	2.47896	5.57494	0.291214	0.76967	1	0.4	0.159599	1.11698	0.907816	0.993871	1	0	0.694867	1.61874	0.800865	0.90078	1	0.4	-1.62449	-3.08333	0.415069	0.918974	1	0.4	-1.78409	-3.44401	0.370945	0.993629	1
o__Clostridiales, M70574:46:000000000-J6F43:1:2102:26919:6005 1:N:0:TGAATCCG+CCGATCTT/M70574:46:000000000-J6F43:1:2102:26919:6005 2:N:0:TGAATCCG+CCGATCTT	0.4	2.3196	4.99192	0.308055	0.786005	1	0	0.437342	1.35411	0.874267	0.946826	1	0.4	-1.88225	-3.6865	0.348435	0.993871	1	0	0.694867	1.61874	0.796381	0.90078	1	0.4	-1.62473	-3.08384	0.394652	0.918974	1	0	0.257525	1.19543	0.916978	0.993629	1
f__[Mogibacteriaceae], M70574:46:000000000-J6F43:1:2103:15588:22440 1:N:0:ACCTGGAT+TAACTCTG/M70574:46:000000000-J6F43:1:2103:15588:22440 2:N:0:ACCTGGAT+TAACTCTG	0.4	2.31936	4.9911	0.320502	0.786005	1	0.4	2.47868	5.57388	0.288545	0.76967	1	0.4	0.159324	1.11676	0.906485	0.993871	1	0	0.694867	1.61874	0.800052	0.90078	1	0.4	-1.62449	-3.08333	0.411438	0.918974	1	0.4	-1.78381	-3.44335	0.367318	0.993629	1
o__Clostridiales, M70574:46:000000000-J6F43:1:2103:3373:7834 1:N:0:ACCTGGAT+TAACTCTG/M70574:46:000000000-J6F43:1:2103:3373:7834 2:N:0:ACCTGGAT+TAACTCTG	0.4	2.31936	4.9911	0.308111	0.786005	1	0	0.437342	1.35411	0.874267	0.946826	1	0.4	-1.88201	-3.68589	0.348504	0.993871	1	0	0.694867	1.61874	0.796381	0.90078	1	0.4	-1.62449	-3.08333	0.394729	0.918974	1	0	0.257525	1.19543	0.916978	0.993629	1
o__Clostridiales, M70574:46:000000000-J6F43:1:2105:26596:14457 1:N:0:ACCTGGAT+GTGTGTCA/M70574:46:000000000-J6F43:1:2105:26596:14457 2:N:0:ACCTGGAT+GTGTGTCA	0.8	-2.95018	-7.72844	0.143209	0.786005	1	0.8	-2.81467	-7.0356	0.166068	0.76967	1	0	0.135503	1.09848	0.958672	0.993871	1	0.8	-2.55683	-5.88412	0.186552	0.739844	1	0	0.393352	1.31344	0.876954	0.963978	1	0	0.257849	1.19569	0.919586	0.993629	1
g__Sutterella, M70574:46:000000000-J6F43:1:2106:22844:6815 1:N:0:GTGCCATA+TTCTAGAC/M70574:46:000000000-J6F43:1:2106:22844:6815 2:N:0:GTGCCATA+TTCTAGAC	0.4	-2.08233	-4.23491	0.298858	0.786005	1	0.4	-1.94675	-3.85506	0.335611	0.76967	1	0	0.135578	1.09853	0.957326	0.993871	1	0.4	-1.68923	-3.22484	0.379911	0.794631	1	0	0.393102	1.31321	0.872847	0.963978	1	0	0.257525	1.19543	0.916978	0.993629	1
o__Clostridiales, M70574:46:000000000-J6F43:1:2106:25338:18997 1:N:0:ACCTGGAT+CCGATCTT/M70574:46:000000000-J6F43:1:2106:25338:18997 2:N:0:ACCTGGAT+CCGATCTT	0.4	2.3193	4.99089	0.308125	0.786005	1	0	0.437342	1.35411	0.874267	0.946826	1	0.4	-1.88196	-3.68574	0.348521	0.993871	1	0	0.694867	1.61874	0.796381	0.90078	1	0.4	-1.62443	-3.0832	0.394749	0.918974	1	0	0.257525	1.19543	0.916978	0.993629	1
o__Clostridiales, M70574:46:000000000-J6F43:1:2107:15569:15291 1:N:0:ACCTGGAT+GTGTGTCA/M70574:46:000000000-J6F43:1:2107:15569:15291 2:N:0:ACCTGGAT+GTGTGTCA	0.4	-2.08278	-4.23623	0.311978	0.786005	1	0.4	-1.9472	-3.85626	0.348445	0.76967	1	0	0.135578	1.09853	0.958043	0.993871	1	0.4	-1.68968	-3.22585	0.393942	0.794631	1	0	0.393102	1.31321	0.875121	0.963978	1	0	0.257525	1.19543	0.918449	0.993629	1
g__Lactobacillus, M70574:46:000000000-J6F43:1:2107:22207:7417 1:N:0:GTGCCATA+AGGTCATT/M70574:46:000000000-J6F43:1:2107:22207:7417 2:N:0:GTGCCATA+AGGTCATT	1.2	3.64964	12.5502	0.121355	0.786005	1	1.2	3.82114	14.1344	0.104752	0.76967	1	1.2	0.171495	1.12623	0.886387	0.993871	1	2	4.5981	24.2195	0.0484651	0.637432	1	2	0.948457	1.92981	0.409475	0.918974	1	2	0.776962	1.71352	0.498873	0.993629	1
o__Clostridiales, M70574:46:000000000-J6F43:1:2108:18475:14800 1:N:0:GTGCCATA+CCGATCTT/M70574:46:000000000-J6F43:1:2108:18475:14800 2:N:0:GTGCCATA+CCGATCTT	0.4	2.31951	4.99162	0.308075	0.786005	1	0	0.437342	1.35411	0.874267	0.946826	1	0.4	-1.88217	-3.68628	0.34846	0.993871	1	0	0.694867	1.61874	0.796381	0.90078	1	0.4	-1.62464	-3.08366	0.39468	0.918974	1	0	0.257525	1.19543	0.916978	0.993629	1
M70574:46:000000000-J6F43:1:2108:22019:17870 1:N:0:ACCTGGAT+TAACTCTG/M70574:46:000000000-J6F43:1:2108:22019:17870 2:N:0:ACCTGGAT+TAACTCTG	0.4	2.31936	4.9911	0.308111	0.786005	1	0	0.437342	1.35411	0.874267	0.946826	1	0.4	-1.88201	-3.68589	0.348504	0.993871	1	0	0.694867	1.61874	0.796381	0.90078	1	0.4	-1.62449	-3.08333	0.394729	0.918974	1	0	0.257525	1.19543	0.916978	0.993629	1
g__Ruminococcus, M70574:46:000000000-J6F43:1:2108:24521:20762 1:N:0:TGAATCCG+CCGATCTT/M70574:46:000000000-J6F43:1:2108:24521:20762 2:N:0:TGAATCCG+CCGATCTT	0.4	2.3196	4.99192	0.308055	0.786005	1	0	0.437342	1.35411	0.874267	0.946826	1	0.4	-1.88225	-3.6865	0.348435	0.993871	1	0	0.694867	1.61874	0.796381	0.90078	1	0.4	-1.62473	-3.08384	0.394652	0.918974	1	0	0.257525	1.19543	0.916978	0.993629	1
f__Ruminococcaceae, M70574:46:000000000-J6F43:1:2108:9830:9961 1:N:0:ACCTGGAT+GTGTGTCA/M70574:46:000000000-J6F43:1:2108:9830:9961 2:N:0:ACCTGGAT+GTGTGTCA	0.4	-2.08278	-4.23623	0.312166	0.786005	1	0.4	-1.9472	-3.85626	0.348629	0.76967	1	0	0.135578	1.09853	0.958053	0.993871	1	0.4	-1.68968	-3.22585	0.394142	0.794631	1	0	0.393102	1.31321	0.875153	0.963978	1	0	0.257525	1.19543	0.91847	0.993629	1
o__Clostridiales, M70574:46:000000000-J6F43:1:2109:8950:17840 1:N:0:GTGCCATA+TTCTAGAC/M70574:46:000000000-J6F43:1:2109:8950:17840 2:N:0:GTGCCATA+TTCTAGAC	0.8	-2.93722	-7.65935	0.139125	0.786005	1	0.8	-2.80164	-6.97234	0.161952	0.76967	1	0	0.135578	1.09853	0.95828	0.993871	1	0.8	-2.54412	-5.83252	0.181732	0.739844	1	0	0.393102	1.31321	0.875872	0.963978	1	0	0.257525	1.19543	0.918936	0.993629	1
f__Lachnospiraceae, M70574:46:000000000-J6F43:1:2113:19632:14972 1:N:0:GTGCCATA+CCGATCTT/M70574:46:000000000-J6F43:1:2113:19632:14972 2:N:0:GTGCCATA+CCGATCTT	0.4	2.31951	4.99162	0.308075	0.786005	1	0	0.437342	1.35411	0.874267	0.946826	1	0.4	-1.88217	-3.68628	0.34846	0.993871	1	0	0.694867	1.61874	0.796381	0.90078	1	0.4	-1.62464	-3.08366	0.39468	0.918974	1	0	0.257525	1.19543	0.916978	0.993629	1
g__Oscillospira, M70574:46:000000000-J6F43:1:2114:10120:2502 1:N:0:ACCTGGAT+CCGATCTT/M70574:46:000000000-J6F43:1:2114:10120:2502 2:N:0:ACCTGGAT+CCGATCTT	0.4	2.3193	4.99089	0.308125	0.786005	1	0	0.437342	1.35411	0.874267	0.946826	1	0.4	-1.88196	-3.68574	0.348521	0.993871	1	0	0.694867	1.61874	0.796381	0.90078	1	0.4	-1.62443	-3.0832	0.394749	0.918974	1	0	0.257525	1.19543	0.916978	0.993629	1
o__RF39, M70574:46:000000000-J6F43:1:2115:22500:10531 1:N:0:ACCTGGAT+TAACTCTG/M70574:46:000000000-J6F43:1:2115:22500:10531 2:N:0:ACCTGGAT+TAACTCTG	0.4	2.31936	4.9911	0.308111	0.786005	1	0	0.437342	1.35411	0.874267	0.946826	1	0.4	-1.88201	-3.68589	0.348504	0.993871	1	0	0.694867	1.61874	0.796381	0.90078	1	0.4	-1.62449	-3.08333	0.394729	0.918974	1	0	0.257525	1.19543	0.916978	0.993629	1
g__Brachyspira, M70574:46:000000000-J6F43:1:2116:11116:17814 1:N:0:TGAATCCG+CCGATCTT/M70574:46:000000000-J6F43:1:2116:11116:17814 2:N:0:TGAATCCG+CCGATCTT	0.4	2.3196	4.99192	0.308055	0.786005	1	0	0.437342	1.35411	0.874267	0.946826	1	0.4	-1.88225	-3.6865	0.348435	0.993871	1	0	0.694867	1.61874	0.796381	0.90078	1	0.4	-1.62473	-3.08384	0.394652	0.918974	1	0	0.257525	1.19543	0.916978	0.993629	1
f__S24-7, M70574:46:000000000-J6F43:1:2118:12974:18556 1:N:0:ACCTGGAT+CCGATCTT/M70574:46:000000000-J6F43:1:2118:12974:18556 2:N:0:ACCTGGAT+CCGATCTT	0.8	3.12904	8.74852	0.159726	0.786005	1	0	0.437342	1.35411	0.875162	0.946826	1	0.8	-2.6917	-6.46073	0.167423	0.993871	1	0	0.694867	1.61874	0.797899	0.90078	1	0.8	-2.43417	-5.40454	0.18783	0.918974	1	0	0.257525	1.19543	0.917708	0.993629	1
o__Clostridiales, M70574:46:000000000-J6F43:1:2119:23722:14084 1:N:0:TGAATCCG+TTCTAGAC/M70574:46:000000000-J6F43:1:2119:23722:14084 2:N:0:TGAATCCG+TTCTAGAC	0.4	-2.08245	-4.23525	0.298827	0.786005	1	0.4	-1.94687	-3.85537	0.335578	0.76967	1	0	0.135578	1.09853	0.957326	0.993871	1	0.4	-1.68934	-3.2251	0.379874	0.794631	1	0	0.393102	1.31321	0.872847	0.963978	1	0	0.257525	1.19543	0.916978	0.993629	1
g__Dorea, 724472	0.4	2.33426	5.04293	0.33101	0.786548	1	0.4	2.52742	5.76538	0.291922	0.76967	1	0.4	0.193156	1.14326	0.894494	0.993871	1	0.4	2.59779	6.05359	0.278984	0.745217	1	0.4	0.26353	1.20041	0.856648	0.963978	1	0.4	0.0703747	1.04999	0.961387	0.997082	1
f__S24-7, 271325	0.4	-2.15931	-4.46702	0.331478	0.786548	1	0.6	0.625582	1.54283	0.678873	0.946826	1	0.6	2.78489	6.89187	0.196189	0.993871	1	0.6	0.454193	1.37002	0.76876	0.90078	1	0.6	2.61351	6.11989	0.230271	0.918974	1	0.6	-0.171389	-1.12614	0.905528	0.993629	1
o__Clostridiales, 191387	0.4	2.31951	4.99162	0.330351	0.786548	1	0.8	3.29206	9.79512	0.154282	0.76967	1	0.8	0.972555	1.96231	0.458231	0.993871	1	0	0.694867	1.61874	0.802979	0.90078	1	0.4	-1.62464	-3.08366	0.42435	0.918974	1	0.8	-2.5972	-6.0511	0.182624	0.993629	1
o__Clostridiales, M70574:46:000000000-J6F43:1:1107:11270:19427 1:N:0:ACCTGGAT+AGGTCATT/M70574:46:000000000-J6F43:1:1107:11270:19427 2:N:0:ACCTGGAT+AGGTCATT	0.4	2.30597	4.94498	0.331451	0.786548	1	0	0.437256	1.35403	0.877825	0.946826	1	0.4	-1.86871	-3.65206	0.377225	0.993871	1	0.6	3.02618	8.14647	0.193495	0.739844	1	0.6	0.720209	1.64742	0.59185	0.963978	1	0.6	2.58892	6.01648	0.20957	0.993629	1
g__Lactobacillus, 47365	0.4	2.40329	5.29009	0.332125	0.786732	1	2.6	4.90481	29.9567	0.0371374	0.76967	1	2.6	2.50152	5.6628	0.0668286	0.993871	1	6	6.19769	73.3991	0.00795477	0.238816	1	6	3.7944	13.8748	0.00443534	0.918974	1	6	1.29288	2.45017	0.233086	0.993629	1
g__Allobaculum, M70574:46:000000000-J6F43:1:2104:24450:8186 1:N:0:ACCTGGAT+AGGTCATT/M70574:46:000000000-J6F43:1:2104:24450:8186 2:N:0:ACCTGGAT+AGGTCATT	0.4	2.3077	4.95092	0.332772	0.786914	1	0	0.437219	1.35399	0.878136	0.946826	1	0.4	-1.87048	-3.65653	0.37882	0.993871	1	0.6	3.0167	8.09317	0.196709	0.739844	1	0.6	0.709009	1.63468	0.601864	0.963978	1	0.6	2.57949	5.97727	0.213555	0.993629	1
g__Roseburia, 531436	0.4	2.30738	4.94982	0.334562	0.788447	1	0.4	2.49323	5.63036	0.296608	0.76967	1	0.4	0.18585	1.13749	0.897739	0.993871	1	0.4	2.58534	6.00157	0.278904	0.745217	1	0.4	0.277964	1.21248	0.847388	0.963978	1	0.4	0.0921138	1.06593	0.949009	0.997082	1
s__muciniphila, 182176	0.4	2.30687	4.94808	0.334374	0.788447	1	0	0.43721	1.35398	0.878386	0.946826	1	0.4	-1.86966	-3.65447	0.380759	0.993871	1	0.8	3.42883	10.7691	0.138256	0.739844	1	0.8	1.12196	2.17642	0.394569	0.918974	1	0.8	2.99162	7.95364	0.143886	0.993629	1
g__Lactobacillus, 354971	0.4	2.42782	5.38078	0.337433	0.788486	1	1.4	4.2476	18.9957	0.0803571	0.76967	1	1.4	1.81979	3.53029	0.220575	0.993871	1	1.2	4.1732	18.0409	0.0866164	0.739844	1	1.2	1.74538	3.35283	0.24329	0.918974	1	1.4	-0.0744061	-1.05293	0.95492	0.997082	1
g__Coprococcus, 266621	9.8	-0.859065	-1.81386	0.336797	0.788486	1	9.8	-0.093445	-1.06691	0.915601	0.965047	1	9	0.76562	1.7001	0.391776	0.993871	1	9.8	-0.776765	-1.71328	0.387724	0.794631	1	6.4	0.0823001	1.0587	0.92804	0.977592	1	9	-0.68332	-1.60583	0.447156	0.993629	1
g__Oscillospira, 259506	0.4	2.29229	4.89834	0.337043	0.788486	1	0.6	2.92117	7.57461	0.212114	0.76967	1	0.6	0.62888	1.54636	0.646107	0.993871	1	0	0.696633	1.62072	0.802538	0.90078	1	0.4	-1.59566	-3.02232	0.433785	0.918974	1	0.6	-2.22454	-4.67361	0.262125	0.993629	1
o__Clostridiales, 231563	0.4	-2.06739	-4.19129	0.335489	0.788486	1	0.4	0.102133	1.07336	0.945389	0.97244	1	0.4	2.16953	4.49876	0.308429	0.993871	1	0.4	0.245523	1.18552	0.868251	0.936882	1	0.4	2.31292	4.96887	0.275829	0.918974	1	0.4	0.14339	1.1045	0.921555	0.993629	1
o__Clostridiales, M70574:46:000000000-J6F43:1:2106:13031:23386 1:N:0:GTGCCATA+AGGTCATT/M70574:46:000000000-J6F43:1:2106:13031:23386 2:N:0:GTGCCATA+AGGTCATT	0.4	-2.06062	-4.17165	0.336489	0.788486	1	0.4	-1.92565	-3.79908	0.372711	0.776342	1	0	0.134967	1.09807	0.959244	0.993871	1	0.6	0.683511	1.60604	0.627571	0.90078	1	0.6	2.74413	6.69985	0.185407	0.918974	1	0.6	2.60916	6.1015	0.211662	0.993629	1
o__Clostridiales, 441468	0.4	2.35037	5.09954	0.345367	0.78901	1	0.4	2.42658	5.37619	0.331817	0.76967	1	0.4	0.0762164	1.05425	0.962334	0.993871	1	1.4	3.86543	14.5751	0.107054	0.739844	1	1.4	1.51506	2.85811	0.296412	0.918974	1	1.4	1.43885	2.71104	0.32684	0.993629	1
g__Oscillospira, 422283	0.4	-2.03669	-4.10303	0.354226	0.78901	1	1	1.08573	2.12244	0.449936	0.862743	1	1	3.12242	8.70845	0.13461	0.993871	1	0.4	-1.63897	-3.11444	0.440425	0.804533	1	0	0.397717	1.31742	0.87881	0.963978	1	1	-2.7247	-6.61022	0.174991	0.993629	1
f__Ruminococcaceae, 358030	1.6	1.37043	2.58547	0.351058	0.78901	1	0.4	-2.29485	-4.90704	0.313607	0.76967	1	1.6	-3.66528	-12.687	0.0917796	0.993871	1	0.8	0.630884	1.54851	0.683282	0.90078	1	1.6	-0.739542	-1.66965	0.594528	0.963978	1	0.8	2.92574	7.59862	0.18882	0.993629	1
s__reuteri, 354256	0.4	2.33968	5.0619	0.347767	0.78901	1	0.8	3.35917	10.2615	0.165214	0.76967	1	0.8	1.01949	2.0272	0.493265	0.993871	1	2.8	5.03507	32.7874	0.0328875	0.5472	1	2.8	2.69539	6.47728	0.052043	0.918974	1	2.8	1.6759	3.19518	0.181715	0.993629	1
f__Lachnospiraceae, 344726	9	0.94967	1.93143	0.34252	0.78901	1	7.4	0.766786	1.70148	0.446468	0.858736	1	9	-0.182884	-1.13515	0.851065	0.993871	1	9	1.06347	2.08995	0.289184	0.749455	1	9	0.113798	1.08207	0.906615	0.971539	1	9	0.296682	1.22832	0.761374	0.993629	1
f__S24-7, 341448	0.4	2.27612	4.84372	0.353203	0.78901	1	0	0.43684	1.35364	0.880526	0.946826	1	0.4	-1.83928	-3.5783	0.403391	0.993871	1	1.4	4.13435	17.5616	0.0769549	0.739844	1	1.4	1.85823	3.62564	0.173309	0.918974	1	1.4	3.69751	12.9736	0.0745348	0.993629	1
g__Oscillospira, 312269	22.4	-0.907891	-1.8763	0.341215	0.78901	1	22.4	-1.45826	-2.74777	0.131151	0.76967	1	10.8	-0.550371	-1.46446	0.571516	0.993871	1	22.4	-1.7006	-3.25037	0.0809819	0.739844	1	10.8	-0.792713	-1.73233	0.419137	0.918974	1	6.8	-0.242342	-1.18291	0.807183	0.993629	1
g__Oscillospira, 306699	6.8	-1.16159	-2.23704	0.346615	0.78901	1	6.8	-0.335849	-1.26212	0.781539	0.946826	1	4.6	0.825744	1.77245	0.505354	0.993871	1	6.8	-0.861891	-1.81742	0.484452	0.844733	1	3.6	0.299702	1.23089	0.812118	0.963978	1	4.6	-0.526042	-1.43997	0.670964	0.993629	1
f__Ruminococcaceae, 293818	0.4	2.29181	4.89669	0.340213	0.78901	1	0	0.437037	1.35382	0.878837	0.946826	1	0.4	-1.85477	-3.61694	0.387834	0.993871	1	0.6	3.04967	8.28023	0.194929	0.739844	1	0.6	0.757865	1.69099	0.585429	0.963978	1	0.6	2.61263	6.11619	0.211643	0.993629	1
o__Clostridiales, 273091	24.2	0.99657	1.99525	0.352149	0.78901	1	29	1.46627	2.76306	0.170262	0.76967	1	29	0.469696	1.38482	0.656328	0.993871	1	33.2	1.60509	3.04214	0.133262	0.739844	1	33.2	0.608518	1.52469	0.564228	0.963978	1	33.2	0.138822	1.10101	0.895164	0.993629	1
o__Clostridiales, 270480	1.2	-1.42197	-2.67952	0.343024	0.78901	1	1.2	-0.447148	-1.36334	0.745259	0.946826	1	0.8	0.974827	1.96541	0.52564	0.993871	1	2.2	0.958014	1.94263	0.450582	0.812342	1	2.2	2.37999	5.20533	0.0986903	0.918974	1	2.2	1.40516	2.64848	0.284348	0.993629	1
o__Clostridiales, 270448	0.4	-2.08984	-4.25701	0.338853	0.78901	1	0.4	0.025558	1.01787	0.986894	0.991922	1	0.4	2.1154	4.33309	0.331442	0.993871	1	0.6	0.656174	1.5759	0.655408	0.90078	1	0.6	2.74601	6.70861	0.194764	0.918974	1	0.6	0.630616	1.54823	0.665805	0.993629	1
g__Ruminococcus, 268720	34.8	0.812597	1.75637	0.353246	0.78901	1	37	0.987707	1.98303	0.259109	0.76967	1	37	0.17511	1.12905	0.839801	0.993871	1	37.6	1.13932	2.20277	0.192917	0.739844	1	37.6	0.326719	1.25416	0.705988	0.963978	1	37.6	0.151609	1.11081	0.861017	0.993629	1
f__S24-7, 266976	5.2	1.01235	2.01719	0.352695	0.78901	1	2	-2.01727	-4.04816	0.140821	0.76967	1	5.2	-3.02961	-8.16591	0.0222994	0.993871	1	5.6	1.48406	2.79734	0.170984	0.739844	1	5.6	0.47171	1.38675	0.646284	0.963978	1	5.6	3.50132	11.3241	0.00805661	0.993629	1
s__gnavus, 262633	1.4	1.5165	2.86097	0.344733	0.78901	1	2.4	2.4143	5.33061	0.123663	0.76967	1	2.4	0.897797	1.86322	0.503508	0.993871	1	1.8	2.03132	4.08778	0.201523	0.739844	1	1.8	0.514814	1.42881	0.70667	0.963978	1	2.4	-0.382983	-1.30403	0.772472	0.993629	1
o__Clostridiales, 260756	0.4	-2.05318	-4.1502	0.349147	0.78901	1	0.4	-1.91844	-3.78013	0.38512	0.792625	1	0	0.134743	1.0979	0.959898	0.993871	1	1.4	1.68995	3.22645	0.221769	0.739844	1	1.4	3.74313	13.3904	0.0682725	0.918974	1	1.4	3.60838	12.1964	0.0813077	0.993629	1
f__S24-7, 216902	3.8	1.19796	2.29415	0.343603	0.78901	1	1.8	-1.69439	-3.23641	0.258065	0.76967	1	3.8	-2.89235	-7.42481	0.0454841	0.993871	1	1.8	-1.40995	-2.65729	0.336721	0.794631	1	3.8	-2.60791	-6.09622	0.0652202	0.918974	1	0.6	0.284441	1.21794	0.861167	0.993629	1
f__S24-7, 189171	1.2	-1.47491	-2.77967	0.346328	0.78901	1	1.2	0.0860532	1.06146	0.950665	0.972495	1	1	1.56096	2.95051	0.315269	0.993871	1	1.2	-3.01969	-8.10996	0.153723	0.739844	1	0.4	-1.54478	-2.9176	0.488037	0.963978	1	1	-3.10575	-8.60842	0.140696	0.993629	1
g__Ruminococcus, 189147	19.6	-0.937028	-1.91458	0.351882	0.78901	1	19.6	-0.77551	-1.7118	0.440979	0.851582	1	11.2	0.161517	1.11846	0.87343	0.993871	1	19.6	-1.47089	-2.77192	0.149929	0.739844	1	11.2	-0.533858	-1.4478	0.60387	0.963978	1	10.6	-0.695376	-1.61931	0.499122	0.993629	1
o__Clostridiales, 176172	0.4	2.29436	4.90535	0.343983	0.78901	1	1.4	3.91034	15.0359	0.0914524	0.76967	1	1.4	1.61599	3.06521	0.222828	0.993871	1	0	0.697571	1.62177	0.804463	0.90078	1	0.4	-1.59679	-3.02469	0.44278	0.918974	1	1.4	-3.21277	-9.27131	0.100131	0.993629	1
f__S24-7, 175706	5.6	1.0899	2.1286	0.348958	0.78901	1	2.4	-0.120577	-1.08717	0.921034	0.968734	1	5.6	-1.21048	-2.31415	0.299082	0.993871	1	6.2	1.75065	3.36511	0.129748	0.739844	1	6.2	0.66075	1.5809	0.5488	0.963978	1	6.2	1.87123	3.65845	0.105972	0.993629	1
f__Erysipelotrichaceae, 167420	0.4	2.29181	4.89669	0.340063	0.78901	1	0	0.437037	1.35382	0.878811	0.946826	1	0.4	-1.85477	-3.61694	0.387653	0.993871	1	0.6	3.04967	8.28023	0.194784	0.739844	1	0.6	0.757865	1.69099	0.585088	0.963978	1	0.6	2.61263	6.11619	0.211459	0.993629	1
o__Clostridiales, 1105326	3.2	-1.3767	-2.59673	0.353735	0.78901	1	3.2	-0.595715	-1.51122	0.6788	0.946826	1	1.8	0.780981	1.7183	0.604708	0.993871	1	4.2	0.506768	1.42086	0.716311	0.90078	1	4.2	1.88346	3.6896	0.199122	0.918974	1	4.2	1.10248	2.14724	0.437608	0.993629	1
g__Lactobacillus, 851733	0.4	2.29985	4.92408	0.343032	0.78901	1	0.4	2.4622	5.51057	0.310092	0.76967	1	0.4	0.162349	1.11911	0.914188	0.993871	1	0.6	2.99621	7.97902	0.208321	0.739844	1	0.6	0.696358	1.62041	0.627259	0.963978	1	0.6	0.534009	1.44795	0.709687	0.993629	1
f__Ruminococcaceae, M70574:46:000000000-J6F43:1:2108:14574:10696 1:N:0:GTGCCATA+AGGTCATT/M70574:46:000000000-J6F43:1:2108:14574:10696 2:N:0:GTGCCATA+AGGTCATT	0.4	-2.01722	-4.04804	0.353084	0.78901	1	0.4	-1.88276	-3.68781	0.389631	0.797157	1	0	0.134461	1.09768	0.959668	0.993871	1	0.8	1.05973	2.08454	0.452739	0.813479	1	0.8	3.07695	8.43831	0.136572	0.918974	1	0.8	2.94249	7.68739	0.157964	0.993629	1
f__Ruminococcaceae, M70574:46:000000000-J6F43:1:1104:18483:16767 1:N:0:GTGCCATA+TTCTAGAC/M70574:46:000000000-J6F43:1:1104:18483:16767 2:N:0:GTGCCATA+TTCTAGAC	2.6	-1.15037	-2.21971	0.33928	0.78901	1	2.6	-2.28827	-4.88469	0.0972032	0.76967	1	1.2	-1.13789	-2.2006	0.426726	0.993871	1	2.6	-0.392924	-1.31305	0.735978	0.90078	1	1.8	0.757451	1.6905	0.536834	0.963978	1	1.8	1.89534	3.72011	0.175615	0.993629	1
f__Ruminococcaceae, M70574:46:000000000-J6F43:1:1108:5101:7304 1:N:0:TGAATCCG+TAAGATCC/M70574:46:000000000-J6F43:1:1108:5101:7304 2:N:0:TGAATCCG+TAAGATCC	4.4	-0.95196	-1.9345	0.349708	0.78901	1	4.4	-0.602754	-1.51861	0.549654	0.946826	1	2.6	0.349206	1.27386	0.736989	0.993871	1	4.4	-2.52914	-5.77229	0.0369287	0.577206	1	2.6	-1.57718	-2.98387	0.203074	0.918974	1	2.6	-1.92639	-3.80103	0.117457	0.993629	1
o__RF39, M70574:46:000000000-J6F43:1:2109:25324:6827 1:N:0:ATGCCATA+CCACAGGT/M70574:46:000000000-J6F43:1:2109:25324:6827 2:N:0:ATGCCATA+CCACAGGT	0.4	2.27434	4.83777	0.350075	0.78901	1	0	0.436817	1.35361	0.879907	0.946826	1	0.4	-1.83753	-3.57397	0.399692	0.993871	1	0.6	3.24432	9.4763	0.170579	0.739844	1	0.6	0.969982	1.95882	0.493547	0.963978	1	0.6	2.80751	7.00074	0.182829	0.993629	1
g__Allobaculum, M70574:46:000000000-J6F43:1:1102:17830:16305 1:N:0:GTGCCATA+TAAGATCC/M70574:46:000000000-J6F43:1:1102:17830:16305 2:N:0:GTGCCATA+TAAGATCC	0.4	2.27193	4.8297	0.349867	0.78901	1	1.2	3.83755	14.2961	0.0986088	0.76967	1	1.2	1.56562	2.96004	0.243322	0.993871	1	0	0.698187	1.62246	0.804465	0.90078	1	0.4	-1.57375	-2.97677	0.450789	0.929383	1	1.2	-3.13936	-8.81135	0.109495	0.993629	1
s__distasonis, 174842	0.4	2.27481	4.83932	0.354978	0.789412	1	0.6	2.8391	7.15572	0.240501	0.76967	1	0.6	0.564292	1.47866	0.706691	0.993871	1	0.6	3.0464	8.26147	0.205979	0.739844	1	0.6	0.771593	1.70715	0.602928	0.963978	1	0.6	0.207302	1.15453	0.88354	0.993629	1
s__muciniphila, 363731	6.6	1.08059	2.1149	0.357057	0.791487	1	7.2	1.3888	2.61861	0.235315	0.76967	1	7.2	0.308212	1.23817	0.783765	0.993871	1	5.8	1.30777	2.47558	0.265376	0.739844	1	6.6	0.227179	1.17054	0.840285	0.963978	1	7.2	-0.0810334	-1.05778	0.942531	0.997082	1
f__Ruminococcaceae, M70574:46:000000000-J6F43:1:2114:11705:18588 1:N:0:GTGCCATA+TAAGATCC/M70574:46:000000000-J6F43:1:2114:11705:18588 2:N:0:GTGCCATA+TAAGATCC	0.4	2.2644	4.80453	0.356669	0.791487	1	1.2	3.84043	14.3247	0.10219	0.76967	1	1.2	1.57604	2.98149	0.255986	0.993871	1	0.4	2.5961	6.0465	0.288816	0.749455	1	0.4	0.331705	1.2585	0.830227	0.963978	1	1.2	-1.24433	-2.36909	0.364119	0.993629	1
g__Adlercreutzia, 373939	1.2	1.26061	2.39596	0.358218	0.7924	1	0.8	0.907698	1.87605	0.522907	0.944901	1	1.2	-0.352909	-1.27713	0.77116	0.993871	1	0.6	0.666276	1.58697	0.648362	0.90078	1	1.2	-0.59433	-1.50977	0.637201	0.963978	1	0.8	-0.241421	-1.18216	0.854124	0.993629	1
s__schaedleri, 1871	51.8	-0.852894	-1.80612	0.359191	0.7924	1	51.8	-1.15927	-2.23344	0.213916	0.76967	1	34	-0.306377	-1.2366	0.743137	0.993871	1	51.8	-1.30375	-2.4687	0.163011	0.739844	1	34	-0.450861	-1.36686	0.630306	0.963978	1	26	-0.144483	-1.10533	0.877751	0.993629	1
g__Oscillospira, 4343528	14.6	-0.84968	-1.8021	0.359005	0.7924	1	14.6	-1.57387	-2.97703	0.0978984	0.76967	1	8	-0.724192	-1.65198	0.450795	0.993871	1	14.6	-2.51513	-5.7165	0.0123358	0.319242	1	8	-1.66545	-3.17213	0.100506	0.918974	1	4.2	-0.941261	-1.92021	0.363837	0.993629	1
g__Allobaculum, M70574:46:000000000-J6F43:1:1105:12830:14515 1:N:0:ACCTGTAT+CACTAATG/M70574:46:000000000-J6F43:1:1105:12830:14515 2:N:0:ACCTGTAT+CACTAATG	0.4	2.26464	4.80536	0.359771	0.792414	1	1.2	3.62342	12.3242	0.127475	0.76967	1	1.2	1.35878	2.56468	0.343188	0.993871	1	0	0.701542	1.62624	0.805913	0.90078	1	0.4	-1.5631	-2.95489	0.463953	0.940742	1	1.2	-2.92188	-7.57835	0.148636	0.993629	1
o__Clostridiales, 275293	0.4	2.24567	4.74259	0.361421	0.794782	1	1	3.49278	11.2572	0.140485	0.76967	1	1	1.2471	2.37364	0.381433	0.993871	1	0	0.700528	1.6251	0.805368	0.90078	1	0.4	-1.54515	-2.91834	0.46626	0.940742	1	1	-2.79225	-6.9271	0.165727	0.993629	1
f__Ruminococcaceae, M70574:46:000000000-J6F43:1:2107:28078:16479 1:N:0:ACCTGGAT+AGGTCATT/M70574:46:000000000-J6F43:1:2107:28078:16479 2:N:0:ACCTGGAT+AGGTCATT	3.6	1.26015	2.39521	0.362683	0.796289	1	1.2	0.0196097	1.01369	0.989229	0.993545	1	3.6	-1.24054	-2.36288	0.367437	0.993871	1	1.2	-0.66211	-1.5824	0.664506	0.90078	1	3.6	-1.92226	-3.79017	0.186277	0.918974	1	1.2	-0.68172	-1.60405	0.653672	0.993629	1
o__Clostridiales, 272880	0.4	2.2407	4.72628	0.36622	0.802754	1	0.4	2.53383	5.79106	0.304057	0.76967	1	0.4	0.293124	1.22529	0.852739	0.993871	1	0.6	3.26897	9.63956	0.174782	0.739844	1	0.6	1.02826	2.03957	0.489994	0.963978	1	0.6	0.735139	1.66456	0.615892	0.993629	1
g__Allobaculum, M70574:46:000000000-J6F43:1:2111:6415:11318 1:N:0:ACCTGGAT+CACTAATG/M70574:46:000000000-J6F43:1:2111:6415:11318 2:N:0:ACCTGGAT+CACTAATG	0.4	2.2556	4.77533	0.36679	0.802754	1	1	3.46336	11.03	0.151095	0.76967	1	1	1.20776	2.30979	0.417817	0.993871	1	1.2	4.03834	16.4309	0.0909081	0.739844	1	1.2	1.78274	3.44079	0.219533	0.918974	1	1.2	0.574975	1.48965	0.657466	0.993629	1
g__Ruminococcus, M70574:46:000000000-J6F43:1:2110:23470:18410 1:N:0:ACCTGGAT+CACTAATG/M70574:46:000000000-J6F43:1:2110:23470:18410 2:N:0:ACCTGGAT+CACTAATG	0.4	-2.02168	-4.06058	0.367606	0.803266	1	1.4	1.47381	2.77755	0.317268	0.76967	1	1.4	3.4955	11.2784	0.0975089	0.993871	1	0.4	-1.62218	-3.07841	0.454934	0.814033	1	0	0.399501	1.31905	0.879903	0.963978	1	1.4	-3.096	-8.55042	0.12755	0.993629	1
f__S24-7, 268734	18.2	0.617227	1.53392	0.36852	0.803991	1	10.6	0.0250078	1.01749	0.971428	0.983042	1	18.2	-0.59222	-1.50756	0.386346	0.993871	1	12.4	0.331575	1.25839	0.633061	0.90078	1	18.2	-0.285652	-1.21896	0.674377	0.963978	1	12.4	0.306567	1.23676	0.657666	0.993629	1
f__S24-7, 264534	2.4	-1.17004	-2.25018	0.369203	0.804209	1	2.4	-4.36224	-20.5668	0.0427319	0.76967	1	1	-3.1922	-9.14004	0.144575	0.993871	1	2.4	-1.17806	-2.26272	0.374972	0.794631	1	1	-0.00801645	-1.00557	0.995379	0.998388	1	0.8	3.18418	9.08939	0.148328	0.993629	1
g__Ruminococcus, 323583	18	-0.664321	-1.58482	0.370495	0.80433	1	18	-0.762574	-1.69651	0.306944	0.76967	1	11.4	-0.0982522	-1.07048	0.896052	0.993871	1	18	-0.920584	-1.89288	0.220974	0.739844	1	11.4	-0.256263	-1.19438	0.73521	0.963978	1	9.6	-0.158011	-1.11575	0.835774	0.993629	1
o__Clostridiales, 271107	0.4	-2.08763	-4.25051	0.371005	0.80433	1	1	0.961339	1.94712	0.558177	0.946826	1	1	3.04897	8.27623	0.173073	0.993871	1	1.4	1.67126	3.18493	0.294806	0.752776	1	1.4	3.75889	13.5375	0.0881126	0.918974	1	1.4	0.709921	1.63571	0.624829	0.993629	1
o__RF39, M70574:46:000000000-J6F43:1:1116:3690:15041 1:N:0:ACCTGGAT+TAACTCTG/M70574:46:000000000-J6F43:1:1116:3690:15041 2:N:0:ACCTGGAT+TAACTCTG	2.2	1.26345	2.40069	0.370686	0.80433	1	1.8	1.10923	2.1573	0.437375	0.848266	1	2.2	-0.154221	-1.11282	0.905533	0.993871	1	0.8	-0.390207	-1.31058	0.806204	0.90078	1	2.2	-1.65365	-3.1463	0.262582	0.918974	1	1.8	-1.49943	-2.82732	0.314974	0.993629	1
o__Clostridiales, 339351	1.2	1.27981	2.42807	0.371752	0.804685	1	2.4	2.4159	5.33653	0.07953	0.76967	1	2.4	1.13609	2.19785	0.327616	0.993871	1	3.4	2.81878	7.05568	0.0391912	0.581969	1	3.4	1.53898	2.90588	0.179892	0.918974	1	3.4	0.402883	1.32215	0.708626	0.993629	1
g__Lactobacillus, 539647	0.4	2.2592	4.78726	0.373213	0.806048	1	2.2	4.68783	25.7738	0.0511621	0.76967	1	2.2	2.42863	5.38382	0.0996605	0.993871	1	2.8	5.18543	36.3889	0.0303954	0.526115	1	2.8	2.92622	7.60118	0.0451733	0.918974	1	2.8	0.497593	1.41186	0.68212	0.993629	1
o__Clostridiales, 4480176	110.8	-1.12786	-2.18535	0.373653	0.806048	1	139.8	-0.765873	-1.7004	0.545689	0.946826	1	139.8	0.36199	1.2852	0.775331	0.993871	1	96.6	-1.06312	-2.08945	0.401809	0.794631	1	110.8	0.0647403	1.0459	0.959307	0.989169	1	139.8	-0.297249	-1.2288	0.814743	0.993629	1
o__Clostridiales, M70574:46:000000000-J6F43:1:1107:5680:14089 1:N:0:GTGCCATA+TTCTAGAC/M70574:46:000000000-J6F43:1:1107:5680:14089 2:N:0:GTGCCATA+TTCTAGAC	21.2	-0.887308	-1.84972	0.374132	0.806048	1	21.2	-1.01772	-2.02471	0.30936	0.76967	1	18.4	-0.130407	-1.0946	0.8968	0.993871	1	21.2	-1.14737	-2.2151	0.253103	0.739844	1	18.4	-0.260064	-1.19753	0.796454	0.963978	1	16	-0.129656	-1.09403	0.897952	0.993629	1
f__Ruminococcaceae, 389529	5	-0.931944	-1.90784	0.377223	0.81072	1	5	-0.853947	-1.80744	0.420142	0.827697	1	2.8	0.0779973	1.05555	0.942641	0.993871	1	5.4	0.197561	1.14676	0.847079	0.924756	1	5.4	1.1295	2.18784	0.282073	0.918974	1	5.4	1.05151	2.07269	0.31842	0.993629	1
g__Candidatus Arthromitus, 1058952	0.4	2.24378	4.73636	0.378062	0.81072	1	1	3.81997	14.1229	0.117537	0.76967	1	1	1.57619	2.98182	0.305252	0.993871	1	0.4	2.83653	7.14298	0.258631	0.739844	1	0.4	0.592749	1.50812	0.718915	0.963978	1	1	-0.983442	-1.97718	0.506268	0.993629	1
o__Clostridiales, M70574:46:000000000-J6F43:1:2109:23152:15956 1:N:0:GTGCCATA+GTGTGTCA/M70574:46:000000000-J6F43:1:2109:23152:15956 2:N:0:GTGCCATA+GTGTGTCA	2.6	-1.2905	-2.44613	0.377785	0.81072	1	2.6	-0.651431	-1.57073	0.649533	0.946826	1	1.8	0.639073	1.55733	0.667223	0.993871	1	2.6	-1.16111	-2.2363	0.430562	0.799202	1	1.2	0.129391	1.09383	0.93236	0.978207	1	1.8	-0.509682	-1.42374	0.733345	0.993629	1
o__Clostridiales, 260156	2.4	-0.995282	-1.99347	0.382168	0.818255	1	2.4	-0.491322	-1.40573	0.657896	0.946826	1	1.6	0.503961	1.4181	0.66547	0.993871	1	2.6	0.208154	1.15521	0.845918	0.924405	1	2.6	1.20344	2.30288	0.286492	0.918974	1	2.6	0.699475	1.62391	0.524649	0.993629	1
o__Clostridiales, 4405146	13.2	-0.800289	-1.74145	0.382865	0.818478	1	13.2	-1.23173	-2.34848	0.185257	0.76967	1	10	-0.431439	-1.34858	0.645329	0.993871	1	13.2	-1.22586	-2.33894	0.188685	0.739844	1	10	-0.425569	-1.3431	0.650793	0.963978	1	6.8	0.0058702	1.00408	0.995083	0.999433	1
g__Allobaculum, 276236	1.2	1.29992	2.46214	0.383941	0.81951	1	3.8	3.04394	8.24739	0.0322743	0.76967	1	3.8	1.74402	3.34968	0.149189	0.993871	1	1.2	1.5798	2.98929	0.289519	0.749455	1	1.2	0.279888	1.2141	0.828294	0.963978	1	3.8	-1.46413	-2.75898	0.22522	0.993629	1
o__Clostridiales, 274597	0.4	-2.01166	-4.03245	0.385184	0.820894	1	0.8	1.08061	2.11493	0.502981	0.929876	1	0.8	3.09226	8.52833	0.161232	0.993871	1	1.2	1.85303	3.61257	0.235974	0.739844	1	1.2	3.86468	14.5675	0.07508	0.918974	1	1.2	0.772418	1.70813	0.580213	0.993629	1
g__Dorea, 839200	23.6	1.55412	2.93654	0.386476	0.822378	1	39.2	2.31289	4.96878	0.196915	0.76967	1	39.2	0.758772	1.69205	0.669238	0.993871	1	60	3.31929	9.98171	0.0637624	0.739353	1	60	1.76517	3.39913	0.319797	0.918974	1	60	1.0064	2.00889	0.570093	0.993629	1
o__Clostridiales, 418334	2.4	1.30053	2.46319	0.390284	0.823344	1	1.2	0.495431	1.40974	0.752918	0.946826	1	2.4	-0.805099	-1.74727	0.579707	0.993871	1	0.8	-0.614807	-1.53135	0.721126	0.90078	1	2.4	-1.91534	-3.77202	0.235163	0.918974	1	1.2	-1.11024	-2.15881	0.506119	0.993629	1
f__Ruminococcaceae, 335391	1.2	-1.3345	-2.52188	0.391629	0.823344	1	1.2	-0.664401	-1.58491	0.654826	0.946826	1	0.8	0.670098	1.59118	0.677778	0.993871	1	1.2	-3.06225	-8.35274	0.151249	0.739844	1	0.4	-1.72775	-3.31211	0.437201	0.918974	1	0.8	-2.39785	-5.27016	0.270094	0.993629	1
s__gnavus, 320844	4	1.03134	2.04392	0.391596	0.823344	1	4.6	1.37973	2.6022	0.249577	0.76967	1	4.6	0.348393	1.27314	0.758861	0.993871	1	8.6	2.15228	4.44531	0.069096	0.739844	1	8.6	1.12095	2.1749	0.316809	0.918974	1	8.6	0.772553	1.70829	0.487956	0.993629	1
g__Lactobacillus, 308249	0.4	2.20291	4.60408	0.388902	0.823344	1	0	0.436345	1.35317	0.883923	0.947011	1	0.4	-1.76657	-3.40244	0.445558	0.993871	1	2	4.52704	23.0555	0.0619405	0.737412	1	2	2.32412	5.00762	0.126362	0.918974	1	2	4.09069	17.0381	0.0593666	0.993629	1
f__S24-7, 270984	1.4	-1.13188	-2.19143	0.391414	0.823344	1	1.4	-0.356626	-1.28043	0.774882	0.946826	1	1	0.775249	1.71149	0.56442	0.993871	1	1.4	-3.29299	-9.80143	0.102444	0.739844	1	0.6	-2.16112	-4.47261	0.298478	0.918974	1	1	-2.93637	-7.65481	0.148554	0.993629	1
o__Clostridiales, 264155	2.6	1.24549	2.37099	0.393488	0.823344	1	1.2	0.360251	1.28365	0.812593	0.946826	1	2.6	-0.885241	-1.84707	0.532503	0.993871	1	1.6	0.896364	1.86137	0.547391	0.90078	1	2.6	-0.349127	-1.27379	0.801166	0.963978	1	1.6	0.536113	1.45006	0.711442	0.993629	1
f__S24-7, 198339	10.4	-0.661256	-1.58146	0.393001	0.823344	1	10.4	-0.471108	-1.38617	0.542364	0.946826	1	7	0.190148	1.14088	0.808003	0.993871	1	10.4	-0.47028	-1.38538	0.544575	0.90078	1	7	0.190976	1.14154	0.807869	0.963978	1	6.8	0.000828439	1.00057	0.999157	0.999433	1
f__S24-7, 194710	6.8	-0.914566	-1.885	0.390844	0.823344	1	6.8	-1.32046	-2.49746	0.225714	0.76967	1	3.4	-0.405896	-1.32491	0.714094	0.993871	1	6.8	0.116215	1.08389	0.911409	0.952077	1	5.8	1.03078	2.04313	0.332309	0.918974	1	5.8	1.43668	2.70697	0.18645	0.993629	1
f__Lachnospiraceae, 194087	1.2	1.28509	2.43697	0.392568	0.823344	1	0.8	0.958916	1.94385	0.535239	0.946826	1	1.2	-0.326173	-1.25368	0.808142	0.993871	1	0.8	1.06855	2.09732	0.489164	0.849731	1	1.2	-0.216544	-1.16195	0.871753	0.963978	1	0.8	0.10963	1.07895	0.937133	0.99629	1
o__Clostridiales, 187989	1.4	1.2151	2.32157	0.389999	0.823344	1	0.4	-0.244151	-1.1844	0.878937	0.946826	1	1.4	-1.45925	-2.74966	0.315132	0.993871	1	0.4	-1.93196	-3.81573	0.36701	0.794631	1	1.4	-3.14706	-8.85847	0.12138	0.918974	1	0.4	-1.68781	-3.22167	0.436206	0.993629	1
f__S24-7, 177269	2.6	1.00483	2.00671	0.39262	0.823344	1	1.2	-1.21364	-2.31921	0.391528	0.79835	1	2.6	-2.21847	-4.65398	0.0988046	0.993871	1	1.8	0.76631	1.70091	0.523617	0.887258	1	2.6	-0.238519	-1.17978	0.830647	0.963978	1	1.8	1.97995	3.94478	0.147471	0.993629	1
f__S24-7, 177917	6	-1.00933	-2.01297	0.395383	0.826058	1	6	-0.535344	-1.44929	0.649216	0.946826	1	3.8	0.473984	1.38894	0.69247	0.993871	1	6	-2.46742	-5.53055	0.0582532	0.711927	1	2.8	-1.45809	-2.74745	0.270168	0.918974	1	3.8	-1.93208	-3.81605	0.141092	0.993629	1
s__uniformis, 589071	1	-1.29524	-2.45418	0.397477	0.829179	1	1	-1.21106	-2.31508	0.431527	0.839864	1	0.8	0.0841807	1.06009	0.958606	0.993871	1	1	-1.69378	-3.23503	0.296261	0.752776	1	0.8	-0.398537	-1.31817	0.814641	0.963978	1	0.8	-0.482717	-1.39737	0.777458	0.993629	1
o__Clostridiales, 188697	1.6	-1.1772	-2.26138	0.398292	0.829625	1	2	0.135926	1.0988	0.916131	0.965047	1	2	1.31313	2.4848	0.341495	0.993871	1	2.4	0.726002	1.65405	0.566128	0.90078	1	2.4	1.90321	3.74043	0.160686	0.918974	1	2.4	0.590075	1.50533	0.637093	0.993629	1
o__Clostridiales, 194340	119	-1.08249	-2.11769	0.399814	0.830895	1	112.2	-1.16508	-2.24245	0.364946	0.771807	1	119	-0.0825854	-1.05891	0.948823	0.993871	1	112.2	-1.50361	-2.83551	0.242576	0.739844	1	119	-0.421119	-1.33897	0.743586	0.963978	1	107.8	-0.338534	-1.26447	0.792628	0.993629	1
o__Clostridiales, 2120775	12.8	-0.873331	-1.83189	0.400105	0.830895	1	12.8	-1.56827	-2.96549	0.136915	0.76967	1	10.8	-0.694941	-1.61882	0.512562	0.993871	1	12.8	-1.03856	-2.05418	0.320367	0.785839	1	10.8	-0.165231	-1.12135	0.875198	0.963978	1	8.8	0.52971	1.44364	0.620002	0.993629	1
o__Clostridiales, 327284	14.4	-0.693688	-1.61741	0.400728	0.830938	1	14.4	-1.0688	-2.09769	0.201841	0.76967	1	10	-0.375116	-1.29694	0.656749	0.993871	1	14.4	-1.2108	-2.31466	0.151691	0.739844	1	10	-0.517112	-1.43109	0.54352	0.963978	1	6.6	-0.141996	-1.10343	0.869273	0.993629	1
f__Ruminococcaceae, 268410	16.2	-0.750044	-1.68184	0.404118	0.836036	1	16.2	-1.08671	-2.1239	0.230352	0.76967	1	15	-0.336669	-1.26284	0.71163	0.993871	1	16.2	-0.958331	-1.94306	0.290032	0.749455	1	15	-0.208286	-1.15531	0.819051	0.963978	1	11.2	0.128383	1.09307	0.888703	0.993629	1
o__Clostridiales, 239562	58.4	-0.89543	-1.86016	0.404397	0.836036	1	58.2	-0.904445	-1.87182	0.399884	0.805014	1	58.4	-0.00901519	-1.00627	0.993313	0.999402	1	54.2	-0.9372	-1.91481	0.383245	0.794631	1	58.4	-0.0417703	-1.02938	0.969039	0.991291	1	58.2	-0.0327551	-1.02296	0.975729	0.997082	1
o__Clostridiales, 269775	3.6	-1.16934	-2.24909	0.406504	0.839137	1	3.6	-1.60719	-3.04659	0.266235	0.76967	1	1.8	-0.437851	-1.35458	0.767106	0.993871	1	3.6	-1.64477	-3.12697	0.2588	0.739844	1	1.8	-0.475423	-1.39033	0.749523	0.963978	1	1	-0.0375721	-1.02639	0.980332	0.99803	1
g__Allobaculum, M70574:46:000000000-J6F43:1:1111:10132:8992 1:N:0:ACCTGGAT+TAACTCTG/M70574:46:000000000-J6F43:1:1111:10132:8992 2:N:0:ACCTGGAT+TAACTCTG	1.2	1.17834	2.26316	0.409545	0.844152	1	0.4	0.117537	1.08488	0.940376	0.97244	1	1.2	-1.0608	-2.08609	0.44864	0.993871	1	0.4	-1.74811	-3.35918	0.414286	0.79601	1	1.2	-2.92645	-7.60235	0.147196	0.918974	1	0.4	-1.86565	-3.64431	0.379347	0.993629	1
o__YS2, M70574:46:000000000-J6F43:1:2101:23751:16565 1:N:0:ACCTGGAT+GTGTGTCA/M70574:46:000000000-J6F43:1:2101:23751:16565 2:N:0:ACCTGGAT+GTGTGTCA	50.4	-1.53497	-2.89783	0.411009	0.845906	1	50.4	-1.59624	-3.02354	0.392706	0.79835	1	49.8	-0.0612618	-1.04338	0.973855	0.994744	1	50.4	-1.49843	-2.82535	0.422363	0.79601	1	49.8	0.0365437	1.02565	0.984402	0.996175	1	46.8	0.0978056	1.07014	0.958281	0.997082	1
g__Roseburia, 261698	1.2	-1.22329	-2.33479	0.411879	0.846435	1	1.2	-0.403718	-1.32291	0.774774	0.946826	1	1	0.819577	1.76489	0.58927	0.993871	1	1.2	-0.341943	-1.26746	0.808983	0.901699	1	1	0.881352	1.8421	0.562376	0.963978	1	1	0.0617746	1.04375	0.965859	0.997082	1
f__Lachnospiraceae, 266583	1	-1.33637	-2.52515	0.41299	0.847458	1	1.2	-0.0581376	-1.04112	0.969059	0.982578	1	1.2	1.27823	2.42541	0.433198	0.993871	1	1.6	0.279904	1.21411	0.850061	0.927278	1	1.6	1.61627	3.06582	0.316703	0.918974	1	1.6	0.338041	1.26404	0.819216	0.993629	1
f__Flavobacteriaceae, M70574:46:000000000-J6F43:1:2103:22261:16041 1:N:0:ACCTGGAT+TAACTCTG/M70574:46:000000000-J6F43:1:2103:22261:16041 2:N:0:ACCTGGAT+TAACTCTG	2.4	1.38384	2.60962	0.418102	0.856676	1	2.2	1.32266	2.50127	0.441516	0.851582	1	2.4	-0.0611769	-1.04332	0.969413	0.994744	1	1.6	1.25839	2.39229	0.466232	0.826529	1	2.4	-0.125446	-1.09085	0.937686	0.979534	1	2.2	-0.0642695	-1.04556	0.968251	0.997082	1
s__gnavus, 273776	1.2	1.3689	2.58273	0.419714	0.858703	1	2	2.26848	4.81816	0.171942	0.76967	1	2	0.899585	1.86553	0.541609	0.993871	1	1.6	2.19897	4.59152	0.187324	0.739844	1	1.6	0.830074	1.77778	0.575343	0.963978	1	2	-0.0695111	-1.04936	0.961517	0.997082	1
g__Ruminococcus, 279659	8.4	-0.966332	-1.95387	0.424146	0.866488	1	8.4	-0.68578	-1.60857	0.569698	0.946826	1	7	0.280552	1.21466	0.81795	0.993871	1	8.4	-0.403084	-1.32233	0.73756	0.90078	1	7.2	0.563248	1.47759	0.643081	0.963978	1	7.2	0.282696	1.21647	0.815681	0.993629	1
o__Clostridiales, 271592	1	-1.13867	-2.20178	0.42517	0.867297	1	1	-2.9538	-7.74786	0.161985	0.76967	1	0.4	-1.81513	-3.5189	0.410037	0.993871	1	1	-2.69071	-6.45629	0.182369	0.739844	1	0.4	-1.55203	-2.9323	0.462614	0.940742	1	0	0.263093	1.20005	0.920145	0.993629	1
g__Oscillospira, 581933	1.6	1.11702	2.16898	0.426635	0.867632	1	0.6	-0.369978	-1.29233	0.816678	0.946826	1	1.6	-1.48699	-2.80304	0.309927	0.993871	1	0.6	-2.06949	-4.19737	0.333219	0.794631	1	1.6	-3.1865	-9.10402	0.118723	0.918974	1	0.4	-1.69951	-3.2479	0.435238	0.993629	1
o__Clostridiales, 290338	21.2	-0.856075	-1.81011	0.427198	0.867632	1	21.2	-0.837218	-1.7866	0.437953	0.848266	1	19.8	0.0188564	1.01316	0.986112	0.995727	1	21.2	-0.977044	-1.96843	0.36649	0.794631	1	19.8	-0.120969	-1.08747	0.911291	0.971539	1	17.6	-0.139825	-1.10177	0.897645	0.993629	1
o__Clostridiales, 276052	12.8	-0.844051	-1.79508	0.428476	0.867632	1	12.8	-2.79253	-6.92843	0.0158145	0.532679	1	7.2	-1.94848	-3.85967	0.0946661	0.993871	1	12.8	-2.83658	-7.14325	0.015244	0.369333	1	7.2	-1.99253	-3.97934	0.0906286	0.918974	1	1.6	-0.0440521	-1.03101	0.972126	0.997082	1
g__Odoribacter, 3906666	40.8	-0.603359	-1.51925	0.427953	0.867632	1	40.8	-0.421456	-1.33928	0.579688	0.946826	1	33.6	0.181903	1.13438	0.811528	0.993871	1	40.8	-0.797612	-1.73822	0.296949	0.752776	1	32.8	-0.194253	-1.14413	0.79996	0.963978	1	33.6	-0.376156	-1.29788	0.623569	0.993629	1
g__Ruminococcus, 4417539	57.2	-0.653224	-1.57268	0.427936	0.867632	1	57.2	-1.08223	-2.1173	0.190773	0.76967	1	42	-0.429001	-1.3463	0.604648	0.993871	1	57.2	-1.05002	-2.07056	0.204622	0.739844	1	42	-0.396799	-1.31658	0.632267	0.963978	1	29.8	0.0322015	1.02257	0.96914	0.997082	1
f__S24-7, 177512	3.8	0.799261	1.74021	0.43103	0.871526	1	2.8	0.587023	1.50214	0.568975	0.946826	1	3.8	-0.212238	-1.15848	0.827591	0.993871	1	2	-0.140451	-1.10225	0.896707	0.942483	1	3.8	-0.939713	-1.91815	0.360895	0.918974	1	2.8	-0.727475	-1.65574	0.485896	0.993629	1
g__Coprococcus, 263074	1	-1.11938	-2.17253	0.432701	0.872459	1	1.2	0.36307	1.28616	0.772251	0.946826	1	1.2	1.48245	2.79422	0.286209	0.993871	1	1	-0.479763	-1.39451	0.724633	0.90078	1	0.6	0.639615	1.55791	0.667255	0.963978	1	1.2	-0.842833	-1.79357	0.524219	0.993629	1
o__RF39, 1108747	10	0.919401	1.89133	0.433329	0.872459	1	10	1.00303	2.0042	0.393105	0.79835	1	10	0.0836258	1.05968	0.941923	0.993871	1	4.8	0.303021	1.23372	0.799143	0.90078	1	10	-0.616381	-1.53302	0.596619	0.963978	1	10	-0.700007	-1.62451	0.548157	0.993629	1
f__Christensenellaceae, M70574:46:000000000-J6F43:1:1108:26400:16701 1:N:0:GTGCCATA+TTCTAGAC/M70574:46:000000000-J6F43:1:1108:26400:16701 2:N:0:GTGCCATA+TTCTAGAC	1.6	-1.03225	-2.04521	0.433386	0.872459	1	2.6	0.622429	1.53947	0.603472	0.946826	1	2.6	1.65468	3.14853	0.195401	0.993871	1	1.6	0.0909713	1.06509	0.941321	0.969032	1	1.6	1.12322	2.17833	0.392379	0.918974	1	2.6	-0.531458	-1.44539	0.656103	0.993629	1
g__Parabacteroides, 195123	0.8	-1.19219	-2.285	0.436382	0.875935	1	0.8	-0.311402	-1.24091	0.826726	0.946826	1	0.8	0.88079	1.84138	0.571799	0.993871	1	0.8	-0.859217	-1.81405	0.571152	0.90078	1	0.4	0.332975	1.25961	0.839552	0.963978	1	0.8	-0.547815	-1.46187	0.722633	0.993629	1
g__Bacteroides, 4359056	21.4	-0.734241	-1.66352	0.435923	0.875935	1	21.4	-0.646318	-1.56517	0.493166	0.919112	1	15.2	0.0879231	1.06284	0.926038	0.993871	1	21.4	0.0670429	1.04757	0.943009	0.969032	1	20.8	0.801284	1.74265	0.394894	0.918974	1	20.8	0.713361	1.63962	0.449142	0.993629	1
f__Ruminococcaceae, 186886	25.6	-0.747994	-1.67946	0.438037	0.877982	1	25.6	-1.0024	-2.00332	0.300475	0.76967	1	22.2	-0.254402	-1.19284	0.793341	0.993871	1	25.6	-1.06958	-2.09882	0.270206	0.739844	1	22.2	-0.321583	-1.2497	0.741027	0.963978	1	16.2	-0.0671805	-1.04767	0.945157	0.997082	1
s__muciniphila, 273232	1052.8	-0.733816	-1.66303	0.438844	0.878323	1	1052.8	-1.01773	-2.02473	0.283016	0.76967	1	1012.4	-0.283916	-1.2175	0.76458	0.993871	1	1052.8	-1.21096	-2.31491	0.201501	0.739844	1	1012.4	-0.477142	-1.39198	0.614794	0.963978	1	759.2	-0.193226	-1.14332	0.838528	0.993629	1
f__S24-7, 356226	1.6	-1.06198	-2.0878	0.441542	0.882445	1	1.6	-0.562464	-1.47679	0.676282	0.946826	1	1	0.499517	1.41374	0.723935	0.993871	1	1.6	-0.906532	-1.87453	0.51463	0.87924	1	0.8	0.155449	1.11377	0.914992	0.971539	1	1	-0.344068	-1.26933	0.80923	0.993629	1
o__Clostridiales, 277574	13.4	-0.671006	-1.59218	0.443114	0.883256	1	13.4	-0.671528	-1.59276	0.444375	0.855902	1	10	-0.000521938	-1.00036	0.999529	0.999529	1	13.4	-0.309222	-1.23904	0.723247	0.90078	1	10.8	0.361784	1.28501	0.680883	0.963978	1	10.8	0.362306	1.28548	0.681505	0.993629	1
o__RF32, M70574:46:000000000-J6F43:1:1102:8848:9170 1:N:0:ACCTGGAT+CACTAATG/M70574:46:000000000-J6F43:1:1102:8848:9170 2:N:0:ACCTGGAT+CACTAATG	3.8	1.185	2.27364	0.443227	0.883256	1	1.2	-0.248905	-1.1883	0.878465	0.946826	1	3.8	-1.43391	-2.70177	0.357629	0.993871	1	1.2	0.076043	1.05412	0.962345	0.980087	1	3.8	-1.10896	-2.1569	0.471745	0.948298	1	1.2	0.324948	1.25262	0.841358	0.993629	1
g__Coprococcus, 1105328	36.6	-0.659244	-1.57925	0.445952	0.883587	1	36.6	-0.835806	-1.78485	0.335228	0.76967	1	30.2	-0.176562	-1.13019	0.839078	0.993871	1	36.6	-0.793092	-1.73278	0.360846	0.794631	1	30.2	-0.133849	-1.09722	0.877736	0.963978	1	24.4	0.0427139	1.03005	0.960952	0.997082	1
f__Lachnospiraceae, 3392847	10.8	0.925578	1.89945	0.445181	0.883587	1	13	1.14667	2.21402	0.343934	0.76967	1	13	0.22109	1.16561	0.852622	0.993871	1	10.6	1.17783	2.26237	0.331358	0.794631	1	10.8	0.252257	1.19107	0.83227	0.963978	1	13	0.0311669	1.02184	0.979111	0.99803	1
o__Clostridiales, 1104817	53.8	-0.614924	-1.53148	0.445947	0.883587	1	53.8	-0.844222	-1.7953	0.296668	0.76967	1	38.4	-0.229298	-1.17226	0.777214	0.993871	1	53.8	-1.2129	-2.31803	0.135545	0.739844	1	38.4	-0.597974	-1.51359	0.462598	0.940742	1	28.2	-0.368676	-1.29117	0.651479	0.993629	1
f__F16, 4440970	34.2	-0.61641	-1.53306	0.44431	0.883587	1	34.2	-0.646924	-1.56583	0.422825	0.831796	1	31.2	-0.0305135	-1.02138	0.969913	0.994744	1	34.2	-0.933304	-1.90964	0.249516	0.739844	1	31.2	-0.316894	-1.24565	0.696479	0.963978	1	27.8	-0.28638	-1.21958	0.724862	0.993629	1
f__Lachnospiraceae, 355822	2.6	-0.950431	-1.93245	0.446698	0.883797	1	2.6	-0.739733	-1.66987	0.552439	0.946826	1	1.4	0.210698	1.15725	0.870045	0.993871	1	2.6	-1.22099	-2.33107	0.346701	0.794631	1	1.4	-0.27056	-1.20628	0.839824	0.963978	1	1.4	-0.481258	-1.39596	0.71847	0.993629	1
o__Clostridiales, 307170	3.6	-0.825689	-1.77238	0.449061	0.8872	1	4.8	0.482977	1.39763	0.642215	0.946826	1	4.8	1.30867	2.47712	0.221482	0.993871	1	4.8	0.52098	1.43493	0.616992	0.90078	1	4.8	1.34667	2.54324	0.20925	0.918974	1	4.8	0.0380026	1.02669	0.970291	0.997082	1
g__Oscillospira, 263403	53.4	-0.622938	-1.54001	0.450644	0.889057	1	53.4	-0.946537	-1.92724	0.253438	0.76967	1	39.2	-0.323599	-1.25145	0.696764	0.993871	1	53.4	-1.69846	-3.24554	0.0425589	0.608286	1	39.2	-1.07552	-2.10748	0.199909	0.918974	1	25.8	-0.75192	-1.68403	0.371862	0.993629	1
o__Clostridiales, 356012	8.8	0.693952	1.61771	0.459125	0.893031	1	9.8	1.08541	2.12198	0.245098	0.76967	1	9.8	0.391458	1.31172	0.667516	0.993871	1	5.6	0.0783859	1.05584	0.93473	0.965491	1	8.8	-0.615566	-1.53216	0.510395	0.963978	1	9.8	-1.00702	-2.00976	0.27971	0.993629	1
f__S24-7, 345126	18.8	0.53443	1.44837	0.45759	0.893031	1	12	0.0482877	1.03404	0.947141	0.97244	1	18.8	-0.486142	-1.40069	0.497512	0.993871	1	12	0.0462261	1.03256	0.949533	0.972778	1	18.8	-0.488204	-1.4027	0.496905	0.963978	1	11.6	-0.00206166	-1.00143	0.997739	0.999433	1
f__S24-7, 330772	6.6	-0.856617	-1.81079	0.454683	0.893031	1	6.6	-0.708231	-1.6338	0.536589	0.946826	1	3.6	0.148386	1.10833	0.89832	0.993871	1	6.6	-1.76962	-3.40965	0.140845	0.739844	1	3.2	-0.913005	-1.88296	0.45281	0.931939	1	3.6	-1.06139	-2.08694	0.382897	0.993629	1
f__S24-7, 273182	5.8	0.907627	1.87596	0.45735	0.893031	1	2.8	-1.11587	-2.16725	0.396048	0.799623	1	5.8	-2.02349	-4.06567	0.114613	0.993871	1	2.8	0.188447	1.13954	0.879978	0.937057	1	5.8	-0.71918	-1.64625	0.553556	0.963978	1	2.6	1.30431	2.46966	0.318687	0.993629	1
o__Clostridiales, 273100	8.2	-0.730554	-1.65928	0.458666	0.893031	1	8.2	-1.42123	-2.67813	0.16215	0.76967	1	5.6	-0.690675	-1.61404	0.501282	0.993871	1	8.2	-2.46149	-5.50786	0.0245747	0.518689	1	5.6	-1.73094	-3.31944	0.117103	0.918974	1	3	-1.04026	-2.0566	0.358207	0.993629	1
o__Clostridiales, 259251	1.8	0.931084	1.90671	0.456401	0.893031	1	0.8	-2.72966	-6.63298	0.202424	0.76967	1	1.8	-3.66074	-12.6472	0.077767	0.993871	1	0.8	-0.62499	-1.5422	0.669178	0.90078	1	1.8	-1.55607	-2.94052	0.254068	0.918974	1	0.4	2.10467	4.30098	0.340941	0.993629	1
f__Lachnospiraceae, 258169	5.6	-0.773757	-1.70972	0.454901	0.893031	1	5.6	-0.175021	-1.12898	0.86362	0.946826	1	4.4	0.598736	1.51439	0.563932	0.993871	1	5.6	-0.318047	-1.24664	0.756966	0.90078	1	4	0.45571	1.37146	0.663161	0.963978	1	4.4	-0.143027	-1.10422	0.889555	0.993629	1
g__Ruminococcus, 230268	1	1.13698	2.1992	0.454634	0.893031	1	0.4	-1.88547	-3.69473	0.408616	0.815461	1	1	-3.02245	-8.12544	0.161464	0.993871	1	0.6	0.579865	1.49471	0.718291	0.90078	1	1	-0.557115	-1.47132	0.696295	0.963978	1	0.6	2.46533	5.52254	0.266917	0.993629	1
o__Clostridiales, 1112121	1	1.0231	2.03229	0.457694	0.893031	1	0.4	-1.94586	-3.85266	0.373332	0.776463	1	1	-2.96896	-7.82972	0.151661	0.993871	1	0.4	0.216821	1.16217	0.886283	0.938617	1	1	-0.806284	-1.7487	0.548928	0.963978	1	0.4	2.16268	4.47745	0.317932	0.993629	1
f__Ruminococcaceae, M70574:46:000000000-J6F43:1:2112:16537:22646 1:N:0:ACCTGGAT+TAACTCTG/M70574:46:000000000-J6F43:1:2112:16537:22646 2:N:0:ACCTGGAT+TAACTCTG	7.6	-0.761997	-1.69584	0.458544	0.893031	1	7.6	-0.479925	-1.39467	0.63929	0.946826	1	5	0.282071	1.21594	0.785816	0.993871	1	7.6	-1.30906	-2.4778	0.218402	0.739844	1	5	-0.547063	-1.46111	0.611521	0.963978	1	5	-0.829135	-1.77662	0.439796	0.993629	1
s__distasonis, 291090	21.4	0.851062	1.80383	0.461627	0.896634	1	21.4	0.862038	1.8176	0.456278	0.867935	1	21.4	0.0109753	1.00764	0.992353	0.999402	1	14	0.587446	1.50258	0.612728	0.90078	1	21.4	-0.263616	-1.20048	0.81848	0.963978	1	21.4	-0.274591	-1.20965	0.811232	0.993629	1
o__Clostridiales, 270876	2.2	1.14379	2.20961	0.468328	0.908372	1	1.4	0.841652	1.7921	0.599753	0.946826	1	2.2	-0.302142	-1.23297	0.839222	0.993871	1	0.8	-2.30488	-4.94127	0.308643	0.769379	1	2.2	-3.44868	-10.9183	0.114357	0.918974	1	1.4	-3.14653	-8.85526	0.153312	0.993629	1
f__Lachnospiraceae, 296041	7.4	-0.572296	-1.48689	0.46906	0.908515	1	7.4	-0.337951	-1.26396	0.667985	0.946826	1	5.8	0.234345	1.17637	0.768893	0.993871	1	7.4	-0.727128	-1.65534	0.367367	0.794631	1	5.4	-0.154832	-1.11329	0.849523	0.963978	1	5.8	-0.389177	-1.30965	0.63242	0.993629	1
g__Oscillospira, 199445	1	-1.0278	-2.03892	0.470507	0.910042	1	1	-2.99165	-7.95385	0.159936	0.76967	1	0.4	-1.96385	-3.90102	0.372761	0.993871	1	1	-2.7271	-6.62121	0.180141	0.739844	1	0.4	-1.69929	-3.24742	0.421155	0.918974	1	0	0.264557	1.20127	0.920156	0.993629	1
f__Clostridiaceae, 683621	3.4	0.941389	1.92038	0.47143	0.910552	1	2.2	0.702613	1.62745	0.5955	0.946826	1	3.4	-0.238776	-1.17999	0.849413	0.993871	1	2.6	1.0042	2.00583	0.44507	0.807677	1	3.4	0.0628096	1.0445	0.959882	0.989169	1	2.6	0.301586	1.2325	0.811664	0.993629	1
f__Ruminococcaceae, 273648	7.6	-0.728324	-1.65671	0.472753	0.910561	1	7.6	-0.787374	-1.72593	0.440868	0.851582	1	4.6	-0.0590499	-1.04178	0.954446	0.993871	1	7.6	-1.00013	-2.00018	0.333556	0.794631	1	4.6	-0.271802	-1.20731	0.795026	0.963978	1	3.8	-0.212752	-1.1589	0.839919	0.993629	1
g__Oscillospira, 270866	19.8	-0.507935	-1.42201	0.472145	0.910561	1	19.8	-1.5787	-2.987	0.0314571	0.76967	1	14.4	-1.07076	-2.10054	0.146184	0.993871	1	19.8	-0.982694	-1.97615	0.172477	0.739844	1	14.4	-0.474759	-1.38969	0.511616	0.963978	1	8.6	0.596001	1.51152	0.426895	0.993629	1
g__Dehalobacterium, 351972	32.4	-0.614012	-1.53051	0.47623	0.914707	1	32.4	-0.70851	-1.63412	0.412308	0.816927	1	21.4	-0.0944974	-1.06769	0.913175	0.993871	1	32.4	-1.30214	-2.46594	0.135914	0.739844	1	21.4	-0.688126	-1.61119	0.431965	0.918974	1	16.8	-0.593628	-1.50904	0.498927	0.993629	1
g__Oscillospira, 230725	27	-0.560678	-1.47496	0.475708	0.914707	1	27	-0.342138	-1.26763	0.663154	0.946826	1	20.8	0.21854	1.16356	0.781527	0.993871	1	27	-1.95128	-3.86718	0.0168029	0.400083	1	20.2	-1.3906	-2.62188	0.0893302	0.918974	1	20.8	-1.60914	-3.05071	0.0491426	0.993629	1
o__Clostridiales, 329712	13.6	-0.830255	-1.778	0.477119	0.915141	1	13.6	-1.41815	-2.67243	0.231229	0.76967	1	7.6	-0.587899	-1.50306	0.621968	0.993871	1	13.6	-0.536262	-1.45021	0.645973	0.90078	1	8	0.293993	1.22603	0.802476	0.963978	1	8	0.881893	1.84279	0.459369	0.993629	1
f__Ruminococcaceae, 272213	13.4	-0.67974	-1.60185	0.479435	0.917036	1	13.4	-1.16638	-2.24448	0.232617	0.76967	1	8.6	-0.486641	-1.40118	0.620933	0.993871	1	13.4	-1.64641	-3.13054	0.0993127	0.739844	1	8.6	-0.966672	-1.95433	0.336436	0.918974	1	5	-0.480031	-1.39477	0.638232	0.993629	1
f__Ruminococcaceae, 267905	0.8	-1.01249	-2.01739	0.479187	0.917036	1	0.8	-2.85815	-7.25085	0.177319	0.76967	1	0.4	-1.84566	-3.59417	0.401271	0.993871	1	0.8	-0.307755	-1.23778	0.82	0.908844	1	0.6	0.704737	1.62985	0.632819	0.963978	1	0.6	2.55039	5.85794	0.235257	0.993629	1
o__Clostridiales, 269091	2.6	0.855978	1.80999	0.481594	0.919892	1	7	2.47151	5.54623	0.0346867	0.76967	1	7	1.61553	3.06424	0.136958	0.993871	1	5.8	2.21303	4.63649	0.0603122	0.724271	1	5.8	1.35705	2.56162	0.215118	0.918974	1	7	-0.258475	-1.19621	0.804325	0.993629	1
f__Enterobacteriaceae, 588216	0.8	-0.919803	-1.89186	0.484402	0.923977	1	0.8	-2.80176	-6.9729	0.171124	0.76967	1	0.4	-1.88196	-3.68574	0.375112	0.993871	1	0.8	-2.54423	-5.83298	0.192348	0.739844	1	0.4	-1.62443	-3.0832	0.423544	0.918974	1	0	0.257525	1.19543	0.920036	0.993629	1
g__Helicobacter, 1141335	420.4	-0.4854	-1.39997	0.485319	0.924316	1	420.4	-0.948837	-1.93032	0.172876	0.76967	1	325.2	-0.463437	-1.37882	0.505649	0.993871	1	420.4	-1.19914	-2.29602	0.0851451	0.739844	1	325.2	-0.713738	-1.64005	0.305582	0.918974	1	221.8	-0.250301	-1.18946	0.719561	0.993629	1
o__RF39, M70574:46:000000000-J6F43:1:1110:17449:14653 1:N:0:GTGCCATA+TAAGATCC/M70574:46:000000000-J6F43:1:1110:17449:14653 2:N:0:GTGCCATA+TAAGATCC	2	1.02463	2.03444	0.485918	0.924316	1	1.6	1.0475	2.06695	0.478517	0.89909	1	2	0.0228703	1.01598	0.986671	0.995727	1	0.8	-0.531084	-1.44501	0.747775	0.90078	1	2	-1.55572	-2.93979	0.316968	0.918974	1	1.6	-1.57859	-2.98677	0.312148	0.993629	1
o__Clostridiales, 322839	3	-0.919365	-1.89128	0.487731	0.925017	1	3	-0.293745	-1.22582	0.821356	0.946826	1	2	0.625619	1.54287	0.638713	0.993871	1	3	-2.6066	-6.09069	0.0917863	0.739844	1	1.8	-1.68724	-3.2204	0.283342	0.918974	1	2	-2.31286	-4.96867	0.136296	0.993629	1
g__Oscillospira, 309290	2.8	-0.905025	-1.87258	0.489538	0.925017	1	2.8	-1.03423	-2.04802	0.437114	0.848266	1	1.8	-0.129204	-1.09369	0.924598	0.993871	1	2.8	-1.24126	-2.36405	0.360737	0.794631	1	1.8	-0.336236	-1.26246	0.809088	0.963978	1	1.4	-0.207032	-1.15431	0.883407	0.993629	1
o__Clostridiales, 271602	6.4	0.998271	1.9976	0.489356	0.925017	1	4.2	0.428505	1.34584	0.769372	0.946826	1	6.4	-0.569766	-1.48428	0.689061	0.993871	1	4.4	0.896859	1.86201	0.53675	0.90078	1	6.4	-0.101412	-1.07282	0.942827	0.983225	1	4.4	0.468354	1.38353	0.74361	0.993629	1
f__Ruminococcaceae, 196746	1	1.01013	2.01409	0.487623	0.925017	1	0.4	-1.86818	-3.65071	0.402139	0.80739	1	1	-2.8783	-7.35285	0.172798	0.993871	1	0.4	-1.60438	-3.04065	0.453501	0.813479	1	1	-2.61451	-6.12413	0.1948	0.918974	1	0	0.263799	1.20064	0.920126	0.993629	1
f__S24-7, 190573	38.6	-0.52315	-1.43709	0.489636	0.925017	1	38.6	-0.385063	-1.30592	0.611136	0.946826	1	29	0.138087	1.10044	0.855587	0.993871	1	38.6	-0.711544	-1.63756	0.34959	0.794631	1	27.8	-0.188394	-1.13949	0.804752	0.963978	1	29	-0.326481	-1.25395	0.668409	0.993629	1
o__Clostridiales, 183838	30	-0.787791	-1.72643	0.49124	0.926779	1	30	-1.13145	-2.19078	0.324847	0.76967	1	17	-0.343655	-1.26897	0.765573	0.993871	1	30	-1.37788	-2.59886	0.232389	0.739844	1	17	-0.590085	-1.50534	0.610074	0.963978	1	12.2	-0.24643	-1.18627	0.832017	0.993629	1
f__Lachnospiraceae, 213896	0.8	-0.919391	-1.89132	0.492534	0.927953	1	0.8	-0.759917	-1.69339	0.570864	0.946826	1	0.4	0.159475	1.11688	0.912541	0.993871	1	0.8	-2.54382	-5.83132	0.196207	0.739844	1	0.4	-1.62443	-3.0832	0.427135	0.918974	1	0.4	-1.78391	-3.44357	0.383341	0.993629	1
o__Clostridiales, 322564	1.6	1.054	2.07628	0.494065	0.92957	1	0.4	-2.35804	-5.12673	0.308384	0.76967	1	1.6	-3.41204	-10.6445	0.125859	0.993871	1	0.6	0.239727	1.18077	0.88358	0.937057	1	1.6	-0.814275	-1.75841	0.590548	0.963978	1	0.6	2.59777	6.05349	0.257974	0.993629	1
o__Clostridiales, 211234	1.2	0.992349	1.98942	0.495282	0.930591	1	0.4	-0.199104	-1.14799	0.90227	0.956281	1	1.2	-1.19145	-2.28383	0.422421	0.993871	1	0.4	0.000568196	1.00039	0.999717	0.999717	1	1.2	-0.99178	-1.98864	0.49816	0.963978	1	0.4	0.199672	1.14844	0.902472	0.993629	1
f__S24-7, 262148	6.6	0.660049	1.58014	0.500443	0.93901	1	4	-0.48701	-1.40154	0.63471	0.946826	1	6.6	-1.14706	-2.21462	0.250421	0.993871	1	4.2	0.158055	1.11578	0.87461	0.936882	1	6.6	-0.501993	-1.41617	0.606241	0.963978	1	4.2	0.645065	1.56381	0.526955	0.993629	1
f__Lachnospiraceae, 262766	1.2	-0.916603	-1.88767	0.5023	0.93994	1	1.2	-0.836671	-1.78592	0.543555	0.946826	1	0.6	0.0799317	1.05697	0.955959	0.993871	1	1.2	-1.33596	-2.52443	0.364756	0.794631	1	0.6	-0.419354	-1.33733	0.785336	0.963978	1	0.6	-0.499285	-1.41351	0.74728	0.993629	1
f__Erysipelotrichaceae, 180869	1.2	-0.989927	-1.98608	0.501624	0.93994	1	1.8	0.506165	1.42027	0.706095	0.946826	1	1.8	1.49609	2.82078	0.296211	0.993871	1	1.2	-0.315706	-1.24462	0.824114	0.911639	1	0.8	0.67422	1.59573	0.65433	0.963978	1	1.8	-0.821871	-1.7677	0.550853	0.993629	1
o__Clostridiales, 1105958	0.8	-0.941426	-1.92043	0.503042	0.940055	1	0.8	0.0261287	1.01828	0.983723	0.989455	1	0.8	0.967554	1.95552	0.488878	0.993871	1	0.8	-2.57256	-5.94864	0.201654	0.739844	1	0.4	-1.63113	-3.09756	0.435404	0.918974	1	0.8	-2.59869	-6.05736	0.195917	0.993629	1
o__Clostridiales, 329741	7.2	0.626829	1.54417	0.506884	0.945955	1	4	-0.267102	-1.20339	0.784789	0.946826	1	7.2	-0.893931	-1.85823	0.347695	0.993871	1	4	-0.307276	-1.23737	0.755011	0.90078	1	7.2	-0.934105	-1.91071	0.329914	0.918974	1	3.4	-0.0401739	-1.02824	0.967694	0.997082	1
f__Ruminococcaceae, 1111350	1.6	-0.830634	-1.77847	0.508165	0.947066	1	3.2	1.12959	2.18796	0.315216	0.76967	1	3.2	1.96022	3.89121	0.0992075	0.993871	1	3.2	1.18038	2.26637	0.294882	0.752776	1	3.2	2.01102	4.03066	0.0913145	0.918974	1	3.2	0.0507951	1.03584	0.961506	0.997082	1
g__Lactobacillus, 509149	0.2	1.69475	3.23722	0.514544	0.95157	1	2.4	4.64182	24.9647	0.0521958	0.76967	1	2.4	2.94706	7.71177	0.0628088	0.993871	1	6.8	6.51448	91.4228	0.00585491	0.188038	1	6.8	4.81973	28.2412	0.00178739	0.918974	1	6.8	1.87267	3.66209	0.105208	0.993629	1
s__reuteri, 356144	0.2	1.63856	3.11355	0.515197	0.95157	1	2	4.48518	22.3961	0.0507541	0.76967	1	2	2.84662	7.19311	0.0505143	0.993871	1	3.6	5.39118	41.9669	0.017911	0.419239	1	3.6	3.75262	13.4788	0.00849717	0.918974	1	3.6	0.906003	1.87385	0.356322	0.993629	1
f__S24-7, 331720	182.2	-0.515904	-1.42989	0.51539	0.95157	1	182.2	-0.631875	-1.54958	0.425873	0.835076	1	127.2	-0.115971	-1.0837	0.88385	0.993871	1	182.2	-0.436735	-1.35354	0.582011	0.90078	1	127.2	0.0791688	1.05641	0.920546	0.973994	1	108.8	0.19514	1.14484	0.805889	0.993629	1
o__Clostridiales, 267549	52.4	-0.661926	-1.58219	0.512633	0.95157	1	52.4	-0.843856	-1.79484	0.404533	0.80848	1	33.4	-0.181929	-1.1344	0.857548	0.993871	1	52.4	-1.6185	-3.07056	0.111873	0.739844	1	33.4	-0.956576	-1.9407	0.347971	0.918974	1	26.4	-0.774646	-1.71077	0.447848	0.993629	1
f__Rikenellaceae, 264240	9	-0.817549	-1.76241	0.515405	0.95157	1	8.8	-0.763305	-1.69737	0.544171	0.946826	1	9	0.0542444	1.03832	0.965804	0.993871	1	9	-0.428058	-1.34542	0.733075	0.90078	1	9	0.389491	1.30993	0.757594	0.963978	1	9	0.335247	1.26159	0.790761	0.993629	1
g__Coprococcus, 199600	12.2	-0.542712	-1.45671	0.515022	0.95157	1	12.2	-0.256892	-1.1949	0.757238	0.946826	1	9.2	0.285821	1.2191	0.732478	0.993871	1	12.2	-0.754429	-1.68696	0.372008	0.794631	1	8.6	-0.211716	-1.15807	0.803319	0.963978	1	9.2	-0.497537	-1.4118	0.557203	0.993629	1
g__Oscillospira, 167034	3.4	-0.632645	-1.5504	0.513512	0.95157	1	3.4	-0.857814	-1.81229	0.388393	0.797157	1	2.4	-0.225169	-1.16891	0.824346	0.993871	1	3.4	-2.15392	-4.45034	0.0627917	0.738998	1	2.4	-1.52127	-2.87044	0.19534	0.918974	1	1.8	-1.2961	-2.45565	0.278705	0.993629	1
f__S24-7, M70574:46:000000000-J6F43:1:2102:6794:12330 1:N:0:ACCTGGAT+TTCTAGAC/M70574:46:000000000-J6F43:1:2102:6794:12330 2:N:0:ACCTGGAT+TTCTAGAC	162.6	0.496058	1.41035	0.516442	0.952212	1	117.2	0.194236	1.14412	0.79961	0.946826	1	162.6	-0.301822	-1.2327	0.692779	0.993871	1	123.2	0.382113	1.30325	0.617452	0.90078	1	162.6	-0.113944	-1.08218	0.881415	0.963978	1	123.2	0.187877	1.13909	0.805862	0.993629	1
f__S24-7, 4481506	6206.2	0.326429	1.25391	0.518739	0.955171	1	4808.4	0.12274	1.0888	0.808296	0.946826	1	6206.2	-0.203689	-1.15164	0.68719	0.993871	1	4997.2	0.32621	1.25372	0.519032	0.883826	1	6206.2	-0.000219195	-1.00015	0.999654	0.999654	1	4997.2	0.20347	1.15146	0.687518	0.993629	1
f__Ruminococcaceae, 188225	5.8	-0.90985	-1.87885	0.520507	0.95715	1	6.8	-0.341931	-1.26745	0.808081	0.946826	1	6.8	0.56792	1.48238	0.689079	0.993871	1	6.2	-0.312885	-1.24219	0.824293	0.911639	1	6.2	0.596966	1.51253	0.674399	0.963978	1	6.8	0.0290461	1.02034	0.983596	0.99803	1
o__Clostridiales, 2883968	5.2	0.707653	1.63315	0.52151	0.95772	1	2.4	-0.0916622	-1.0656	0.935967	0.97244	1	5.2	-0.799316	-1.74028	0.469116	0.993871	1	2.4	-0.869699	-1.82728	0.469163	0.828534	1	5.2	-1.57735	-2.98422	0.176358	0.918974	1	2.4	-0.778037	-1.7148	0.517339	0.993629	1
f__Ruminococcaceae, 550807	0.8	0.923409	1.89659	0.526241	0.958054	1	0.4	-1.89718	-3.72484	0.394331	0.798491	1	0.8	-2.82059	-7.0645	0.182675	0.993871	1	0.4	-1.63287	-3.10128	0.444911	0.807677	1	0.8	-2.55627	-5.88187	0.206132	0.918974	1	0	0.264313	1.20106	0.920001	0.993629	1
f__Clostridiaceae, 337511	9.6	0.600287	1.51602	0.522815	0.958054	1	9.6	0.596594	1.51214	0.526682	0.945836	1	9.6	-0.00369353	-1.00256	0.996802	0.999529	1	7.4	0.548827	1.4629	0.561664	0.90078	1	9.6	-0.0514599	-1.03631	0.955634	0.987956	1	9.6	-0.0477663	-1.03366	0.958949	0.997082	1
g__Oscillospira, 335330	3	-0.733761	-1.66297	0.523174	0.958054	1	3	-0.160267	-1.11749	0.886845	0.948637	1	2.8	0.573493	1.48812	0.618738	0.993871	1	3	-0.0140792	-1.00981	0.990009	0.995334	1	3	0.719681	1.64682	0.531623	0.963978	1	3	0.146188	1.10664	0.896843	0.993629	1
f__S24-7, 266860	11.2	0.483303	1.39794	0.526548	0.958054	1	10.6	0.575108	1.48979	0.451795	0.862973	1	11.2	0.091805	1.0657	0.902218	0.993871	1	7.2	-0.206452	-1.15385	0.792951	0.90078	1	11.2	-0.689755	-1.61301	0.370321	0.918974	1	10.6	-0.78156	-1.71899	0.310781	0.993629	1
f__Peptococcaceae, 263705	0.8	-0.903724	-1.87089	0.526293	0.958054	1	0.8	-2.81191	-7.02216	0.185383	0.76967	1	0.4	-1.90819	-3.75338	0.384037	0.993871	1	0.8	-2.54829	-5.84941	0.209149	0.739844	1	0.4	-1.64457	-3.12654	0.433775	0.918974	1	0	0.263623	1.20049	0.919992	0.993629	1
o__Clostridiales, M70574:46:000000000-J6F43:1:1102:4407:5726 1:N:0:GTGCCATA+CCGATCTT/M70574:46:000000000-J6F43:1:1102:4407:5726 2:N:0:GTGCCATA+CCGATCTT	2	0.875928	1.83519	0.525169	0.958054	1	0.6	-0.983575	-1.97736	0.538164	0.946826	1	2	-1.8595	-3.62883	0.220991	0.993871	1	0.6	-2.63967	-6.2319	0.215896	0.739844	1	2	-3.5156	-11.4367	0.0902047	0.918974	1	0.4	-1.6561	-3.15163	0.457014	0.993629	1
f__Rikenellaceae, M70574:46:000000000-J6F43:1:1115:16383:11765 1:N:0:ACCTGGAT+CACTAATG/M70574:46:000000000-J6F43:1:1115:16383:11765 2:N:0:ACCTGGAT+CACTAATG	4.2	0.6798	1.60192	0.526109	0.958054	1	3	0.0905372	1.06477	0.934403	0.97244	1	4.2	-0.589263	-1.50448	0.579444	0.993871	1	2.4	-0.165692	-1.1217	0.88227	0.937057	1	4.2	-0.845492	-1.79688	0.434882	0.918974	1	3	-0.256229	-1.19435	0.817471	0.993629	1
f__S24-7, 335881	2.8	-0.779885	-1.71699	0.529476	0.962113	1	2.8	-1.0402	-2.05652	0.412989	0.817103	1	1.6	-0.26032	-1.19774	0.841002	0.993871	1	2.8	-0.341788	-1.26733	0.781068	0.90078	1	1.6	0.438097	1.35482	0.727578	0.963978	1	1.6	0.698417	1.62272	0.587534	0.993629	1
o__Clostridiales, 353593	68.2	-0.491152	-1.40557	0.533617	0.967693	1	68.2	-0.745636	-1.67671	0.345745	0.76967	1	49.4	-0.254484	-1.19291	0.747825	0.993871	1	68.2	-0.942817	-1.92228	0.234221	0.739844	1	49.4	-0.451664	-1.36762	0.569117	0.963978	1	38.6	-0.197181	-1.14646	0.804136	0.993629	1
f__S24-7, 191994	0.8	0.930538	1.90599	0.533948	0.967693	1	1	1.37022	2.58511	0.35183	0.76967	1	1	0.439685	1.35631	0.73468	0.993871	1	0.4	-1.64161	-3.12014	0.448602	0.809829	1	0.8	-2.57215	-5.94695	0.210028	0.918974	1	1	-3.01183	-8.06589	0.138733	0.993629	1
f__Ruminococcaceae, 325633	7	0.675029	1.59663	0.535818	0.969486	1	7	0.814268	1.75841	0.455299	0.867265	1	7	0.139239	1.10132	0.895711	0.993871	1	3.8	-0.0800934	-1.05709	0.943069	0.969032	1	7	-0.755122	-1.68777	0.490031	0.963978	1	7	-0.894361	-1.85879	0.413778	0.993629	1
o__Clostridiales, 277442	43	-0.475973	-1.39086	0.536341	0.969486	1	43	-0.698173	-1.62245	0.366011	0.772654	1	34.2	-0.2222	-1.16651	0.773884	0.993871	1	43	-0.939626	-1.91803	0.225644	0.739844	1	34.2	-0.463653	-1.37903	0.550464	0.963978	1	26.8	-0.241453	-1.18218	0.756637	0.993629	1
s__distasonis, 578016	112.6	0.726506	1.65463	0.539883	0.97135	1	103.2	0.633438	1.55126	0.593132	0.946826	1	112.6	-0.0930682	-1.06664	0.937325	0.993871	1	85	0.715369	1.6419	0.546255	0.90078	1	112.6	-0.0111375	-1.00775	0.992492	0.997549	1	103.2	0.0819307	1.05843	0.944832	0.997082	1
f__Lachnospiraceae, 411254	0.2	-1.33518	-2.52307	0.539685	0.97135	1	0.4	0.841827	1.79232	0.583193	0.946826	1	0.4	2.17701	4.52215	0.282992	0.993871	1	0.2	-0.942079	-1.92129	0.654236	0.90078	1	0	0.393102	1.31321	0.874379	0.963978	1	0.4	-1.78391	-3.44357	0.359889	0.993629	1
s__gnavus, 262825	0.8	-0.927976	-1.90261	0.540186	0.97135	1	1.4	0.784984	1.72307	0.553424	0.946826	1	1.4	1.71296	3.27833	0.234335	0.993871	1	2	1.28791	2.44173	0.321216	0.786524	1	2	2.21588	4.64566	0.117681	0.918974	1	2	0.502922	1.41708	0.677781	0.993629	1
g__Oscillospira, 186194	14.4	-0.693905	-1.61766	0.53881	0.97135	1	14.4	-1.65828	-3.15639	0.151634	0.76967	1	8.8	-0.964372	-1.95121	0.406723	0.993871	1	14.4	-1.68765	-3.22132	0.146265	0.739844	1	8.8	-0.993746	-1.99135	0.394617	0.918974	1	4.2	-0.0293738	-1.02057	0.980374	0.99803	1
f__Lachnospiraceae, 266247	3.6	-0.584146	-1.49915	0.542976	0.974176	1	3.6	0.0698543	1.04961	0.940472	0.97244	1	3.4	0.654	1.57352	0.492787	0.993871	1	3.6	-2.61786	-6.13839	0.0347747	0.564986	1	2.6	-2.03371	-4.09458	0.104802	0.918974	1	3.4	-2.68771	-6.44292	0.0295212	0.993629	1
o__Clostridiales, 195343	1.2	0.821463	1.7672	0.543874	0.974176	1	0.6	-0.340276	-1.266	0.822517	0.946826	1	1.2	-1.16174	-2.23727	0.408871	0.993871	1	1.2	0.983224	1.97688	0.470119	0.829163	1	1.2	0.161761	1.11865	0.895969	0.971539	1	1.2	1.3235	2.50273	0.349358	0.993629	1
o__Clostridiales, 194656	8.6	-0.587986	-1.50315	0.543223	0.974176	1	8.6	-0.851987	-1.80498	0.384883	0.792625	1	5.4	-0.264001	-1.2008	0.78936	0.993871	1	8.6	-0.792545	-1.73213	0.419741	0.79601	1	5.4	-0.204559	-1.15233	0.836299	0.963978	1	4.2	0.059442	1.04206	0.952742	0.997082	1
o__Clostridiales, 621700	3	-0.710001	-1.63581	0.545142	0.975183	1	3	-2.08976	-4.25678	0.108628	0.76967	1	2.6	-1.37976	-2.60225	0.29585	0.993871	1	3	-0.339813	-1.26559	0.771163	0.90078	1	2.6	0.370188	1.29252	0.755266	0.963978	1	2.6	1.74995	3.36347	0.183375	0.993629	1
f__S24-7, 196672	11	0.464915	1.38024	0.545868	0.975219	1	7.4	-0.534696	-1.44864	0.504119	0.930734	1	11	-0.999611	-1.99946	0.202545	0.993871	1	7.8	0.271514	1.20707	0.727522	0.90078	1	11	-0.193401	-1.14346	0.799856	0.963978	1	7.8	0.80621	1.74861	0.309762	0.993629	1
s__gnavus, 262869	2	0.892934	1.85695	0.54888	0.979332	1	1.6	0.812175	1.75586	0.588905	0.946826	1	2	-0.0807594	-1.05757	0.954483	0.993871	1	1	0.120955	1.08745	0.938367	0.967801	1	2	-0.771979	-1.70761	0.601943	0.963978	1	1.6	-0.69122	-1.61465	0.643454	0.993629	1
f__Ruminococcaceae, 510233	68.6	-0.622794	-1.53985	0.550835	0.981553	1	68.6	-0.682672	-1.60511	0.513501	0.935866	1	49.2	-0.0598783	-1.04238	0.954339	0.993871	1	68.6	-1.04595	-2.06472	0.31776	0.78083	1	49.2	-0.423156	-1.34086	0.686341	0.963978	1	42.2	-0.363278	-1.28635	0.729013	0.993629	1
f__Desulfovibrionaceae, 1108599	59.6	-0.585444	-1.5005	0.575228	0.982904	1	59.6	-1.01103	-2.01535	0.334461	0.76967	1	39.2	-0.425585	-1.34312	0.684831	0.993871	1	59.6	-1.20854	-2.31103	0.249532	0.739844	1	39.2	-0.623094	-1.54017	0.553116	0.963978	1	25.2	-0.197509	-1.14672	0.851261	0.993629	1
o__Clostridiales, 976470	0	0.302746	1.23349	0.916924	0.982904	1	0	0.436699	1.3535	0.880902	0.946826	1	0	0.133953	1.0973	0.960345	0.993871	1	1.4	3.88181	14.7415	0.0998438	0.739844	1	1.4	3.57906	11.951	0.0853248	0.918974	1	1.4	3.44511	10.8913	0.100451	0.993629	1
o__Clostridiales, 827689	1.8	-0.645574	-1.56436	0.618276	0.982904	1	2.2	0.292954	1.22515	0.813171	0.946826	1	2.2	0.938528	1.91657	0.460925	0.993871	1	1.8	-0.140478	-1.10227	0.912263	0.952077	1	1.6	0.505095	1.41922	0.699238	0.963978	1	2.2	-0.433432	-1.35044	0.729173	0.993629	1
f__Lachnospiraceae, 826382	2	-0.570247	-1.48478	0.65	0.982904	1	2	-0.280883	-1.21494	0.82188	0.946826	1	1.6	0.289363	1.2221	0.819596	0.993871	1	2	-1.56765	-2.96421	0.260179	0.739844	1	1.6	-0.997402	-1.9964	0.479714	0.955967	1	1.6	-1.28677	-2.4398	0.359123	0.993629	1
g__Coprococcus, 826302	6	-0.269961	-1.20578	0.782813	0.982904	1	6.2	0.159393	1.11682	0.869742	0.946826	1	6.2	0.429354	1.34663	0.65877	0.993871	1	6	-1.02376	-2.03321	0.316277	0.779961	1	5.4	-0.753799	-1.68623	0.460694	0.940742	1	6.2	-1.18315	-2.27073	0.243642	0.993629	1
o__Clostridiales, 799034	1.6	0.147078	1.10732	0.916674	0.982904	1	1.2	-1.33715	-2.52652	0.403804	0.808193	1	1.6	-1.48423	-2.79768	0.346089	0.993871	1	2.2	1.01092	2.01519	0.461055	0.821569	1	2.2	0.863841	1.81988	0.519317	0.963978	1	2.2	2.34807	5.09143	0.128499	0.993629	1
o__Clostridiales, 769075	1.2	0.774963	1.71115	0.559618	0.982904	1	0.6	-0.4074	-1.32629	0.786631	0.946826	1	1.2	-1.18236	-2.26948	0.397349	0.993871	1	0.6	-2.1306	-4.37899	0.304486	0.763149	1	1.2	-2.90556	-7.49309	0.145854	0.918974	1	0.4	-1.7232	-3.30167	0.4162	0.993629	1
f__Rikenellaceae, 575041	1.6	-0.208414	-1.15542	0.878492	0.982904	1	2.4	0.519246	1.43321	0.696585	0.946826	1	2.4	0.72766	1.65595	0.5841	0.993871	1	1.2	-0.512319	-1.42634	0.715946	0.90078	1	1.6	-0.303905	-1.23448	0.828838	0.963978	1	2.4	-1.03156	-2.04424	0.453142	0.993629	1
o__Clostridiales, 569818	0	0.302447	1.23323	0.915464	0.982904	1	0	0.436888	1.35368	0.878663	0.946826	1	0	0.134441	1.09767	0.959354	0.993871	1	0.8	3.38719	10.4628	0.144582	0.739844	1	0.8	3.08475	8.48401	0.130399	0.918974	1	0.8	2.95031	7.72913	0.151463	0.993629	1
s__distasonis, 564140	0	0.301765	1.23265	0.912655	0.982904	1	0	0.437342	1.35411	0.874267	0.946826	1	0	0.135578	1.09853	0.957326	0.993871	1	0.4	2.5999	6.06243	0.252299	0.739844	1	0.4	2.29813	4.91821	0.246891	0.918974	1	0.4	2.16255	4.47707	0.280122	0.993629	1
g__Bacteroides, 556126	121.4	-0.170457	-1.12541	0.891813	0.982904	1	117.2	-0.158834	-1.11638	0.899163	0.954454	1	121.4	0.0116225	1.00809	0.992601	0.999402	1	81.8	-0.305488	-1.23584	0.807506	0.90078	1	121.4	-0.135031	-1.09812	0.914227	0.971539	1	117.2	-0.146654	-1.107	0.90689	0.993629	1
g__Lactobacillus, 549756	0	0.301765	1.23265	0.912655	0.982904	1	0	0.437342	1.35411	0.874267	0.946826	1	0	0.135578	1.09853	0.957326	0.993871	1	0.4	2.59991	6.06248	0.252296	0.739844	1	0.4	2.29814	4.91825	0.246888	0.918974	1	0.4	2.16257	4.47711	0.280119	0.993629	1
s__nasimurium, 538247	0	0.301765	1.23265	0.912655	0.982904	1	0	0.437342	1.35411	0.874267	0.946826	1	0	0.135578	1.09853	0.957326	0.993871	1	0.4	2.59991	6.06248	0.252296	0.739844	1	0.4	2.29814	4.91825	0.246888	0.918974	1	0.4	2.16257	4.47711	0.280119	0.993629	1
s__vaginalis, 536754	0	0.301765	1.23265	0.912655	0.982904	1	0	0.437342	1.35411	0.874267	0.946826	1	0	0.135578	1.09853	0.957326	0.993871	1	0.4	2.60017	6.06358	0.252242	0.739844	1	0.4	2.29841	4.91914	0.246826	0.918974	1	0.4	2.16283	4.47792	0.280052	0.993629	1
o__Clostridiales, 522433	0	0.301884	1.23275	0.914225	0.982904	1	0.6	2.92111	7.57428	0.202816	0.76967	1	0.6	2.61922	6.1442	0.192306	0.993871	1	0	0.695659	1.61962	0.799997	0.90078	1	0	0.393775	1.31383	0.87548	0.963978	1	0.6	-2.22545	-4.67657	0.248571	0.993629	1
s__parvula, 518743	0	0.301765	1.23265	0.912655	0.982904	1	0.4	2.47868	5.57388	0.27626	0.76967	1	0.4	2.17692	4.52186	0.274229	0.993871	1	0	0.694867	1.61874	0.796381	0.90078	1	0	0.393102	1.31321	0.872847	0.963978	1	0.4	-1.78381	-3.44335	0.350305	0.993629	1
f__S24-7, 463233	144.4	0.440995	1.35754	0.558916	0.982904	1	112	0.261935	1.19909	0.728662	0.946826	1	144.4	-0.179059	-1.13215	0.812222	0.993871	1	126.4	0.599372	1.51506	0.427092	0.79601	1	144.4	0.158378	1.11603	0.833496	0.963978	1	126.4	0.337437	1.26351	0.654454	0.993629	1
o__Clostridiales, 458550	0	0.301765	1.23265	0.912655	0.982904	1	0.4	2.47868	5.57388	0.27626	0.76967	1	0.4	2.17692	4.52186	0.274229	0.993871	1	0	0.694867	1.61874	0.796381	0.90078	1	0	0.393102	1.31321	0.872847	0.963978	1	0.4	-1.78381	-3.44335	0.350305	0.993629	1
g__Oscillospira, 452014	2	-0.239515	-1.1806	0.850039	0.982904	1	2	-2.04548	-4.1281	0.169641	0.76967	1	1.8	-1.80596	-3.49663	0.225212	0.993871	1	2	-1.55865	-2.94579	0.273015	0.741232	1	1.8	-1.31914	-2.49517	0.353457	0.918974	1	0.6	0.486826	1.40136	0.76423	0.993629	1
f__Ruminococcaceae, 441494	6.4	-0.455478	-1.37124	0.633225	0.982904	1	6.4	-0.91869	-1.8904	0.34737	0.76967	1	5.8	-0.463211	-1.37861	0.637463	0.993871	1	6.4	-0.494448	-1.40878	0.608251	0.90078	1	5.8	-0.0389699	-1.02738	0.967954	0.99127	1	4.6	0.424242	1.34187	0.669149	0.993629	1
g__Oscillospira, 439880	0	0.301884	1.23275	0.914223	0.982904	1	0.6	2.92111	7.57428	0.202795	0.76967	1	0.6	2.61922	6.1442	0.192279	0.993871	1	0	0.695659	1.61962	0.799991	0.90078	1	0	0.393775	1.31383	0.875475	0.963978	1	0.6	-2.22545	-4.67657	0.24854	0.993629	1
g__AF12, 418501	69.6	-0.308748	-1.23863	0.711727	0.982904	1	69.6	-0.675341	-1.59697	0.419899	0.827697	1	68.2	-0.366593	-1.2893	0.661521	0.993871	1	69.6	-0.767533	-1.70236	0.359819	0.794631	1	68.2	-0.458784	-1.37438	0.584157	0.963978	1	47.4	-0.0921913	-1.06599	0.912607	0.993629	1
f__S24-7, 416078	258	-0.30623	-1.23647	0.665717	0.982904	1	258	-0.311417	-1.24093	0.660476	0.946826	1	213.8	-0.00518737	-1.0036	0.994162	0.999402	1	258	-0.43449	-1.35143	0.540128	0.90078	1	213.8	-0.12826	-1.09298	0.856493	0.963978	1	189.4	-0.123073	-1.08905	0.862267	0.993629	1
f__Ruminococcaceae, 398138	0.8	-0.446577	-1.3628	0.739138	0.982904	1	0.8	-2.77273	-6.834	0.189659	0.76967	1	0.6	-2.32615	-5.01467	0.275974	0.993871	1	0.8	-0.610665	-1.52696	0.665171	0.90078	1	0.6	-0.164088	-1.12046	0.909441	0.971539	1	0.4	2.16207	4.47555	0.321272	0.993629	1
o__Clostridiales, 390820	4.2	0.53634	1.45029	0.630179	0.982904	1	2.6	-0.301612	-1.23252	0.794514	0.946826	1	4.2	-0.837951	-1.78751	0.456878	0.993871	1	2.6	-0.974968	-1.9656	0.423151	0.79601	1	4.2	-1.51131	-2.85068	0.202971	0.918974	1	1.8	-0.673356	-1.59478	0.583625	0.993629	1
f__S24-7, 390633	3.6	0.646671	1.56555	0.564068	0.982904	1	2.4	-0.224842	-1.16865	0.847577	0.946826	1	3.6	-0.871513	-1.82958	0.440645	0.993871	1	3.2	0.808016	1.7508	0.472489	0.83228	1	3.6	0.161345	1.11833	0.881623	0.963978	1	3.2	1.03286	2.04607	0.362293	0.993629	1
o__YS2, 381666	57.2	-0.727727	-1.65603	0.592589	0.982904	1	55.4	-0.933644	-1.91009	0.49269	0.919112	1	57.2	-0.205917	-1.15342	0.879807	0.993871	1	55.4	-1.44833	-2.72891	0.28803	0.749455	1	57.2	-0.720598	-1.64787	0.597299	0.963978	1	44.8	-0.514682	-1.42868	0.706118	0.993629	1
f__S24-7, 380534	2.2	-0.128633	-1.09326	0.918728	0.982904	1	3.6	0.734908	1.66429	0.549729	0.946826	1	3.6	0.863541	1.8195	0.479646	0.993871	1	5.4	1.62569	3.08589	0.177944	0.739844	1	5.4	1.75432	3.37367	0.14366	0.918974	1	5.4	0.89078	1.85418	0.444878	0.993629	1
o__Clostridiales, 374503	16.6	-0.347895	-1.2727	0.71708	0.982904	1	16.6	-1.41307	-2.66302	0.150026	0.76967	1	12.8	-1.06517	-2.09242	0.278255	0.993871	1	16.6	-0.553446	-1.46759	0.56688	0.90078	1	12.8	-0.20555	-1.15313	0.8317	0.963978	1	10.2	0.85962	1.81456	0.384579	0.993629	1
f__S24-7, 372368	0	0.302039	1.23289	0.916059	0.982904	1	0.6	2.89775	7.45261	0.221755	0.76967	1	0.6	2.59571	6.04485	0.215485	0.993871	1	1	3.63861	12.4546	0.117696	0.739844	1	1	3.33657	10.102	0.102534	0.918974	1	1	0.74086	1.67117	0.556652	0.993629	1
s__prausnitzii, 361722	0.4	-0.174828	-1.12883	0.907687	0.982904	1	0.4	-2.11602	-4.33496	0.332371	0.76967	1	0.4	-1.94119	-3.84023	0.373376	0.993871	1	0.4	0.0472791	1.03331	0.975063	0.987216	1	0.4	0.222107	1.16644	0.883007	0.963978	1	0.4	2.1633	4.47938	0.321926	0.993629	1
s__muciniphila, 359376	0	0.302419	1.23321	0.916068	0.982904	1	0.8	3.18124	9.07084	0.17663	0.76967	1	0.8	2.87882	7.35547	0.165531	0.993871	1	0.4	2.60016	6.06356	0.281459	0.746392	1	0.4	2.29775	4.91689	0.283755	0.918974	1	0.8	-0.581072	-1.49596	0.673632	0.993629	1
f__Lachnospiraceae, 357312	0	0.301765	1.23265	0.912655	0.982904	1	0.4	2.47877	5.57423	0.27624	0.76967	1	0.4	2.17701	4.52215	0.274206	0.993871	1	0	0.694867	1.61874	0.796381	0.90078	1	0	0.393102	1.31321	0.872847	0.963978	1	0.4	-1.78391	-3.44357	0.350277	0.993629	1
g__Oscillospira, 356055	0	0.301765	1.23265	0.912655	0.982904	1	0	0.437342	1.35411	0.874267	0.946826	1	0	0.135578	1.09853	0.957326	0.993871	1	0.4	2.5999	6.06243	0.252299	0.739844	1	0.4	2.29813	4.91821	0.246891	0.918974	1	0.4	2.16255	4.47707	0.280122	0.993629	1
f__Ruminococcaceae, 353982	34.4	-0.234394	-1.17641	0.778526	0.982904	1	34.4	-0.433912	-1.35089	0.603614	0.946826	1	34.4	-0.199518	-1.14831	0.811241	0.993871	1	34.4	-0.361809	-1.28504	0.665184	0.90078	1	34.4	-0.127415	-1.09233	0.878826	0.963978	1	28.4	0.0721033	1.05125	0.931434	0.993629	1
g__Bacteroides, 353782	6.4	0.984043	1.978	0.56205	0.982904	1	4.6	0.565773	1.48018	0.740564	0.946826	1	6.4	-0.41827	-1.33632	0.802919	0.993871	1	2	-0.183673	-1.13577	0.915785	0.95377	1	6.4	-1.16772	-2.24656	0.493346	0.963978	1	4.6	-0.749446	-1.68115	0.662333	0.993629	1
g__Bacteroides, 352825	27.8	0.415645	1.3339	0.738124	0.982904	1	31.8	0.672211	1.59351	0.588548	0.946826	1	31.8	0.256566	1.19463	0.835812	0.993871	1	18.2	0.254975	1.19331	0.837834	0.920485	1	27.8	-0.16067	-1.11781	0.896994	0.971539	1	31.8	-0.417236	-1.33537	0.736626	0.993629	1
o__Clostridiales, 352612	7.8	-0.219573	-1.16439	0.817556	0.982904	1	7.8	-0.200324	-1.14896	0.833869	0.946826	1	7.6	0.0192491	1.01343	0.983902	0.995727	1	7.8	-0.240855	-1.18169	0.801704	0.90078	1	7.6	-0.0212818	-1.01486	0.982276	0.996175	1	7	-0.0405309	-1.02849	0.966366	0.997082	1
s__gnavus, 352445	0	0.30215	1.23298	0.915088	0.982904	1	0.6	2.9786	7.8822	0.200466	0.76967	1	0.6	2.67645	6.3928	0.190733	0.993871	1	0	0.697425	1.62161	0.801721	0.90078	1	0	0.395275	1.31519	0.876642	0.963978	1	0.6	-2.28117	-4.86073	0.246036	0.993629	1
o__Clostridiales, 352171	2.2	0.436867	1.35366	0.718498	0.982904	1	1.4	-0.104333	-1.075	0.934039	0.97244	1	2.2	-0.5412	-1.45518	0.656062	0.993871	1	1.4	-3.2467	-9.49192	0.111005	0.739844	1	2.2	-3.68357	-12.8488	0.0667839	0.918974	1	1.2	-3.14237	-8.82971	0.123313	0.993629	1
f__Lachnospiraceae, 351881	2.6	0.470456	1.38555	0.692071	0.982904	1	3.6	0.983236	1.97689	0.402233	0.80739	1	3.6	0.51278	1.4268	0.650672	0.993871	1	2.8	0.710787	1.6367	0.549947	0.90078	1	2.8	0.240332	1.18126	0.834183	0.963978	1	3.6	-0.272449	-1.20786	0.810049	0.993629	1
s__gnavus, 351734	0	0.301765	1.23265	0.912655	0.982904	1	0.4	2.47877	5.57423	0.27624	0.76967	1	0.4	2.17701	4.52215	0.274206	0.993871	1	0	0.694867	1.61874	0.796381	0.90078	1	0	0.393102	1.31321	0.872847	0.963978	1	0.4	-1.78391	-3.44357	0.350277	0.993629	1
o__Clostridiales, 350392	9.6	-0.278656	-1.21306	0.771149	0.982904	1	9.6	-0.520772	-1.43472	0.590006	0.946826	1	9.6	-0.242116	-1.18273	0.802215	0.993871	1	9.6	-0.849692	-1.80212	0.385337	0.794631	1	9.6	-0.571036	-1.48559	0.559662	0.963978	1	6.2	-0.32892	-1.25607	0.738998	0.993629	1
f__Lachnospiraceae, 349864	0	0.302338	1.23314	0.915849	0.982904	1	0.4	2.515	5.71599	0.295563	0.76967	1	0.4	2.21266	4.6353	0.299536	0.993871	1	0.8	3.28215	9.72806	0.161329	0.739844	1	0.8	2.97981	7.88884	0.148775	0.918974	1	0.8	0.76715	1.7019	0.573074	0.993629	1
f__Ruminococcaceae, 349246	2	-0.848397	-1.8005	0.556489	0.982904	1	2	-0.781545	-1.71897	0.589943	0.946826	1	1.4	0.0668524	1.04743	0.964169	0.993871	1	2	-1.03068	-2.04299	0.487003	0.84811	1	1.4	-0.182282	-1.13468	0.904543	0.971539	1	1.2	-0.249134	-1.18849	0.870408	0.993629	1
o__Clostridiales, 349036	0	0.302076	1.23292	0.914413	0.982904	1	0	0.437131	1.35391	0.876951	0.946826	1	0	0.135055	1.09813	0.958525	0.993871	1	0.6	3.05055	8.2853	0.184619	0.739844	1	0.6	2.74848	6.72008	0.172621	0.918974	1	0.6	2.61342	6.11954	0.198544	0.993629	1
o__Clostridiales, 348875	0	0.301765	1.23265	0.912655	0.982904	1	0.4	2.47895	5.57492	0.2762	0.76967	1	0.4	2.17719	4.52271	0.274161	0.993871	1	0	0.694867	1.61874	0.796381	0.90078	1	0	0.393102	1.31321	0.872847	0.963978	1	0.4	-1.78409	-3.444	0.350222	0.993629	1
o__Clostridiales, 348398	0.6	0.50074	1.41494	0.748913	0.982904	1	0.4	0.129203	1.09369	0.937016	0.97244	1	0.6	-0.371537	-1.29373	0.808803	0.993871	1	0.4	0.118635	1.08571	0.942715	0.969032	1	0.6	-0.382105	-1.30324	0.805574	0.963978	1	0.4	-0.0105673	-1.00735	0.994807	0.999433	1
o__Clostridiales, 348142	0.6	0.35141	1.27581	0.823366	0.982904	1	0.4	0.0716994	1.05095	0.965062	0.980684	1	0.6	-0.279711	-1.21395	0.857262	0.993871	1	0.4	0.319809	1.24817	0.842797	0.923	1	0.6	-0.0316013	-1.02215	0.983517	0.996175	1	0.4	0.24811	1.18765	0.876302	0.993629	1
f__S24-7, 348038	1.6	0.485438	1.40001	0.678561	0.982904	1	1	-3.09571	-8.54872	0.139185	0.76967	1	1.6	-3.58115	-11.9683	0.0816564	0.993871	1	1	-0.932898	-1.90911	0.498888	0.861206	1	1.6	-1.41834	-2.67277	0.283826	0.918974	1	0.4	2.16281	4.47786	0.321597	0.993629	1
s__reuteri, 347063	0	0.301765	1.23265	0.912676	0.982904	1	0.4	2.47903	5.57521	0.276352	0.76967	1	0.4	2.17726	4.52295	0.274357	0.993871	1	0	0.694867	1.61874	0.796431	0.90078	1	0	0.393102	1.31321	0.872884	0.963978	1	0.4	-1.78416	-3.44418	0.350435	0.993629	1
f__S24-7, 346870	3	0.495924	1.41022	0.653984	0.982904	1	4.2	1.01744	2.02432	0.351313	0.76967	1	4.2	0.521513	1.43546	0.618508	0.993871	1	1.8	0.00607317	1.00422	0.995787	0.997231	1	3	-0.489851	-1.4043	0.658433	0.963978	1	4.2	-1.01136	-2.01582	0.354941	0.993629	1
o__Clostridiales, 346719	0	0.301765	1.23265	0.912655	0.982904	1	0	0.437342	1.35411	0.874267	0.946826	1	0	0.135578	1.09853	0.957326	0.993871	1	0.4	2.59991	6.06248	0.252296	0.739844	1	0.4	2.29814	4.91825	0.246888	0.918974	1	0.4	2.16257	4.47711	0.280119	0.993629	1
o__Clostridiales, 345557	58	0.0900584	1.06441	0.91314	0.982904	1	67	0.443653	1.36004	0.590768	0.946826	1	67	0.353595	1.27774	0.667735	0.993871	1	67	0.536864	1.45082	0.515275	0.87924	1	67	0.446806	1.36302	0.587562	0.963978	1	67	0.0932109	1.06674	0.909851	0.993629	1
g__Adlercreutzia, 344828	0	0.301765	1.23265	0.914382	0.982904	1	0.4	2.47877	5.57423	0.290137	0.76967	1	0.4	2.17701	4.52215	0.291849	0.993871	1	0.4	2.5999	6.06243	0.266233	0.739844	1	0.4	2.29813	4.91821	0.264571	0.918974	1	0.4	0.121124	1.08758	0.929157	0.993629	1
f__Lachnospiraceae, 344108	4.8	0.126557	1.09169	0.919353	0.982904	1	4.4	-0.254536	-1.19295	0.840784	0.946826	1	4.8	-0.381093	-1.30233	0.761443	0.993871	1	4.4	-1.04273	-2.06012	0.426965	0.79601	1	4.8	-1.16929	-2.24901	0.368884	0.918974	1	3	-0.788195	-1.72691	0.549732	0.993629	1
o__Clostridiales, 343581	6.6	-0.402609	-1.3219	0.74939	0.982904	1	6.6	-0.209438	-1.15624	0.867926	0.946826	1	5.4	0.193171	1.14327	0.878388	0.993871	1	8	0.322815	1.25077	0.796331	0.90078	1	8	0.725424	1.65339	0.562863	0.963978	1	8	0.532253	1.44619	0.670963	0.993629	1
s__gnavus, 342887	0	0.302076	1.23292	0.914427	0.982904	1	0	0.437131	1.35391	0.87697	0.946826	1	0	0.135055	1.09813	0.958533	0.993871	1	0.6	3.05055	8.2853	0.184727	0.739844	1	0.6	2.74848	6.72008	0.172756	0.918974	1	0.6	2.61342	6.11954	0.198681	0.993629	1
f__Clostridiaceae, 342504	7.4	0.178444	1.13166	0.855189	0.982904	1	9.6	0.463419	1.37881	0.634667	0.946826	1	9.6	0.284976	1.21839	0.7677	0.993871	1	11.8	1.0957	2.13716	0.257255	0.739844	1	11.8	0.917254	1.88852	0.337604	0.918974	1	11.8	0.632279	1.55001	0.507486	0.993629	1
o__Clostridiales, 342404	8.8	-0.118442	-1.08556	0.903412	0.982904	1	8.6	-1.63458	-3.10497	0.111814	0.76967	1	8.8	-1.51614	-2.86025	0.139233	0.993871	1	8.6	-1.34526	-2.54076	0.186842	0.739844	1	8.8	-1.22682	-2.3405	0.22747	0.918974	1	3	0.28932	1.22206	0.786174	0.993629	1
o__Clostridiales, 342075	0	0.302376	1.23317	0.915334	0.982904	1	0	0.436933	1.35372	0.878436	0.946826	1	0	0.134557	1.09776	0.959236	0.993871	1	0.8	3.3808	10.4165	0.144325	0.739844	1	0.8	3.07843	8.44693	0.129957	0.918974	1	0.8	2.94387	7.69473	0.151061	0.993629	1
f__S24-7, 341913	46.8	-0.301962	-1.23282	0.700963	0.982904	1	46.8	-0.529927	-1.44386	0.501452	0.928292	1	38	-0.227965	-1.17118	0.772469	0.993871	1	46.8	-0.642095	-1.56059	0.416241	0.79601	1	38	-0.340133	-1.26587	0.666753	0.963978	1	28.6	-0.112168	-1.08085	0.887362	0.993629	1
g__Lactobacillus, 340960	0	0.302869	1.2336	0.916745	0.982904	1	0	0.436623	1.35343	0.88072	0.946826	1	0	0.133754	1.09714	0.960326	0.993871	1	1	3.83028	14.2242	0.103907	0.739844	1	1	3.52741	11.5307	0.0893346	0.918974	1	1	3.39365	10.5097	0.105015	0.993629	1
g__Ruminococcus, 340794	11.8	-0.141649	-1.10317	0.919158	0.982904	1	13	0.0489223	1.03449	0.97203	0.983042	1	13	0.190571	1.14122	0.891239	0.993871	1	20.2	0.992264	1.9893	0.474965	0.833489	1	20.2	1.13391	2.19453	0.413739	0.918974	1	20.2	0.943342	1.92298	0.496412	0.993629	1
o__Clostridiales, 340451	0	0.302804	1.23354	0.917559	0.982904	1	0.8	3.44965	10.9256	0.151371	0.76967	1	0.8	3.14684	8.85715	0.139752	0.993871	1	1.2	4.16928	17.9919	0.079123	0.739844	1	1.2	3.86647	14.5856	0.0652407	0.918974	1	1.2	0.719631	1.64676	0.572027	0.993629	1
g__Coprococcus, 339791	0.6	0.493837	1.40818	0.754967	0.982904	1	0.4	0.241858	1.18251	0.882796	0.946826	1	0.6	-0.251979	-1.19084	0.869332	0.993871	1	1	1.28177	2.43137	0.401029	0.794631	1	1	0.787932	1.7266	0.575933	0.963978	1	1	1.03991	2.0561	0.480435	0.993629	1
f__Ruminococcaceae, 339566	3	-0.667478	-1.58829	0.57934	0.982904	1	3	-0.636144	-1.55417	0.599476	0.946826	1	2	0.031334	1.02196	0.979689	0.995377	1	3	-0.838332	-1.78798	0.495968	0.857235	1	1.8	-0.170854	-1.12572	0.891317	0.969861	1	2	-0.202188	-1.15044	0.872254	0.993629	1
f__S24-7, 339549	276	-0.0859916	-1.06142	0.900177	0.982904	1	245.2	-0.215489	-1.1611	0.753357	0.946826	1	276	-0.129498	-1.09391	0.850188	0.993871	1	245.2	-0.143402	-1.10451	0.83438	0.91742	1	276	-0.0574105	-1.0406	0.933271	0.978207	1	230.8	0.0720871	1.05124	0.916301	0.993629	1
g__Bacteroides, 339013	73.2	-0.214476	-1.16028	0.80038	0.982904	1	73.2	-0.30021	-1.23132	0.723598	0.946826	1	67.6	-0.085734	-1.06123	0.919534	0.993871	1	73.2	-0.4481	-1.36424	0.597966	0.90078	1	67.6	-0.233624	-1.17578	0.78332	0.963978	1	57	-0.14789	-1.10795	0.86191	0.993629	1
g__Adlercreutzia, 338644	0	0.302858	1.23359	0.916839	0.982904	1	0.6	3.09517	8.54552	0.196853	0.76967	1	0.6	2.79231	6.92739	0.188788	0.993871	1	0.6	3.17155	9.01015	0.186218	0.739844	1	0.6	2.86869	7.30403	0.177214	0.918974	1	0.6	0.0763823	1.05437	0.95532	0.997082	1
f__S24-7, 338258	19.6	-0.35104	-1.27548	0.607806	0.982904	1	19.6	-0.580768	-1.49565	0.399639	0.805014	1	16.8	-0.229728	-1.17261	0.739346	0.993871	1	19.6	-0.702992	-1.62788	0.310805	0.773373	1	16.8	-0.351952	-1.27629	0.612329	0.963978	1	12.6	-0.122224	-1.08841	0.861382	0.993629	1
g__Ruminococcus, 337762	0	0.301765	1.23265	0.91298	0.982904	1	0	0.437342	1.35411	0.874728	0.946826	1	0	0.135578	1.09853	0.957509	0.993871	1	0.8	3.39297	10.5047	0.125038	0.739844	1	0.8	3.0912	8.52207	0.106731	0.918974	1	0.8	2.95563	7.75768	0.126557	0.993629	1
g__Oscillospira, 337727	6.2	-0.543183	-1.45718	0.620218	0.982904	1	6.2	-1.11394	-2.16436	0.323149	0.76967	1	4	-0.570759	-1.4853	0.615271	0.993871	1	6.2	-0.13259	-1.09626	0.903317	0.947214	1	4.2	0.410593	1.32923	0.708955	0.963978	1	4.2	0.981352	1.97431	0.385665	0.993629	1
o__Clostridiales, 337494	20.4	-0.466065	-1.38134	0.705547	0.982904	1	20.4	-1.4002	-2.63939	0.261231	0.76967	1	13.2	-0.934137	-1.91075	0.454015	0.993871	1	20.4	-1.63036	-3.09591	0.193107	0.739844	1	13.2	-1.1643	-2.24124	0.353183	0.918974	1	6	-0.23016	-1.17296	0.855812	0.993629	1
o__Clostridiales, 337336	2	-0.685643	-1.60842	0.588543	0.982904	1	2	-1.86238	-3.63608	0.196018	0.76967	1	1.2	-1.17674	-2.26065	0.422974	0.993871	1	2	-1.05771	-2.08162	0.427113	0.79601	1	1.2	-0.372064	-1.2942	0.784772	0.963978	1	0.8	0.804676	1.74675	0.597623	0.993629	1
s__muciniphila, 336632	0.8	-0.688489	-1.6116	0.637003	0.982904	1	0.8	-1.00631	-2.00876	0.513086	0.935866	1	0.6	-0.317818	-1.24644	0.841799	0.993871	1	1.4	0.675649	1.59731	0.614922	0.90078	1	1.4	1.36414	2.57422	0.331353	0.918974	1	1.4	1.68196	3.20863	0.257962	0.993629	1
f__Lachnospiraceae, 334751	1	0.418465	1.3365	0.766595	0.982904	1	1.2	0.902503	1.86931	0.513676	0.935866	1	1.2	0.484038	1.39865	0.71044	0.993871	1	2.8	1.94349	3.84636	0.142953	0.739844	1	2.8	1.52503	2.87792	0.22068	0.918974	1	2.8	1.04099	2.05764	0.390969	0.993629	1
f__Lachnospiraceae, 334619	7.8	0.259991	1.19747	0.752818	0.982904	1	6.2	-0.225399	-1.1691	0.789289	0.946826	1	7.8	-0.48539	-1.39996	0.558607	0.993871	1	9	0.716241	1.6429	0.383328	0.794631	1	9	0.456251	1.37197	0.572119	0.963978	1	9	0.94164	1.92071	0.254225	0.993629	1
o__Clostridiales, 332132	0	0.301765	1.23265	0.912655	0.982904	1	0.4	2.47877	5.57423	0.27624	0.76967	1	0.4	2.17701	4.52215	0.274206	0.993871	1	0	0.694867	1.61874	0.796381	0.90078	1	0	0.393102	1.31321	0.872847	0.963978	1	0.4	-1.78391	-3.44357	0.350277	0.993629	1
o__Clostridiales, 331782	1.8	-0.342238	-1.26772	0.811705	0.982904	1	3.8	0.617227	1.53392	0.6603	0.946826	1	3.8	0.959465	1.94459	0.49582	0.993871	1	4.6	1.02451	2.03427	0.463091	0.823075	1	4.6	1.36675	2.57888	0.329151	0.918974	1	4.6	0.407281	1.32618	0.765841	0.993629	1
f__S24-7, 331772	1.8	0.246632	1.18643	0.845807	0.982904	1	1.2	-0.478303	-1.3931	0.720999	0.946826	1	1.8	-0.724935	-1.65283	0.579069	0.993871	1	1.4	0.268714	1.20473	0.83419	0.91742	1	1.8	0.0220821	1.01542	0.985902	0.996728	1	1.4	0.747017	1.67832	0.571971	0.993629	1
o__Clostridiales, 331117	2.6	0.408347	1.32716	0.747748	0.982904	1	2.2	0.272821	1.20817	0.831637	0.946826	1	2.6	-0.135526	-1.09849	0.913578	0.993871	1	2.8	0.421438	1.33926	0.742183	0.90078	1	2.8	0.0130915	1.00912	0.991621	0.997549	1	2.8	0.148617	1.10851	0.906135	0.993629	1
f__S24-7, 331043	143.6	-0.077012	-1.05483	0.919346	0.982904	1	143.6	-0.234643	-1.17662	0.757838	0.946826	1	137	-0.157631	-1.11545	0.835843	0.993871	1	143.6	-0.232389	-1.17478	0.760155	0.90078	1	137	-0.155376	-1.11371	0.838201	0.963978	1	109.8	0.0022546	1.00156	0.997637	0.999433	1
o__Clostridiales, 330296	0	0.301765	1.23265	0.912655	0.982904	1	0.4	2.47895	5.57492	0.2762	0.76967	1	0.4	2.17719	4.52271	0.274161	0.993871	1	0	0.694867	1.61874	0.796381	0.90078	1	0	0.393102	1.31321	0.872847	0.963978	1	0.4	-1.78409	-3.444	0.350222	0.993629	1
o__Clostridiales, 329678	0	0.301765	1.23265	0.912655	0.982904	1	0.4	2.47868	5.57388	0.27626	0.76967	1	0.4	2.17692	4.52186	0.274229	0.993871	1	0	0.694867	1.61874	0.796381	0.90078	1	0	0.393102	1.31321	0.872847	0.963978	1	0.4	-1.78381	-3.44335	0.350305	0.993629	1
g__Lactobacillus, 329402	0	0.301765	1.23265	0.912655	0.982904	1	0	0.437342	1.35411	0.874267	0.946826	1	0	0.135578	1.09853	0.957326	0.993871	1	0.4	2.59972	6.06167	0.252336	0.739844	1	0.4	2.29795	4.91759	0.246934	0.918974	1	0.4	2.16237	4.47651	0.280168	0.993629	1
o__Clostridiales, 328383	1	0.415321	1.3336	0.75688	0.982904	1	0.6	-2.50626	-5.68147	0.245992	0.76967	1	1	-2.92159	-7.57678	0.166595	0.993871	1	0.6	-0.406979	-1.32591	0.784925	0.90078	1	1	-0.822299	-1.76822	0.562698	0.963978	1	0.4	2.09929	4.28497	0.34222	0.993629	1
o__Clostridiales, 327656	0.8	0.666962	1.58773	0.669661	0.982904	1	0.8	0.929292	1.90434	0.549496	0.946826	1	0.8	0.26233	1.19941	0.853072	0.993871	1	0.8	0.906835	1.87493	0.562301	0.90078	1	0.8	0.239873	1.18089	0.866789	0.963978	1	0.8	-0.0224569	-1.01569	0.987367	0.998551	1
o__Clostridiales, 326701	0	0.301765	1.23265	0.912655	0.982904	1	0	0.437342	1.35411	0.874267	0.946826	1	0	0.135578	1.09853	0.957326	0.993871	1	0.4	2.59991	6.06248	0.252296	0.739844	1	0.4	2.29814	4.91825	0.246888	0.918974	1	0.4	2.16257	4.47711	0.280119	0.993629	1
f__Coriobacteriaceae, 326048	0	0.302482	1.23326	0.917321	0.982904	1	0.4	2.55959	5.89542	0.298401	0.76967	1	0.4	2.25711	4.78033	0.303914	0.993871	1	2	4.71435	26.2519	0.0441521	0.6159	1	2	4.41187	21.2865	0.0323086	0.918974	1	2	2.15476	4.45294	0.109853	0.993629	1
g__Coprococcus, 325126	15.6	-0.2212	-1.1657	0.806279	0.982904	1	15.4	-0.557962	-1.47219	0.539407	0.946826	1	15.6	-0.336762	-1.26292	0.710863	0.993871	1	15.4	-1.28854	-2.4428	0.165128	0.739844	1	15.6	-1.06734	-2.09556	0.249894	0.918974	1	10	-0.730573	-1.6593	0.434383	0.993629	1
o__Clostridiales, 324999	0	0.301765	1.23265	0.912655	0.982904	1	0	0.437342	1.35411	0.874267	0.946826	1	0	0.135578	1.09853	0.957326	0.993871	1	0.4	2.59972	6.06167	0.252336	0.739844	1	0.4	2.29795	4.91759	0.246934	0.918974	1	0.4	2.16237	4.47651	0.280168	0.993629	1
f__Lachnospiraceae, 323829	0	0.301765	1.23265	0.912655	0.982904	1	0	0.437342	1.35411	0.874267	0.946826	1	0	0.135578	1.09853	0.957326	0.993871	1	0.4	2.5999	6.06243	0.252299	0.739844	1	0.4	2.29813	4.91821	0.246891	0.918974	1	0.4	2.16255	4.47707	0.280122	0.993629	1
o__Clostridiales, 322466	5.4	0.133659	1.09707	0.900609	0.982904	1	6.6	0.541206	1.45519	0.611086	0.946826	1	6.6	0.407547	1.32643	0.698609	0.993871	1	4	-0.21813	-1.16322	0.841338	0.922865	1	5.4	-0.351789	-1.27614	0.744221	0.963978	1	6.6	-0.759336	-1.69271	0.478875	0.993629	1
f__Lachnospiraceae, 322062	2.8	-0.347639	-1.27248	0.782632	0.982904	1	2.8	-1.66651	-3.17445	0.224224	0.76967	1	2.2	-1.31887	-2.4947	0.337415	0.993871	1	2.8	-0.456709	-1.37241	0.721061	0.90078	1	2.2	-0.10907	-1.07853	0.932255	0.978207	1	2.2	1.2098	2.31305	0.384912	0.993629	1
g__Oscillospira, 321484	0	0.301765	1.23265	0.912655	0.982904	1	0	0.437342	1.35411	0.874267	0.946826	1	0	0.135578	1.09853	0.957326	0.993871	1	0.4	2.59972	6.06167	0.252336	0.739844	1	0.4	2.29795	4.91759	0.246934	0.918974	1	0.4	2.16237	4.47651	0.280168	0.993629	1
o__Clostridiales, 321195	0	0.301765	1.23265	0.91321	0.982904	1	0	0.437342	1.35411	0.875054	0.946826	1	0	0.135578	1.09853	0.957638	0.993871	1	0.8	3.39298	10.5048	0.126603	0.739844	1	0.8	3.09122	8.52214	0.108627	0.918974	1	0.8	2.95564	7.75775	0.128566	0.993629	1
g__Ruminococcus, 320224	3	-0.156727	-1.11476	0.88489	0.982904	1	3	0.0974793	1.0699	0.927958	0.97244	1	3	0.254207	1.19268	0.812857	0.993871	1	3	0.11258	1.08116	0.917151	0.954473	1	3	0.269308	1.20523	0.80271	0.963978	1	3	0.015101	1.01052	0.988776	0.998551	1
o__Clostridiales, 319219	0	0.301765	1.23265	0.912655	0.982904	1	0.4	2.47877	5.57423	0.27624	0.76967	1	0.4	2.17701	4.52215	0.274206	0.993871	1	0	0.694867	1.61874	0.796381	0.90078	1	0	0.393102	1.31321	0.872847	0.963978	1	0.4	-1.78391	-3.44357	0.350277	0.993629	1
g__Lactobacillus, 318764	0	0.301765	1.23265	0.914403	0.982904	1	0	0.437342	1.35411	0.876744	0.946826	1	0	0.135578	1.09853	0.958307	0.993871	1	1	3.6698	12.7269	0.103197	0.739844	1	1	3.36804	10.3248	0.0859134	0.918974	1	1	3.23246	9.3987	0.10235	0.993629	1
g__Lactobacillus, 318583	0	0.301765	1.23265	0.912894	0.982904	1	0.4	2.47896	5.57494	0.278122	0.76967	1	0.4	2.17719	4.52272	0.276615	0.993871	1	0	0.694867	1.61874	0.796956	0.90078	1	0	0.393102	1.31321	0.873275	0.963978	1	0.4	-1.78409	-3.44401	0.352917	0.993629	1
o__Clostridiales, 318162	35.8	-0.584067	-1.49907	0.556432	0.982904	1	35.8	-0.733927	-1.66316	0.460907	0.875533	1	23.6	-0.149859	-1.10946	0.880539	0.993871	1	35.8	-1.07187	-2.10216	0.283668	0.747743	1	23.6	-0.487806	-1.40231	0.62623	0.963978	1	18	-0.337947	-1.26396	0.73638	0.993629	1
g__Oscillospira, 317633	3	-0.436743	-1.35355	0.710101	0.982904	1	3	-1.13943	-2.20294	0.352351	0.76967	1	3	-0.702685	-1.62753	0.568488	0.993871	1	3	-0.784872	-1.72294	0.515702	0.87924	1	3	-0.348129	-1.27291	0.774414	0.963978	1	1.6	0.354556	1.27859	0.778972	0.993629	1
s__gnavus, 317073	0	0.301765	1.23265	0.912655	0.982904	1	0	0.437342	1.35411	0.874267	0.946826	1	0	0.135578	1.09853	0.957326	0.993871	1	0.4	2.59972	6.06167	0.252336	0.739844	1	0.4	2.29795	4.91759	0.246934	0.918974	1	0.4	2.16237	4.47651	0.280168	0.993629	1
f__S24-7, 315147	15.8	-0.222879	-1.16706	0.713465	0.982904	1	15.8	-0.16212	-1.11893	0.789936	0.946826	1	15.2	0.060759	1.04301	0.920384	0.993871	1	15.8	-0.296559	-1.22821	0.628614	0.90078	1	15.2	-0.0736807	-1.0524	0.904244	0.971539	1	14	-0.13444	-1.09767	0.826701	0.993629	1
f__S24-7, 313878	2	0.505371	1.41949	0.673883	0.982904	1	1.4	0.188414	1.13951	0.878696	0.946826	1	2	-0.316957	-1.2457	0.787889	0.993871	1	1.2	0.182776	1.13507	0.883109	0.937057	1	2	-0.322595	-1.25058	0.78581	0.963978	1	1.4	-0.00563785	-1.00392	0.996316	0.999433	1
g__Oscillospira, 311859	1.4	0.434679	1.35161	0.745042	0.982904	1	1	-0.931356	-1.90707	0.541257	0.946826	1	1.4	-1.36603	-2.57761	0.35271	0.993871	1	1	-2.66091	-6.32433	0.202856	0.739844	1	1.4	-3.09559	-8.54803	0.131031	0.918974	1	0.4	-1.72956	-3.31626	0.426948	0.993629	1
f__Lachnospiraceae, 310760	14.8	0.294051	1.22608	0.691416	0.982904	1	15.6	0.507454	1.42154	0.49288	0.919112	1	15.6	0.213403	1.15942	0.770149	0.993871	1	17.8	0.60947	1.5257	0.410262	0.794631	1	17.8	0.315419	1.24437	0.665908	0.963978	1	17.8	0.102016	1.07327	0.888817	0.993629	1
o__Clostridiales, 310748	86.6	-0.497048	-1.41132	0.571895	0.982904	1	86.6	-1.14522	-2.2118	0.194143	0.76967	1	61.8	-0.648171	-1.56718	0.462656	0.993871	1	86.6	-1.33387	-2.52078	0.131101	0.739844	1	61.8	-0.836825	-1.78612	0.343808	0.918974	1	35.8	-0.188654	-1.1397	0.831504	0.993629	1
f__Ruminococcaceae, 309720	7	-0.562219	-1.47654	0.560754	0.982904	1	7	-0.925413	-1.89923	0.348464	0.76967	1	5.2	-0.363194	-1.28627	0.715311	0.993871	1	7	-0.297038	-1.22862	0.758584	0.90078	1	5.2	0.265181	1.20179	0.785725	0.963978	1	4.8	0.628375	1.54582	0.528016	0.993629	1
o__Clostridiales, 309249	128.8	-0.456147	-1.37187	0.666416	0.982904	1	128.8	-1.01196	-2.01666	0.339625	0.76967	1	96	-0.555818	-1.47	0.600037	0.993871	1	128.8	-1.14974	-2.21873	0.278319	0.745217	1	96	-0.693589	-1.6173	0.51322	0.963978	1	56.8	-0.137771	-1.1002	0.896819	0.993629	1
g__Oscillospira, 307608	19.8	-0.313794	-1.24297	0.617782	0.982904	1	19.8	-1.22177	-2.33232	0.0600059	0.76967	1	18.2	-0.907971	-1.8764	0.162557	0.993871	1	19.8	-1.04435	-2.06244	0.106898	0.739844	1	18.2	-0.73056	-1.65928	0.259787	0.918974	1	9.2	0.177411	1.13085	0.790698	0.993629	1
o__Clostridiales, 307373	0.6	-0.378603	-1.30008	0.798623	0.982904	1	0.6	-0.266801	-1.20314	0.858182	0.946826	1	0.4	0.111802	1.08058	0.941442	0.993871	1	0.6	-2.08693	-4.24844	0.315418	0.779961	1	0.4	-1.70833	-3.26782	0.415854	0.918974	1	0.4	-1.82013	-3.53113	0.387467	0.993629	1
f__Ruminococcaceae, 299331	0	0.301765	1.23265	0.912655	0.982904	1	0.4	2.47877	5.57423	0.27624	0.76967	1	0.4	2.17701	4.52215	0.274206	0.993871	1	0	0.694867	1.61874	0.796381	0.90078	1	0	0.393102	1.31321	0.872847	0.963978	1	0.4	-1.78391	-3.44357	0.350277	0.993629	1
g__Oscillospira, 298163	0.8	0.685944	1.60875	0.622624	0.982904	1	0.4	-1.91512	-3.77145	0.37761	0.783002	1	0.8	-2.60106	-6.06733	0.210477	0.993871	1	0.4	-1.65348	-3.14591	0.426437	0.79601	1	0.8	-2.33942	-5.061	0.237694	0.918974	1	0	0.26164	1.19884	0.919451	0.993629	1
s__gnavus, 295075	10	-0.214285	-1.16013	0.876327	0.982904	1	22.6	1.03641	2.05111	0.448286	0.861034	1	22.6	1.25069	2.37956	0.359837	0.993871	1	17.8	1.00843	2.01172	0.460942	0.821569	1	17.8	1.22272	2.33386	0.371015	0.918974	1	22.6	-0.027976	-1.01958	0.983547	0.99803	1
f__Lachnospiraceae, 294708	0	0.301765	1.23265	0.912937	0.982904	1	0.4	2.47896	5.57494	0.278462	0.76967	1	0.4	2.17719	4.52272	0.277049	0.993871	1	0	0.694867	1.61874	0.797058	0.90078	1	0	0.393102	1.31321	0.873351	0.963978	1	0.4	-1.78409	-3.44401	0.353393	0.993629	1
f__Lachnospiraceae, 294370	2.8	-0.144893	-1.10565	0.919979	0.982904	1	4.2	0.412157	1.33067	0.773012	0.946826	1	4.2	0.55705	1.47126	0.695701	0.993871	1	5.6	1.14277	2.20805	0.41905	0.79601	1	5.6	1.28767	2.44133	0.360923	0.918974	1	5.6	0.730618	1.65935	0.600654	0.993629	1
f__Lachnospiraceae, 291950	0	0.301765	1.23265	0.912655	0.982904	1	0	0.437342	1.35411	0.874267	0.946826	1	0	0.135578	1.09853	0.957326	0.993871	1	0.4	2.59972	6.06167	0.252336	0.739844	1	0.4	2.29795	4.91759	0.246934	0.918974	1	0.4	2.16237	4.47651	0.280168	0.993629	1
f__Lachnospiraceae, 290917	0	0.302383	1.23318	0.915767	0.982904	1	1.2	3.89428	14.8695	0.090491	0.76967	1	1.2	3.5919	12.0578	0.074656	0.993871	1	0	0.698973	1.62335	0.803051	0.90078	1	0	0.39659	1.31639	0.877525	0.963978	1	1.2	-3.19531	-9.15976	0.0985467	0.993629	1
o__Clostridiales, 290210	10.4	-0.445929	-1.36219	0.671432	0.982904	1	10.4	-1.45119	-2.73434	0.180017	0.76967	1	7.8	-1.00526	-2.00731	0.354253	0.993871	1	10.4	-0.823146	-1.76926	0.439824	0.804533	1	7.8	-0.377217	-1.29883	0.72403	0.963978	1	5.6	0.628045	1.54547	0.567691	0.993629	1
f__S24-7, 290178	1	0.227896	1.17113	0.862744	0.982904	1	0.8	-0.677571	-1.59944	0.643685	0.946826	1	1	-0.905468	-1.87315	0.523499	0.993871	1	0.8	-0.19667	-1.14605	0.888298	0.939836	1	1	-0.424567	-1.34217	0.753586	0.963978	1	0.6	0.480901	1.39561	0.747826	0.993629	1
f__Lachnospiraceae, 289984	7.8	0.498904	1.41314	0.63153	0.982904	1	6	0.0832782	1.05942	0.936954	0.97244	1	7.8	-0.415626	-1.33388	0.687969	0.993871	1	6.6	0.312777	1.2421	0.765757	0.90078	1	7.8	-0.186127	-1.13771	0.856851	0.963978	1	6.6	0.229499	1.17243	0.826083	0.993629	1
o__Clostridiales, 287879	0	0.301765	1.23265	0.912655	0.982904	1	0	0.437342	1.35411	0.874267	0.946826	1	0	0.135578	1.09853	0.957326	0.993871	1	0.4	2.59991	6.06248	0.252296	0.739844	1	0.4	2.29814	4.91825	0.246888	0.918974	1	0.4	2.16257	4.47711	0.280119	0.993629	1
g__Oscillospira, 277588	1.8	-0.750833	-1.68276	0.59074	0.982904	1	1.8	-3.70247	-13.0183	0.0919609	0.76967	1	1	-2.95163	-7.73624	0.184225	0.993871	1	1.8	-1.1135	-2.1637	0.447878	0.809581	1	1	-0.362669	-1.2858	0.809624	0.963978	1	0.6	2.58896	6.01666	0.253671	0.993629	1
f__S24-7, 277364	0	0.301765	1.23265	0.912655	0.982904	1	0	0.437342	1.35411	0.874267	0.946826	1	0	0.135578	1.09853	0.957326	0.993871	1	0.4	2.59991	6.06248	0.252296	0.739844	1	0.4	2.29814	4.91825	0.246888	0.918974	1	0.4	2.16257	4.47711	0.280119	0.993629	1
o__Clostridiales, 277293	2.8	-0.330653	-1.25758	0.763532	0.982904	1	3	0.0288531	1.0202	0.978881	0.98674	1	3	0.359506	1.28299	0.742394	0.993871	1	4.4	0.631261	1.54892	0.555933	0.90078	1	4.4	0.961914	1.94789	0.371272	0.918974	1	4.4	0.602408	1.51825	0.572181	0.993629	1
g__Oscillospira, 277204	6.4	0.172319	1.12687	0.877944	0.982904	1	5.8	-0.61298	-1.52941	0.594142	0.946826	1	6.4	-0.785299	-1.72345	0.490738	0.993871	1	5.8	-1.10575	-2.1521	0.348624	0.794631	1	6.4	-1.27807	-2.42514	0.274338	0.918974	1	3	-0.492766	-1.40714	0.680435	0.993629	1
o__Clostridiales, 277130	0	0.301765	1.23265	0.912655	0.982904	1	0.4	2.47877	5.57423	0.27624	0.76967	1	0.4	2.17701	4.52215	0.274206	0.993871	1	0	0.694867	1.61874	0.796381	0.90078	1	0	0.393102	1.31321	0.872847	0.963978	1	0.4	-1.78391	-3.44357	0.350277	0.993629	1
o__Clostridiales, 276808	0	0.301765	1.23265	0.912655	0.982904	1	0	0.437342	1.35411	0.874267	0.946826	1	0	0.135578	1.09853	0.957326	0.993871	1	0.4	2.5999	6.06243	0.252299	0.739844	1	0.4	2.29813	4.91821	0.246891	0.918974	1	0.4	2.16255	4.47707	0.280122	0.993629	1
o__Clostridiales, 276762	7.6	0.173963	1.12815	0.886107	0.982904	1	6.6	-0.509693	-1.42375	0.679524	0.946826	1	7.6	-0.683656	-1.60621	0.576776	0.993871	1	6.6	-0.0726461	-1.05164	0.952713	0.97459	1	7.6	-0.24661	-1.18642	0.83931	0.963978	1	6.2	0.437047	1.35383	0.723506	0.993629	1
f__S24-7, 276629	13.2	-0.426876	-1.34432	0.65801	0.982904	1	13.2	-0.787306	-1.72585	0.418367	0.826559	1	9.8	-0.36043	-1.28381	0.711569	0.993871	1	13.2	-1.45122	-2.7344	0.143737	0.739844	1	9.8	-1.02435	-2.03404	0.303004	0.918974	1	7.2	-0.663916	-1.58438	0.507923	0.993629	1
o__Clostridiales, 276312	476.8	-0.565477	-1.47988	0.55662	0.982904	1	476.8	-0.888163	-1.85082	0.355988	0.76967	1	324.6	-0.322686	-1.25066	0.737392	0.993871	1	476.8	-1.14202	-2.2069	0.235441	0.739844	1	324.6	-0.576542	-1.49127	0.549245	0.963978	1	213.6	-0.253856	-1.19239	0.792079	0.993629	1
o__Clostridiales, 276115	8.4	-0.2508	-1.18987	0.815232	0.982904	1	8.4	-0.978665	-1.97064	0.372644	0.776342	1	7.8	-0.727864	-1.65619	0.507122	0.993871	1	8.4	-1.2285	-2.34323	0.269418	0.739844	1	7.8	-0.977701	-1.96932	0.37925	0.918974	1	3.8	-0.249836	-1.18907	0.825865	0.993629	1
f__Lachnospiraceae, 275563	5.2	-0.192815	-1.14299	0.853157	0.982904	1	5.2	-1.65326	-3.14543	0.143641	0.76967	1	4.8	-1.46044	-2.75192	0.195637	0.993871	1	6.8	0.443277	1.35969	0.667383	0.90078	1	6.8	0.636092	1.55411	0.536593	0.963978	1	6.8	2.09653	4.2768	0.061015	0.993629	1
o__Clostridiales, 275470	6.4	-0.397967	-1.31765	0.748761	0.982904	1	6.4	-1.25344	-2.38409	0.326862	0.76967	1	4.6	-0.855472	-1.80935	0.504354	0.993871	1	6.4	-0.779576	-1.71663	0.536979	0.90078	1	4.6	-0.381609	-1.30279	0.763018	0.963978	1	3.4	0.473863	1.38882	0.71565	0.993629	1
g__Allobaculum, 274912	0	0.301765	1.23265	0.912676	0.982904	1	0.4	2.47903	5.57521	0.276352	0.76967	1	0.4	2.17726	4.52295	0.274357	0.993871	1	0	0.694867	1.61874	0.796431	0.90078	1	0	0.393102	1.31321	0.872884	0.963978	1	0.4	-1.78416	-3.44418	0.350435	0.993629	1
f__S24-7, 274749	1.2	-0.297389	-1.22892	0.831974	0.982904	1	2.2	0.760783	1.69441	0.570817	0.946826	1	2.2	1.05817	2.08229	0.43238	0.993871	1	1.2	-0.0840813	-1.06001	0.952303	0.97459	1	1.2	0.213308	1.15934	0.879844	0.963978	1	2.2	-0.844864	-1.7961	0.532027	0.993629	1
f__Christensenellaceae, 274619	0.8	-0.883752	-1.84517	0.580147	0.982904	1	0.8	-0.2705	-1.20623	0.859385	0.946826	1	0.6	0.613252	1.5297	0.705647	0.993871	1	2.8	1.79698	3.47492	0.189912	0.739844	1	2.8	2.68073	6.41181	0.0696822	0.918974	1	2.8	2.06748	4.19154	0.14004	0.993629	1
s__gnavus, 274095	0	0.301765	1.23265	0.912655	0.982904	1	0.4	2.47868	5.57388	0.27626	0.76967	1	0.4	2.17692	4.52186	0.274229	0.993871	1	0	0.694867	1.61874	0.796381	0.90078	1	0	0.393102	1.31321	0.872847	0.963978	1	0.4	-1.78381	-3.44335	0.350305	0.993629	1
o__Clostridiales, 273954	11.2	-0.418284	-1.33634	0.758553	0.982904	1	11.2	-0.00401478	-1.00279	0.99764	0.998363	1	9.2	0.41427	1.33262	0.760521	0.993871	1	11.2	-0.11886	-1.08588	0.930374	0.962432	1	9.6	0.299424	1.23065	0.826035	0.963978	1	9.6	-0.114845	-1.08286	0.93264	0.993629	1
o__Clostridiales, 273364	0	0.30215	1.23298	0.915053	0.982904	1	0.6	2.9786	7.8822	0.200195	0.76967	1	0.6	2.67645	6.3928	0.190395	0.993871	1	0	0.697425	1.62161	0.801637	0.90078	1	0	0.395275	1.31519	0.876581	0.963978	1	0.6	-2.28117	-4.86073	0.245644	0.993629	1
g__Oscillospira, 272953	2	-0.684195	-1.6068	0.58764	0.982904	1	2	-0.161199	-1.11822	0.895975	0.952534	1	1.6	0.522996	1.43694	0.679841	0.993871	1	2	-3.61551	-12.2568	0.0756939	0.739844	1	1.2	-2.93131	-7.62803	0.154047	0.918974	1	1.6	-3.45431	-10.961	0.0902334	0.993629	1
o__Clostridiales, 272905	2.4	-0.511132	-1.42517	0.667365	0.982904	1	2.4	-0.931994	-1.90791	0.450425	0.862743	1	1.8	-0.420862	-1.33873	0.73637	0.993871	1	2.4	-1.04648	-2.06548	0.404694	0.794631	1	1.8	-0.535344	-1.44929	0.673562	0.963978	1	1.2	-0.114482	-1.08259	0.93055	0.993629	1
f__S24-7, 272850	1988.8	-0.211796	-1.15813	0.735521	0.982904	1	1988.8	-0.318684	-1.24719	0.611289	0.946826	1	1802.2	-0.106888	-1.0769	0.864643	0.993871	1	1988.8	-0.283657	-1.21728	0.651007	0.90078	1	1802.2	-0.0718609	-1.05107	0.90876	0.971539	1	1501	0.035027	1.02458	0.955455	0.997082	1
f__Coriobacteriaceae, 272555	0	0.301765	1.23265	0.912655	0.982904	1	0	0.437342	1.35411	0.874267	0.946826	1	0	0.135578	1.09853	0.957326	0.993871	1	0.4	2.59991	6.06248	0.252296	0.739844	1	0.4	2.29814	4.91825	0.246888	0.918974	1	0.4	2.16257	4.47711	0.280119	0.993629	1
o__Clostridiales, 272516	0	0.301765	1.23265	0.912676	0.982904	1	0.4	2.47895	5.57492	0.276369	0.76967	1	0.4	2.17719	4.52271	0.274376	0.993871	1	0	0.694867	1.61874	0.796431	0.90078	1	0	0.393102	1.31321	0.872884	0.963978	1	0.4	-1.78409	-3.444	0.350458	0.993629	1
o__Clostridiales, 272341	1.4	0.633926	1.55178	0.67031	0.982904	1	0.8	-0.518895	-1.43286	0.750935	0.946826	1	1.4	-1.15282	-2.22348	0.45914	0.993871	1	1.8	1.34139	2.53395	0.358638	0.794631	1	1.8	0.707463	1.63293	0.606637	0.963978	1	1.8	1.86028	3.63079	0.224264	0.993629	1
o__Clostridiales, 272328	2.2	0.174041	1.12821	0.883604	0.982904	1	1.8	-0.975313	-1.96607	0.45285	0.863792	1	2.2	-1.14935	-2.21814	0.367536	0.993871	1	1.8	-0.588522	-1.50371	0.642173	0.90078	1	2.2	-0.762563	-1.6965	0.539289	0.963978	1	1	0.386791	1.30748	0.774207	0.993629	1
o__Clostridiales, 272290	0	0.301765	1.23265	0.912655	0.982904	1	0.4	2.47877	5.57423	0.27624	0.76967	1	0.4	2.17701	4.52215	0.274206	0.993871	1	0	0.694867	1.61874	0.796381	0.90078	1	0	0.393102	1.31321	0.872847	0.963978	1	0.4	-1.78391	-3.44357	0.350277	0.993629	1
f__Lachnospiraceae, 272175	11.8	-0.272403	-1.20782	0.800226	0.982904	1	11.8	-0.509675	-1.42373	0.637978	0.946826	1	10.2	-0.237272	-1.17876	0.826599	0.993871	1	13.2	0.353929	1.27804	0.741216	0.90078	1	13.2	0.626332	1.54364	0.558907	0.963978	1	13.2	0.863604	1.81958	0.423237	0.993629	1
o__Clostridiales, 272072	1	0.239129	1.18028	0.859734	0.982904	1	0.8	-2.81108	-7.01811	0.196279	0.76967	1	1	-3.05021	-8.28333	0.155064	0.993871	1	0.8	-0.742731	-1.67334	0.624859	0.90078	1	1	-0.98186	-1.97501	0.505746	0.963978	1	0.4	2.06835	4.19407	0.35869	0.993629	1
f__Lachnospiraceae, 271804	4.8	-0.179027	-1.13212	0.879586	0.982904	1	4.8	0.0481529	1.03394	0.967438	0.981655	1	4.2	0.227179	1.17054	0.846932	0.993871	1	4.8	-0.255234	-1.19353	0.830683	0.915541	1	4	-0.0762072	-1.05424	0.94898	0.986854	1	4.2	-0.303387	-1.23404	0.798572	0.993629	1
o__Clostridiales, 271734	0.8	0.745197	1.6762	0.55696	0.982904	1	0.4	-1.94668	-3.85487	0.353768	0.76967	1	0.8	-2.69188	-6.46154	0.178619	0.993871	1	0.4	-1.68916	-3.22468	0.399722	0.794631	1	0.8	-2.43435	-5.40522	0.200848	0.918974	1	0	0.257525	1.19543	0.91904	0.993629	1
f__S24-7, 271131	1	-0.58681	-1.50192	0.654763	0.982904	1	1	-3.05801	-8.32826	0.147037	0.76967	1	0.6	-2.4712	-5.54507	0.247586	0.993871	1	1	-2.79546	-6.94252	0.165246	0.739844	1	0.6	-2.20865	-4.62243	0.279962	0.918974	1	0	0.262554	1.1996	0.920406	0.993629	1
f__Rikenellaceae, 270391	17	0.724667	1.65252	0.673978	0.982904	1	21	1.07844	2.11175	0.530989	0.946826	1	21	0.353774	1.2779	0.836307	0.993871	1	12	0.654258	1.57381	0.704473	0.90078	1	17	-0.070409	-1.05001	0.967267	0.99127	1	21	-0.424183	-1.34181	0.804606	0.993629	1
f__S24-7, 269873	94	-0.133636	-1.09705	0.87924	0.982904	1	94	-0.346646	-1.2716	0.693768	0.946826	1	82.8	-0.21301	-1.1591	0.808748	0.993871	1	94	-0.326907	-1.25432	0.710473	0.90078	1	82.8	-0.193271	-1.14335	0.826222	0.963978	1	61	0.0197386	1.01378	0.982127	0.99803	1
f__S24-7, 269673	6	-0.482617	-1.39728	0.654111	0.982904	1	6	-1.16528	-2.24277	0.294931	0.76967	1	4.4	-0.682666	-1.6051	0.541728	0.993871	1	6	-0.854329	-1.80792	0.438218	0.804533	1	4.4	-0.371712	-1.29389	0.73733	0.963978	1	2.6	0.310954	1.24053	0.785543	0.993629	1
f__Lachnospiraceae, 269657	44.6	-0.152014	-1.11112	0.845397	0.982904	1	44.6	-0.462869	-1.37828	0.554026	0.946826	1	43.4	-0.310855	-1.24044	0.690818	0.993871	1	44.6	-0.342863	-1.26827	0.661143	0.90078	1	43.4	-0.190849	-1.14144	0.807073	0.963978	1	32	0.120006	1.08674	0.878367	0.993629	1
o__YS2, 269386	3	-0.653639	-1.57313	0.655346	0.982904	1	3	-1.74107	-3.34283	0.262829	0.76967	1	1.8	-1.08743	-2.12495	0.488551	0.993871	1	3	-1.96199	-3.89598	0.217734	0.739844	1	1.8	-1.30835	-2.47657	0.41543	0.918974	1	0.8	-0.220915	-1.16547	0.895964	0.993629	1
f__Ruminococcaceae, 269156	4.4	-0.410111	-1.32879	0.68965	0.982904	1	4.4	0.00176808	1.00123	0.998614	0.998614	1	4.4	0.411879	1.33042	0.687375	0.993871	1	4.4	-0.625744	-1.54301	0.550953	0.90078	1	3.8	-0.215633	-1.16121	0.838053	0.963978	1	4.4	-0.627512	-1.5449	0.548526	0.993629	1
g__Lactobacillus, 269125	0	0.301765	1.23265	0.912655	0.982904	1	0	0.437342	1.35411	0.874267	0.946826	1	0	0.135578	1.09853	0.957326	0.993871	1	0.4	2.59991	6.06248	0.252296	0.739844	1	0.4	2.29814	4.91825	0.246888	0.918974	1	0.4	2.16257	4.47711	0.280119	0.993629	1
o__Clostridiales, 268220	0.8	-0.606239	-1.52229	0.652261	0.982904	1	0.8	-3.32226	-10.0023	0.122105	0.76967	1	0.8	-2.71602	-6.57057	0.211328	0.993871	1	0.8	-3.05557	-8.31414	0.137043	0.739844	1	0.8	-2.44933	-5.46162	0.238994	0.918974	1	0	0.26669	1.20304	0.920469	0.993629	1
g__Ruminococcus, 268043	2.6	-0.712344	-1.63846	0.560609	0.982904	1	2.6	-0.615159	-1.53173	0.61667	0.946826	1	1.6	0.097185	1.06968	0.938453	0.993871	1	2.8	0.1894	1.14029	0.872951	0.936882	1	2.8	0.901744	1.86832	0.458062	0.93716	1	2.8	0.804559	1.74661	0.509614	0.993629	1
f__Ruminococcaceae, 267451	9.2	-0.214275	-1.16012	0.87748	0.982904	1	9.2	0.209766	1.1565	0.879717	0.946826	1	9	0.42404	1.34168	0.759498	0.993871	1	9.2	-0.229812	-1.17268	0.869122	0.936882	1	9	-0.0155372	-1.01083	0.991105	0.997549	1	9	-0.439578	-1.35621	0.751807	0.993629	1
o__Clostridiales, 267373	29.4	-0.267858	-1.20402	0.75677	0.982904	1	29.4	-0.463402	-1.37879	0.593302	0.946826	1	26.2	-0.195543	-1.14516	0.821676	0.993871	1	29.4	-0.162439	-1.11918	0.851227	0.927817	1	26.2	0.105419	1.07581	0.903109	0.971539	1	25.4	0.300962	1.23197	0.729047	0.993629	1
s__gnavus, 266946	0	0.301783	1.23267	0.914021	0.982904	1	0	0.43733	1.3541	0.876214	0.946826	1	0	0.135546	1.09851	0.958106	0.993871	1	0.6	3.04633	8.26109	0.181573	0.739844	1	0.6	2.74455	6.70181	0.168685	0.918974	1	0.6	2.609	6.10082	0.194577	0.993629	1
g__Coprococcus, 266726	4.2	-0.246858	-1.18662	0.847363	0.982904	1	4.2	-0.677502	-1.59937	0.603855	0.946826	1	4.2	-0.430644	-1.34784	0.741428	0.993871	1	4.2	-0.00794047	-1.00552	0.995064	0.99723	1	4.2	0.238918	1.18011	0.85225	0.963978	1	4	0.669562	1.59059	0.608183	0.993629	1
f__Ruminococcaceae, 266720	3.6	-0.647233	-1.56616	0.679476	0.982904	1	3.6	0.268602	1.20464	0.861383	0.946826	1	3.6	0.915835	1.88666	0.555693	0.993871	1	3.6	-0.0794251	-1.0566	0.959227	0.977633	1	2.8	0.567808	1.48227	0.717505	0.963978	1	3.6	-0.348027	-1.27282	0.821352	0.993629	1
f__S24-7, 266546	0	0.301765	1.23265	0.912655	0.982904	1	0	0.437342	1.35411	0.874267	0.946826	1	0	0.135578	1.09853	0.957326	0.993871	1	0.4	2.59972	6.06167	0.252336	0.739844	1	0.4	2.29795	4.91759	0.246934	0.918974	1	0.4	2.16237	4.47651	0.280168	0.993629	1
f__S24-7, 266060	4.8	0.115317	1.08321	0.91443	0.982904	1	4.8	-1.03119	-2.0437	0.358733	0.76967	1	4.8	-1.1465	-2.21377	0.303156	0.993871	1	4.8	0.018251	1.01273	0.986557	0.993826	1	4.8	-0.0970662	-1.0696	0.927902	0.977592	1	3.8	1.04944	2.06972	0.350106	0.993629	1
o__Clostridiales, 265522	0	0.301765	1.23265	0.912676	0.982904	1	0.4	2.47903	5.57521	0.276352	0.76967	1	0.4	2.17726	4.52295	0.274357	0.993871	1	0	0.694867	1.61874	0.796431	0.90078	1	0	0.393102	1.31321	0.872884	0.963978	1	0.4	-1.78416	-3.44418	0.350435	0.993629	1
f__S24-7, 264657	5.4	0.461609	1.37708	0.704142	0.982904	1	3.2	-0.430283	-1.3475	0.73133	0.946826	1	5.4	-0.891892	-1.85561	0.46857	0.993871	1	3.2	-0.488656	-1.40314	0.698535	0.90078	1	5.4	-0.950265	-1.93223	0.443184	0.918974	1	2.6	-0.0583732	-1.04129	0.963514	0.997082	1
g__Dorea, 264437	0	0.301935	1.2328	0.915437	0.982904	1	0.4	2.46943	5.53823	0.30111	0.76967	1	0.4	2.16749	4.49241	0.305445	0.993871	1	0.8	3.42489	10.7398	0.138421	0.739844	1	0.8	3.12296	8.71173	0.12359	0.918974	1	0.8	0.955468	1.93921	0.467622	0.993629	1
o__Clostridiales, 264359	0	0.302868	1.23359	0.917161	0.982904	1	0	0.436623	1.35343	0.881307	0.946826	1	0	0.133755	1.09715	0.96055	0.993871	1	1.6	4.02885	16.3232	0.0883376	0.739844	1	1.6	3.72598	13.2322	0.0740235	0.918974	1	1.6	3.59223	12.0606	0.0875829	0.993629	1
f__S24-7, 264023	14.4	-0.436656	-1.35346	0.63247	0.982904	1	14.4	-0.755175	-1.68784	0.41223	0.816927	1	9.8	-0.318518	-1.24705	0.73005	0.993871	1	14.4	-0.569186	-1.48369	0.535934	0.90078	1	9.8	-0.13253	-1.09621	0.885665	0.966117	1	8	0.185988	1.1376	0.841415	0.993629	1
o__Clostridiales, 264014	7.2	-0.162376	-1.11913	0.850102	0.982904	1	7.2	-0.871853	-1.83001	0.32662	0.76967	1	6.6	-0.709477	-1.63521	0.42343	0.993871	1	7.2	-0.872507	-1.83084	0.328846	0.794631	1	6.6	-0.71013	-1.63595	0.425496	0.918974	1	3.6	-0.000653261	-1.00045	0.999433	0.999433	1
f__Lachnospiraceae, 263933	1.2	0.254796	1.19317	0.859964	0.982904	1	1.2	0.290852	1.22336	0.841475	0.946826	1	1.2	0.0360562	1.02531	0.979598	0.995377	1	0.8	-0.784696	-1.72273	0.62311	0.90078	1	1.2	-1.03949	-2.0555	0.50424	0.963978	1	1.2	-1.07555	-2.10752	0.492132	0.993629	1
f__Lachnospiraceae, 263907	1.2	0.817361	1.76218	0.565092	0.982904	1	1.2	0.923826	1.89714	0.516849	0.93917	1	1.2	0.106465	1.07659	0.934789	0.993871	1	0.6	-0.18351	-1.13564	0.907073	0.949666	1	1.2	-1.00087	-2.00121	0.493186	0.963978	1	1.2	-1.10734	-2.15447	0.449701	0.993629	1
f__S24-7, 263850	18	-0.281252	-1.21525	0.676094	0.982904	1	19.8	0.01378	1.0096	0.983628	0.989455	1	19.8	0.295032	1.22691	0.660455	0.993871	1	18	-0.754833	-1.68744	0.270528	0.739844	1	17.8	-0.473581	-1.38855	0.489438	0.963978	1	19.8	-0.768613	-1.70363	0.260812	0.993629	1
f__Lachnospiraceae, 263687	0	0.301765	1.23265	0.912655	0.982904	1	0	0.437342	1.35411	0.874267	0.946826	1	0	0.135578	1.09853	0.957326	0.993871	1	0.4	2.59972	6.06167	0.252336	0.739844	1	0.4	2.29795	4.91759	0.246934	0.918974	1	0.4	2.16237	4.47651	0.280168	0.993629	1
f__Desulfovibrionaceae, 263518	8.4	-0.309085	-1.23892	0.778901	0.982904	1	8	-0.15199	-1.1111	0.890192	0.9488	1	8.4	0.157094	1.11504	0.886596	0.993871	1	7.2	-0.563516	-1.47787	0.612612	0.90078	1	8.4	-0.254431	-1.19287	0.819267	0.963978	1	8	-0.411525	-1.33009	0.711701	0.993629	1
f__S24-7, 263479	21.6	0.278236	1.21271	0.700307	0.982904	1	19.8	0.346201	1.27121	0.632398	0.946826	1	21.6	0.0679654	1.04824	0.924511	0.993871	1	17.8	0.218238	1.16331	0.763843	0.90078	1	21.6	-0.0599975	-1.04246	0.933587	0.978207	1	19.8	-0.127963	-1.09275	0.859102	0.993629	1
s__gnavus, 263362	0	0.303062	1.23376	0.917693	0.982904	1	0.6	2.79688	6.94938	0.255784	0.76967	1	0.6	2.49382	5.63268	0.255802	0.993871	1	0.8	3.72491	13.2224	0.121214	0.739844	1	0.8	3.42185	10.7172	0.108138	0.918974	1	0.8	0.928029	1.90267	0.510957	0.993629	1
s__gnavus, 263138	9.6	0.614095	1.5306	0.552872	0.982904	1	6	-0.0104993	-1.0073	0.992035	0.995139	1	9.6	-0.624595	-1.54178	0.545015	0.993871	1	6	0.193199	1.1433	0.853899	0.929995	1	9.6	-0.420896	-1.33876	0.682634	0.963978	1	6	0.203699	1.15165	0.845654	0.993629	1
f__S24-7, 263111	68.6	-0.127849	-1.09266	0.888161	0.982904	1	68.6	-0.362091	-1.28529	0.690766	0.946826	1	57.8	-0.234242	-1.17629	0.796815	0.993871	1	68.6	-0.434921	-1.35184	0.633012	0.90078	1	57.8	-0.307072	-1.23719	0.735903	0.963978	1	47.8	-0.0728304	-1.05178	0.936316	0.996188	1
f__S24-7, 262752	203.6	-0.317083	-1.24581	0.683914	0.982904	1	203.6	-0.344724	-1.26991	0.658132	0.946826	1	162.8	-0.0276411	-1.01934	0.971698	0.994744	1	203.6	-0.63321	-1.55101	0.416693	0.79601	1	162.8	-0.316127	-1.24498	0.685141	0.963978	1	137.8	-0.288486	-1.22136	0.711455	0.993629	1
g__Oscillospira, 262677	5.4	-0.441972	-1.35846	0.644037	0.982904	1	5.4	-0.577507	-1.49227	0.550863	0.946826	1	4.2	-0.135535	-1.0985	0.889372	0.993871	1	5.4	-0.922092	-1.89486	0.352018	0.794631	1	4.2	-0.48012	-1.39486	0.630047	0.963978	1	3.6	-0.344585	-1.26979	0.73247	0.993629	1
o__Clostridiales, 262625	35.4	-0.339062	-1.26493	0.754877	0.982904	1	35.4	-0.47694	-1.39179	0.66105	0.946826	1	29.4	-0.137878	-1.10029	0.899159	0.993871	1	35.4	-0.518023	-1.43199	0.634253	0.90078	1	29.4	-0.178961	-1.13207	0.869482	0.963978	1	22.8	-0.0410835	-1.02889	0.969958	0.997082	1
o__Clostridiales, 262416	7.2	-0.374669	-1.29654	0.68339	0.982904	1	7.2	-0.936507	-1.91389	0.321517	0.76967	1	6.4	-0.561838	-1.47615	0.553267	0.993871	1	7.2	-1.65491	-3.14904	0.09556	0.739844	1	6.4	-1.28024	-2.4288	0.198529	0.918974	1	3.4	-0.718404	-1.64536	0.481136	0.993629	1
f__Lachnospiraceae, 262326	0	0.30215	1.23298	0.915011	0.982904	1	0.6	2.9786	7.8822	0.199867	0.76967	1	0.6	2.67645	6.3928	0.189987	0.993871	1	0	0.697425	1.62161	0.801536	0.90078	1	0	0.395275	1.31519	0.876507	0.963978	1	0.6	-2.28117	-4.86073	0.24517	0.993629	1
g__Coprococcus, 262227	2.2	-0.526815	-1.44075	0.66176	0.982904	1	2.2	-1.1411	-2.20549	0.371478	0.776342	1	1.6	-0.614281	-1.53079	0.635157	0.993871	1	2.2	-0.687968	-1.61101	0.578763	0.90078	1	1.6	-0.161153	-1.11818	0.898029	0.971539	1	1.2	0.453128	1.369	0.732794	0.993629	1
f__Ruminococcaceae, 261799	0	0.301765	1.23265	0.912655	0.982904	1	0	0.437342	1.35411	0.874267	0.946826	1	0	0.135578	1.09853	0.957326	0.993871	1	0.4	2.59991	6.06248	0.252296	0.739844	1	0.4	2.29814	4.91825	0.246888	0.918974	1	0.4	2.16257	4.47711	0.280119	0.993629	1
o__Clostridiales, 261744	7.4	-0.472415	-1.38743	0.654993	0.982904	1	7.4	-1.23416	-2.35244	0.25621	0.76967	1	5.6	-0.761745	-1.69554	0.485153	0.993871	1	7.4	-2.50764	-5.68688	0.0336816	0.553742	1	5.6	-2.03522	-4.09886	0.0857937	0.918974	1	3	-1.27348	-2.41743	0.293089	0.993629	1
o__Clostridiales, 261551	38.6	-0.245465	-1.18547	0.812093	0.982904	1	38.6	-0.942551	-1.92192	0.363847	0.771807	1	33.6	-0.697086	-1.62123	0.501768	0.993871	1	38.6	-1.04482	-2.06311	0.315054	0.779961	1	33.6	-0.799358	-1.74033	0.442016	0.918974	1	19.2	-0.102271	-1.07346	0.922049	0.993629	1
o__Clostridiales, 261511	2.4	0.498681	1.41292	0.685306	0.982904	1	2	0.230514	1.17325	0.854011	0.946826	1	2.4	-0.268167	-1.20428	0.82457	0.993871	1	1.8	-1.23122	-2.34765	0.381759	0.794631	1	2.4	-1.7299	-3.31704	0.206533	0.918974	1	2	-1.46173	-2.75439	0.292792	0.993629	1
o__Clostridiales, 261373	4.6	0.309643	1.2394	0.827229	0.982904	1	4.8	0.454374	1.37019	0.748811	0.946826	1	4.8	0.144731	1.10552	0.917699	0.993871	1	2.4	-0.19851	-1.14751	0.890727	0.941158	1	4.6	-0.508153	-1.42223	0.721747	0.963978	1	4.8	-0.652884	-1.57231	0.647339	0.993629	1
g__Ruminococcus, 261365	2.6	0.439061	1.35572	0.726025	0.982904	1	1.8	-3.72101	-13.1867	0.084924	0.76967	1	2.6	-4.16007	-17.8775	0.0515399	0.993871	1	1.8	-0.510649	-1.42469	0.702451	0.90078	1	2.6	-0.94971	-1.93148	0.464709	0.940742	1	1	3.21036	9.25583	0.142101	0.993629	1
f__S24-7, 261350	2.4	-0.0959414	-1.06876	0.921078	0.982904	1	2.8	0.220174	1.16487	0.81852	0.946826	1	2.8	0.316116	1.24497	0.739665	0.993871	1	2.8	0.379984	1.30133	0.69117	0.90078	1	2.8	0.475925	1.39081	0.615717	0.963978	1	2.8	0.15981	1.11714	0.864892	0.993629	1
f__Lachnospiraceae, 261334	0.8	0.702735	1.62759	0.652225	0.982904	1	1.2	1.47565	2.7811	0.326405	0.76967	1	1.2	0.772919	1.70872	0.568575	0.993871	1	0.4	-1.60918	-3.05078	0.462972	0.823075	1	0.8	-2.31191	-4.96542	0.2695	0.918974	1	1.2	-3.08483	-8.48453	0.132868	0.993629	1
f__Lachnospiraceae, 261277	0	0.301765	1.23265	0.913285	0.982904	1	0	0.437342	1.35411	0.875159	0.946826	1	0	0.135578	1.09853	0.95768	0.993871	1	0.8	3.39298	10.5048	0.127114	0.739844	1	0.8	3.09122	8.52214	0.109245	0.918974	1	0.8	2.95564	7.75775	0.12922	0.993629	1
f__Lachnospiraceae, 261265	3.6	0.62256	1.5396	0.587919	0.982904	1	2.8	0.490421	1.40485	0.672239	0.946826	1	3.6	-0.132139	-1.09592	0.906161	0.993871	1	6	1.39059	2.62186	0.220615	0.739844	1	6	0.76803	1.70294	0.483535	0.962193	1	6	0.900169	1.86628	0.416092	0.993629	1
g__Oscillospira, 261209	6.4	0.210801	1.15733	0.841848	0.982904	1	4	-0.566379	-1.4808	0.601879	0.946826	1	6.4	-0.77718	-1.71378	0.469	0.993871	1	4	-0.904461	-1.87184	0.413888	0.79601	1	6.4	-1.11526	-2.16634	0.308371	0.918974	1	3.6	-0.338081	-1.26407	0.763376	0.993629	1
f__Lachnospiraceae, 260666	0	0.302076	1.23292	0.914441	0.982904	1	0	0.437131	1.35391	0.87699	0.946826	1	0	0.135055	1.09813	0.958541	0.993871	1	0.6	3.05055	8.2853	0.184835	0.739844	1	0.6	2.74848	6.72008	0.17289	0.918974	1	0.6	2.61342	6.11954	0.198819	0.993629	1
g__Bacteroides, 260410	6.8	-0.225123	-1.16888	0.838066	0.982904	1	6.8	-0.741923	-1.6724	0.507361	0.93422	1	5.6	-0.5168	-1.43078	0.64394	0.993871	1	6.8	-0.719522	-1.64664	0.521339	0.885571	1	5.6	-0.494399	-1.40873	0.659196	0.963978	1	4.4	0.0224017	1.01565	0.984298	0.99803	1
o__Clostridiales, 260018	0	0.301765	1.23265	0.912655	0.982904	1	0.4	2.47877	5.57423	0.27624	0.76967	1	0.4	2.17701	4.52215	0.274206	0.993871	1	0	0.694867	1.61874	0.796381	0.90078	1	0	0.393102	1.31321	0.872847	0.963978	1	0.4	-1.78391	-3.44357	0.350277	0.993629	1
s__gnavus, 259983	0	0.301765	1.23265	0.912655	0.982904	1	0	0.437342	1.35411	0.874267	0.946826	1	0	0.135578	1.09853	0.957326	0.993871	1	0.4	2.59972	6.06167	0.252336	0.739844	1	0.4	2.29795	4.91759	0.246934	0.918974	1	0.4	2.16237	4.47651	0.280168	0.993629	1
o__Clostridiales, 259870	0	0.301765	1.23265	0.912655	0.982904	1	0	0.437342	1.35411	0.874267	0.946826	1	0	0.135578	1.09853	0.957326	0.993871	1	0.4	2.59991	6.06248	0.252296	0.739844	1	0.4	2.29814	4.91825	0.246888	0.918974	1	0.4	2.16257	4.47711	0.280119	0.993629	1
s__gnavus, 259781	1	0.777288	1.71391	0.619375	0.982904	1	0.6	0.40534	1.3244	0.802853	0.946826	1	1	-0.371948	-1.2941	0.803284	0.993871	1	1.8	2.05576	4.15761	0.169124	0.739844	1	1.8	1.27847	2.42581	0.344457	0.918974	1	1.8	1.65042	3.13924	0.245108	0.993629	1
o__Clostridiales, 259614	0	0.301765	1.23265	0.912676	0.982904	1	0.4	2.47895	5.57492	0.276369	0.76967	1	0.4	2.17719	4.52271	0.274376	0.993871	1	0	0.694867	1.61874	0.796431	0.90078	1	0	0.393102	1.31321	0.872884	0.963978	1	0.4	-1.78409	-3.444	0.350458	0.993629	1
f__S24-7, 259012	8.4	0.449584	1.36565	0.591277	0.982904	1	5.4	-0.575094	-1.48977	0.51132	0.935866	1	8.4	-1.02468	-2.03451	0.231766	0.993871	1	5.4	-1.51226	-2.85257	0.108606	0.739844	1	8.4	-1.96184	-3.8956	0.0339552	0.918974	1	3.6	-0.937166	-1.91476	0.328965	0.993629	1
g__Oscillospira, 258725	11.8	-0.31546	-1.24441	0.731026	0.982904	1	11.8	-0.938048	-1.91593	0.315747	0.76967	1	9.4	-0.622589	-1.53964	0.505815	0.993871	1	11.8	-0.96977	-1.95853	0.301818	0.758131	1	9.4	-0.65431	-1.57386	0.486329	0.963978	1	5.4	-0.0317212	-1.02223	0.973553	0.997082	1
f__Ruminococcaceae, 258550	5.8	0.220697	1.1653	0.776347	0.982904	1	5.6	0.373139	1.29517	0.631098	0.946826	1	5.8	0.152442	1.11145	0.840834	0.993871	1	4.6	0.18386	1.13592	0.815455	0.907448	1	5.8	-0.0368367	-1.02586	0.961844	0.989169	1	5.6	-0.189278	-1.14019	0.805877	0.993629	1
f__Lachnospiraceae, 258453	0	0.301765	1.23265	0.912655	0.982904	1	0.4	2.47877	5.57423	0.27624	0.76967	1	0.4	2.17701	4.52215	0.274206	0.993871	1	0	0.694867	1.61874	0.796381	0.90078	1	0	0.393102	1.31321	0.872847	0.963978	1	0.4	-1.78391	-3.44357	0.350277	0.993629	1
g__Ruminococcus, 238487	10	-0.131208	-1.09521	0.89677	0.982904	1	9.4	-1.03915	-2.05502	0.31561	0.76967	1	10	-0.907941	-1.87637	0.379526	0.993871	1	9.4	-1.70095	-3.25116	0.110895	0.739844	1	10	-1.56974	-2.96852	0.140399	0.918974	1	5.2	-0.661803	-1.58206	0.542915	0.993629	1
f__S24-7, 235017	473	-0.126725	-1.09181	0.825289	0.982904	1	473	-0.181016	-1.13368	0.752572	0.946826	1	466	-0.0542913	-1.03835	0.924658	0.993871	1	473	-0.219822	-1.16459	0.701898	0.90078	1	466	-0.0930974	-1.06666	0.871202	0.963978	1	397.2	-0.0388061	-1.02726	0.94613	0.997082	1
f__Rikenellaceae, 234443	0	0.302076	1.23292	0.914455	0.982904	1	0	0.437131	1.35391	0.87701	0.946826	1	0	0.135055	1.09813	0.958549	0.993871	1	0.6	3.05055	8.2853	0.184942	0.739844	1	0.6	2.74848	6.72008	0.173024	0.918974	1	0.6	2.61342	6.11954	0.198956	0.993629	1
o__Clostridiales, 233691	2.2	-0.869425	-1.82694	0.585356	0.982904	1	2.2	-0.409867	-1.32856	0.794137	0.946826	1	1.4	0.459559	1.37512	0.77566	0.993871	1	2.2	-0.658468	-1.57841	0.680273	0.90078	1	1.2	0.210958	1.15746	0.89759	0.971539	1	1.4	-0.248601	-1.18805	0.877801	0.993629	1
f__S24-7, 233587	8.6	-0.461629	-1.3771	0.597479	0.982904	1	8.6	-0.265105	-1.20172	0.761453	0.946826	1	7	0.196524	1.14593	0.822846	0.993871	1	8.6	-0.155492	-1.1138	0.85868	0.934466	1	7.4	0.306137	1.23639	0.727271	0.963978	1	7.4	0.109613	1.07894	0.900515	0.993629	1
f__S24-7, 233435	20.8	-0.423642	-1.34131	0.618199	0.982904	1	20.8	-0.30746	-1.23753	0.717699	0.946826	1	14.2	0.116182	1.08386	0.891519	0.993871	1	20.8	-0.441411	-1.35793	0.604996	0.90078	1	14.2	-0.0177693	-1.01239	0.983416	0.996175	1	13.2	-0.133951	-1.0973	0.875549	0.993629	1
o__Clostridiales, 233415	0	0.301765	1.23265	0.912655	0.982904	1	0	0.437342	1.35411	0.874267	0.946826	1	0	0.135578	1.09853	0.957326	0.993871	1	0.4	2.5999	6.06243	0.252299	0.739844	1	0.4	2.29813	4.91821	0.246891	0.918974	1	0.4	2.16255	4.47707	0.280122	0.993629	1
o__Clostridiales, 233411	0	0.301765	1.23265	0.912655	0.982904	1	0	0.437342	1.35411	0.874267	0.946826	1	0	0.135578	1.09853	0.957326	0.993871	1	0.4	2.59972	6.06167	0.252336	0.739844	1	0.4	2.29795	4.91759	0.246934	0.918974	1	0.4	2.16237	4.47651	0.280168	0.993629	1
f__Coriobacteriaceae, 232900	0	0.301765	1.23265	0.913649	0.982904	1	0	0.437342	1.35411	0.875676	0.946826	1	0	0.135578	1.09853	0.957885	0.993871	1	0.8	3.39316	10.5061	0.129595	0.739844	1	0.8	3.0914	8.52321	0.112257	0.918974	1	0.8	2.95582	7.75872	0.1324	0.993629	1
g__Adlercreutzia, 231510	0	0.301765	1.23265	0.915576	0.982904	1	0.8	3.29206	9.79512	0.155552	0.76967	1	0.8	2.9903	7.94639	0.141808	0.993871	1	0.8	3.39316	10.5061	0.143083	0.739844	1	0.8	3.0914	8.52321	0.12862	0.918974	1	0.8	0.101098	1.07259	0.932121	0.993629	1
g__Oscillospira, 231028	0	0.302376	1.23317	0.91536	0.982904	1	0	0.436933	1.35372	0.878473	0.946826	1	0	0.134557	1.09776	0.95925	0.993871	1	0.8	3.3808	10.4165	0.144514	0.739844	1	0.8	3.07843	8.44693	0.130187	0.918974	1	0.8	2.94387	7.69473	0.151301	0.993629	1
g__Ruminococcus, 229455	5	-0.103479	-1.07436	0.921695	0.982904	1	5.8	0.430889	1.34806	0.679318	0.946826	1	5.8	0.534368	1.44831	0.606401	0.993871	1	4.8	0.0104306	1.00726	0.992131	0.995334	1	5	0.11391	1.08216	0.913821	0.971539	1	5.8	-0.420458	-1.33835	0.686626	0.993629	1
f__S24-7, 228730	9.2	0.187759	1.13899	0.851119	0.982904	1	15.6	1.02352	2.03287	0.301621	0.76967	1	15.6	0.835762	1.7848	0.394437	0.993871	1	9	0.586387	1.50148	0.556907	0.90078	1	9.2	0.398628	1.31825	0.686849	0.963978	1	15.6	-0.437133	-1.35391	0.655295	0.993629	1
g__Bacteroides, 228601	37.2	-0.301234	-1.2322	0.695337	0.982904	1	37.2	-0.320641	-1.24889	0.677204	0.946826	1	36	-0.0194074	-1.01354	0.979901	0.995377	1	37.2	-0.220591	-1.16521	0.774609	0.90078	1	36	0.0806425	1.05749	0.916637	0.972143	1	32.4	0.10005	1.07181	0.896817	0.993629	1
f__S24-7, 217100	16.6	0.371052	1.2933	0.666263	0.982904	1	13.8	0.211455	1.15786	0.806722	0.946826	1	16.6	-0.159597	-1.11698	0.85196	0.993871	1	15	0.676796	1.59859	0.43127	0.799412	1	16.6	0.305744	1.23606	0.71933	0.963978	1	15	0.465341	1.38064	0.586178	0.993629	1
f__S24-7, 215495	59.8	0.180038	1.13291	0.840453	0.982904	1	45.4	-0.126701	-1.09179	0.887545	0.948637	1	59.8	-0.306739	-1.23691	0.731599	0.993871	1	48.6	0.262624	1.19966	0.769173	0.90078	1	59.8	0.082586	1.05891	0.926335	0.977287	1	48.6	0.389325	1.30978	0.663528	0.993629	1
o__Clostridiales, 215317	0	0.301765	1.23265	0.912987	0.982904	1	0.4	2.47896	5.57494	0.278869	0.76967	1	0.4	2.17719	4.52272	0.277569	0.993871	1	0	0.694867	1.61874	0.79718	0.90078	1	0	0.393102	1.31321	0.873441	0.963978	1	0.4	-1.78409	-3.44401	0.353962	0.993629	1
f__S24-7, 215214	5.6	0.560769	1.47506	0.667901	0.982904	1	4.8	0.344752	1.26993	0.793333	0.946826	1	5.6	-0.216018	-1.16152	0.867279	0.993871	1	5	0.626774	1.54411	0.632745	0.90078	1	5.6	0.0660042	1.04681	0.959137	0.989169	1	5	0.282022	1.2159	0.827893	0.993629	1
f__S24-7, 214699	38.6	-0.196775	-1.14613	0.798615	0.982904	1	38.6	-0.195273	-1.14494	0.80033	0.946826	1	37.4	0.00150142	1.00104	0.998447	0.999529	1	38.6	0.17587	1.12965	0.819503	0.908844	1	38.4	0.372645	1.29472	0.628537	0.963978	1	38.4	0.371144	1.29338	0.63029	0.993629	1
o__Clostridiales, 214116	1	-0.782031	-1.71955	0.583741	0.982904	1	1	-1.4352	-2.7042	0.354886	0.76967	1	0.8	-0.653169	-1.57262	0.683207	0.993871	1	1	-0.0436513	-1.03072	0.974729	0.987216	1	1	0.738379	1.6683	0.606406	0.963978	1	1	1.39155	2.6236	0.371385	0.993629	1
f__Ruminococcaceae, 213870	0	0.301765	1.23265	0.913045	0.982904	1	0.4	2.47896	5.57494	0.279336	0.76967	1	0.4	2.17719	4.52272	0.278164	0.993871	1	0	0.694867	1.61874	0.797319	0.90078	1	0	0.393102	1.31321	0.873545	0.963978	1	0.4	-1.78409	-3.44401	0.354614	0.993629	1
o__Clostridiales, 212732	2.8	0.156549	1.11462	0.892948	0.982904	1	2.6	-0.556038	-1.47023	0.646414	0.946826	1	2.8	-0.712587	-1.63874	0.55042	0.993871	1	2.6	-0.154702	-1.11319	0.896758	0.942483	1	2.8	-0.311251	-1.24078	0.790778	0.963978	1	2.2	0.401336	1.32073	0.742506	0.993629	1
f__S24-7, 211335	0	0.302209	1.23303	0.915056	0.982904	1	0	0.437042	1.35383	0.877942	0.946826	1	0	0.134833	1.09797	0.958971	0.993871	1	0.6	3.11326	8.65339	0.179985	0.739844	1	0.6	2.81106	7.01798	0.168266	0.918974	1	0.6	2.67622	6.3918	0.193353	0.993629	1
f__S24-7, 210665	11.4	-0.148601	-1.10849	0.890783	0.982904	1	16	0.415114	1.3334	0.700033	0.946826	1	16	0.563716	1.47807	0.60022	0.993871	1	10.2	-0.151881	-1.11102	0.888795	0.939836	1	11.4	-0.00327988	-1.00228	0.997587	0.998388	1	16	-0.566995	-1.48144	0.599462	0.993629	1
f__S24-7, 210068	4	-0.405488	-1.32454	0.725486	0.982904	1	4	-2.4334	-5.40163	0.0667236	0.76967	1	3	-2.02791	-4.07813	0.127752	0.993871	1	4	-1.96316	-3.89914	0.124914	0.739844	1	3	-1.55767	-2.94378	0.225029	0.918974	1	0.8	0.470239	1.38534	0.744155	0.993629	1
g__Coprococcus, 208571	5.4	-0.206379	-1.15379	0.793248	0.982904	1	5.4	-0.116283	-1.08394	0.882969	0.946826	1	5.2	0.0900957	1.06444	0.909033	0.993871	1	5.4	-0.0762812	-1.0543	0.923305	0.958343	1	5.2	0.130098	1.09437	0.869352	0.963978	1	5	0.0400019	1.02812	0.959792	0.997082	1
f__S24-7, 207288	14.6	-0.314194	-1.24332	0.675748	0.982904	1	14.8	-0.0554384	-1.03917	0.94105	0.97244	1	14.8	0.258755	1.19645	0.730192	0.993871	1	14.6	-0.311548	-1.24104	0.680076	0.90078	1	12.4	0.0026454	1.00184	0.997209	0.998388	1	14.8	-0.25611	-1.19425	0.73433	0.993629	1
f__S24-7, 206817	0	0.30314	1.23383	0.91774	0.982904	1	0	0.43646	1.35328	0.882278	0.946826	1	0	0.13332	1.09682	0.961032	0.993871	1	1.6	4.24055	18.9031	0.0753052	0.739844	1	1.6	3.93741	15.3207	0.0617614	0.918974	1	1.6	3.80409	13.9683	0.0734195	0.993629	1
f__S24-7, 206790	101.2	-0.146906	-1.10719	0.87378	0.982904	1	101.2	-0.367888	-1.29046	0.690984	0.946826	1	86.2	-0.220981	-1.16553	0.811225	0.993871	1	101.2	-0.11015	-1.07934	0.905229	0.948499	1	86.2	0.0367563	1.0258	0.968301	0.99127	1	70.2	0.257738	1.1956	0.780669	0.993629	1
f__S24-7, 206421	2	0.727665	1.65596	0.570049	0.982904	1	1.2	-3.30034	-9.85147	0.128719	0.76967	1	2	-4.02801	-16.3136	0.058957	0.993871	1	1.2	-1.14625	-2.21337	0.444459	0.807677	1	2	-1.87391	-3.66525	0.19347	0.918974	1	0.4	2.15409	4.45089	0.342742	0.993629	1
f__S24-7, 206324	6.6	0.114763	1.0828	0.908177	0.982904	1	6.8	0.432437	1.34951	0.66282	0.946826	1	6.8	0.317674	1.24632	0.746461	0.993871	1	6	0.103029	1.07403	0.918059	0.954699	1	6.6	-0.0117335	-1.00817	0.990566	0.997549	1	6.8	-0.329407	-1.2565	0.739109	0.993629	1
o__Clostridiales, 206213	0	0.301765	1.23265	0.912655	0.982904	1	0.4	2.47877	5.57423	0.27624	0.76967	1	0.4	2.17701	4.52215	0.274206	0.993871	1	0	0.694867	1.61874	0.796381	0.90078	1	0	0.393102	1.31321	0.872847	0.963978	1	0.4	-1.78391	-3.44357	0.350277	0.993629	1
g__Lactobacillus, 202131	0	0.301765	1.23265	0.912655	0.982904	1	0.4	2.47868	5.57388	0.27626	0.76967	1	0.4	2.17692	4.52186	0.274229	0.993871	1	0	0.694867	1.61874	0.796381	0.90078	1	0	0.393102	1.31321	0.872847	0.963978	1	0.4	-1.78381	-3.44335	0.350305	0.993629	1
f__Rikenellaceae, 199534	1.6	0.141304	1.1029	0.919135	0.982904	1	1.2	-1.36009	-2.56702	0.392287	0.79835	1	1.6	-1.5014	-2.83117	0.337111	0.993871	1	1.2	-0.193509	-1.14354	0.893179	0.94246	1	1.6	-0.334812	-1.26121	0.812644	0.963978	1	1	1.16658	2.2448	0.468177	0.993629	1
g__Coprococcus, 199137	0	0.301765	1.23265	0.914438	0.982904	1	0.4	2.47896	5.57494	0.290541	0.76967	1	0.4	2.17719	4.52272	0.292362	0.993871	1	0.4	2.59972	6.06167	0.266716	0.739844	1	0.4	2.29795	4.91759	0.265176	0.918974	1	0.4	0.120759	1.08731	0.929557	0.993629	1
f__S24-7, 198644	0	0.301765	1.23265	0.912655	0.982904	1	0.4	2.47868	5.57388	0.27626	0.76967	1	0.4	2.17692	4.52186	0.274229	0.993871	1	0	0.694867	1.61874	0.796381	0.90078	1	0	0.393102	1.31321	0.872847	0.963978	1	0.4	-1.78381	-3.44335	0.350305	0.993629	1
o__Clostridiales, 198406	0	0.301765	1.23265	0.912676	0.982904	1	0.4	2.47903	5.57521	0.276352	0.76967	1	0.4	2.17726	4.52295	0.274357	0.993871	1	0	0.694867	1.61874	0.796431	0.90078	1	0	0.393102	1.31321	0.872884	0.963978	1	0.4	-1.78416	-3.44418	0.350435	0.993629	1
f__S24-7, 197980	95.8	0.348155	1.27293	0.711538	0.982904	1	77.2	0.120374	1.08702	0.89835	0.954324	1	95.8	-0.227781	-1.17103	0.808696	0.993871	1	76.2	0.393734	1.31379	0.675944	0.90078	1	95.8	0.0455789	1.0321	0.961347	0.989169	1	77.2	0.27336	1.20862	0.771498	0.993629	1
o__Clostridiales, 197790	6.8	-0.62515	-1.54237	0.708189	0.982904	1	6.8	-0.414238	-1.33259	0.804006	0.946826	1	4.2	0.210912	1.15742	0.899793	0.993871	1	6.8	-1.15375	-2.22492	0.494832	0.856344	1	3.8	-0.528601	-1.44253	0.755256	0.963978	1	4.2	-0.739513	-1.66961	0.662581	0.993629	1
f__S24-7, 197644	5.2	-0.485835	-1.4004	0.623734	0.982904	1	5.2	-1.14752	-2.21533	0.264779	0.76967	1	3.8	-0.661688	-1.58193	0.523105	0.993871	1	5.6	0.448049	1.36419	0.644489	0.90078	1	5.6	0.933884	1.91041	0.339937	0.918974	1	5.6	1.59557	3.02214	0.116929	0.993629	1
g__Oscillospira, 197099	0.8	-0.809597	-1.75272	0.578853	0.982904	1	0.8	-2.71408	-6.56174	0.205737	0.76967	1	0.4	-1.90448	-3.74374	0.387958	0.993871	1	0.8	0.236413	1.17806	0.860079	0.935251	1	0.8	1.04601	2.06481	0.466624	0.940742	1	0.8	2.95049	7.73012	0.166024	0.993629	1
f__S24-7, 196733	3	0.158132	1.11584	0.907298	0.982904	1	5.4	0.958935	1.94387	0.473861	0.891556	1	5.4	0.800803	1.74207	0.544408	0.993871	1	4.4	1.09883	2.14181	0.411595	0.79601	1	4.4	0.940701	1.91946	0.476214	0.950459	1	5.4	0.139898	1.10183	0.914356	0.993629	1
f__S24-7, 196385	30.2	-0.361055	-1.28436	0.6456	0.982904	1	30.2	-0.257385	-1.19531	0.743157	0.946826	1	23.2	0.10367	1.0745	0.895072	0.993871	1	30.2	0.0193992	1.01354	0.980267	0.989942	1	25.2	0.380454	1.30175	0.627868	0.963978	1	25.2	0.276784	1.21149	0.724483	0.993629	1
f__S24-7, 196289	1	-0.194588	-1.1444	0.901736	0.982904	1	1	0.224638	1.16848	0.885241	0.947688	1	1	0.419226	1.33721	0.78716	0.993871	1	2.2	1.17691	2.26092	0.436175	0.803144	1	2.2	1.3715	2.58739	0.362965	0.918974	1	2.2	0.952272	1.93492	0.521942	0.993629	1
f__Lachnospiraceae, 196212	0	0.301765	1.23265	0.912655	0.982904	1	0	0.437342	1.35411	0.874267	0.946826	1	0	0.135578	1.09853	0.957326	0.993871	1	0.4	2.5999	6.06243	0.252299	0.739844	1	0.4	2.29813	4.91821	0.246891	0.918974	1	0.4	2.16255	4.47707	0.280122	0.993629	1
f__Lachnospiraceae, 196165	4	0.232633	1.17498	0.822147	0.982904	1	5.8	0.9688	1.95721	0.340968	0.76967	1	5.8	0.736167	1.66574	0.45996	0.993871	1	5.8	1.0054	2.00749	0.32393	0.790367	1	5.8	0.772762	1.70854	0.438834	0.918974	1	5.8	0.0365952	1.02569	0.970212	0.997082	1
g__Ruminococcus, 195982	0.4	0.202006	1.1503	0.906994	0.982904	1	1.8	1.99676	3.99103	0.206987	0.76967	1	1.8	1.79475	3.46956	0.233995	0.993871	1	2.4	2.31963	4.99203	0.140056	0.739844	1	2.4	2.11762	4.33977	0.15724	0.918974	1	2.4	0.322865	1.25081	0.807491	0.993629	1
o__Clostridiales, 195622	1.4	-0.586347	-1.50144	0.696273	0.982904	1	1.4	-0.618187	-1.53494	0.683805	0.946826	1	1	-0.0318399	-1.02232	0.983514	0.995727	1	1.4	-0.43905	-1.35571	0.771417	0.90078	1	1	0.147297	1.10749	0.92352	0.975062	1	1	0.179137	1.13221	0.907979	0.993629	1
o__Clostridiales, 195433	0	0.301996	1.23285	0.914539	0.982904	1	0	0.437185	1.35396	0.87708	0.946826	1	0	0.135189	1.09824	0.958541	0.993871	1	0.6	3.04813	8.27138	0.185782	0.739844	1	0.6	2.74613	6.70916	0.174004	0.918974	1	0.6	2.61094	6.10903	0.199996	0.993629	1
o__Clostridiales, 194878	0.6	0.382676	1.30376	0.800664	0.982904	1	0.4	0.113638	1.08195	0.942763	0.97244	1	0.6	-0.269037	-1.205	0.856528	0.993871	1	0.4	0.210625	1.15719	0.894006	0.94246	1	0.6	-0.172051	-1.12666	0.907828	0.971539	1	0.4	0.0969868	1.06954	0.95025	0.997082	1
o__Clostridiales, 194559	0	0.301765	1.23265	0.912655	0.982904	1	0.4	2.47877	5.57423	0.27624	0.76967	1	0.4	2.17701	4.52215	0.274206	0.993871	1	0	0.694867	1.61874	0.796381	0.90078	1	0	0.393102	1.31321	0.872847	0.963978	1	0.4	-1.78391	-3.44357	0.350277	0.993629	1
o__Clostridiales, 194277	0	0.301765	1.23265	0.912655	0.982904	1	0	0.437342	1.35411	0.874267	0.946826	1	0	0.135578	1.09853	0.957326	0.993871	1	0.4	2.5999	6.06243	0.252299	0.739844	1	0.4	2.29813	4.91821	0.246891	0.918974	1	0.4	2.16255	4.47707	0.280122	0.993629	1
f__S24-7, 194043	2	0.391237	1.31152	0.778684	0.982904	1	1.6	-0.0331722	-1.02326	0.981383	0.988541	1	2	-0.424409	-1.34202	0.759879	0.993871	1	1.6	-0.0950219	-1.06808	0.9471	0.971973	1	2	-0.486259	-1.40081	0.728242	0.963978	1	1.6	-0.0618497	-1.0438	0.96547	0.997082	1
o__Clostridiales, 193756	0	0.301765	1.23265	0.912655	0.982904	1	0.4	2.47868	5.57388	0.27626	0.76967	1	0.4	2.17692	4.52186	0.274229	0.993871	1	0	0.694867	1.61874	0.796381	0.90078	1	0	0.393102	1.31321	0.872847	0.963978	1	0.4	-1.78381	-3.44335	0.350305	0.993629	1
g__Bacteroides, 193591	0.6	-0.493899	-1.40825	0.752419	0.982904	1	0.8	0.456591	1.37229	0.75309	0.946826	1	0.8	0.950489	1.93253	0.526864	0.993871	1	0.6	-2.06284	-4.17807	0.330563	0.794631	1	0.4	-1.56894	-2.96686	0.466594	0.940742	1	0.8	-2.51943	-5.73355	0.224356	0.993629	1
o__Clostridiales, 192475	0.6	0.385284	1.30612	0.799149	0.982904	1	0.8	0.894979	1.85958	0.543133	0.946826	1	0.8	0.509695	1.42375	0.709797	0.993871	1	1.2	1.48575	2.80062	0.297077	0.752776	1	1.2	1.10046	2.14424	0.404142	0.918974	1	1.2	0.590769	1.50605	0.64187	0.993629	1
o__Clostridiales, 192365	0	0.301996	1.23285	0.914567	0.982904	1	0	0.437185	1.35396	0.87712	0.946826	1	0	0.135189	1.09824	0.958557	0.993871	1	0.6	3.04813	8.27138	0.186001	0.739844	1	0.6	2.74613	6.70916	0.174277	0.918974	1	0.6	2.61094	6.10903	0.200275	0.993629	1
o__Clostridiales, 191753	1.4	-0.453449	-1.36931	0.734747	0.982904	1	1.4	-0.75949	-1.69289	0.5853	0.946826	1	1	-0.306041	-1.23631	0.828362	0.993871	1	1.4	-1.23937	-2.36095	0.402514	0.794631	1	1	-0.785918	-1.72419	0.600086	0.963978	1	0.6	-0.479877	-1.39462	0.756417	0.993629	1
f__Ruminococcaceae, 191606	0	0.302488	1.23327	0.916891	0.982904	1	1.6	4.08013	16.9138	0.0814085	0.76967	1	1.6	3.77764	13.7146	0.0667442	0.993871	1	0.4	2.59984	6.06221	0.288372	0.749455	1	0.4	2.29736	4.91556	0.292323	0.918974	1	1.6	-1.48028	-2.79004	0.275018	0.993629	1
f__Ruminococcaceae, 191216	0	0.301765	1.23265	0.91311	0.982904	1	0.4	2.47896	5.57494	0.279856	0.76967	1	0.4	2.17719	4.52272	0.278826	0.993871	1	0	0.694867	1.61874	0.797474	0.90078	1	0	0.393102	1.31321	0.87366	0.963978	1	0.4	-1.78409	-3.44401	0.355338	0.993629	1
s__gnavus, 191205	0.8	0.728419	1.65682	0.603019	0.982904	1	0.4	-1.96021	-3.8912	0.368983	0.774416	1	0.8	-2.68863	-6.44702	0.1979	0.993871	1	0.4	0.202029	1.15032	0.893625	0.94246	1	0.8	-0.52639	-1.44032	0.701214	0.963978	1	0.4	2.16224	4.4761	0.317623	0.993629	1
f__S24-7, 190673	18.6	0.165454	1.12152	0.818865	0.982904	1	14.2	-0.305551	-1.23589	0.676088	0.946826	1	18.6	-0.471005	-1.38607	0.516261	0.993871	1	14.2	-0.405098	-1.32418	0.581629	0.90078	1	18.6	-0.570552	-1.48509	0.434155	0.918974	1	11.6	-0.0995474	-1.07144	0.892738	0.993629	1
o__Clostridiales, 190219	0	0.302076	1.23292	0.914469	0.982904	1	0	0.437131	1.35391	0.87703	0.946826	1	0	0.135055	1.09813	0.958556	0.993871	1	0.6	3.05055	8.2853	0.18505	0.739844	1	0.6	2.74848	6.72008	0.173158	0.918974	1	0.6	2.61342	6.11954	0.199094	0.993629	1
f__S24-7, 190207	0	0.301828	1.23271	0.914501	0.982904	1	0.4	2.48376	5.59354	0.290166	0.76967	1	0.4	2.18194	4.53762	0.292012	0.993871	1	0.4	2.6003	6.06412	0.267272	0.739844	1	0.4	2.29847	4.91936	0.265901	0.918974	1	0.4	0.116535	1.08413	0.932241	0.993629	1
o__Clostridiales, 190035	0	0.301765	1.23265	0.914414	0.982904	1	0.4	2.47895	5.57492	0.290352	0.76967	1	0.4	2.17719	4.52271	0.292124	0.993871	1	0.4	2.59972	6.06167	0.266525	0.739844	1	0.4	2.29795	4.91759	0.264935	0.918974	1	0.4	0.120763	1.08731	0.929475	0.993629	1
g__AF12, 190026	1.2	0.201502	1.14989	0.891932	0.982904	1	0.8	0.0523941	1.03698	0.972365	0.983042	1	1.2	-0.149107	-1.10888	0.919235	0.993871	1	1	0.446836	1.36305	0.763393	0.90078	1	1.2	0.245334	1.18537	0.864873	0.963978	1	1	0.394442	1.31443	0.788692	0.993629	1
g__Oscillospira, 189884	3	-0.490859	-1.40528	0.673257	0.982904	1	3	-2.03861	-4.10849	0.124824	0.76967	1	2.2	-1.54775	-2.9236	0.247617	0.993871	1	3	-1.91125	-3.76135	0.148502	0.739844	1	2.2	-1.42039	-2.67658	0.286741	0.918974	1	0.6	0.127358	1.09229	0.93137	0.993629	1
f__S24-7, 189127	5.2	0.596614	1.51216	0.593641	0.982904	1	3.8	0.257213	1.19517	0.820212	0.946826	1	5.2	-0.339401	-1.26523	0.758728	0.993871	1	3.6	0.0152943	1.01066	0.989337	0.995334	1	5.2	-0.581319	-1.49622	0.603056	0.963978	1	3.8	-0.241918	-1.18256	0.830698	0.993629	1
o__Clostridiales, 188457	18.4	-0.358056	-1.2817	0.614607	0.982904	1	16.8	-0.442293	-1.35876	0.53579	0.946826	1	18.4	-0.0842364	-1.06013	0.906252	0.993871	1	16.8	-0.87749	-1.83718	0.225338	0.739844	1	18.4	-0.519434	-1.43339	0.473517	0.950459	1	15	-0.435197	-1.3521	0.549871	0.993629	1
f__S24-7, 188399	0	0.301765	1.23265	0.914468	0.982904	1	0.4	2.47868	5.57388	0.290849	0.76967	1	0.4	2.17692	4.52186	0.292744	0.993871	1	0.4	2.59991	6.06248	0.266924	0.739844	1	0.4	2.29814	4.91825	0.265443	0.918974	1	0.4	0.121227	1.08766	0.92939	0.993629	1
f__S24-7, 187959	5.2	0.51231	1.42633	0.606489	0.982904	1	3	-0.61017	-1.52644	0.560293	0.946826	1	5.2	-1.12248	-2.17721	0.272144	0.993871	1	4.2	0.362003	1.28521	0.719306	0.90078	1	5.2	-0.150307	-1.10981	0.878192	0.963978	1	4.2	0.972172	1.96179	0.347349	0.993629	1
o__Clostridiales, 187768	4.8	-0.198204	-1.14727	0.87374	0.982904	1	6	0.29457	1.22652	0.812006	0.946826	1	6	0.492774	1.40715	0.690236	0.993871	1	4.2	-0.369419	-1.29183	0.769726	0.90078	1	4.8	-0.171215	-1.12601	0.891907	0.969861	1	6	-0.663989	-1.58446	0.595663	0.993629	1
g__Ruminococcus, 187400	0	0.302122	1.23296	0.91562	0.982904	1	0.4	2.4599	5.5018	0.30514	0.76967	1	0.4	2.15778	4.46228	0.310314	0.993871	1	0.6	3.04636	8.26125	0.194731	0.739844	1	0.6	2.74424	6.70036	0.185106	0.918974	1	0.6	0.586456	1.50155	0.671443	0.993629	1
o__Clostridiales, 187222	1.4	-0.33411	-1.2606	0.768175	0.982904	1	1.4	-3.54185	-11.6467	0.0847415	0.76967	1	1.2	-3.20774	-9.23904	0.119558	0.993871	1	1.4	-0.929096	-1.90408	0.453569	0.813479	1	1.2	-0.594986	-1.51046	0.633982	0.963978	1	0.6	2.61276	6.11672	0.217993	0.993629	1
o__Clostridiales, 186707	1	-0.301679	-1.23258	0.821662	0.982904	1	1	-2.95653	-7.76255	0.167136	0.76967	1	0.8	-2.65485	-6.29782	0.216177	0.993871	1	1	-0.798749	-1.73959	0.581999	0.90078	1	0.8	-0.49707	-1.41134	0.733612	0.963978	1	0.4	2.15778	4.46229	0.330763	0.993629	1
o__Clostridiales, 185989	140.4	-0.357783	-1.28146	0.766493	0.982904	1	140.4	-0.817986	-1.76294	0.497518	0.924841	1	109.2	-0.460203	-1.37574	0.702724	0.993871	1	140.4	-1.29409	-2.45222	0.28372	0.747743	1	109.2	-0.936303	-1.91362	0.438004	0.918974	1	67.6	-0.4761	-1.39098	0.693541	0.993629	1
f__S24-7, 185550	74.6	-0.204085	-1.15196	0.80277	0.982904	1	74.6	-0.198291	-1.14734	0.808353	0.946826	1	64.4	0.00579386	1.00402	0.994344	0.999402	1	74.6	-0.158736	-1.11631	0.846088	0.924405	1	64.4	0.0453491	1.03193	0.955763	0.987956	1	57.8	0.0395552	1.0278	0.961429	0.997082	1
s__gnavus, 185338	0	0.301765	1.23265	0.912655	0.982904	1	0	0.437342	1.35411	0.874267	0.946826	1	0	0.135578	1.09853	0.957326	0.993871	1	0.4	2.60017	6.06358	0.252242	0.739844	1	0.4	2.29841	4.91914	0.246826	0.918974	1	0.4	2.16283	4.47792	0.280052	0.993629	1
f__Clostridiaceae, 185222	16.2	0.477807	1.39263	0.576916	0.982904	1	11.6	0.146256	1.10669	0.865491	0.946826	1	16.2	-0.331552	-1.25837	0.697046	0.993871	1	14.4	0.639943	1.55827	0.455646	0.814033	1	16.2	0.162136	1.11894	0.848001	0.963978	1	14.4	0.493688	1.40804	0.562743	0.993629	1
f__S24-7, 184517	0	0.301765	1.23265	0.912655	0.982904	1	0.4	2.47868	5.57388	0.27626	0.76967	1	0.4	2.17692	4.52186	0.274229	0.993871	1	0	0.694867	1.61874	0.796381	0.90078	1	0	0.393102	1.31321	0.872847	0.963978	1	0.4	-1.78381	-3.44335	0.350305	0.993629	1
f__S24-7, 184381	26.2	-0.351239	-1.27566	0.683221	0.982904	1	26.2	-0.163848	-1.12027	0.848987	0.946826	1	25.8	0.187391	1.1387	0.8277	0.993871	1	26.2	0.105459	1.07584	0.902345	0.946914	1	25.2	0.456698	1.3724	0.595366	0.963978	1	25.8	0.269307	1.20523	0.754091	0.993629	1
f__Lachnospiraceae, 183805	1	0.153936	1.1126	0.911738	0.982904	1	1.2	0.479889	1.39464	0.727156	0.946826	1	1.2	0.325954	1.25349	0.807596	0.993871	1	2.2	1.20328	2.30262	0.367894	0.794631	1	2.2	1.04934	2.06958	0.418953	0.918974	1	2.2	0.723387	1.65105	0.573183	0.993629	1
g__Blautia, 183651	0	0.301765	1.23265	0.912655	0.982904	1	0	0.437342	1.35411	0.874267	0.946826	1	0	0.135578	1.09853	0.957326	0.993871	1	0.4	2.59972	6.06167	0.252336	0.739844	1	0.4	2.29795	4.91759	0.246934	0.918974	1	0.4	2.16237	4.47651	0.280168	0.993629	1
s__fragilis, 183603	0	0.301765	1.23265	0.912655	0.982904	1	0	0.437342	1.35411	0.874267	0.946826	1	0	0.135578	1.09853	0.957326	0.993871	1	0.4	2.59991	6.06248	0.252296	0.739844	1	0.4	2.29814	4.91825	0.246888	0.918974	1	0.4	2.16257	4.47711	0.280119	0.993629	1
g__Oscillospira, 183545	0.8	-0.771163	-1.70665	0.597743	0.982904	1	0.8	-0.589578	-1.50481	0.685987	0.946826	1	0.4	0.181585	1.13413	0.906267	0.993871	1	0.8	-2.41514	-5.33372	0.239735	0.739844	1	0.4	-1.64398	-3.12526	0.436917	0.918974	1	0.4	-1.82556	-3.54445	0.387478	0.993629	1
o__Clostridiales, 183467	0	0.301765	1.23265	0.912655	0.982904	1	0.4	2.47868	5.57388	0.27626	0.76967	1	0.4	2.17692	4.52186	0.274229	0.993871	1	0	0.694867	1.61874	0.796381	0.90078	1	0	0.393102	1.31321	0.872847	0.963978	1	0.4	-1.78381	-3.44335	0.350305	0.993629	1
o__Clostridiales, 182470	0	0.301765	1.23265	0.912676	0.982904	1	0.4	2.47903	5.57521	0.276352	0.76967	1	0.4	2.17726	4.52295	0.274357	0.993871	1	0	0.694867	1.61874	0.796431	0.90078	1	0	0.393102	1.31321	0.872884	0.963978	1	0.4	-1.78416	-3.44418	0.350435	0.993629	1
g__Oscillospira, 182033	8.2	0.18658	1.13806	0.830878	0.982904	1	6.8	-0.861372	-1.81676	0.34511	0.76967	1	8.2	-1.04795	-2.06759	0.24518	0.993871	1	6.8	-0.728414	-1.65682	0.423966	0.79601	1	8.2	-0.914994	-1.88556	0.309526	0.918974	1	3.6	0.132958	1.09654	0.887285	0.993629	1
g__Parabacteroides, 180731	43.4	0.545927	1.45996	0.614128	0.982904	1	41	0.576894	1.49163	0.594345	0.946826	1	43.4	0.0309673	1.0217	0.977104	0.995377	1	25.8	0.248461	1.18794	0.818941	0.908844	1	43.4	-0.297466	-1.22898	0.783211	0.963978	1	41	-0.328433	-1.25565	0.7614	0.993629	1
o__Clostridiales, 180671	6.8	-0.471485	-1.38654	0.686846	0.982904	1	6.8	0.157812	1.11559	0.891633	0.9488	1	6.4	0.629296	1.54681	0.588615	0.993871	1	6.8	-0.44872	-1.36483	0.702982	0.90078	1	5.2	0.0227646	1.0159	0.984633	0.996175	1	6.4	-0.606532	-1.52259	0.604446	0.993629	1
f__S24-7, 180471	3.8	-0.203258	-1.1513	0.860431	0.982904	1	3.8	0.195272	1.14494	0.864883	0.946826	1	3.6	0.39853	1.31816	0.727901	0.993871	1	3.8	-0.327826	-1.25512	0.779829	0.90078	1	3	-0.124568	-1.09018	0.915259	0.971539	1	3.6	-0.523098	-1.43704	0.652676	0.993629	1
g__Oscillospira, 180235	2.6	-0.142727	-1.10399	0.899473	0.982904	1	4	0.629532	1.54706	0.568917	0.946826	1	4	0.772259	1.70794	0.482567	0.993871	1	2.6	-0.40624	-1.32523	0.726194	0.90078	1	2.6	-0.263513	-1.2004	0.819526	0.963978	1	4	-1.03577	-2.05021	0.359698	0.993629	1
o__Clostridiales, 180065	0	0.301765	1.23265	0.912655	0.982904	1	0.4	2.47877	5.57423	0.27624	0.76967	1	0.4	2.17701	4.52215	0.274206	0.993871	1	0	0.694867	1.61874	0.796381	0.90078	1	0	0.393102	1.31321	0.872847	0.963978	1	0.4	-1.78391	-3.44357	0.350277	0.993629	1
f__Lachnospiraceae, 179907	2.6	-0.527406	-1.44134	0.651739	0.982904	1	2.6	-0.591203	-1.5065	0.61729	0.946826	1	2	-0.0637965	-1.04521	0.957545	0.993871	1	2.6	0.0629192	1.04458	0.956386	0.976178	1	2.6	0.590325	1.50559	0.612713	0.963978	1	2.6	0.654122	1.57366	0.579611	0.993629	1
o__Clostridiales, 179703	3.2	-0.438462	-1.35516	0.700395	0.982904	1	3.2	-4.60519	-24.3388	0.0280209	0.76967	1	2.6	-4.16673	-17.9601	0.0473371	0.993871	1	3.2	-2.06928	-4.19676	0.11664	0.739844	1	2.6	-1.63082	-3.09688	0.218898	0.918974	1	0.6	2.53591	5.79943	0.249761	0.993629	1
s__gnavus, 178026	0	0.30215	1.23298	0.914997	0.982904	1	0.6	2.9786	7.8822	0.199761	0.76967	1	0.6	2.67645	6.3928	0.189855	0.993871	1	0	0.697425	1.62161	0.801504	0.90078	1	0	0.395275	1.31519	0.876483	0.963978	1	0.6	-2.28117	-4.86073	0.245017	0.993629	1
f__S24-7, 177414	1.4	-0.241576	-1.18228	0.844583	0.982904	1	1.8	0.419831	1.33777	0.72563	0.946826	1	1.8	0.661407	1.58162	0.580737	0.993871	1	2	0.680706	1.60292	0.566355	0.90078	1	2	0.922283	1.89511	0.437682	0.918974	1	2	0.260875	1.19821	0.820685	0.993629	1
f__S24-7, 177371	0	0.301765	1.23265	0.912655	0.982904	1	0	0.437342	1.35411	0.874267	0.946826	1	0	0.135578	1.09853	0.957326	0.993871	1	0.4	2.60006	6.0631	0.252266	0.739844	1	0.4	2.29829	4.91875	0.246853	0.918974	1	0.4	2.16271	4.47756	0.280081	0.993629	1
f__S24-7, 177205	1.2	-0.413253	-1.33169	0.750161	0.982904	1	1.2	-1.42317	-2.68175	0.33192	0.76967	1	1	-1.00992	-2.0138	0.495684	0.993871	1	1.2	-1.14478	-2.21112	0.423769	0.79601	1	1	-0.731522	-1.66039	0.613196	0.963978	1	0.4	0.278398	1.21285	0.861901	0.993629	1
g__Dehalobacterium, 176868	9.2	-0.167972	-1.12348	0.87546	0.982904	1	9.2	-1.18085	-2.2671	0.284437	0.76967	1	8.2	-1.01287	-2.01793	0.357714	0.993871	1	9.2	-0.752073	-1.68421	0.491035	0.851909	1	8.2	-0.584101	-1.4991	0.592099	0.963978	1	4.6	0.428773	1.34609	0.702113	0.993629	1
o__Clostridiales, 176853	0	0.301884	1.23275	0.91422	0.982904	1	0.6	2.92111	7.57428	0.202774	0.76967	1	0.6	2.61922	6.1442	0.192253	0.993871	1	0	0.695659	1.61962	0.799984	0.90078	1	0	0.393775	1.31383	0.87547	0.963978	1	0.6	-2.22545	-4.67657	0.24851	0.993629	1
f__Ruminococcaceae, 176582	10	-0.145751	-1.10631	0.890125	0.982904	1	8.4	-0.276827	-1.21153	0.793974	0.946826	1	10	-0.131076	-1.09511	0.901392	0.993871	1	8.4	-0.733875	-1.6631	0.494065	0.85609	1	10	-0.588124	-1.50329	0.582926	0.963978	1	8.4	-0.457047	-1.37273	0.670987	0.993629	1
o__Clostridiales, 176486	0.6	-0.512197	-1.42622	0.716258	0.982904	1	0.6	-2.4465	-5.45092	0.2474	0.76967	1	0.4	-1.9343	-3.82194	0.368367	0.993871	1	0.6	-2.18491	-4.54698	0.279685	0.745647	1	0.4	-1.67271	-3.18814	0.41634	0.918974	1	0	0.261591	1.1988	0.91964	0.993629	1
f__S24-7, 175712	0.6	0.181562	1.13411	0.898079	0.982904	1	0.4	-2.11058	-4.31865	0.328419	0.76967	1	0.6	-2.29214	-4.89783	0.279354	0.993871	1	0.4	-1.84851	-3.60127	0.371283	0.794631	1	0.6	-2.03007	-4.08424	0.316087	0.918974	1	0	0.262072	1.1992	0.919682	0.993629	1
f__S24-7, 175458	33.8	-0.33943	-1.26526	0.647118	0.982904	1	33.8	-0.419647	-1.3376	0.572367	0.946826	1	27.2	-0.0802172	-1.05718	0.914104	0.993871	1	33.8	0.118015	1.08524	0.873331	0.936882	1	29.6	0.457445	1.37311	0.536811	0.963978	1	29.6	0.537663	1.45162	0.46896	0.993629	1
f__Rikenellaceae, 175375	3.2	-0.405915	-1.32493	0.683889	0.982904	1	3.2	-0.594625	-1.51008	0.558642	0.946826	1	2.8	-0.188711	-1.13974	0.853822	0.993871	1	3.2	0.0286673	1.02007	0.976868	0.988318	1	3.2	0.434582	1.35152	0.662732	0.963978	1	3.2	0.623293	1.54039	0.539637	0.993629	1
f__S24-7, 175272	4.8	-0.451618	-1.36757	0.644074	0.982904	1	4.8	-0.478176	-1.39298	0.627263	0.946826	1	3.8	-0.0265579	-1.01858	0.978628	0.995377	1	4.8	-1.44595	-2.72442	0.167686	0.739844	1	3.8	-0.994333	-1.99216	0.345606	0.918974	1	3.4	-0.967776	-1.95582	0.361693	0.993629	1
f__S24-7, 175155	2.6	0.178602	1.13179	0.895365	0.982904	1	2.2	-1.08763	-2.12525	0.451066	0.862774	1	2.6	-1.26623	-2.40533	0.374469	0.993871	1	2.2	-0.643587	-1.56221	0.649293	0.90078	1	2.6	-0.822189	-1.76809	0.556304	0.963978	1	1.2	0.444045	1.36041	0.764213	0.993629	1
o__Clostridiales, 175078	0	0.30215	1.23298	0.915003	0.982904	1	0.6	2.9786	7.8822	0.199808	0.76967	1	0.6	2.67645	6.3928	0.189912	0.993871	1	0	0.697425	1.62161	0.801518	0.90078	1	0	0.395275	1.31519	0.876493	0.963978	1	0.6	-2.28117	-4.86073	0.245083	0.993629	1
o__Clostridiales, 175077	53	-0.397113	-1.31687	0.7797	0.982904	1	53	-0.878029	-1.83786	0.536979	0.946826	1	44	-0.480916	-1.39563	0.7353	0.993871	1	53	-1.03806	-2.05346	0.465898	0.826529	1	44	-0.640945	-1.55935	0.65262	0.963978	1	26	-0.160028	-1.11731	0.910669	0.993629	1
o__Clostridiales, 174770	1	0.253732	1.19229	0.848721	0.982904	1	0.8	-2.7645	-6.79514	0.200399	0.76967	1	1	-3.01824	-8.10176	0.155922	0.993871	1	0.8	-2.50027	-5.65792	0.226316	0.739844	1	1	-2.754	-6.74587	0.175555	0.918974	1	0	0.264231	1.201	0.920593	0.993629	1
f__S24-7, 174500	4.2	0.477452	1.39228	0.656185	0.982904	1	3	0.00472004	1.00328	0.996562	0.998007	1	4.2	-0.472732	-1.38773	0.658037	0.993871	1	3.4	0.34474	1.26992	0.750862	0.90078	1	4.2	-0.132711	-1.09635	0.900197	0.971539	1	3.4	0.34002	1.26577	0.753194	0.993629	1
f__Lachnospiraceae, 173830	0	0.301765	1.23265	0.915776	0.982904	1	1	3.57323	11.9028	0.121734	0.76967	1	1	3.27147	9.65628	0.106186	0.993871	1	0.4	2.5999	6.06243	0.277511	0.745217	1	0.4	2.29813	4.91821	0.278712	0.918974	1	1	-0.973335	-1.96337	0.454102	0.993629	1
f__Ruminococcaceae, 172329	5	-0.315775	-1.24468	0.780665	0.982904	1	4.2	-0.837159	-1.78653	0.470111	0.888072	1	5	-0.521384	-1.43533	0.653206	0.993871	1	4.2	-0.326736	-1.25417	0.77497	0.90078	1	5	-0.0109613	-1.00763	0.992357	0.997549	1	3.8	0.510423	1.42447	0.6624	0.993629	1
g__Dorea, 171718	0	0.301765	1.23265	0.912655	0.982904	1	0.4	2.47868	5.57388	0.27626	0.76967	1	0.4	2.17692	4.52186	0.274229	0.993871	1	0	0.694867	1.61874	0.796381	0.90078	1	0	0.393102	1.31321	0.872847	0.963978	1	0.4	-1.78381	-3.44335	0.350305	0.993629	1
f__Ruminococcaceae, 170926	3.4	0.17608	1.12981	0.905535	0.982904	1	2	-1.12786	-2.18535	0.471224	0.888072	1	3.4	-1.30394	-2.46903	0.399956	0.993871	1	2.2	-0.0175756	-1.01226	0.990662	0.995334	1	3.4	-0.193656	-1.14366	0.896226	0.971539	1	2.2	1.11029	2.15889	0.478427	0.993629	1
f__Lachnospiraceae, 170561	0.8	0.762004	1.69585	0.600551	0.982904	1	1.6	1.79459	3.46917	0.194617	0.76967	1	1.6	1.03259	2.04569	0.398704	0.993871	1	0.4	0.204488	1.15228	0.896098	0.942483	1	0.8	-0.557517	-1.47173	0.695901	0.963978	1	1.6	-1.5901	-3.01071	0.239953	0.993629	1
g__Odoribacter, 170335	5.8	-0.603243	-1.51913	0.617549	0.982904	1	5.8	-1.22927	-2.34449	0.320579	0.76967	1	4.8	-0.626031	-1.54331	0.615332	0.993871	1	5.8	-1.7057	-3.26187	0.179715	0.739844	1	4.8	-1.10246	-2.1472	0.388864	0.918974	1	2.4	-0.476426	-1.39129	0.715535	0.993629	1
g__Lactobacillus, 166911	0	0.301765	1.23265	0.912655	0.982904	1	0	0.437342	1.35411	0.874267	0.946826	1	0	0.135578	1.09853	0.957326	0.993871	1	0.4	2.59991	6.06248	0.252296	0.739844	1	0.4	2.29814	4.91825	0.246888	0.918974	1	0.4	2.16257	4.47711	0.280119	0.993629	1
o__Clostridiales, 166869	0.6	-0.542445	-1.45644	0.721335	0.982904	1	0.6	-0.407672	-1.32654	0.789383	0.946826	1	0.4	0.134773	1.09792	0.932066	0.993871	1	0.6	-0.231639	-1.17417	0.878074	0.937057	1	0.4	0.310806	1.2404	0.842605	0.963978	1	0.4	0.176033	1.12977	0.910755	0.993629	1
f__Lachnospiraceae, 165430	10.4	0.537216	1.45117	0.610579	0.982904	1	9.8	0.616433	1.53308	0.559429	0.946826	1	10.4	0.0792171	1.05644	0.93928	0.993871	1	14.4	1.09648	2.13832	0.296822	0.752776	1	14.4	0.559263	1.47352	0.58887	0.963978	1	14.4	0.480046	1.39479	0.64309	0.993629	1
g__Oscillospira, 165046	0	0.301765	1.23265	0.913876	0.982904	1	0.8	3.29205	9.79502	0.14329	0.76967	1	0.8	2.99028	7.9463	0.126795	0.993871	1	0	0.694867	1.61874	0.799316	0.90078	1	0	0.393102	1.31321	0.875024	0.963978	1	0.8	-2.59718	-6.05103	0.166299	0.993629	1
f__Lachnospiraceae, 164237	0	0.301765	1.23265	0.912655	0.982904	1	0	0.437342	1.35411	0.874267	0.946826	1	0	0.135578	1.09853	0.957326	0.993871	1	0.4	2.60017	6.06358	0.252242	0.739844	1	0.4	2.29841	4.91914	0.246826	0.918974	1	0.4	2.16283	4.47792	0.280052	0.993629	1
f__Ruminococcaceae, 158649	0.6	-0.473114	-1.3881	0.75734	0.982904	1	0.6	-0.37407	-1.296	0.80842	0.946826	1	0.4	0.099044	1.07106	0.950182	0.993871	1	0.6	0.126157	1.09138	0.931888	0.963277	1	0.6	0.599271	1.51495	0.693463	0.963978	1	0.6	0.500227	1.41444	0.744033	0.993629	1
o__Clostridiales, 157546	0.6	-0.487898	-1.4024	0.756498	0.982904	1	1	0.651589	1.5709	0.6507	0.946826	1	1	1.13949	2.20303	0.444193	0.993871	1	0.6	-2.04959	-4.1399	0.334679	0.794631	1	0.4	-1.5617	-2.95201	0.469439	0.945036	1	1	-2.70118	-6.50335	0.190407	0.993629	1
g__Coprococcus, 147195	0	0.301884	1.23275	0.914257	0.982904	1	0.6	2.92111	7.57428	0.203063	0.76967	1	0.6	2.61922	6.1442	0.192616	0.993871	1	0	0.695659	1.61962	0.800073	0.90078	1	0	0.393775	1.31383	0.875536	0.963978	1	0.6	-2.22545	-4.67657	0.248931	0.993629	1
f__S24-7, 134762	7.2	0.159945	1.11724	0.871889	0.982904	1	6.8	-0.855765	-1.80972	0.40324	0.808193	1	7.2	-1.01571	-2.0219	0.317024	0.993871	1	6.8	-0.0643166	-1.04559	0.948837	0.972778	1	7.2	-0.224261	-1.16818	0.8214	0.963978	1	5.2	0.791448	1.73081	0.440188	0.993629	1
o__Clostridiales, 133719	2.4	0.550047	1.46413	0.693592	0.982904	1	1.2	-0.662737	-1.58308	0.65632	0.946826	1	2.4	-1.21278	-2.31785	0.401931	0.993871	1	1.8	0.560728	1.47501	0.690407	0.90078	1	2.4	0.0106814	1.00743	0.993747	0.998083	1	1.8	1.22347	2.33507	0.401458	0.993629	1
o__Clostridiales, 132929	0	0.301765	1.23265	0.912676	0.982904	1	0.4	2.47903	5.57521	0.276352	0.76967	1	0.4	2.17726	4.52295	0.274357	0.993871	1	0	0.694867	1.61874	0.796431	0.90078	1	0	0.393102	1.31321	0.872884	0.963978	1	0.4	-1.78416	-3.44418	0.350435	0.993629	1
o__RF32, 114111	253.2	-0.474995	-1.38991	0.786718	0.982904	1	209	-0.722727	-1.6503	0.680598	0.946826	1	253.2	-0.247732	-1.18734	0.887794	0.993871	1	138.4	-0.917277	-1.88855	0.601391	0.90078	1	253.2	-0.442282	-1.35875	0.801137	0.963978	1	209	-0.19455	-1.14437	0.911789	0.993629	1
f__Helicobacteraceae, 100344	27.4	-0.361075	-1.28438	0.645855	0.982904	1	27.4	-0.689717	-1.61297	0.382859	0.790327	1	24.2	-0.328642	-1.25583	0.677789	0.993871	1	27.4	-0.564551	-1.47893	0.474986	0.833489	1	24.2	-0.203476	-1.15147	0.79696	0.963978	1	18.2	0.125166	1.09063	0.87497	0.993629	1
g__Brachyspira, 84927	3.8	-0.653696	-1.57319	0.614848	0.982904	1	4.2	0.356195	1.28005	0.778718	0.946826	1	4.2	1.00989	2.01376	0.431737	0.993871	1	3.8	-0.948144	-1.92939	0.47637	0.833953	1	2.2	-0.294448	-1.22642	0.827019	0.963978	1	4.2	-1.30434	-2.46971	0.322004	0.993629	1
f__Rikenellaceae, 1517779	12.2	0.593939	1.50936	0.716342	0.982904	1	7	-0.152767	-1.1117	0.926053	0.97244	1	12.2	-0.746705	-1.67796	0.647894	0.993871	1	6	0.0175899	1.01227	0.991469	0.995334	1	12.2	-0.576349	-1.49107	0.724316	0.963978	1	7	0.170357	1.12534	0.917543	0.993629	1
g__Oscillospira, 1569569	110.6	-0.576416	-1.49114	0.671541	0.982904	1	77.2	-1.06986	-2.09923	0.431598	0.839864	1	110.6	-0.493447	-1.4078	0.716865	0.993871	1	77.2	-1.01519	-2.02117	0.455545	0.814033	1	110.6	-0.438774	-1.35545	0.747118	0.963978	1	76.2	0.0546732	1.03862	0.967975	0.997082	1
g__Coprococcus, 1678333	0	0.301765	1.23265	0.912655	0.982904	1	0	0.437342	1.35411	0.874267	0.946826	1	0	0.135578	1.09853	0.957326	0.993871	1	0.4	2.59972	6.06167	0.252336	0.739844	1	0.4	2.29795	4.91759	0.246934	0.918974	1	0.4	2.16237	4.47651	0.280168	0.993629	1
s__C21_c20, 1684221	197.8	-0.372299	-1.29441	0.664667	0.982904	1	197.4	-0.344037	-1.2693	0.688778	0.946826	1	197.8	0.028262	1.01978	0.973755	0.994744	1	197.4	-0.394779	-1.31474	0.645886	0.90078	1	197.8	-0.02248	-1.0157	0.979128	0.996175	1	171.6	-0.050742	-1.0358	0.952916	0.997082	1
g__Enterococcus, 1756274	0	0.301765	1.23265	0.912655	0.982904	1	0	0.437342	1.35411	0.874267	0.946826	1	0	0.135578	1.09853	0.957326	0.993871	1	0.4	2.59991	6.06248	0.252296	0.739844	1	0.4	2.29814	4.91825	0.246888	0.918974	1	0.4	2.16257	4.47711	0.280119	0.993629	1
f__S24-7, 2212505	108.8	-0.0938581	-1.06722	0.900952	0.982904	1	101.4	-0.106074	-1.0763	0.888188	0.948637	1	108.8	-0.0122161	-1.0085	0.987075	0.995727	1	101.4	0.0576587	1.04078	0.939074	0.967807	1	108.8	0.151517	1.11074	0.840731	0.963978	1	99.8	0.163733	1.12018	0.828156	0.993629	1
f__Erysipelotrichaceae, 2216525	7	0.338127	1.26411	0.701193	0.982904	1	4.6	-0.791764	-1.73119	0.395651	0.799623	1	7	-1.12989	-2.18842	0.216694	0.993871	1	4.6	-1.00676	-2.00939	0.290339	0.749455	1	7	-1.34488	-2.5401	0.150322	0.918974	1	2.6	-0.214992	-1.1607	0.826899	0.993629	1
s__distasonis, 2309802	12.4	0.531319	1.44525	0.654813	0.982904	1	9.8	0.253693	1.19225	0.831767	0.946826	1	12.4	-0.277627	-1.2122	0.814267	0.993871	1	8.8	0.46227	1.37771	0.698349	0.90078	1	12.4	-0.0690491	-1.04903	0.953351	0.987956	1	9.8	0.208578	1.15555	0.86042	0.993629	1
g__Bifidobacterium, 825808	0	0.301765	1.23265	0.913036	0.982904	1	0.8	3.29179	9.79329	0.13739	0.76967	1	0.8	2.99003	7.9449	0.119561	0.993871	1	0	0.694867	1.61874	0.797297	0.90078	1	0	0.393102	1.31321	0.873529	0.963978	1	0.8	-2.59693	-6.04996	0.157399	0.993629	1
f__Rikenellaceae, 1107652	0.6	0.355081	1.27906	0.812222	0.982904	1	0.8	0.887531	1.85001	0.540324	0.946826	1	0.8	0.53245	1.44638	0.693902	0.993871	1	0.4	-1.693	-3.23328	0.425465	0.79601	1	0.6	-2.04808	-4.13555	0.320025	0.918974	1	0.8	-2.58053	-5.98159	0.202991	0.993629	1
s__distasonis, 2497335	0	0.302712	1.23346	0.917297	0.982904	1	1	3.62409	12.3299	0.128209	0.76967	1	1	3.32138	9.99619	0.114837	0.993871	1	0.8	3.38268	10.4301	0.159053	0.739844	1	0.8	3.07996	8.45593	0.147905	0.918974	1	1	-0.241414	-1.18215	0.853453	0.993629	1
s__gnavus, 2686384	0	0.301765	1.23265	0.912718	0.982904	1	0.4	2.47895	5.57492	0.276704	0.76967	1	0.4	2.17719	4.52271	0.274804	0.993871	1	0	0.694867	1.61874	0.796531	0.90078	1	0	0.393102	1.31321	0.872959	0.963978	1	0.4	-1.78409	-3.444	0.350929	0.993629	1
o__Clostridiales, 1108378	22.2	0.27789	1.21242	0.690777	0.982904	1	16.2	-0.124697	-1.09028	0.85971	0.946826	1	22.2	-0.402587	-1.32188	0.564494	0.993871	1	17.2	0.226502	1.16999	0.747039	0.90078	1	22.2	-0.0513879	-1.03626	0.941092	0.982349	1	17.2	0.351199	1.27562	0.617068	0.993629	1
o__Clostridiales, 1112139	0.6	0.406089	1.32509	0.791765	0.982904	1	0.4	0.0923263	1.06609	0.954333	0.972739	1	0.6	-0.313763	-1.24295	0.835854	0.993871	1	0.6	0.631124	1.54877	0.682282	0.90078	1	0.6	0.225035	1.16881	0.875736	0.963978	1	0.6	0.538798	1.45276	0.722639	0.993629	1
g__Bilophila, 2897325	4.8	-0.239759	-1.1808	0.837308	0.982904	1	4	-0.754634	-1.6872	0.525905	0.945836	1	4.8	-0.514874	-1.42887	0.664996	0.993871	1	4	-1.10254	-2.14733	0.362685	0.794631	1	4.8	-0.862781	-1.81854	0.476001	0.950459	1	3.6	-0.347907	-1.27271	0.777619	0.993629	1
f__Ruminococcaceae, 1110253	8	-0.329173	-1.25629	0.788945	0.982904	1	8	0.135897	1.09878	0.91161	0.962487	1	7.4	0.46507	1.38038	0.704258	0.993871	1	8	-2.15367	-4.44959	0.102246	0.739844	1	6.4	-1.8245	-3.54184	0.16657	0.918974	1	7.4	-2.28957	-4.8891	0.0813837	0.993629	1
f__S24-7, 3172943	7.8	0.174684	1.12872	0.85837	0.982904	1	6.6	0.0615677	1.0436	0.95012	0.972495	1	7.8	-0.113117	-1.08156	0.907634	0.993871	1	6.2	0.0909354	1.06506	0.926518	0.959162	1	7.8	-0.083749	-1.05977	0.931673	0.978207	1	6.6	0.0293677	1.02056	0.976144	0.997082	1
f__S24-7, 3172945	0	0.301765	1.23265	0.916312	0.982904	1	1.6	4.18879	18.2369	0.0689673	0.76967	1	1.6	3.88702	14.7948	0.0540675	0.993871	1	0.8	3.39297	10.5047	0.148381	0.739844	1	0.8	3.0912	8.52207	0.135043	0.918974	1	1.6	-0.795819	-1.73606	0.491172	0.993629	1
o__Clostridiales, 827376	2.8	0.237936	1.1793	0.856913	0.982904	1	1.6	-1.89446	-3.71783	0.21641	0.76967	1	2.8	-2.1324	-4.38446	0.158389	0.993871	1	1.6	-0.0753296	-1.0536	0.955455	0.97595	1	2.8	-0.313266	-1.24252	0.813093	0.963978	1	1.6	1.81913	3.52869	0.236632	0.993629	1
s__fragilis, 3474081	0	0.301765	1.23265	0.912655	0.982904	1	0	0.437342	1.35411	0.874267	0.946826	1	0	0.135578	1.09853	0.957326	0.993871	1	0.4	2.60006	6.0631	0.252266	0.739844	1	0.4	2.29829	4.91875	0.246853	0.918974	1	0.4	2.16271	4.47756	0.280081	0.993629	1
o__Clostridiales, 3529330	10.4	-0.704561	-1.62965	0.57214	0.982904	1	10.4	-0.696782	-1.62089	0.577227	0.946826	1	5.8	0.00777934	1.00541	0.99506	0.999402	1	10.4	-0.835674	-1.78469	0.505595	0.867362	1	5.8	-0.131112	-1.09514	0.917235	0.972143	1	5	-0.138892	-1.10106	0.912531	0.993629	1
o__Clostridiales, 1109559	0	0.301765	1.23265	0.912655	0.982904	1	0.4	2.47868	5.57388	0.27626	0.76967	1	0.4	2.17692	4.52186	0.274229	0.993871	1	0	0.694867	1.61874	0.796381	0.90078	1	0	0.393102	1.31321	0.872847	0.963978	1	0.4	-1.78381	-3.44335	0.350305	0.993629	1
s__gnavus, 3647536	0	0.301765	1.23265	0.912655	0.982904	1	0.4	2.47877	5.57423	0.27624	0.76967	1	0.4	2.17701	4.52215	0.274206	0.993871	1	0	0.694867	1.61874	0.796381	0.90078	1	0	0.393102	1.31321	0.872847	0.963978	1	0.4	-1.78391	-3.44357	0.350277	0.993629	1
o__Clostridiales, 631564	1	0.162027	1.11886	0.912053	0.982904	1	0.8	-2.63695	-6.22015	0.237683	0.76967	1	1	-2.79898	-6.95947	0.204276	0.993871	1	1.4	0.911809	1.8814	0.522209	0.88596	1	1.4	0.749782	1.68154	0.586905	0.963978	1	1.4	3.54876	11.7026	0.103082	0.993629	1
f__Ruminococcaceae, 4056429	12	0.159402	1.11682	0.903455	0.982904	1	8.8	-0.224381	-1.16828	0.865109	0.946826	1	12	-0.383783	-1.30476	0.770493	0.993871	1	7.8	-0.700244	-1.62478	0.599004	0.90078	1	12	-0.859645	-1.81459	0.516918	0.963978	1	8.8	-0.475863	-1.39075	0.721118	0.993629	1
f__Lachnospiraceae, 743911	0	0.301765	1.23265	0.912655	0.982904	1	0	0.437342	1.35411	0.874267	0.946826	1	0	0.135578	1.09853	0.957326	0.993871	1	0.4	2.5999	6.06243	0.252299	0.739844	1	0.4	2.29813	4.91821	0.246891	0.918974	1	0.4	2.16255	4.47707	0.280122	0.993629	1
g__Ruminococcus, 827592	2.4	-0.598564	-1.51421	0.638188	0.982904	1	2.4	-2.07827	-4.223	0.1589	0.76967	1	1.6	-1.4797	-2.78891	0.322162	0.993871	1	2.4	-0.510053	-1.4241	0.691635	0.90078	1	1.6	0.0885111	1.06327	0.946055	0.984553	1	1.4	1.56821	2.96537	0.297645	0.993629	1
f__Ruminococcaceae, 4302396	0	0.301884	1.23275	0.914294	0.982904	1	0.6	2.92111	7.57428	0.203352	0.76967	1	0.6	2.61922	6.1442	0.192978	0.993871	1	0	0.695659	1.61962	0.800162	0.90078	1	0	0.393775	1.31383	0.875601	0.963978	1	0.6	-2.22545	-4.67657	0.249352	0.993629	1
g__Parabacteroides, 4329571	0	0.302461	1.23325	0.91604	0.982904	1	0.8	3.17632	9.03995	0.177251	0.76967	1	0.8	2.87385	7.33021	0.166202	0.993871	1	0.4	2.66607	6.347	0.26791	0.739844	1	0.4	2.36361	5.14658	0.268236	0.918974	1	0.8	-0.510241	-1.42429	0.70893	0.993629	1
f__Ruminococcaceae, 4341886	0	0.302076	1.23292	0.914483	0.982904	1	0	0.437131	1.35391	0.87705	0.946826	1	0	0.135055	1.09813	0.958564	0.993871	1	0.6	3.05055	8.2853	0.185156	0.739844	1	0.6	2.74848	6.72008	0.17329	0.918974	1	0.6	2.61342	6.11954	0.199229	0.993629	1
o__Clostridiales, 4355739	3.2	-0.13099	-1.09505	0.914994	0.982904	1	2.4	-0.278289	-1.21276	0.822577	0.946826	1	3.2	-0.147299	-1.10749	0.905122	0.993871	1	2.4	0.00229571	1.00159	0.998514	0.999238	1	3.2	0.133286	1.09679	0.913533	0.971539	1	2.4	0.280585	1.21469	0.821184	0.993629	1
g__Oscillospira, 4357315	0	0.302116	1.23295	0.915487	0.982904	1	0.4	2.44033	5.42766	0.308381	0.76967	1	0.4	2.13822	4.40217	0.313958	0.993871	1	0.6	3.04646	8.2618	0.193669	0.739844	1	0.6	2.74434	6.70083	0.183791	0.918974	1	0.6	0.606125	1.52216	0.659916	0.993629	1
f__Lachnospiraceae, 4364243	13.4	-0.379492	-1.30088	0.670752	0.982904	1	13.4	-1.68799	-3.22208	0.0699176	0.76967	1	10.8	-1.3085	-2.47684	0.160702	0.993871	1	13.4	-1.04665	-2.06573	0.251572	0.739844	1	10.8	-0.667156	-1.58794	0.465631	0.940742	1	5.8	0.641342	1.55978	0.500597	0.993629	1
s__distasonis, 4365130	0	0.302919	1.23364	0.917457	0.982904	1	1	3.39174	10.4958	0.158461	0.76967	1	1	3.08882	8.50803	0.147343	0.993871	1	0.6	3.17563	9.03566	0.190508	0.739844	1	0.6	2.87271	7.3244	0.182553	0.918974	1	1	-0.216114	-1.1616	0.874954	0.993629	1
g__Fusobacterium, 4372795	0	0.302609	1.23337	0.915986	0.982904	1	0	0.436784	1.35358	0.879496	0.946826	1	0	0.134175	1.09747	0.959746	0.993871	1	0.8	3.51596	11.4395	0.13249	0.739844	1	0.8	3.21335	9.27499	0.118164	0.918974	1	0.8	3.07917	8.45129	0.137602	0.993629	1
g__Prevotella, 4378740	80.6	0.541547	1.45553	0.721937	0.982904	1	65.8	0.285588	1.21891	0.851204	0.946826	1	80.6	-0.25596	-1.19413	0.86634	0.993871	1	53.4	0.363802	1.28681	0.811149	0.903384	1	80.6	-0.177745	-1.13111	0.906961	0.971539	1	65.8	0.0782146	1.05571	0.959003	0.997082	1
g__Fusobacterium, 4391463	0	0.301765	1.23265	0.912655	0.982904	1	0	0.437342	1.35411	0.874267	0.946826	1	0	0.135578	1.09853	0.957326	0.993871	1	0.4	2.60006	6.0631	0.252266	0.739844	1	0.4	2.29829	4.91875	0.246853	0.918974	1	0.4	2.16271	4.47756	0.280081	0.993629	1
o__Clostridiales, 4399086	92.8	-0.579164	-1.49398	0.577797	0.982904	1	92.8	-0.700319	-1.62486	0.501222	0.928292	1	67.6	-0.121155	-1.08761	0.907427	0.993871	1	92.8	-1.01374	-2.01914	0.330945	0.794631	1	67.6	-0.43458	-1.35152	0.677025	0.963978	1	55.2	-0.313425	-1.24265	0.764028	0.993629	1
s__dispar, 4401373	0	0.301765	1.23265	0.912676	0.982904	1	0.4	2.47903	5.57521	0.276352	0.76967	1	0.4	2.17726	4.52295	0.274357	0.993871	1	0	0.694867	1.61874	0.796431	0.90078	1	0	0.393102	1.31321	0.872884	0.963978	1	0.4	-1.78416	-3.44418	0.350435	0.993629	1
o__YS2, 4405128	6.2	-0.215935	-1.16146	0.804885	0.982904	1	6.2	-1.22102	-2.33111	0.186985	0.76967	1	5.8	-1.00508	-2.00705	0.276796	0.993871	1	6.2	0.0332292	1.0233	0.969693	0.984826	1	5.8	0.249164	1.18852	0.775424	0.963978	1	5.6	1.25424	2.38542	0.174942	0.993629	1
g__Coprobacillus, 4407703	1	0.653935	1.57345	0.665873	0.982904	1	0.8	0.524685	1.43862	0.734029	0.946826	1	1	-0.129251	-1.09373	0.928121	0.993871	1	0.4	-0.0273536	-1.01914	0.98663	0.993826	1	1	-0.681289	-1.60357	0.655538	0.963978	1	0.8	-0.552038	-1.46616	0.722905	0.993629	1
o__Clostridiales, 4432238	0	0.301765	1.23265	0.912774	0.982904	1	0.4	2.47895	5.57492	0.277154	0.76967	1	0.4	2.17719	4.52271	0.275379	0.993871	1	0	0.694867	1.61874	0.796666	0.90078	1	0	0.393102	1.31321	0.873059	0.963978	1	0.4	-1.78409	-3.444	0.351561	0.993629	1
g__Flexispira, 4438847	1.8	0.504618	1.41875	0.69859	0.982904	1	1.2	-3.30611	-9.89098	0.129184	0.76967	1	1.8	-3.81073	-14.0328	0.075863	0.993871	1	1.6	0.564779	1.47916	0.667628	0.90078	1	1.8	0.0601611	1.04258	0.961951	0.989169	1	1.6	3.87089	14.6304	0.072324	0.993629	1
f__Ruminococcaceae, 4439489	7.6	-0.639953	-1.55828	0.593704	0.982904	1	6.8	-1.94211	-3.84268	0.118727	0.76967	1	7.6	-1.30216	-2.46598	0.297715	0.993871	1	6.8	-1.78526	-3.44681	0.150763	0.739844	1	7.6	-1.14531	-2.21194	0.358816	0.918974	1	2.8	0.156849	1.11485	0.903349	0.993629	1
f__Rikenellaceae, 4449518	0.6	-0.645794	-1.5646	0.696183	0.982904	1	0.6	-0.647072	-1.56599	0.700401	0.946826	1	0.4	-0.00127764	-1.00089	0.999414	0.999529	1	1.2	0.853459	1.80683	0.572602	0.90078	1	1.2	1.49925	2.82696	0.341713	0.918974	1	1.2	1.50053	2.82947	0.350135	0.993629	1
o__Clostridiales, 4460602	0	0.301932	1.23279	0.914469	0.982904	1	0.6	2.92847	7.61303	0.20358	0.76967	1	0.6	2.62654	6.17543	0.193446	0.993871	1	0	0.695976	1.61998	0.80052	0.90078	1	0	0.394044	1.31407	0.875847	0.963978	1	0.6	-2.2325	-4.69946	0.249811	0.993629	1
g__Odoribacter, 4466511	18	-0.207483	-1.15467	0.788812	0.982904	1	17.4	-0.155678	-1.11395	0.840957	0.946826	1	18	0.0518051	1.03656	0.946705	0.993871	1	17.4	-0.240988	-1.1818	0.756834	0.90078	1	18	-0.0335046	-1.0235	0.965628	0.99127	1	17.2	-0.0853097	-1.06092	0.91276	0.993629	1
o__Clostridiales, 4470864	0	0.301783	1.23267	0.914036	0.982904	1	0	0.43733	1.3541	0.876236	0.946826	1	0	0.135546	1.09851	0.958115	0.993871	1	0.6	3.04633	8.26109	0.181694	0.739844	1	0.6	2.74455	6.70181	0.168836	0.918974	1	0.6	2.609	6.10082	0.194732	0.993629	1
o__Clostridiales, 4471135	1	0.433712	1.3507	0.758355	0.982904	1	0.8	-0.707525	-1.633	0.653957	0.946826	1	1	-1.14124	-2.2057	0.451405	0.993871	1	1.2	0.717213	1.644	0.610404	0.90078	1	1.2	0.283501	1.21715	0.832047	0.963978	1	1.2	1.42474	2.68466	0.346517	0.993629	1
o__RF32, M70574:46:000000000-J6F43:1:2102:24804:11918 1:N:0:ACCTGGAT+GTGTGTCA/M70574:46:000000000-J6F43:1:2102:24804:11918 2:N:0:ACCTGGAT+GTGTGTCA	35.8	-0.752513	-1.68473	0.645849	0.982904	1	36.8	-0.677857	-1.59976	0.678961	0.946826	1	36.8	0.0746565	1.05311	0.963669	0.993871	1	24.6	-1.1679	-2.24684	0.476458	0.833953	1	35.8	-0.415386	-1.33366	0.800228	0.963978	1	36.8	-0.490042	-1.40449	0.765332	0.993629	1
o__Bacteroidales, M70574:46:000000000-J6F43:1:2108:15853:12932 1:N:0:ACCTGGAT+GTGTGTCA/M70574:46:000000000-J6F43:1:2108:15853:12932 2:N:0:ACCTGGAT+GTGTGTCA	25.6	-0.142626	-1.10391	0.880073	0.982904	1	22	-0.242565	-1.18309	0.797882	0.946826	1	25.6	-0.099939	-1.07173	0.915881	0.993871	1	20.2	-0.443498	-1.3599	0.640623	0.90078	1	25.6	-0.300872	-1.23189	0.751217	0.963978	1	22	-0.200933	-1.14944	0.832645	0.993629	1
g__Paraprevotella, M70574:46:000000000-J6F43:1:2111:18154:11895 1:N:0:ACCTGGAT+TAACTCTG/M70574:46:000000000-J6F43:1:2111:18154:11895 2:N:0:ACCTGGAT+TAACTCTG	50.6	-0.238183	-1.17951	0.891251	0.982904	1	62.6	0.100919	1.07246	0.953795	0.972739	1	62.6	0.339102	1.26497	0.845624	0.993871	1	36.2	-0.298872	-1.23018	0.863845	0.936028	1	50.6	-0.060689	-1.04296	0.972221	0.991963	1	62.6	-0.399791	-1.31932	0.818521	0.993629	1
g__Rikenella, M70574:46:000000000-J6F43:1:1114:7801:9100 1:N:0:ACCTGGAT+CCGATCTT/M70574:46:000000000-J6F43:1:1114:7801:9100 2:N:0:ACCTGGAT+CCGATCTT	52.4	-0.272026	-1.2075	0.744729	0.982904	1	52.4	-1.01586	-2.0221	0.226656	0.76967	1	50.4	-0.74383	-1.67462	0.375977	0.993871	1	52.4	-0.671803	-1.59306	0.423149	0.79601	1	50.4	-0.399776	-1.3193	0.633591	0.963978	1	31.6	0.344053	1.26932	0.683327	0.993629	1
g__Helicobacter, M70574:46:000000000-J6F43:1:2112:15873:19535 1:N:0:ACCTGGAT+TTCTAGAC/M70574:46:000000000-J6F43:1:2112:15873:19535 2:N:0:ACCTGGAT+TTCTAGAC	19.6	-0.435709	-1.35258	0.604527	0.982904	1	19.6	-1.48931	-2.80754	0.084124	0.76967	1	14.6	-1.0536	-2.0757	0.2226	0.993871	1	19.6	-1.8152	-3.51907	0.0380015	0.577206	1	14.6	-1.37949	-2.60176	0.1155	0.918974	1	6.4	-0.325888	-1.25344	0.716247	0.993629	1
f__S24-7, M70574:46:000000000-J6F43:1:1110:12840:9097 1:N:0:ACCTGGAT+GTGTGTCA/M70574:46:000000000-J6F43:1:1110:12840:9097 2:N:0:ACCTGGAT+GTGTGTCA	7.4	0.37848	1.29997	0.726124	0.982904	1	4.4	-0.252707	-1.19144	0.818709	0.946826	1	7.4	-0.631186	-1.54884	0.560969	0.993871	1	5.6	0.32167	1.24978	0.767534	0.90078	1	7.4	-0.0568093	-1.04016	0.9577	0.989169	1	5.6	0.574377	1.48903	0.59933	0.993629	1
o__RF32, M70574:46:000000000-J6F43:1:2108:24721:10357 1:N:0:ACCTGGAT+GTGTGTCA/M70574:46:000000000-J6F43:1:2108:24721:10357 2:N:0:ACCTGGAT+GTGTGTCA	12.8	0.321014	1.24921	0.856051	0.982904	1	11	0.138828	1.10101	0.937577	0.97244	1	12.8	-0.182186	-1.1346	0.917861	0.993871	1	11.6	0.606075	1.52211	0.731968	0.90078	1	12.8	0.285061	1.21846	0.87158	0.963978	1	11.6	0.467247	1.38247	0.79139	0.993629	1
f__Lachnospiraceae, M70574:46:000000000-J6F43:1:1113:14921:21709 1:N:0:ACCTGGAT+AGGTCATT/M70574:46:000000000-J6F43:1:1113:14921:21709 2:N:0:ACCTGGAT+AGGTCATT	0	0.30241	1.2332	0.915745	0.982904	1	0	0.436912	1.3537	0.879038	0.946826	1	0	0.134502	1.09771	0.959484	0.993871	1	1	3.52891	11.5427	0.128869	0.739844	1	1	3.2265	9.35993	0.114026	0.918974	1	1	3.092	8.52675	0.133164	0.993629	1
o__Clostridiales, M70574:46:000000000-J6F43:1:2102:13385:22372 1:N:0:ACCTGGAT+CCGATCTT/M70574:46:000000000-J6F43:1:2102:13385:22372 2:N:0:ACCTGGAT+CCGATCTT	12.8	-0.399647	-1.31919	0.655058	0.982904	1	12.8	-1.21287	-2.31798	0.185784	0.76967	1	10.4	-0.81322	-1.75713	0.375969	0.993871	1	12.8	-1.11158	-2.16082	0.225373	0.739844	1	10.4	-0.711929	-1.63799	0.438405	0.918974	1	5	0.101291	1.07273	0.914212	0.993629	1
o__RF32, M70574:46:000000000-J6F43:1:2105:4484:13851 1:N:0:ACCTGGAT+TAACTCTG/M70574:46:000000000-J6F43:1:2105:4484:13851 2:N:0:ACCTGGAT+TAACTCTG	3	0.643895	1.56254	0.677755	0.982904	1	1.6	-0.118073	-1.08528	0.941007	0.97244	1	3	-0.761968	-1.6958	0.623303	0.993871	1	0.8	-3.28578	-9.75255	0.145669	0.739844	1	3	-3.92968	-15.2388	0.0776743	0.918974	1	1.6	-3.16771	-8.98617	0.160922	0.993629	1
f__S24-7, M70574:46:000000000-J6F43:1:2116:15479:7134 1:N:0:ACCTGGAT+CACTAATG/M70574:46:000000000-J6F43:1:2116:15479:7134 2:N:0:ACCTGGAT+CACTAATG	4	0.568238	1.48271	0.702243	0.982904	1	5.2	0.907274	1.8755	0.540344	0.946826	1	5.2	0.339036	1.26491	0.815303	0.993871	1	2	-0.0663908	-1.04709	0.965148	0.982218	1	4	-0.634629	-1.55254	0.67013	0.963978	1	5.2	-0.973665	-1.96382	0.512104	0.993629	1
g__Allobaculum, M70574:46:000000000-J6F43:1:2119:16552:21438 1:N:0:ACCTGGAT+CACTAATG/M70574:46:000000000-J6F43:1:2119:16552:21438 2:N:0:ACCTGGAT+CACTAATG	0	0.302505	1.23328	0.915905	0.982904	1	1	3.43387	10.8068	0.140889	0.76967	1	1	3.13136	8.76261	0.126778	0.993871	1	0	0.699791	1.62427	0.803225	0.90078	1	0	0.397285	1.31703	0.877603	0.963978	1	1	-2.73408	-6.65333	0.165441	0.993629	1
f__Lachnospiraceae, M70574:46:000000000-J6F43:1:1102:5854:15494 1:N:0:GTGCCATA+AGGTCATT/M70574:46:000000000-J6F43:1:1102:5854:15494 2:N:0:GTGCCATA+AGGTCATT	0	0.302376	1.23317	0.915273	0.982904	1	0	0.436933	1.35372	0.878349	0.946826	1	0	0.134557	1.09776	0.959202	0.993871	1	0.8	3.3808	10.4165	0.143891	0.739844	1	0.8	3.07843	8.44693	0.129429	0.918974	1	0.8	2.94387	7.69473	0.15051	0.993629	1
g__Coprococcus, M70574:46:000000000-J6F43:1:1106:24771:8319 1:N:0:ACCTGGAT+CCGATCTT/M70574:46:000000000-J6F43:1:1106:24771:8319 2:N:0:ACCTGGAT+CCGATCTT	0.8	0.576616	1.49135	0.691868	0.982904	1	0.4	-2.00709	-4.01971	0.363646	0.771807	1	0.8	-2.58371	-5.99479	0.225246	0.993871	1	0.4	0.0802434	1.0572	0.959076	0.977633	1	0.8	-0.496373	-1.41066	0.732157	0.963978	1	0.4	2.08734	4.24963	0.344116	0.993629	1
f__Ruminococcaceae, M70574:46:000000000-J6F43:1:1107:15942:6394 1:N:0:ACCTGGAT+AGGTCATT/M70574:46:000000000-J6F43:1:1107:15942:6394 2:N:0:ACCTGGAT+AGGTCATT	0.6	-0.468929	-1.38408	0.763995	0.982904	1	0.6	-0.287293	-1.22035	0.853765	0.946826	1	0.4	0.181636	1.13417	0.909606	0.993871	1	1.4	1.1688	2.24825	0.403718	0.794631	1	1.4	1.63773	3.11176	0.257191	0.918974	1	1.4	1.45609	2.74365	0.312602	0.993629	1
o__Clostridiales, M70574:46:000000000-J6F43:1:1107:5826:18793 1:N:0:ACCTGGAT+GTGTGTCA/M70574:46:000000000-J6F43:1:1107:5826:18793 2:N:0:ACCTGGAT+GTGTGTCA	1.8	0.374563	1.29645	0.823138	0.982904	1	3	1.09514	2.13634	0.507014	0.93422	1	3	0.720581	1.64785	0.654081	0.993871	1	1.8	0.779441	1.71647	0.640432	0.90078	1	1.8	0.404877	1.32398	0.80344	0.963978	1	3	-0.315703	-1.24462	0.843645	0.993629	1
k__Bacteria, M70574:46:000000000-J6F43:1:1110:8170:8117 1:N:0:GTGCCATA+TAAGATCC/M70574:46:000000000-J6F43:1:1110:8170:8117 2:N:0:GTGCCATA+TAAGATCC	0	0.302554	1.23333	0.916013	0.982904	1	0.8	3.36901	10.3317	0.15014	0.76967	1	0.8	3.06645	8.3771	0.136793	0.993871	1	0	0.700118	1.62464	0.803421	0.90078	1	0	0.397564	1.31728	0.877727	0.963978	1	0.8	-2.66889	-6.35939	0.178074	0.993629	1
g__Oscillospira, M70574:46:000000000-J6F43:1:1117:22524:11231 1:N:0:TGAATCCG+AGGTCATT/M70574:46:000000000-J6F43:1:1117:22524:11231 2:N:0:TGAATCCG+AGGTCATT	0	0.302609	1.23337	0.915965	0.982904	1	0	0.436784	1.35358	0.879467	0.946826	1	0	0.134175	1.09747	0.959735	0.993871	1	0.8	3.51596	11.4395	0.132348	0.739844	1	0.8	3.21335	9.27499	0.117994	0.918974	1	0.8	3.07917	8.45129	0.137423	0.993629	1
s__gnavus, M70574:46:000000000-J6F43:1:1117:27031:7152 1:N:0:GTGCCATA+CCACAGGT/M70574:46:000000000-J6F43:1:1117:27031:7152 2:N:0:GTGCCATA+CCACAGGT	0	0.302854	1.23358	0.916182	0.982904	1	0	0.436632	1.35344	0.879916	0.946826	1	0	0.133778	1.09716	0.960011	0.993871	1	0.8	3.69135	12.9183	0.114456	0.739844	1	0.8	3.38849	10.4722	0.0996222	0.918974	1	0.8	3.25471	9.54479	0.116799	0.993629	1
g__Allobaculum, M70574:46:000000000-J6F43:1:2102:10728:21678 1:N:0:ACCTGGAT+CCACAGGT/M70574:46:000000000-J6F43:1:2102:10728:21678 2:N:0:ACCTGGAT+CCACAGGT	0	0.303661	1.23427	0.919593	0.982904	1	0.8	3.08128	8.46364	0.222851	0.76967	1	0.8	2.77762	6.85718	0.22046	0.993871	1	2.4	4.7621	27.1353	0.0526275	0.666776	1	2.4	4.45844	21.9848	0.0415835	0.918974	1	2.4	1.68082	3.2061	0.249237	0.993629	1
s__gnavus, M70574:46:000000000-J6F43:1:2103:13403:11064 1:N:0:ACCTGGAT+AGGTCATT/M70574:46:000000000-J6F43:1:2103:13403:11064 2:N:0:ACCTGGAT+AGGTCATT	0	0.302158	1.23299	0.914576	0.982904	1	0	0.437076	1.35386	0.877232	0.946826	1	0	0.134918	1.09803	0.958672	0.993871	1	0.8	3.30946	9.91397	0.147877	0.739844	1	0.8	3.00731	8.04061	0.132847	0.918974	1	0.8	2.87239	7.32276	0.154724	0.993629	1
f__Helicobacteraceae, M70574:46:000000000-J6F43:1:2103:2708:13528 1:N:0:GTGCCATA+CCACAGGT/M70574:46:000000000-J6F43:1:2103:2708:13528 2:N:0:GTGCCATA+CCACAGGT	4.8	-0.38611	-1.30686	0.675353	0.982904	1	5	0.0624864	1.04426	0.94535	0.97244	1	5	0.448596	1.36471	0.624551	0.993871	1	4.8	-0.214657	-1.16043	0.816604	0.907996	1	4	0.171452	1.12619	0.853815	0.963978	1	5	-0.277144	-1.21179	0.763303	0.993629	1
g__Lactobacillus, M70574:46:000000000-J6F43:1:2106:8483:4454 1:N:0:ACCTGGAT+AGGTCATT/M70574:46:000000000-J6F43:1:2106:8483:4454 2:N:0:ACCTGGAT+AGGTCATT	0	0.302485	1.23327	0.916751	0.982904	1	0.6	2.89257	7.42592	0.229302	0.76967	1	0.6	2.59008	6.02134	0.224821	0.993871	1	0.8	3.26299	9.5997	0.171126	0.739844	1	0.8	2.9605	7.78396	0.160405	0.918974	1	0.8	0.37042	1.29273	0.78611	0.993629	1
g__Ruminococcus, M70574:46:000000000-J6F43:1:2106:9227:18530 1:N:0:GTGCCATA+AGGTCATT/M70574:46:000000000-J6F43:1:2106:9227:18530 2:N:0:GTGCCATA+AGGTCATT	0	0.303125	1.23381	0.918177	0.982904	1	0.8	3.11547	8.66661	0.204769	0.76967	1	0.8	2.81234	7.02425	0.198916	0.993871	1	1.2	3.85896	14.5099	0.110629	0.739844	1	1.2	3.55584	11.7602	0.0976016	0.918974	1	1.2	0.743496	1.67423	0.593181	0.993629	1
o__Clostridiales, M70574:46:000000000-J6F43:1:2108:27065:12808 1:N:0:GTGCCATA+TAAGATCC/M70574:46:000000000-J6F43:1:2108:27065:12808 2:N:0:GTGCCATA+TAAGATCC	0	0.302554	1.23333	0.915994	0.982904	1	0.8	3.36901	10.3317	0.150005	0.76967	1	0.8	3.06645	8.3771	0.13663	0.993871	1	0	0.700118	1.62464	0.803377	0.90078	1	0	0.397564	1.31728	0.877695	0.963978	1	0.8	-2.66889	-6.35939	0.177878	0.993629	1
g__Allobaculum, M70574:46:000000000-J6F43:1:2108:7661:18759 1:N:0:GTGCCATA+AGGTCATT/M70574:46:000000000-J6F43:1:2108:7661:18759 2:N:0:GTGCCATA+AGGTCATT	0	0.302376	1.23317	0.915298	0.982904	1	0	0.436933	1.35372	0.878386	0.946826	1	0	0.134557	1.09776	0.959216	0.993871	1	0.8	3.3808	10.4165	0.144075	0.739844	1	0.8	3.07843	8.44693	0.129653	0.918974	1	0.8	2.94387	7.69473	0.150743	0.993629	1
f__Ruminococcaceae, M70574:46:000000000-J6F43:1:2109:19216:10693 1:N:0:ACCTGGAT+CACTAATG/M70574:46:000000000-J6F43:1:2109:19216:10693 2:N:0:ACCTGGAT+CACTAATG	0	0.302255	1.23307	0.91511	0.982904	1	0.8	3.20233	9.20442	0.165936	0.76967	1	0.8	2.90007	7.46464	0.152775	0.993871	1	0	0.698121	1.62239	0.801637	0.90078	1	0	0.395866	1.31573	0.876539	0.963978	1	0.8	-2.50421	-5.67337	0.198667	0.993629	1
g__Adlercreutzia, M70574:46:000000000-J6F43:1:2112:22978:17994 1:N:0:ACCTGGAT+CCACAGGT/M70574:46:000000000-J6F43:1:2112:22978:17994 2:N:0:ACCTGGAT+CCACAGGT	0	0.302879	1.2336	0.916778	0.982904	1	0	0.436617	1.35343	0.880772	0.946826	1	0	0.133738	1.09713	0.96035	0.993871	1	1.2	3.8793	14.7158	0.099437	0.739844	1	1.2	3.57642	11.9291	0.0848285	0.918974	1	1.2	3.44268	10.873	0.0999318	0.993629	1
s__pseudolongum, M70574:46:000000000-J6F43:1:2112:3904:12389 1:N:0:ACCTGGAT+CCACAGGT/M70574:46:000000000-J6F43:1:2112:3904:12389 2:N:0:ACCTGGAT+CCACAGGT	0	0.302447	1.23323	0.915472	0.982904	1	0	0.436888	1.35368	0.878673	0.946826	1	0	0.134441	1.09767	0.959358	0.993871	1	0.8	3.38719	10.4628	0.144634	0.739844	1	0.8	3.08475	8.48401	0.130463	0.918974	1	0.8	2.95031	7.72913	0.151529	0.993629	1
f__Christensenellaceae, M70574:46:000000000-J6F43:1:2113:14387:12658 1:N:0:ACCTGGAT+CACTAATG/M70574:46:000000000-J6F43:1:2113:14387:12658 2:N:0:ACCTGGAT+CACTAATG	0	0.302255	1.23307	0.915073	0.982904	1	0.8	3.20233	9.20442	0.165666	0.76967	1	0.8	2.90007	7.46464	0.152441	0.993871	1	0	0.698121	1.62239	0.801549	0.90078	1	0	0.395866	1.31573	0.876475	0.963978	1	0.8	-2.50421	-5.67337	0.198269	0.993629	1
o__Clostridiales, M70574:46:000000000-J6F43:1:2113:20066:14893 1:N:0:ACCTGGAT+TTCTAGAC/M70574:46:000000000-J6F43:1:2113:20066:14893 2:N:0:ACCTGGAT+TTCTAGAC	23.8	-0.167007	-1.12273	0.856125	0.982904	1	23.8	-0.493872	-1.40822	0.593652	0.946826	1	23.4	-0.326864	-1.25428	0.723721	0.993871	1	23.8	-0.32377	-1.2516	0.726333	0.90078	1	23.4	-0.156763	-1.11478	0.865292	0.963978	1	18.4	0.170102	1.12514	0.854653	0.993629	1
o__RF39, M70574:46:000000000-J6F43:1:2115:12078:21999 1:N:0:ACCTGGAT+CCACAGGT/M70574:46:000000000-J6F43:1:2115:12078:21999 2:N:0:ACCTGGAT+CCACAGGT	0.6	-0.732339	-1.66133	0.640964	0.982904	1	0.6	-2.55102	-5.8605	0.248731	0.76967	1	0.4	-1.81868	-3.52759	0.42256	0.993871	1	0.8	0.390287	1.31065	0.787307	0.90078	1	0.8	1.12263	2.17743	0.463354	0.940742	1	0.8	2.94131	7.68108	0.178019	0.993629	1
g__Adlercreutzia, M70574:46:000000000-J6F43:1:2116:28182:7147 1:N:0:TGAATCCG+AGGTCATT/M70574:46:000000000-J6F43:1:2116:28182:7147 2:N:0:TGAATCCG+AGGTCATT	0	0.302609	1.23337	0.916037	0.982904	1	0	0.436784	1.35358	0.879568	0.946826	1	0	0.134175	1.09747	0.959774	0.993871	1	0.8	3.51596	11.4395	0.132844	0.739844	1	0.8	3.21335	9.27499	0.118589	0.918974	1	0.8	3.07917	8.45129	0.138048	0.993629	1
o__Clostridiales, M70574:46:000000000-J6F43:1:2118:13594:21342 1:N:0:GTGCCATA+AGGTCATT/M70574:46:000000000-J6F43:1:2118:13594:21342 2:N:0:GTGCCATA+AGGTCATT	0.6	0.495409	1.40972	0.759043	0.982904	1	1	1.27454	2.41921	0.411871	0.816927	1	1	0.779129	1.71609	0.587824	0.993871	1	0.8	1.04407	2.06204	0.509506	0.872988	1	0.8	0.548665	1.46273	0.708888	0.963978	1	1	-0.230465	-1.17321	0.869359	0.993629	1
o__Clostridiales, M70574:46:000000000-J6F43:1:2118:27029:11879 1:N:0:GTGCCATA+AGGTCATT/M70574:46:000000000-J6F43:1:2118:27029:11879 2:N:0:GTGCCATA+AGGTCATT	0	0.302376	1.23317	0.915324	0.982904	1	0	0.436933	1.35372	0.878422	0.946826	1	0	0.134557	1.09776	0.959231	0.993871	1	0.8	3.3808	10.4165	0.144258	0.739844	1	0.8	3.07843	8.44693	0.129875	0.918974	1	0.8	2.94387	7.69473	0.150975	0.993629	1
g__Allobaculum, M70574:46:000000000-J6F43:1:1101:16518:9970 1:N:0:ACCTGGAT+CCACAGGT/M70574:46:000000000-J6F43:1:1101:16518:9970 2:N:0:ACCTGGAT+CCACAGGT	0	0.302076	1.23292	0.914501	0.982904	1	0	0.437131	1.35391	0.877075	0.946826	1	0	0.135055	1.09813	0.958574	0.993871	1	0.6	3.05055	8.2853	0.185293	0.739844	1	0.6	2.74848	6.72008	0.173461	0.918974	1	0.6	2.61342	6.11954	0.199404	0.993629	1
f__S24-7, M70574:46:000000000-J6F43:1:1101:25242:17619 1:N:0:ACCTGGAT+AGGTCATT/M70574:46:000000000-J6F43:1:1101:25242:17619 2:N:0:ACCTGGAT+AGGTCATT	0	0.301783	1.23267	0.914052	0.982904	1	0	0.43733	1.3541	0.876259	0.946826	1	0	0.135546	1.09851	0.958124	0.993871	1	0.6	3.04633	8.26109	0.181815	0.739844	1	0.6	2.74455	6.70181	0.168987	0.918974	1	0.6	2.609	6.10082	0.194888	0.993629	1
o__Clostridiales, M70574:46:000000000-J6F43:1:1103:14525:23026 1:N:0:ACCTGGAT+CCACAGGT/M70574:46:000000000-J6F43:1:1103:14525:23026 2:N:0:ACCTGGAT+CCACAGGT	0	0.302476	1.23326	0.91684	0.982904	1	0.4	2.52188	5.74331	0.30245	0.76967	1	0.4	2.21941	4.65702	0.308232	0.993871	1	1.4	4.08267	16.9436	0.0814068	0.739844	1	1.4	3.78019	13.7389	0.0667848	0.918974	1	1.4	1.56079	2.95015	0.250098	0.993629	1
o__Clostridiales, M70574:46:000000000-J6F43:1:1103:3468:13360 1:N:0:ACCTGGAT+CCGATCTT/M70574:46:000000000-J6F43:1:1103:3468:13360 2:N:0:ACCTGGAT+CCGATCTT	1.8	-0.199986	-1.14869	0.866486	0.982904	1	1.8	-1.76248	-3.39282	0.210061	0.76967	1	1.6	-1.5625	-2.95365	0.265826	0.993871	1	1.8	-3.5261	-11.5202	0.079557	0.739844	1	1.6	-3.32611	-10.029	0.0979345	0.918974	1	0.4	-1.76361	-3.39547	0.410994	0.993629	1
g__Ruminococcus, M70574:46:000000000-J6F43:1:1103:6119:9653 1:N:0:ACCTGGAT+TTCTAGAC/M70574:46:000000000-J6F43:1:1103:6119:9653 2:N:0:ACCTGGAT+TTCTAGAC	4.6	0.370132	1.29247	0.765814	0.982904	1	3.2	-0.956744	-1.94092	0.467398	0.886644	1	4.6	-1.32688	-2.50859	0.30538	0.993871	1	3.2	-2.29982	-4.92397	0.123314	0.739844	1	4.6	-2.66995	-6.36408	0.069907	0.918974	1	1.6	-1.34308	-2.53692	0.381868	0.993629	1
g__Lactobacillus, M70574:46:000000000-J6F43:1:1104:13990:18692 1:N:0:GTGCCATA+CCACAGGT/M70574:46:000000000-J6F43:1:1104:13990:18692 2:N:0:GTGCCATA+CCACAGGT	0	0.302535	1.23331	0.916131	0.982904	1	0.4	2.44108	5.43049	0.314432	0.76967	1	0.4	2.13855	4.40318	0.321576	0.993871	1	0.6	3.23987	9.44706	0.169919	0.739844	1	0.6	2.93733	7.65993	0.158494	0.918974	1	0.6	0.798784	1.73963	0.56967	0.993629	1
o__Clostridiales, M70574:46:000000000-J6F43:1:1104:2275:9428 1:N:0:ACCTGGAT+CCACAGGT/M70574:46:000000000-J6F43:1:1104:2275:9428 2:N:0:ACCTGGAT+CCACAGGT	0.4	-0.229624	-1.17253	0.882308	0.982904	1	0.4	-2.19314	-4.57298	0.322286	0.76967	1	0.4	-1.96351	-3.9001	0.376293	0.993871	1	0.6	0.414445	1.33279	0.781298	0.90078	1	0.6	0.64407	1.56273	0.667227	0.963978	1	0.6	2.60758	6.09481	0.231424	0.993629	1
g__Adlercreutzia, M70574:46:000000000-J6F43:1:1104:27557:15621 1:N:0:ACCTGGAT+CCACAGGT/M70574:46:000000000-J6F43:1:1104:27557:15621 2:N:0:ACCTGGAT+CCACAGGT	0	0.302076	1.23292	0.914518	0.982904	1	0	0.437131	1.35391	0.8771	0.946826	1	0	0.135055	1.09813	0.958584	0.993871	1	0.6	3.05055	8.2853	0.185431	0.739844	1	0.6	2.74848	6.72008	0.173632	0.918974	1	0.6	2.61342	6.11954	0.19958	0.993629	1
f__Ruminococcaceae, M70574:46:000000000-J6F43:1:1105:21179:10026 1:N:0:GTGCCATA+TAAGATCC/M70574:46:000000000-J6F43:1:1105:21179:10026 2:N:0:GTGCCATA+TAAGATCC	0.6	-0.55938	-1.47364	0.70955	0.982904	1	1.6	1.3454	2.54101	0.300191	0.76967	1	1.6	1.90478	3.74452	0.163036	0.993871	1	0.6	-0.246443	-1.18628	0.868662	0.936882	1	0.4	0.312938	1.24223	0.839894	0.963978	1	1.6	-1.59184	-3.01434	0.239329	0.993629	1
f__S24-7, M70574:46:000000000-J6F43:1:1105:23321:19071 1:N:0:ACCTGGAT+TAAGATCC/M70574:46:000000000-J6F43:1:1105:23321:19071 2:N:0:ACCTGGAT+TAAGATCC	0	0.301932	1.23279	0.914437	0.982904	1	0.6	2.92847	7.61303	0.203329	0.76967	1	0.6	2.62654	6.17543	0.193131	0.993871	1	0	0.695976	1.61998	0.800443	0.90078	1	0	0.394044	1.31407	0.87579	0.963978	1	0.6	-2.2325	-4.69946	0.249445	0.993629	1
f__S24-7, M70574:46:000000000-J6F43:1:1105:24047:9530 1:N:0:TGAATCCG+TAAGATCC/M70574:46:000000000-J6F43:1:1105:24047:9530 2:N:0:TGAATCCG+TAAGATCC	0	0.302155	1.23299	0.91497	0.982904	1	0.6	2.98054	7.89283	0.199234	0.76967	1	0.6	2.67839	6.4014	0.18924	0.993871	1	0	0.697461	1.62165	0.80143	0.90078	1	0	0.395305	1.31522	0.876427	0.963978	1	0.6	-2.28308	-4.86717	0.244278	0.993629	1
g__Megasphaera, M70574:46:000000000-J6F43:1:1105:7020:16342 1:N:0:GTGCCATA+CCACAGGT/M70574:46:000000000-J6F43:1:1105:7020:16342 2:N:0:GTGCCATA+CCACAGGT	0	0.302437	1.23323	0.915263	0.982904	1	0	0.436894	1.35369	0.878373	0.946826	1	0	0.134457	1.09768	0.959237	0.993871	1	0.6	3.21989	9.31713	0.1661	0.739844	1	0.6	2.91745	7.55509	0.153394	0.918974	1	0.6	2.78299	6.88278	0.176896	0.993629	1
f__S24-7, M70574:46:000000000-J6F43:1:1106:5599:7519 1:N:0:ACCTGGAT+TAACTCTG/M70574:46:000000000-J6F43:1:1106:5599:7519 2:N:0:ACCTGGAT+TAACTCTG	0.6	0.386008	1.30677	0.783046	0.982904	1	0.4	-1.92778	-3.8047	0.370224	0.77584	1	0.6	-2.31379	-4.97187	0.26705	0.993871	1	0.4	-1.66788	-3.17747	0.41807	0.79601	1	0.6	-2.05388	-4.15223	0.302003	0.918974	1	0	0.259905	1.1974	0.919557	0.993629	1
o__Clostridiales, M70574:46:000000000-J6F43:1:1107:14384:23665 1:N:0:ACCTGGAT+CCGATCTT/M70574:46:000000000-J6F43:1:1107:14384:23665 2:N:0:ACCTGGAT+CCGATCTT	0.6	0.361544	1.2848	0.807032	0.982904	1	0.4	-1.92135	-3.78776	0.38262	0.790327	1	0.6	-2.28289	-4.86652	0.285316	0.993871	1	0.4	0.242437	1.18299	0.874726	0.936882	1	0.6	-0.119107	-1.08606	0.93429	0.978207	1	0.4	2.16378	4.48088	0.320236	0.993629	1
f__Ruminococcaceae, M70574:46:000000000-J6F43:1:1107:15870:8233 1:N:0:ACCTGGAT+TAAGATCC/M70574:46:000000000-J6F43:1:1107:15870:8233 2:N:0:ACCTGGAT+TAAGATCC	0	0.30233	1.23313	0.915884	0.982904	1	0.6	2.90153	7.47217	0.220409	0.76967	1	0.6	2.5992	6.05949	0.213935	0.993871	1	0.4	2.70371	6.51477	0.258844	0.739844	1	0.4	2.40138	5.28309	0.257697	0.918974	1	0.6	-0.197814	-1.14696	0.886305	0.993629	1
f__S24-7, M70574:46:000000000-J6F43:1:1107:8016:21963 1:N:0:GTGCCATA+AGGTCATT/M70574:46:000000000-J6F43:1:1107:8016:21963 2:N:0:GTGCCATA+AGGTCATT	0	0.301996	1.23285	0.914596	0.982904	1	0	0.437185	1.35396	0.877161	0.946826	1	0	0.135189	1.09824	0.958573	0.993871	1	0.6	3.04813	8.27138	0.186222	0.739844	1	0.6	2.74613	6.70916	0.174552	0.918974	1	0.6	2.61094	6.10903	0.200557	0.993629	1
g__Lactobacillus, M70574:46:000000000-J6F43:1:1108:13954:4273 1:N:0:ACCTGGAT+CCACAGGT/M70574:46:000000000-J6F43:1:1108:13954:4273 2:N:0:ACCTGGAT+CCACAGGT	0	0.302076	1.23292	0.914536	0.982904	1	0	0.437131	1.35391	0.877125	0.946826	1	0	0.135055	1.09813	0.958594	0.993871	1	0.6	3.05055	8.2853	0.185568	0.739844	1	0.6	2.74848	6.72008	0.173803	0.918974	1	0.6	2.61342	6.11954	0.199755	0.993629	1
o__Clostridiales, M70574:46:000000000-J6F43:1:1108:16637:18595 1:N:0:GTGCCATA+CCGATCTT/M70574:46:000000000-J6F43:1:1108:16637:18595 2:N:0:GTGCCATA+CCGATCTT	2.4	0.307779	1.2378	0.829397	0.982904	1	2	-1.92314	-3.79246	0.246568	0.76967	1	2.4	-2.23091	-4.69431	0.172492	0.993871	1	2	0.250962	1.19	0.861949	0.935811	1	2.4	-0.0568172	-1.04017	0.967972	0.99127	1	1.8	2.1741	4.51303	0.187156	0.993629	1
f__S24-7, M70574:46:000000000-J6F43:1:1109:12856:8273 1:N:0:GTGCCATA+CCGATCTT/M70574:46:000000000-J6F43:1:1109:12856:8273 2:N:0:GTGCCATA+CCGATCTT	0.6	0.370983	1.29323	0.794277	0.982904	1	0.4	-2.00011	-4.00032	0.356745	0.76967	1	0.6	-2.3711	-5.17334	0.260714	0.993871	1	0.4	-1.73808	-3.33591	0.403072	0.794631	1	0.6	-2.10906	-4.31411	0.294947	0.918974	1	0	0.262033	1.19917	0.919613	0.993629	1
o__Clostridiales, M70574:46:000000000-J6F43:1:1109:29245:13841 1:N:0:ATGCCATA+TAAGATCC/M70574:46:000000000-J6F43:1:1109:29245:13841 2:N:0:ATGCCATA+TAAGATCC	0	0.30215	1.23298	0.914968	0.982904	1	0.6	2.9786	7.8822	0.199534	0.76967	1	0.6	2.67645	6.3928	0.189571	0.993871	1	0	0.697425	1.62161	0.801434	0.90078	1	0	0.395275	1.31519	0.876431	0.963978	1	0.6	-2.28117	-4.86073	0.244687	0.993629	1
g__Bifidobacterium, M70574:46:000000000-J6F43:1:1110:10687:23584 1:N:0:ACCTGGAT+AGGTCATT/M70574:46:000000000-J6F43:1:1110:10687:23584 2:N:0:ACCTGGAT+AGGTCATT	0	0.301783	1.23267	0.914047	0.982904	1	0	0.43733	1.3541	0.876252	0.946826	1	0	0.135546	1.09851	0.958121	0.993871	1	0.6	3.04633	8.26109	0.18178	0.739844	1	0.6	2.74455	6.70181	0.168943	0.918974	1	0.6	2.609	6.10082	0.194842	0.993629	1
o__Clostridiales, M70574:46:000000000-J6F43:1:1112:26102:10126 1:N:0:ACCTGGAT+TTCTAGAC/M70574:46:000000000-J6F43:1:1112:26102:10126 2:N:0:ACCTGGAT+TTCTAGAC	1	-0.13319	-1.09672	0.920915	0.982904	1	1	-0.971689	-1.96114	0.513095	0.935866	1	1	-0.8385	-1.78819	0.570397	0.993871	1	1	-0.891881	-1.85559	0.548685	0.90078	1	1	-0.758691	-1.69195	0.607981	0.963978	1	0.4	0.0798086	1.05688	0.960488	0.997082	1
g__[Prevotella], M70574:46:000000000-J6F43:1:1112:7143:8344 1:N:0:ACCTGGAT+AGGTCATT/M70574:46:000000000-J6F43:1:1112:7143:8344 2:N:0:ACCTGGAT+AGGTCATT	0.8	0.741397	1.67179	0.631923	0.982904	1	0.4	0.124646	1.09024	0.939913	0.97244	1	0.8	-0.61675	-1.53342	0.684374	0.993871	1	1	1.25661	2.38933	0.409118	0.794631	1	1	0.515209	1.4292	0.707474	0.963978	1	1	1.13196	2.19156	0.447828	0.993629	1
o__RF39, M70574:46:000000000-J6F43:1:1112:8648:12623 1:N:0:ACCTGGAT+AGGTCATT/M70574:46:000000000-J6F43:1:1112:8648:12623 2:N:0:ACCTGGAT+AGGTCATT	0	0.301783	1.23267	0.914054	0.982904	1	0	0.43733	1.3541	0.876261	0.946826	1	0	0.135546	1.09851	0.958125	0.993871	1	0.6	3.04633	8.26109	0.181827	0.739844	1	0.6	2.74455	6.70181	0.169002	0.918974	1	0.6	2.609	6.10082	0.194902	0.993629	1
f__Helicobacteraceae, M70574:46:000000000-J6F43:1:1113:13342:8251 1:N:0:ACCTGGAT+CCACAGGT/M70574:46:000000000-J6F43:1:1113:13342:8251 2:N:0:ACCTGGAT+CCACAGGT	0	0.302076	1.23292	0.914554	0.982904	1	0	0.437131	1.35391	0.877151	0.946826	1	0	0.135055	1.09813	0.958604	0.993871	1	0.6	3.05055	8.2853	0.185705	0.739844	1	0.6	2.74848	6.72008	0.173974	0.918974	1	0.6	2.61342	6.11954	0.19993	0.993629	1
f__Lachnospiraceae, M70574:46:000000000-J6F43:1:1113:9237:15683 1:N:0:TGAATCCG+AGGTCATT/M70574:46:000000000-J6F43:1:1113:9237:15683 2:N:0:TGAATCCG+AGGTCATT	0	0.302209	1.23303	0.915076	0.982904	1	0	0.437042	1.35383	0.877971	0.946826	1	0	0.134833	1.09797	0.958983	0.993871	1	0.6	3.11326	8.65339	0.180141	0.739844	1	0.6	2.81106	7.01798	0.16846	0.918974	1	0.6	2.67622	6.3918	0.193551	0.993629	1
g__Adlercreutzia, M70574:46:000000000-J6F43:1:1114:21210:21134 1:N:0:ACCTGGAT+CACTAATG/M70574:46:000000000-J6F43:1:1114:21210:21134 2:N:0:ACCTGGAT+CACTAATG	0	0.301765	1.23265	0.914568	0.982904	1	1	3.57337	11.9039	0.113757	0.76967	1	1	3.2716	9.65718	0.0966871	0.993871	1	0	0.694867	1.61874	0.800978	0.90078	1	0	0.393102	1.31321	0.87625	0.963978	1	1	-2.8785	-7.35385	0.127367	0.993629	1
o__RF39, M70574:46:000000000-J6F43:1:1115:15106:19296 1:N:0:ACCTGGAT+TAACTCTG/M70574:46:000000000-J6F43:1:1115:15106:19296 2:N:0:ACCTGGAT+TAACTCTG	0.6	0.39628	1.31611	0.76839	0.982904	1	0.4	-1.94687	-3.85537	0.357999	0.76967	1	0.6	-2.34315	-5.07409	0.253215	0.993871	1	0.4	-1.68934	-3.2251	0.404291	0.794631	1	0.6	-2.08562	-4.24459	0.2861	0.918974	1	0	0.257525	1.19543	0.91953	0.993629	1
M70574:46:000000000-J6F43:1:1115:23473:16046 1:N:0:ACCTGGAT+CCACAGGT/M70574:46:000000000-J6F43:1:1115:23473:16046 2:N:0:ACCTGGAT+CCACAGGT	0	0.302076	1.23292	0.914572	0.982904	1	0	0.437131	1.35391	0.877176	0.946826	1	0	0.135055	1.09813	0.958614	0.993871	1	0.6	3.05055	8.2853	0.185842	0.739844	1	0.6	2.74848	6.72008	0.174145	0.918974	1	0.6	2.61342	6.11954	0.200105	0.993629	1
f__S24-7, M70574:46:000000000-J6F43:1:1115:24897:4608 1:N:0:GTGCCATA+GTGTGTCA/M70574:46:000000000-J6F43:1:1115:24897:4608 2:N:0:GTGCCATA+GTGTGTCA	0.6	-0.684927	-1.60762	0.646299	0.982904	1	0.6	-2.52308	-5.74807	0.242677	0.76967	1	0.4	-1.83815	-3.57551	0.406078	0.993871	1	0.6	-0.360351	-1.28374	0.807476	0.90078	1	0.4	0.324575	1.2523	0.834658	0.963978	1	0.4	2.16273	4.4776	0.326287	0.993629	1
g__Ruminococcus, M70574:46:000000000-J6F43:1:1116:14779:12953 1:N:0:GTGCCATA+CACTAATG/M70574:46:000000000-J6F43:1:1116:14779:12953 2:N:0:GTGCCATA+CACTAATG	1.2	-0.697939	-1.62219	0.606784	0.982904	1	1.2	-0.721701	-1.64913	0.600858	0.946826	1	0.8	-0.0237622	-1.01661	0.986705	0.995727	1	1.2	-3.08674	-8.49575	0.133861	0.739844	1	0.8	-2.3888	-5.23723	0.253177	0.918974	1	0.6	-2.36504	-5.15167	0.261391	0.993629	1
f__Lachnospiraceae, M70574:46:000000000-J6F43:1:1116:23760:10698 1:N:0:TGAATCCG+AGGTCATT/M70574:46:000000000-J6F43:1:1116:23760:10698 2:N:0:TGAATCCG+AGGTCATT	0	0.302209	1.23303	0.915097	0.982904	1	0	0.437042	1.35383	0.878	0.946826	1	0	0.134833	1.09797	0.958994	0.993871	1	0.6	3.11326	8.65339	0.180297	0.739844	1	0.6	2.81106	7.01798	0.168652	0.918974	1	0.6	2.67622	6.3918	0.193749	0.993629	1
o__Clostridiales, M70574:46:000000000-J6F43:1:1117:16544:19707 1:N:0:TGAATCCG+TAAGATCC/M70574:46:000000000-J6F43:1:1117:16544:19707 2:N:0:TGAATCCG+TAAGATCC	1.4	0.466607	1.38186	0.753865	0.982904	1	1.2	0.18232	1.13471	0.904424	0.95783	1	1.4	-0.284287	-1.21781	0.846197	0.993871	1	1.2	-0.0599289	-1.04241	0.969124	0.984826	1	1.4	-0.526536	-1.44047	0.724961	0.963978	1	1	-0.242249	-1.18284	0.873918	0.993629	1
g__Lactobacillus, M70574:46:000000000-J6F43:1:1119:20647:11192 1:N:0:ACCTGGAT+CACTAATG/M70574:46:000000000-J6F43:1:1119:20647:11192 2:N:0:ACCTGGAT+CACTAATG	0	0.301884	1.23275	0.914317	0.982904	1	0.6	2.92111	7.57428	0.203533	0.76967	1	0.6	2.61922	6.1442	0.193207	0.993871	1	0	0.695659	1.61962	0.800217	0.90078	1	0	0.393775	1.31383	0.875642	0.963978	1	0.6	-2.22545	-4.67657	0.249618	0.993629	1
g__Adlercreutzia, M70574:46:000000000-J6F43:1:2101:8395:13733 1:N:0:ACCTGGAT+CCACAGGT/M70574:46:000000000-J6F43:1:2101:8395:13733 2:N:0:ACCTGGAT+CCACAGGT	0	0.302076	1.23292	0.914567	0.982904	1	0	0.437131	1.35391	0.877169	0.946826	1	0	0.135055	1.09813	0.958611	0.993871	1	0.6	3.05055	8.2853	0.185806	0.739844	1	0.6	2.74848	6.72008	0.174099	0.918974	1	0.6	2.61342	6.11954	0.200058	0.993629	1
g__Allobaculum, M70574:46:000000000-J6F43:1:2104:14008:18634 1:N:0:ACCTGGAT+TAAGATCC/M70574:46:000000000-J6F43:1:2104:14008:18634 2:N:0:ACCTGGAT+TAAGATCC	0	0.301932	1.23279	0.914405	0.982904	1	0.6	2.92847	7.61303	0.203079	0.76967	1	0.6	2.62654	6.17543	0.192818	0.993871	1	0	0.695976	1.61998	0.800367	0.90078	1	0	0.394044	1.31407	0.875733	0.963978	1	0.6	-2.2325	-4.69946	0.249082	0.993629	1
g__Allobaculum, M70574:46:000000000-J6F43:1:2104:26474:8191 1:N:0:GTGCCATA+TAAGATCC/M70574:46:000000000-J6F43:1:2104:26474:8191 2:N:0:GTGCCATA+TAAGATCC	0	0.30215	1.23298	0.914965	0.982904	1	0.6	2.9786	7.8822	0.199507	0.76967	1	0.6	2.67645	6.3928	0.189537	0.993871	1	0	0.697425	1.62161	0.801425	0.90078	1	0	0.395275	1.31519	0.876425	0.963978	1	0.6	-2.28117	-4.86073	0.244647	0.993629	1
g__Ruminococcus, M70574:46:000000000-J6F43:1:2105:15607:9924 1:N:0:ACCTGGAT+CCACAGGT/M70574:46:000000000-J6F43:1:2105:15607:9924 2:N:0:ACCTGGAT+CCACAGGT	0	0.302076	1.23292	0.914563	0.982904	1	0	0.437131	1.35391	0.877163	0.946826	1	0	0.135055	1.09813	0.958608	0.993871	1	0.6	3.05055	8.2853	0.185769	0.739844	1	0.6	2.74848	6.72008	0.174054	0.918974	1	0.6	2.61342	6.11954	0.200012	0.993629	1
M70574:46:000000000-J6F43:1:2105:16308:17582 1:N:0:ACCTGGAT+CACTAATG/M70574:46:000000000-J6F43:1:2105:16308:17582 2:N:0:ACCTGGAT+CACTAATG	0	0.301884	1.23275	0.914304	0.982904	1	0.6	2.92111	7.57428	0.203433	0.76967	1	0.6	2.61922	6.1442	0.193081	0.993871	1	0	0.695659	1.61962	0.800187	0.90078	1	0	0.393775	1.31383	0.87562	0.963978	1	0.6	-2.22545	-4.67657	0.249472	0.993629	1
s__animalis, M70574:46:000000000-J6F43:1:2105:4371:15448 1:N:0:GTGCCATA+AGGTCATT/M70574:46:000000000-J6F43:1:2105:4371:15448 2:N:0:GTGCCATA+AGGTCATT	0	0.301996	1.23285	0.914606	0.982904	1	0	0.437185	1.35396	0.877175	0.946826	1	0	0.135189	1.09824	0.958578	0.993871	1	0.6	3.04813	8.27138	0.186296	0.739844	1	0.6	2.74613	6.70916	0.174644	0.918974	1	0.6	2.61094	6.10903	0.200652	0.993629	1
g__Oscillospira, M70574:46:000000000-J6F43:1:2105:5843:16181 1:N:0:ACCTGGAT+AGGTCATT/M70574:46:000000000-J6F43:1:2105:5843:16181 2:N:0:ACCTGGAT+AGGTCATT	0	0.301783	1.23267	0.91406	0.982904	1	0	0.43733	1.3541	0.876269	0.946826	1	0	0.135546	1.09851	0.958128	0.993871	1	0.6	3.04633	8.26109	0.181873	0.739844	1	0.6	2.74455	6.70181	0.16906	0.918974	1	0.6	2.609	6.10082	0.194962	0.993629	1
f__Ruminococcaceae, M70574:46:000000000-J6F43:1:2106:20256:18702 1:N:0:ACCTGGAT+CCACAGGT/M70574:46:000000000-J6F43:1:2106:20256:18702 2:N:0:ACCTGGAT+CCACAGGT	0	0.302076	1.23292	0.914558	0.982904	1	0	0.437131	1.35391	0.877156	0.946826	1	0	0.135055	1.09813	0.958606	0.993871	1	0.6	3.05055	8.2853	0.185733	0.739844	1	0.6	2.74848	6.72008	0.174009	0.918974	1	0.6	2.61342	6.11954	0.199966	0.993629	1
o__Clostridiales, M70574:46:000000000-J6F43:1:2107:3620:10614 1:N:0:ACCTGGAT+AGGTCATT/M70574:46:000000000-J6F43:1:2107:3620:10614 2:N:0:ACCTGGAT+AGGTCATT	0	0.301783	1.23267	0.914066	0.982904	1	0	0.43733	1.3541	0.876278	0.946826	1	0	0.135546	1.09851	0.958131	0.993871	1	0.6	3.04633	8.26109	0.18192	0.739844	1	0.6	2.74455	6.70181	0.169118	0.918974	1	0.6	2.609	6.10082	0.195022	0.993629	1
f__[Mogibacteriaceae], M70574:46:000000000-J6F43:1:2109:3018:13954 1:N:0:ACCTGGAT+CCACAGGT/M70574:46:000000000-J6F43:1:2109:3018:13954 2:N:0:ACCTGGAT+CCACAGGT	0	0.302076	1.23292	0.914553	0.982904	1	0	0.437131	1.35391	0.877149	0.946826	1	0	0.135055	1.09813	0.958603	0.993871	1	0.6	3.05055	8.2853	0.185698	0.739844	1	0.6	2.74848	6.72008	0.173965	0.918974	1	0.6	2.61342	6.11954	0.19992	0.993629	1
f__Ruminococcaceae, M70574:46:000000000-J6F43:1:2109:7558:19979 1:N:0:ACCTGGAT+CACTAATG/M70574:46:000000000-J6F43:1:2109:7558:19979 2:N:0:ACCTGGAT+CACTAATG	0.4	-0.184945	-1.13677	0.911538	0.982904	1	0.6	0.374593	1.29647	0.815392	0.946826	1	0.6	0.559538	1.4738	0.726807	0.993871	1	1.2	1.42588	2.68678	0.344113	0.794631	1	1.2	1.61082	3.05426	0.284187	0.918974	1	1.2	1.05129	2.07238	0.464454	0.993629	1
g__Ruminococcus, M70574:46:000000000-J6F43:1:2109:7834:15857 1:N:0:ACCTGGAT+CACTAATG/M70574:46:000000000-J6F43:1:2109:7834:15857 2:N:0:ACCTGGAT+CACTAATG	0	0.301884	1.23275	0.914291	0.982904	1	0.6	2.92111	7.57428	0.203334	0.76967	1	0.6	2.61922	6.1442	0.192956	0.993871	1	0	0.695659	1.61962	0.800156	0.90078	1	0	0.393775	1.31383	0.875597	0.963978	1	0.6	-2.22545	-4.67657	0.249326	0.993629	1
g__Allobaculum, M70574:46:000000000-J6F43:1:2110:11576:16004 1:N:0:ACCTGGAT+CACTAATG/M70574:46:000000000-J6F43:1:2110:11576:16004 2:N:0:ACCTGGAT+CACTAATG	0	0.302505	1.23328	0.915911	0.982904	1	1	3.43387	10.8068	0.140935	0.76967	1	1	3.13136	8.76261	0.126833	0.993871	1	0	0.699791	1.62427	0.80324	0.90078	1	0	0.397285	1.31703	0.877615	0.963978	1	1	-2.73408	-6.65333	0.165508	0.993629	1
o__Clostridiales, M70574:46:000000000-J6F43:1:2112:16535:7337 1:N:0:ACCTGGAT+AGGTCATT/M70574:46:000000000-J6F43:1:2112:16535:7337 2:N:0:ACCTGGAT+AGGTCATT	0	0.301765	1.23265	0.91431	0.982904	1	0	0.437342	1.35411	0.876612	0.946826	1	0	0.135578	1.09853	0.958255	0.993871	1	1	3.66966	12.7256	0.10263	0.739844	1	1	3.36789	10.3237	0.0852452	0.918974	1	1	3.23231	9.39774	0.101635	0.993629	1
f__Lachnospiraceae, M70574:46:000000000-J6F43:1:2113:14836:20596 1:N:0:GTGCCATA+CCACAGGT/M70574:46:000000000-J6F43:1:2113:14836:20596 2:N:0:GTGCCATA+CCACAGGT	0	0.302437	1.23323	0.915265	0.982904	1	0	0.436894	1.35369	0.878375	0.946826	1	0	0.134457	1.09768	0.959238	0.993871	1	0.6	3.21989	9.31713	0.166115	0.739844	1	0.6	2.91745	7.55509	0.153413	0.918974	1	0.6	2.78299	6.88278	0.176916	0.993629	1
g__Allobaculum, M70574:46:000000000-J6F43:1:2113:16372:8813 1:N:0:ACCTGGAT+CACTAATG/M70574:46:000000000-J6F43:1:2113:16372:8813 2:N:0:ACCTGGAT+CACTAATG	0	0.301884	1.23275	0.914279	0.982904	1	0.6	2.92111	7.57428	0.203234	0.76967	1	0.6	2.61922	6.1442	0.192831	0.993871	1	0	0.695659	1.61962	0.800126	0.90078	1	0	0.393775	1.31383	0.875575	0.963978	1	0.6	-2.22545	-4.67657	0.249181	0.993629	1
f__Lachnospiraceae, M70574:46:000000000-J6F43:1:2113:23529:13867 1:N:0:ACCTGGAT+AGGTCATT/M70574:46:000000000-J6F43:1:2113:23529:13867 2:N:0:ACCTGGAT+AGGTCATT	0	0.301925	1.23279	0.915182	0.982904	1	0.4	2.46998	5.54035	0.298909	0.76967	1	0.4	2.16805	4.49416	0.302703	0.993871	1	0.6	3.02014	8.11247	0.195127	0.739844	1	0.6	2.71822	6.58059	0.185006	0.918974	1	0.6	0.550164	1.46425	0.683647	0.993629	1
f__[Mogibacteriaceae], M70574:46:000000000-J6F43:1:2114:25302:16938 1:N:0:GTGCCATA+CCACAGGT/M70574:46:000000000-J6F43:1:2114:25302:16938 2:N:0:GTGCCATA+CCACAGGT	0	0.302437	1.23323	0.915267	0.982904	1	0	0.436894	1.35369	0.878378	0.946826	1	0	0.134457	1.09768	0.959239	0.993871	1	0.6	3.21989	9.31713	0.16613	0.739844	1	0.6	2.91745	7.55509	0.153432	0.918974	1	0.6	2.78299	6.88278	0.176935	0.993629	1
g__Allobaculum, M70574:46:000000000-J6F43:1:2117:28201:11368 1:N:0:ACCTGGAT+CACTAATG/M70574:46:000000000-J6F43:1:2117:28201:11368 2:N:0:ACCTGGAT+CACTAATG	0	0.301884	1.23275	0.914266	0.982904	1	0.6	2.92111	7.57428	0.203135	0.76967	1	0.6	2.61922	6.1442	0.192706	0.993871	1	0	0.695659	1.61962	0.800095	0.90078	1	0	0.393775	1.31383	0.875552	0.963978	1	0.6	-2.22545	-4.67657	0.249036	0.993629	1
o__Clostridiales, M70574:46:000000000-J6F43:1:2118:29315:10084 1:N:0:GCCTGGAT+CACTAATG/M70574:46:000000000-J6F43:1:2118:29315:10084 2:N:0:GCCTGGAT+CACTAATG	0	0.301884	1.23275	0.914253	0.982904	1	0.6	2.92111	7.57428	0.203036	0.76967	1	0.6	2.61922	6.1442	0.192581	0.993871	1	0	0.695659	1.61962	0.800065	0.90078	1	0	0.393775	1.31383	0.87553	0.963978	1	0.6	-2.22545	-4.67657	0.248891	0.993629	1
g__Candidatus Arthromitus, M70574:46:000000000-J6F43:1:1101:10484:13028 1:N:0:GTGCCATA+CCACAGGT/M70574:46:000000000-J6F43:1:1101:10484:13028 2:N:0:GTGCCATA+CCACAGGT	0	0.301765	1.23265	0.912655	0.982904	1	0	0.437342	1.35411	0.874267	0.946826	1	0	0.135578	1.09853	0.957326	0.993871	1	0.4	2.60017	6.06358	0.252242	0.739844	1	0.4	2.29841	4.91914	0.246826	0.918974	1	0.4	2.16283	4.47792	0.280052	0.993629	1
s__C21_c20, M70574:46:000000000-J6F43:1:1101:14991:18912 1:N:0:ACCTGGAT+AGGTCATT/M70574:46:000000000-J6F43:1:1101:14991:18912 2:N:0:ACCTGGAT+AGGTCATT	0	0.301765	1.23265	0.912655	0.982904	1	0	0.437342	1.35411	0.874267	0.946826	1	0	0.135578	1.09853	0.957326	0.993871	1	0.4	2.59972	6.06167	0.252336	0.739844	1	0.4	2.29795	4.91759	0.246934	0.918974	1	0.4	2.16237	4.47651	0.280168	0.993629	1
o__Clostridiales, M70574:46:000000000-J6F43:1:1102:10655:9274 1:N:0:ACCTGGAT+AGGTCATT/M70574:46:000000000-J6F43:1:1102:10655:9274 2:N:0:ACCTGGAT+AGGTCATT	0	0.302158	1.23299	0.914565	0.982904	1	0	0.437076	1.35386	0.877217	0.946826	1	0	0.134918	1.09803	0.958665	0.993871	1	0.8	3.30946	9.91397	0.147798	0.739844	1	0.8	3.00731	8.04061	0.132749	0.918974	1	0.8	2.87239	7.32276	0.154622	0.993629	1
s__pseudolongum, M70574:46:000000000-J6F43:1:1102:22954:20139 1:N:0:ACCTGGAT+CCACAGGT/M70574:46:000000000-J6F43:1:1102:22954:20139 2:N:0:ACCTGGAT+CCACAGGT	0	0.301765	1.23265	0.912655	0.982904	1	0	0.437342	1.35411	0.874267	0.946826	1	0	0.135578	1.09853	0.957326	0.993871	1	0.4	2.59991	6.06248	0.252296	0.739844	1	0.4	2.29814	4.91825	0.246888	0.918974	1	0.4	2.16257	4.47711	0.280119	0.993629	1
f__Coriobacteriaceae, M70574:46:000000000-J6F43:1:1102:8325:9967 1:N:0:GTGCCATA+AGGTCATT/M70574:46:000000000-J6F43:1:1102:8325:9967 2:N:0:GTGCCATA+AGGTCATT	0	0.301765	1.23265	0.912655	0.982904	1	0	0.437342	1.35411	0.874267	0.946826	1	0	0.135578	1.09853	0.957326	0.993871	1	0.4	2.5999	6.06243	0.252299	0.739844	1	0.4	2.29813	4.91821	0.246891	0.918974	1	0.4	2.16255	4.47707	0.280122	0.993629	1
M70574:46:000000000-J6F43:1:1103:25222:19240 1:N:0:GTGCCATA+CACTAATG/M70574:46:000000000-J6F43:1:1103:25222:19240 2:N:0:GTGCCATA+CACTAATG	0	0.301765	1.23265	0.912678	0.982904	1	0.4	2.47903	5.57521	0.276372	0.76967	1	0.4	2.17726	4.52295	0.274381	0.993871	1	0	0.694867	1.61874	0.796437	0.90078	1	0	0.393102	1.31321	0.872888	0.963978	1	0.4	-1.78416	-3.44418	0.350463	0.993629	1
f__Ruminococcaceae, M70574:46:000000000-J6F43:1:1105:10781:15545 1:N:0:ACCTGGAT+AGGTCATT/M70574:46:000000000-J6F43:1:1105:10781:15545 2:N:0:ACCTGGAT+AGGTCATT	0	0.302158	1.23299	0.914518	0.982904	1	0	0.437076	1.35386	0.87715	0.946826	1	0	0.134918	1.09803	0.958639	0.993871	1	0.8	3.30946	9.91397	0.147461	0.739844	1	0.8	3.00731	8.04061	0.132337	0.918974	1	0.8	2.87239	7.32276	0.154192	0.993629	1
o__Clostridiales, M70574:46:000000000-J6F43:1:1105:18788:16784 1:N:0:ACCTGGAT+CACTAATG/M70574:46:000000000-J6F43:1:1105:18788:16784 2:N:0:ACCTGGAT+CACTAATG	0	0.301765	1.23265	0.912655	0.982904	1	0.4	2.47868	5.57388	0.27626	0.76967	1	0.4	2.17692	4.52186	0.274229	0.993871	1	0	0.694867	1.61874	0.796381	0.90078	1	0	0.393102	1.31321	0.872847	0.963978	1	0.4	-1.78381	-3.44335	0.350305	0.993629	1
f__Lachnospiraceae, M70574:46:000000000-J6F43:1:1105:8480:4211 1:N:0:ACCTGGAT+CACTAATG/M70574:46:000000000-J6F43:1:1105:8480:4211 2:N:0:ACCTGGAT+CACTAATG	0	0.301765	1.23265	0.912655	0.982904	1	0.4	2.47868	5.57388	0.27626	0.76967	1	0.4	2.17692	4.52186	0.274229	0.993871	1	0	0.694867	1.61874	0.796381	0.90078	1	0	0.393102	1.31321	0.872847	0.963978	1	0.4	-1.78381	-3.44335	0.350305	0.993629	1
o__Clostridiales, M70574:46:000000000-J6F43:1:1106:5356:10495 1:N:0:ACCTGGAT+AGGTCATT/M70574:46:000000000-J6F43:1:1106:5356:10495 2:N:0:ACCTGGAT+AGGTCATT	0	0.301765	1.23265	0.912655	0.982904	1	0	0.437342	1.35411	0.874267	0.946826	1	0	0.135578	1.09853	0.957326	0.993871	1	0.4	2.59972	6.06167	0.252336	0.739844	1	0.4	2.29795	4.91759	0.246934	0.918974	1	0.4	2.16237	4.47651	0.280168	0.993629	1
o__RF39, M70574:46:000000000-J6F43:1:1108:12225:11542 1:N:0:TGAATCCG+TAAGATCC/M70574:46:000000000-J6F43:1:1108:12225:11542 2:N:0:TGAATCCG+TAAGATCC	0	0.301765	1.23265	0.913159	0.982904	1	0.4	2.47896	5.57494	0.280253	0.76967	1	0.4	2.17719	4.52272	0.279332	0.993871	1	0	0.694867	1.61874	0.797593	0.90078	1	0	0.393102	1.31321	0.873749	0.963978	1	0.4	-1.78409	-3.44401	0.355891	0.993629	1
s__pseudolongum, M70574:46:000000000-J6F43:1:1109:8247:12252 1:N:0:ACCTGGAT+CCACAGGT/M70574:46:000000000-J6F43:1:1109:8247:12252 2:N:0:ACCTGGAT+CCACAGGT	0	0.301765	1.23265	0.912655	0.982904	1	0	0.437342	1.35411	0.874267	0.946826	1	0	0.135578	1.09853	0.957326	0.993871	1	0.4	2.59991	6.06248	0.252296	0.739844	1	0.4	2.29814	4.91825	0.246888	0.918974	1	0.4	2.16257	4.47711	0.280119	0.993629	1
g__Lactobacillus, M70574:46:000000000-J6F43:1:1110:23831:24137 1:N:0:GTGCCATA+AGGTCATT/M70574:46:000000000-J6F43:1:1110:23831:24137 2:N:0:GTGCCATA+AGGTCATT	0	0.301765	1.23265	0.912655	0.982904	1	0	0.437342	1.35411	0.874267	0.946826	1	0	0.135578	1.09853	0.957326	0.993871	1	0.4	2.5999	6.06243	0.252299	0.739844	1	0.4	2.29813	4.91821	0.246891	0.918974	1	0.4	2.16255	4.47707	0.280122	0.993629	1
o__Clostridiales, M70574:46:000000000-J6F43:1:1112:13371:15466 1:N:0:ACCTGGAT+TAAGATCC/M70574:46:000000000-J6F43:1:1112:13371:15466 2:N:0:ACCTGGAT+TAAGATCC	0	0.301765	1.23265	0.912655	0.982904	1	0.4	2.47877	5.57423	0.27624	0.76967	1	0.4	2.17701	4.52215	0.274206	0.993871	1	0	0.694867	1.61874	0.796381	0.90078	1	0	0.393102	1.31321	0.872847	0.963978	1	0.4	-1.78391	-3.44357	0.350277	0.993629	1
f__Ruminococcaceae, M70574:46:000000000-J6F43:1:1112:21496:18433 1:N:0:GTGCCATA+CCGATCTT/M70574:46:000000000-J6F43:1:1112:21496:18433 2:N:0:GTGCCATA+CCGATCTT	0.8	0.745197	1.6762	0.557604	0.982904	1	0.4	-1.94668	-3.85487	0.354057	0.76967	1	0.8	-2.69188	-6.46154	0.1789	0.993871	1	0.4	-1.68916	-3.22468	0.400035	0.794631	1	0.8	-2.43435	-5.40522	0.201173	0.918974	1	0	0.257525	1.19543	0.919073	0.993629	1
f__S24-7, M70574:46:000000000-J6F43:1:1112:9425:8288 1:N:0:GTGCCATA+TAAGATCC/M70574:46:000000000-J6F43:1:1112:9425:8288 2:N:0:GTGCCATA+TAAGATCC	0	0.301765	1.23265	0.912838	0.982904	1	0.4	2.47895	5.57492	0.277674	0.76967	1	0.4	2.17719	4.52271	0.276044	0.993871	1	0	0.694867	1.61874	0.796822	0.90078	1	0	0.393102	1.31321	0.873175	0.963978	1	0.4	-1.78409	-3.444	0.35229	0.993629	1
s__ruminis, M70574:46:000000000-J6F43:1:1113:15619:20203 1:N:0:ACCTGGAT+AGGTCATT/M70574:46:000000000-J6F43:1:1113:15619:20203 2:N:0:ACCTGGAT+AGGTCATT	0	0.301765	1.23265	0.912655	0.982904	1	0	0.437342	1.35411	0.874267	0.946826	1	0	0.135578	1.09853	0.957326	0.993871	1	0.4	2.59972	6.06167	0.252336	0.739844	1	0.4	2.29795	4.91759	0.246934	0.918974	1	0.4	2.16237	4.47651	0.280168	0.993629	1
g__Coprococcus, M70574:46:000000000-J6F43:1:1113:20890:19933 1:N:0:ACCTGGAT+CACTAATG/M70574:46:000000000-J6F43:1:1113:20890:19933 2:N:0:ACCTGGAT+CACTAATG	0	0.301765	1.23265	0.912655	0.982904	1	0.4	2.47868	5.57388	0.27626	0.76967	1	0.4	2.17692	4.52186	0.274229	0.993871	1	0	0.694867	1.61874	0.796381	0.90078	1	0	0.393102	1.31321	0.872847	0.963978	1	0.4	-1.78381	-3.44335	0.350305	0.993629	1
s__C21_c20, M70574:46:000000000-J6F43:1:1113:27389:7776 1:N:0:GTGCCATA+CCACAGGT/M70574:46:000000000-J6F43:1:1113:27389:7776 2:N:0:GTGCCATA+CCACAGGT	0	0.301765	1.23265	0.912655	0.982904	1	0	0.437342	1.35411	0.874267	0.946826	1	0	0.135578	1.09853	0.957326	0.993871	1	0.4	2.60017	6.06358	0.252242	0.739844	1	0.4	2.29841	4.91914	0.246826	0.918974	1	0.4	2.16283	4.47792	0.280052	0.993629	1
g__Coprococcus, M70574:46:000000000-J6F43:1:1114:24987:5332 1:N:0:ACCTGGAT+AGGTCATT/M70574:46:000000000-J6F43:1:1114:24987:5332 2:N:0:ACCTGGAT+AGGTCATT	0	0.301765	1.23265	0.912655	0.982904	1	0	0.437342	1.35411	0.874267	0.946826	1	0	0.135578	1.09853	0.957326	0.993871	1	0.4	2.59972	6.06167	0.252336	0.739844	1	0.4	2.29795	4.91759	0.246934	0.918974	1	0.4	2.16237	4.47651	0.280168	0.993629	1
s__pseudolongum, M70574:46:000000000-J6F43:1:1114:2834:13532 1:N:0:ACCTGGAT+CCACAGGT/M70574:46:000000000-J6F43:1:1114:2834:13532 2:N:0:ACCTGGAT+CCACAGGT	0	0.301765	1.23265	0.912655	0.982904	1	0	0.437342	1.35411	0.874267	0.946826	1	0	0.135578	1.09853	0.957326	0.993871	1	0.4	2.59991	6.06248	0.252296	0.739844	1	0.4	2.29814	4.91825	0.246888	0.918974	1	0.4	2.16257	4.47711	0.280119	0.993629	1
f__S24-7, M70574:46:000000000-J6F43:1:1115:17063:12499 1:N:0:ACCTGGAT+CACTAATG/M70574:46:000000000-J6F43:1:1115:17063:12499 2:N:0:ACCTGGAT+CACTAATG	0	0.301765	1.23265	0.912655	0.982904	1	0.4	2.47868	5.57388	0.27626	0.76967	1	0.4	2.17692	4.52186	0.274229	0.993871	1	0	0.694867	1.61874	0.796381	0.90078	1	0	0.393102	1.31321	0.872847	0.963978	1	0.4	-1.78381	-3.44335	0.350305	0.993629	1
g__Streptococcus, M70574:46:000000000-J6F43:1:1115:7109:21902 1:N:0:GTGCCATA+CACTAATG/M70574:46:000000000-J6F43:1:1115:7109:21902 2:N:0:GTGCCATA+CACTAATG	0	0.301765	1.23265	0.912685	0.982904	1	0.4	2.47903	5.57521	0.276425	0.76967	1	0.4	2.17726	4.52295	0.274449	0.993871	1	0	0.694867	1.61874	0.796453	0.90078	1	0	0.393102	1.31321	0.8729	0.963978	1	0.4	-1.78416	-3.44418	0.350537	0.993629	1
g__Coprobacillus, M70574:46:000000000-J6F43:1:1116:24010:13996 1:N:0:ACCTGGAT+CACTAATG/M70574:46:000000000-J6F43:1:1116:24010:13996 2:N:0:ACCTGGAT+CACTAATG	0	0.301765	1.23265	0.912655	0.982904	1	0.4	2.47868	5.57388	0.27626	0.76967	1	0.4	2.17692	4.52186	0.274229	0.993871	1	0	0.694867	1.61874	0.796381	0.90078	1	0	0.393102	1.31321	0.872847	0.963978	1	0.4	-1.78381	-3.44335	0.350305	0.993629	1
f__S24-7, M70574:46:000000000-J6F43:1:1118:7944:11276 1:N:0:GTGCCATA+CCACAGGT/M70574:46:000000000-J6F43:1:1118:7944:11276 2:N:0:GTGCCATA+CCACAGGT	0	0.301765	1.23265	0.912655	0.982904	1	0	0.437342	1.35411	0.874267	0.946826	1	0	0.135578	1.09853	0.957326	0.993871	1	0.4	2.60017	6.06358	0.252242	0.739844	1	0.4	2.29841	4.91914	0.246826	0.918974	1	0.4	2.16283	4.47792	0.280052	0.993629	1
f__Ruminococcaceae, M70574:46:000000000-J6F43:1:2101:8679:10420 1:N:0:ACCTGGAT+CCACAGGT/M70574:46:000000000-J6F43:1:2101:8679:10420 2:N:0:ACCTGGAT+CCACAGGT	0	0.301765	1.23265	0.912655	0.982904	1	0	0.437342	1.35411	0.874267	0.946826	1	0	0.135578	1.09853	0.957326	0.993871	1	0.4	2.59991	6.06248	0.252296	0.739844	1	0.4	2.29814	4.91825	0.246888	0.918974	1	0.4	2.16257	4.47711	0.280119	0.993629	1
f__Ruminococcaceae, M70574:46:000000000-J6F43:1:2105:19865:11941 1:N:0:ACCTGGAT+AGGTCATT/M70574:46:000000000-J6F43:1:2105:19865:11941 2:N:0:ACCTGGAT+AGGTCATT	0	0.301765	1.23265	0.91402	0.982904	1	0.4	2.47877	5.57423	0.287221	0.76967	1	0.4	2.17701	4.52215	0.288169	0.993871	1	0.4	2.59972	6.06167	0.263346	0.739844	1	0.4	2.29795	4.91759	0.260923	0.918974	1	0.4	0.120943	1.08745	0.928003	0.993629	1
f__Ruminococcaceae, M70574:46:000000000-J6F43:1:2105:26109:14062 1:N:0:GTGCCATA+AGGTCATT/M70574:46:000000000-J6F43:1:2105:26109:14062 2:N:0:GTGCCATA+AGGTCATT	0	0.301765	1.23265	0.912655	0.982904	1	0	0.437342	1.35411	0.874267	0.946826	1	0	0.135578	1.09853	0.957326	0.993871	1	0.4	2.5999	6.06243	0.252299	0.739844	1	0.4	2.29813	4.91821	0.246891	0.918974	1	0.4	2.16255	4.47707	0.280122	0.993629	1
g__Coprococcus, M70574:46:000000000-J6F43:1:2105:5187:14267 1:N:0:ACCTGGAT+TAAGATCC/M70574:46:000000000-J6F43:1:2105:5187:14267 2:N:0:ACCTGGAT+TAAGATCC	0	0.301765	1.23265	0.912655	0.982904	1	0.4	2.47877	5.57423	0.27624	0.76967	1	0.4	2.17701	4.52215	0.274206	0.993871	1	0	0.694867	1.61874	0.796381	0.90078	1	0	0.393102	1.31321	0.872847	0.963978	1	0.4	-1.78391	-3.44357	0.350277	0.993629	1
f__S24-7, M70574:46:000000000-J6F43:1:2107:20038:17381 1:N:0:TGAATCCG+TTCTAGAC/M70574:46:000000000-J6F43:1:2107:20038:17381 2:N:0:TGAATCCG+TTCTAGAC	7.2	-0.454233	-1.37005	0.607207	0.982904	1	7.2	-1.69507	-3.23792	0.0736515	0.76967	1	5.8	-1.24083	-2.36335	0.192593	0.993871	1	7.2	-1.05823	-2.08237	0.248171	0.739844	1	5.8	-0.603997	-1.51992	0.512062	0.963978	1	3.2	0.636836	1.55492	0.516998	0.993629	1
M70574:46:000000000-J6F43:1:2109:23440:7159 1:N:0:GTGCCATA+CACTAATG/M70574:46:000000000-J6F43:1:2109:23440:7159 2:N:0:GTGCCATA+CACTAATG	0	0.301765	1.23265	0.912688	0.982904	1	0.4	2.47903	5.57521	0.276448	0.76967	1	0.4	2.17726	4.52295	0.274479	0.993871	1	0	0.694867	1.61874	0.79646	0.90078	1	0	0.393102	1.31321	0.872906	0.963978	1	0.4	-1.78416	-3.44418	0.35057	0.993629	1
g__Allobaculum, M70574:46:000000000-J6F43:1:2109:25330:11860 1:N:0:ACCTGGAT+CACTAATG/M70574:46:000000000-J6F43:1:2109:25330:11860 2:N:0:ACCTGGAT+CACTAATG	0	0.301765	1.23265	0.912655	0.982904	1	0.4	2.47868	5.57388	0.27626	0.76967	1	0.4	2.17692	4.52186	0.274229	0.993871	1	0	0.694867	1.61874	0.796381	0.90078	1	0	0.393102	1.31321	0.872847	0.963978	1	0.4	-1.78381	-3.44335	0.350305	0.993629	1
g__Allobaculum, M70574:46:000000000-J6F43:1:2110:14722:10845 1:N:0:ACCTGGAT+CACTAATG/M70574:46:000000000-J6F43:1:2110:14722:10845 2:N:0:ACCTGGAT+CACTAATG	0	0.301765	1.23265	0.912655	0.982904	1	0.4	2.47868	5.57388	0.27626	0.76967	1	0.4	2.17692	4.52186	0.274229	0.993871	1	0	0.694867	1.61874	0.796381	0.90078	1	0	0.393102	1.31321	0.872847	0.963978	1	0.4	-1.78381	-3.44335	0.350305	0.993629	1
f__Ruminococcaceae, M70574:46:000000000-J6F43:1:2110:16350:10886 1:N:0:ACCTGGAT+CCACAGGT/M70574:46:000000000-J6F43:1:2110:16350:10886 2:N:0:ACCTGGAT+CCACAGGT	0	0.301765	1.23265	0.912655	0.982904	1	0	0.437342	1.35411	0.874267	0.946826	1	0	0.135578	1.09853	0.957326	0.993871	1	0.4	2.59991	6.06248	0.252296	0.739844	1	0.4	2.29814	4.91825	0.246888	0.918974	1	0.4	2.16257	4.47711	0.280119	0.993629	1
g__Coprococcus, M70574:46:000000000-J6F43:1:2114:5516:16608 1:N:0:ACCTGGAT+TAAGATCC/M70574:46:000000000-J6F43:1:2114:5516:16608 2:N:0:ACCTGGAT+TAAGATCC	0	0.301765	1.23265	0.912655	0.982904	1	0.4	2.47877	5.57423	0.27624	0.76967	1	0.4	2.17701	4.52215	0.274206	0.993871	1	0	0.694867	1.61874	0.796381	0.90078	1	0	0.393102	1.31321	0.872847	0.963978	1	0.4	-1.78391	-3.44357	0.350277	0.993629	1
f__Lachnospiraceae, M70574:46:000000000-J6F43:1:2117:5045:19213 1:N:0:ACCTGGAT+AGGTCATT/M70574:46:000000000-J6F43:1:2117:5045:19213 2:N:0:ACCTGGAT+AGGTCATT	0	0.301765	1.23265	0.912655	0.982904	1	0	0.437342	1.35411	0.874267	0.946826	1	0	0.135578	1.09853	0.957326	0.993871	1	0.4	2.59972	6.06167	0.252336	0.739844	1	0.4	2.29795	4.91759	0.246934	0.918974	1	0.4	2.16237	4.47651	0.280168	0.993629	1
f__S24-7, 265322	11.4	-0.0789528	-1.05625	0.923045	0.983584	1	11.4	-0.420444	-1.33834	0.6109	0.946826	1	11.2	-0.341491	-1.26707	0.678285	0.993871	1	11.4	-0.39411	-1.31413	0.63417	0.90078	1	11.2	-0.315158	-1.24415	0.702489	0.963978	1	7.8	0.0263336	1.01842	0.974812	0.997082	1
o__Clostridiales, 273806	0.8	-0.119908	-1.08667	0.924784	0.983843	1	0.8	-2.75291	-6.74074	0.189071	0.76967	1	0.8	-2.633	-6.20314	0.207678	0.993871	1	0.8	-2.49302	-5.62953	0.213073	0.739844	1	0.8	-2.37311	-5.18056	0.23434	0.918974	1	0	0.259891	1.19739	0.920392	0.993629	1
f__S24-7, 192316	2	-0.123675	-1.08951	0.924884	0.983843	1	2	-0.184121	-1.13612	0.889453	0.9488	1	1.8	-0.0604466	-1.04279	0.963411	0.993871	1	2.4	0.587444	1.50258	0.648955	0.90078	1	2.4	0.711119	1.63707	0.579489	0.963978	1	2.4	0.771566	1.70712	0.551765	0.993629	1
f__S24-7, 177115	3.2	0.11002	1.07924	0.925425	0.983843	1	2.6	-1.48068	-2.79081	0.257323	0.76967	1	3.2	-1.5907	-3.01196	0.21827	0.993871	1	2.6	-0.494589	-1.40892	0.68592	0.90078	1	3.2	-0.604609	-1.52057	0.616387	0.963978	1	1.6	0.986095	1.98082	0.460297	0.993629	1
o__Clostridiales, 175365	0.8	-0.10957	-1.07891	0.92634	0.984058	1	0.8	-2.80153	-6.97182	0.171796	0.76967	1	0.8	-2.69196	-6.46193	0.187754	0.993871	1	0.8	-2.54401	-5.83208	0.193122	0.739844	1	0.8	-2.43444	-5.40554	0.211383	0.918974	1	0	0.257525	1.19543	0.920111	0.993629	1
s__muciniphila, 193829	1.2	-0.137263	-1.09982	0.927813	0.984645	1	1.8	0.439101	1.35576	0.767465	0.946826	1	1.8	0.576364	1.49109	0.696266	0.993871	1	1	-1.67654	-3.19661	0.346118	0.794631	1	1.2	-1.53928	-2.9065	0.385133	0.918974	1	1.8	-2.11564	-4.33384	0.225817	0.993629	1
f__[Mogibacteriaceae], 2797565	7.8	-0.094643	-1.0678	0.928319	0.984645	1	7.8	-0.461592	-1.37706	0.664576	0.946826	1	7.8	-0.366949	-1.28962	0.729419	0.993871	1	7.8	-0.424973	-1.34255	0.690326	0.90078	1	7.8	-0.33033	-1.2573	0.755985	0.963978	1	4.6	0.0366182	1.02571	0.972835	0.997082	1
g__Oscillospira, 1110378	8	-0.0835486	-1.05962	0.931304	0.985541	1	7.8	-1.01479	-2.02061	0.311739	0.76967	1	8	-0.931239	-1.90691	0.351313	0.993871	1	7.8	-1.55668	-2.94177	0.133598	0.739844	1	8	-1.47313	-2.77624	0.154183	0.918974	1	3.4	-0.541895	-1.45588	0.611131	0.993629	1
f__Ruminococcaceae, 181349	5.4	-0.0891327	-1.06373	0.930022	0.985541	1	4.2	-0.252803	-1.19152	0.805276	0.946826	1	5.4	-0.16367	-1.12013	0.872544	0.993871	1	6.6	0.368363	1.29089	0.715246	0.90078	1	6.6	0.457495	1.37316	0.648749	0.963978	1	6.6	0.621166	1.53812	0.540539	0.993629	1
o__Clostridiales, 174959	11.8	0.103271	1.07421	0.930637	0.985541	1	9.8	-0.712227	-1.63833	0.553954	0.946826	1	11.8	-0.815498	-1.75991	0.496072	0.993871	1	9.8	-0.316402	-1.24522	0.791573	0.90078	1	11.8	-0.419673	-1.33762	0.724761	0.963978	1	7.8	0.395825	1.31569	0.743326	0.993629	1
f__S24-7, 191584	15	-0.0599593	-1.04244	0.935344	0.989058	1	13.4	-0.0921719	-1.06597	0.901126	0.955803	1	15	-0.0322126	-1.02258	0.965221	0.993871	1	15	0.333751	1.26029	0.650857	0.90078	1	15	0.39371	1.31377	0.591844	0.963978	1	15	0.425922	1.34343	0.563378	0.993629	1
f__S24-7, 1106101	8363.8	-0.0348992	-1.02449	0.950248	0.989667	1	8363.8	-0.182376	-1.13475	0.744381	0.946826	1	8206.2	-0.147477	-1.10763	0.792036	0.993871	1	8363.8	-0.171123	-1.12593	0.759653	0.90078	1	8206.2	-0.136224	-1.09902	0.807582	0.963978	1	6440	0.0112533	1.00783	0.983949	0.99803	1
g__Ruminococcus, 405780	1.4	-0.109973	-1.07921	0.947006	0.989667	1	6.2	1.91422	3.7691	0.226267	0.76967	1	6.2	2.0242	4.06765	0.197805	0.993871	1	5.6	2.1495	4.43673	0.173606	0.739844	1	5.6	2.25947	4.78816	0.149978	0.918974	1	6.2	0.235276	1.17713	0.874765	0.993629	1
g__Oscillospira, 356187	0.4	-0.0623752	-1.04418	0.968785	0.989667	1	0.4	0.169086	1.12435	0.914895	0.965047	1	0.4	0.231462	1.17402	0.881886	0.993871	1	0.6	0.638753	1.55698	0.675162	0.90078	1	0.6	0.701128	1.62578	0.639948	0.963978	1	0.6	0.469667	1.38479	0.752021	0.993629	1
g__Oscillospira, 350256	0.6	-0.0900307	-1.06439	0.946664	0.989667	1	0.6	-2.36881	-5.16515	0.262013	0.76967	1	0.6	-2.27878	-4.85268	0.278227	0.993871	1	0.6	-2.10777	-4.31023	0.296254	0.752776	1	0.6	-2.01774	-4.04948	0.31477	0.918974	1	0	0.261045	1.19835	0.919535	0.993629	1
o__Clostridiales, 349874	1.8	0.0870892	1.06222	0.948268	0.989667	1	1.4	-1.41126	-2.65969	0.352417	0.76967	1	1.8	-1.49834	-2.82518	0.317203	0.993871	1	1.4	-0.376432	-1.29813	0.787675	0.90078	1	1.8	-0.463522	-1.3789	0.736283	0.963978	1	1	1.03482	2.04886	0.503772	0.993629	1
f__Lachnospiraceae, 346098	0.8	-0.0807457	-1.05756	0.954742	0.989667	1	1.6	1.05681	2.08033	0.430802	0.839864	1	1.6	1.13756	2.20008	0.390562	0.993871	1	2	1.27172	2.41449	0.340764	0.794631	1	2	1.35246	2.55347	0.30493	0.918974	1	2	0.214903	1.16063	0.861311	0.993629	1
o__Clostridiales, 340600	0.4	-0.100277	-1.07198	0.944962	0.989667	1	0.4	-1.97226	-3.92382	0.355949	0.76967	1	0.4	-1.87198	-3.66035	0.37847	0.993871	1	0.4	-1.71405	-3.28081	0.401903	0.794631	1	0.4	-1.61377	-3.06051	0.427395	0.918974	1	0	0.258209	1.19599	0.919877	0.993629	1
o__Clostridiales, 331786	0.4	-0.0647253	-1.04589	0.962296	0.989667	1	0.4	-1.94668	-3.85487	0.349772	0.76967	1	0.4	-1.88196	-3.68574	0.362531	0.993871	1	0.4	-1.68916	-3.22468	0.39539	0.794631	1	0.4	-1.62443	-3.0832	0.410005	0.918974	1	0	0.257525	1.19543	0.918584	0.993629	1
g__Oscillospira, 328905	2	-0.0534041	-1.03771	0.968884	0.989667	1	1.6	-1.63151	-3.09838	0.292966	0.76967	1	2	-1.57811	-2.98578	0.305765	0.993871	1	2.2	0.297727	1.22921	0.827228	0.913921	1	2.2	0.351131	1.27556	0.795107	0.963978	1	2.2	1.92924	3.80855	0.209255	0.993629	1
o__Clostridiales, 321768	3.6	0.0513224	1.03621	0.967802	0.989667	1	3	0.0814757	1.0581	0.949106	0.97244	1	3.6	0.0301533	1.02112	0.980962	0.995377	1	3.2	0.427574	1.34497	0.735856	0.90078	1	3.6	0.376251	1.29796	0.764238	0.963978	1	3.2	0.346098	1.27112	0.783488	0.993629	1
o__YS2, 310781	2.4	0.0748618	1.05326	0.948252	0.989667	1	1.6	-0.590252	-1.50551	0.626791	0.946826	1	2.4	-0.665114	-1.58569	0.577948	0.993871	1	2.4	0.489787	1.40424	0.668911	0.90078	1	2.4	0.414926	1.33323	0.712437	0.963978	1	2.4	1.08004	2.11409	0.363114	0.993629	1
o__Clostridiales, 299171	0.4	-0.0644278	-1.04567	0.96409	0.989667	1	0.4	-1.94668	-3.85487	0.35923	0.76967	1	0.4	-1.88225	-3.6865	0.371823	0.993871	1	0.4	-1.68916	-3.22468	0.40562	0.794631	1	0.4	-1.62473	-3.08384	0.420015	0.918974	1	0	0.257525	1.19543	0.919665	0.993629	1
o__Clostridiales, 277202	0.4	-0.0645004	-1.04572	0.964182	0.989667	1	0.4	-1.94675	-3.85506	0.360023	0.76967	1	0.4	-1.88225	-3.6865	0.37263	0.993871	1	0.4	-1.68923	-3.22484	0.406474	0.794631	1	0.4	-1.62473	-3.08384	0.420881	0.918974	1	0	0.257525	1.19543	0.919759	0.993629	1
f__S24-7, 275631	1.2	-0.0544891	-1.03849	0.967444	0.989667	1	1.2	-3.38611	-10.4549	0.120229	0.76967	1	1.2	-3.33162	-10.0674	0.12479	0.993871	1	2	0.770819	1.70624	0.552895	0.90078	1	2	0.825308	1.77191	0.520437	0.963978	1	2	4.15693	17.8386	0.0530083	0.993629	1
o__Clostridiales, 275069	11.8	0.0693836	1.04927	0.947264	0.989667	1	11.6	-0.413598	-1.332	0.695967	0.946826	1	11.8	-0.482981	-1.39763	0.646725	0.993871	1	11.6	-0.522645	-1.43659	0.622871	0.90078	1	11.8	-0.592028	-1.50736	0.575831	0.963978	1	7.6	-0.109047	-1.07852	0.918637	0.993629	1
o__Clostridiales, 271766	5.6	-0.0726051	-1.05161	0.949302	0.989667	1	5.4	-0.746602	-1.67784	0.523425	0.944901	1	5.6	-0.673997	-1.59549	0.562875	0.993871	1	5.4	-1.66366	-3.1682	0.177266	0.739844	1	5.6	-1.59106	-3.0127	0.195154	0.918974	1	2.8	-0.917061	-1.88827	0.464742	0.993629	1
f__S24-7, 264734	52.8	-0.0439294	-1.03092	0.956569	0.989667	1	52	-0.442687	-1.35913	0.58422	0.946826	1	52.8	-0.398758	-1.31837	0.621669	0.993871	1	52	-0.184438	-1.13637	0.819502	0.908844	1	52.8	-0.140509	-1.10229	0.861838	0.963978	1	37.6	0.258249	1.19603	0.749764	0.993629	1
o__Clostridiales, 263834	2.4	-0.0610941	-1.04326	0.963397	0.989667	1	2.2	-2.06585	-4.18681	0.178988	0.76967	1	2.4	-2.00476	-4.01321	0.189876	0.993871	1	2.2	-0.990474	-1.98684	0.482656	0.843731	1	2.4	-0.929379	-1.90446	0.507443	0.963978	1	1	1.07538	2.10727	0.501247	0.993629	1
f__S24-7, 259623	0.4	-0.0647386	-1.0459	0.962462	0.989667	1	0.4	-1.94675	-3.85506	0.35072	0.76967	1	0.4	-1.88201	-3.68589	0.363473	0.993871	1	0.4	-1.68923	-3.22484	0.396417	0.794631	1	0.4	-1.62449	-3.08333	0.411024	0.918974	1	0	0.257525	1.19543	0.918694	0.993629	1
f__S24-7, 258530	12.4	-0.0373939	-1.02626	0.963619	0.989667	1	12.6	0.208842	1.15576	0.798628	0.946826	1	12.6	0.246236	1.18611	0.762565	0.993871	1	12.2	-0.210344	-1.15696	0.799211	0.90078	1	12.4	-0.17295	-1.12736	0.833636	0.963978	1	12.6	-0.419186	-1.33717	0.610167	0.993629	1
o__Clostridiales, 233817	12.2	0.0710541	1.05048	0.946247	0.989667	1	11	-0.926285	-1.90038	0.389299	0.797157	1	12.2	-0.997339	-1.99632	0.351771	0.993871	1	11	-0.856304	-1.81039	0.426603	0.79601	1	12.2	-0.927358	-1.90179	0.387089	0.918974	1	5.4	0.0699813	1.0497	0.948991	0.997082	1
f__S24-7, 216495	67.6	0.0599598	1.04244	0.94333	0.989667	1	63.4	-0.389107	-1.30958	0.645322	0.946826	1	67.6	-0.449066	-1.36516	0.594846	0.993871	1	63.4	-0.0794813	-1.05664	0.925034	0.958343	1	67.6	-0.139441	-1.10148	0.868727	0.963978	1	49.4	0.309625	1.23939	0.714242	0.993629	1
f__S24-7, 211743	3.6	-0.0641855	-1.04549	0.954099	0.989667	1	3.6	-0.92641	-1.90054	0.426113	0.835076	1	3.4	-0.862225	-1.81784	0.456264	0.993871	1	3.8	0.183057	1.13529	0.869678	0.936882	1	3.8	0.247243	1.18694	0.823541	0.963978	1	3.8	1.10947	2.15766	0.337992	0.993629	1
g__Oscillospira, 204126	0.4	-0.06466	-1.04584	0.964242	0.989667	1	0.4	-1.94691	-3.85548	0.360902	0.770334	1	0.4	-1.88225	-3.6865	0.373546	0.993871	1	0.4	-1.68937	-3.22517	0.40742	0.794631	1	0.4	-1.62471	-3.08381	0.421865	0.918974	1	0	0.257539	1.19544	0.91986	0.993629	1
o__Clostridiales, 195445	0.4	-0.0661599	-1.04693	0.967907	0.989667	1	1.4	1.65648	3.15247	0.260271	0.76967	1	1.4	1.72264	3.30041	0.233263	0.993871	1	1	1.2605	2.39578	0.403646	0.794631	1	1	1.32666	2.50821	0.371254	0.918974	1	1.4	-0.395986	-1.31584	0.758769	0.993629	1
f__Ruminococcaceae, 193240	0.4	-0.0601357	-1.04256	0.967321	0.989667	1	0.4	-1.93573	-3.82572	0.367371	0.772654	1	0.4	-1.87559	-3.66953	0.378765	0.993871	1	0.4	0.227467	1.17078	0.876228	0.936882	1	0.4	0.287603	1.22061	0.841267	0.963978	1	0.4	2.1632	4.47906	0.30888	0.993629	1
f__S24-7, 189327	148.6	-0.0547336	-1.03867	0.938515	0.989667	1	143	0.0266913	1.01867	0.969998	0.982808	1	148.6	0.0814249	1.05806	0.908608	0.993871	1	143	-0.0713798	-1.05072	0.919924	0.955918	1	148.6	-0.0166462	-1.01161	0.981286	0.996175	1	136.6	-0.0980711	-1.07034	0.890104	0.993629	1
o__Clostridiales, 186645	9	-0.0844979	-1.06032	0.944583	0.989667	1	8.8	-1.20565	-2.30641	0.334292	0.76967	1	9	-1.12115	-2.17521	0.36801	0.993871	1	8.8	-1.5093	-2.84671	0.233491	0.739844	1	9	-1.4248	-2.68477	0.25949	0.918974	1	3	-0.303646	-1.23426	0.81468	0.993629	1
[truncated: 47 more rows]

## Sheet: TABLE2
Table 2: PERMANOVA analysis in mouse stool
PERMANOVA analysis (Bray-Curtis)
Variable	Groups	Pseudo-f statistic	p-value
Group	0, 1, 4, 9	5.75876	1e-05
[truncated: 77 more rows]

## Sheet: TABLE 3
Table 3: Comparison of OTUs abundance between various bead beating conditions in human stool
[truncated: 2,160 more rows]

[truncated: 12 more sheets: Table 4, TABLE 5, TABLE 6, TABLE 7, TABLE 8, TABLE 9, TABLE 10, TABLE 11, TABLE 12, Table 13, Table 14, Table 15]
